# Supplementary material for: Copper-catalyzed aminoalkynylation of alkenes with hypervalent iodine reagents
Source: PubMed Central journal article supplement (PMC5857935; doi:10.1039/c7sc03420b), 2017-10-16
Supplement: SC-008-C7SC03420B-s001.pdf [file SC-008-C7SC03420B-s001.pdf]

## Copper-Catalyzed Aminoalkynylation of Alkenes with Hypervalent Iodine Reagents

Kun Shen and Qiu Wang\*

Department of Chemistry, Duke University, Durham, North Carolina 27708

Email: qiu.wang@duke.edu

### Supporting Information

#### Content

|                                                                          |           |
|--------------------------------------------------------------------------|-----------|
| <b>I. General Procedures</b>                                             | S1        |
| <b>II. Materials and Instrumentation</b>                                 | S1–S2     |
| <b>III. Reaction Condition Optimization for Alkene Aminoalkynylation</b> | S2–S4     |
| <b>IV. Synthesis of Hypervalent Iodine Reagent 2l</b>                    | S4–S5     |
| <b>V. General Procedure for Alkene Aminoalkynylation Reaction</b>        | S5–S17    |
| <b>VI. Mechanism Investigation</b>                                       | S17–S19   |
| <b>VII. Synthesis of Bicyclic Heterocycles</b>                           | S19–S23   |
| <b>VIII. Synthesis of Alkyne-Labeled Mesembrane</b>                      | S24–S30   |
| <b>IX. References</b>                                                    | S30       |
| <b>X. NMR Spectra</b>                                                    | S31–S173  |
| <b>XI. X-Ray Data</b>                                                    | S174–S201 |

**I. General Procedures.** Glassware and stir bars were dried in an oven at 140 °C for at least 12 h and then cooled in a desiccator cabinet over Drierite prior to use. Optimization and substrate screens were performed in 8-mL microwave vials. Vials were fitted with crimp top septa under a positive pressure of N<sub>2</sub> that had been passed through a column (5 x 20 cm) of Drierite, unless otherwise noted. All other reactions were performed in round-bottom flasks sealed with rubber septa. Plastic syringes or glass pipets were used to transfer liquid reagents. Reactions were stirred magnetically using Teflon-coated, magnetic stir bars. Analytical thin-layer chromatography (TLC) was performed using aluminum plates pre-coated with 0.25 mm of 230–400 mesh silica gel impregnated with a fluorescent indicator (254 nm). TLC plates were visualized by exposure to ultraviolet light and/or exposure to KMnO<sub>4</sub> stain. Organic solutions were concentrated under reduced pressure using a rotary evaporator. Flash-column chromatography was performed on silica gel (60 Å, standard grade) or with pre-packed FLASH silica gel columns.

**II. Materials and Instrumentation.** Nuclear magnetic resonance spectra were recorded at ambient temperature (unless otherwise stated) on 400 MHz or 500 MHz spectrometers. All values for proton chemical shifts are reported in parts per million ( $\delta$ ) and are referenced to the residual protium in CDCl<sub>3</sub> ( $\delta$  7.26). All values for carbon chemical shifts are reported in parts per million ( $\delta$ ) and are referenced to the carbon resonances in CDCl<sub>3</sub> ( $\delta$  77.0). NMR data are represented as follows: chemical shift, multiplicity (s = singlet, d = doublet, t = triplet, q = quartet, quin = quintet, m = multiplet, br = broad), coupling constant

(Hz), and integration. Infrared spectroscopic data are reported in wavenumbers ( $\text{cm}^{-1}$ ). High-resolution mass spectra were obtained using a liquid chromatography-electrospray ionization and Time-of-flight mass spectrometer. Hypervalent iodine reagents were synthesized according to literature procedures.<sup>1</sup>

### III. Reaction Condition Optimization for Alkene Aminoalkynylation.

#### a. Screening of Catalyst and Catalyst loading<sup>a</sup>

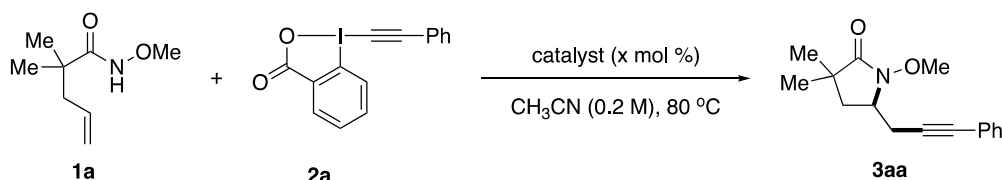

| entry | catalyst                                            | catalyst loading | yield <sup>b</sup> (%) |
|-------|-----------------------------------------------------|------------------|------------------------|
| 1     | Cu(OTf) <sub>2</sub>                                | 10 mol%          | 69                     |
| 2     | Cu(OAc) <sub>2</sub>                                | 10 mol%          | 33                     |
| 3     | Cu(acac) <sub>2</sub>                               | 10 mol%          | 34                     |
| 4     | CuCl <sub>2</sub>                                   | 10 mol%          | 26                     |
| 5     | CuOTf•1/2PhCH <sub>3</sub>                          | 10 mol%          | 63                     |
| 6     | Cu(CH <sub>3</sub> CN) <sub>4</sub> PF <sub>6</sub> | 10 mol%          | 69                     |
| 7     | Cu(CH <sub>3</sub> CN) <sub>4</sub> BF <sub>4</sub> | 10 mol%          | 67                     |
| 8     | -                                                   | -                | 15                     |
| 9     | Cu(OTf) <sub>2</sub>                                | 5 mol%           | 73                     |
| 10    | Cu(OTf) <sub>2</sub>                                | 2 mol%           | 76                     |
| 11    | Cu(OTf) <sub>2</sub>                                | 1 mol%           | 78                     |

<sup>a</sup>Reaction Conditions: The reactions were performed in a sealed tube with **1a** (0.20 mmol, 1.0 equiv), **2a** (1.2 equiv), catalyst (1–10 mol%) and CH<sub>3</sub>CN (1 mL) at 80 °C for 4 h, unless otherwise noted. <sup>b</sup>The yield was determined by <sup>1</sup>H NMR with dibromomethane as an internal standard.

#### b. Screening of Temperature<sup>a</sup>

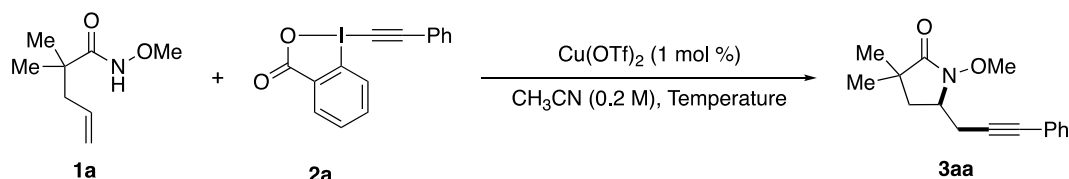

| entry | T (°C) | Time | yield <sup>b</sup> (%) |
|-------|--------|------|------------------------|
| 1     | rt     | 12 h | 0                      |
| 2     | 40     | 12 h | 15                     |
| 3     | 60     | 12 h | 37                     |
| 4     | 80     | 4 h  | 78                     |
| 5     | 100    | 4 h  | 84                     |

<sup>a</sup>Reaction Conditions: The reactions were performed in a sealed tube with **1a** (0.20 mmol, 1.0 equiv), **2a** (1.2 equiv), Cu(OTf)<sub>2</sub> (1 mol%) and CH<sub>3</sub>CN (1 mL), unless otherwise noted. <sup>b</sup>The yield was determined by <sup>1</sup>H NMR with dibromomethane as an internal standard.

### c. Screening of Additives<sup>a</sup>

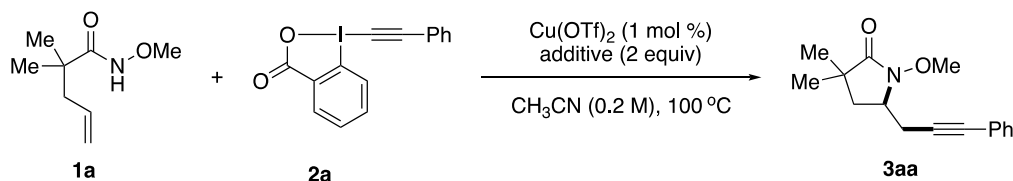

| entry          | additives                                   | yield <sup>b</sup> (%) |
|----------------|---------------------------------------------|------------------------|
| 1              | -                                           | 84                     |
| 2 <sup>c</sup> | -                                           | 0 <sup>d</sup>         |
| 3              | $\text{K}_2\text{CO}_3$                     | 28                     |
| 4              | $\text{Na}_2\text{CO}_3$                    | 37                     |
| 5              | $\text{NEt}(\text{iPr})_2$                  | 0                      |
| 6              | 2,6-lutidine                                | 49                     |
| 7              | 2,6-di- <i>tert</i> -butyl-4-methylpyridine | 67                     |

<sup>a</sup>Reaction Conditions: The reactions were performed in a sealed tube with **1a** (0.20 mmol, 1.0 equiv), **2a** (1.2 equiv),  $\text{Cu}(\text{OTf})_2$  (1 mol%), additive (2.0 equiv) and  $\text{CH}_3\text{CN}$  (1 mL) at  $100\text{ }^\circ\text{C}$  for 12 h, unless otherwise noted. <sup>b</sup>The yield was determined by  $^1\text{H}$  NMR with dibromomethane as an internal standard. <sup>c</sup>The reaction was run without **2a**. <sup>d</sup>55% recovery of **1a** and 32% of hydroamination product.

### d. Screening of Ligands<sup>a</sup>

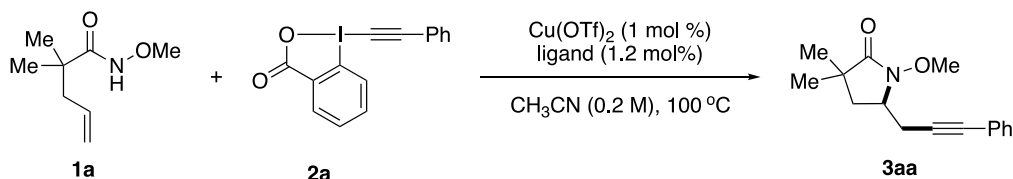

| entry | ligand               | yield <sup>b</sup> (%) |
|-------|----------------------|------------------------|
| 1     | -                    | 84                     |
| 2     | bpy                  | 44                     |
| 3     | 1,10-phenanthroline  | 36                     |
| 4     | bathophenanthroline  | 45                     |
| 5     | bathocuproine        | 44                     |
| 6     | biquinoline          | 57                     |
| 7     | di(2-pyridyl) ketone | 64                     |
| 8     | binap                | 71                     |
| 9     | dppbz                | 70                     |
| 10    | dpephos              | 75                     |
| 11    | xantphos             | 70                     |

<sup>a</sup>Reaction Conditions: The reactions were performed in a sealed tube with **1a** (0.20 mmol, 1.0 equiv), **2a** (1.2 equiv),  $\text{Cu}(\text{OTf})_2$  (1 mol%), ligand (1.2 mol%) and  $\text{CH}_3\text{CN}$  (1 mL) at  $100\text{ }^\circ\text{C}$  for 12 h, unless otherwise noted. <sup>b</sup>The yield was determined by  $^1\text{H}$  NMR with dibromomethane as an internal standard.

### e. Screening of Hypervalent Iodine Reagents<sup>a</sup>

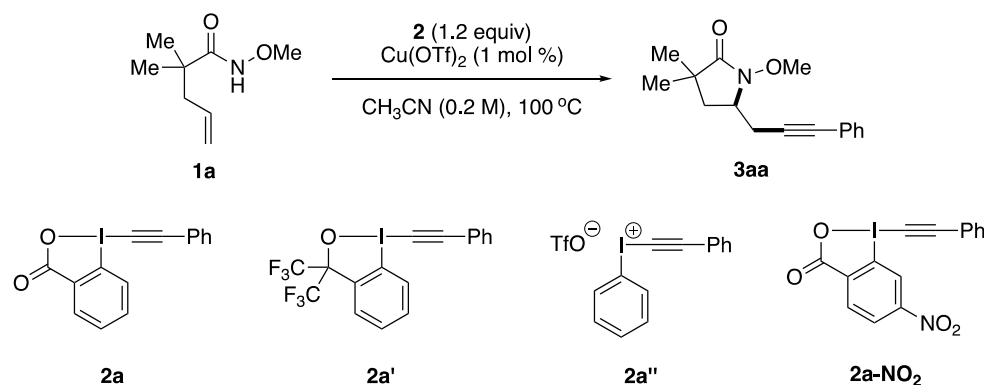

| entry | 2                  | yield <sup>b</sup> (%) |
|-------|--------------------|------------------------|
| 1     | 2a                 | 84                     |
| 2     | 2a'                | 57                     |
| 3     | 2a''               | <5                     |
| 4     | 2a-NO <sub>2</sub> | 19                     |

<sup>a</sup>Reaction Conditions: The reactions were performed in a sealed tube with **1a** (0.20 mmol, 1.0 equiv), **2** (1.2 equiv), Cu(OTf)<sub>2</sub> (1 mol%) and CH<sub>3</sub>CN (1 mL) at 100 °C for 5 h, unless otherwise noted. <sup>b</sup>The yield was determined by <sup>1</sup>H NMR with dibromomethane as an internal standard.

### f. Reactions of Amides Bearing Different Protecting Groups<sup>a</sup>

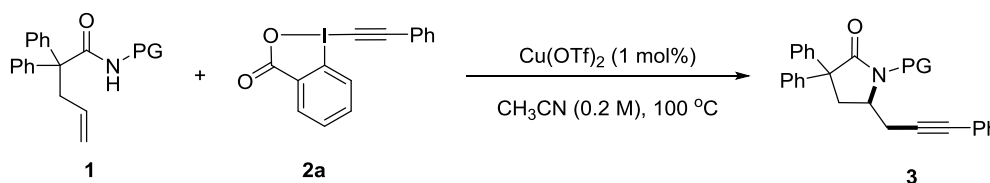

| entry | 1              | 3      | yield (%) <sup>b</sup>            |
|-------|----------------|--------|-----------------------------------|
| 1     | 1b, PG = OMe   | 3ba    | 71                                |
| 2     | 1b-S1, PG = Ts | 3ba-S1 | 0 <sup>c</sup> (100) <sup>d</sup> |
| 3     | 1b-S2, PG = H  | 3ba-S2 | 0 <sup>c</sup> (86) <sup>d</sup>  |
| 4     | 1b-S3, PG = Ph | 3ba-S3 | 0 <sup>c</sup> (100) <sup>d</sup> |
| 5     | 1b-S4, PG = Bn | 3ba-S4 | 0 <sup>c</sup> (100) <sup>d</sup> |

<sup>a</sup>Reaction Conditions: The reactions were performed in a sealed tube with **1a** (0.20 mmol, 1.0 equiv), **2a** (1.2 equiv), Cu(OTf)<sub>2</sub> (1 mol%) and CH<sub>3</sub>CN (1 mL), unless otherwise noted. <sup>b</sup>The yield was determined by <sup>1</sup>H NMR with dibromomethane as an internal standard. <sup>c</sup>Desired aminoalkynylation product not detected by either GC-MS or <sup>1</sup>H NMR.

<sup>d</sup>The recovery of starting material **1** was indicated in the parenthesis.

### IV. Synthesis of Hypervalent Iodine Reagent 2I

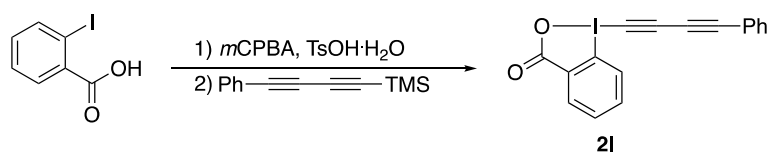

Following a reported procedure with appropriate modifications,<sup>1</sup> 2-iodobenzoic acid (4.96 g, 20.0 mmol, 1.0 equiv), *para*-toluenesulfonic acid monohydrate (3.8 g, 20.0 mmol, 1.0 equiv) and *meta*-chloroperoxybenzoic

acid ( $\leq 77\%$ , 5.4 g, 22.0 mmol, 1.1 equiv) were dissolved in  $\text{CH}_2\text{Cl}_2$  (30 mL) and 2,2,2-trifluoroethanol (30 mL). The mixture was stirred at room temperature under  $\text{N}_2$  for 1 h, after which trimethyl(phenylbuta-1,3-diyn-1-yl)silane (5.54 g, 28.0 mmol, 1.4 equiv) was added in one portion. The reaction mixture was stirred at room temperature overnight, filtered and concentrated *in vacuo*. The resulting oil was dissolved in  $\text{CH}_2\text{Cl}_2$  (100 mL) and under vigorous stirring, saturated solution of  $\text{NaHCO}_3$  (100 mL) was added. The mixture was stirred for 1 h, the two layers were separated and the aqueous layer was extracted with  $\text{CH}_2\text{Cl}_2$  (3 x 50 mL). The combined organic layers were dried over  $\text{NaSO}_4$ , filtered, and concentrated *in vacuo*. Recrystallization in  $\text{CH}_3\text{CN}$  afford **2I** (2.38 g, 6.4 mmol, 32%) as a yellow solid.  $R_f = 0.47$  (100% EtOAc);  $^1\text{H}$  NMR (500 MHz, DMSO):  $\delta$  8.25 (d,  $J = 8.0$  Hz, 1H), 8.12 (d,  $J = 7.0$  Hz, 1H), 7.93 (t,  $J = 7.0$  Hz, 1H), 7.82 (t,  $J = 7.0$  Hz, 1H), 7.69 (d,  $J = 7.0$  Hz, 2H), 7.55 (t,  $J = 7.5$  Hz, 1H), 7.48 (t,  $J = 7.5$  Hz, 2H);  $^{13}\text{C}$  NMR (125 MHz, DMSO):  $\delta$  166.3, 135.4, 133.2, 131.7, 131.5, 131.4, 131.0, 129.1, 127.6, 119.0, 116.7, 87.2, 80.1, 73.0, 50.8; IR (neat): 3057, 2918, 2098, 1644, 1437, 1285, 1237, 1118, 826, 746, 682  $\text{cm}^{-1}$ ; HRMS ( $m/z$ ) Calcd for  $(\text{C}_{17}\text{H}_{10}\text{IO}_2)$  ( $[\text{M}+\text{H}]^+$ ): 372.9720; found: 372.9725.

## V. General Procedure for Alkene Aminoalkynylation Reaction.

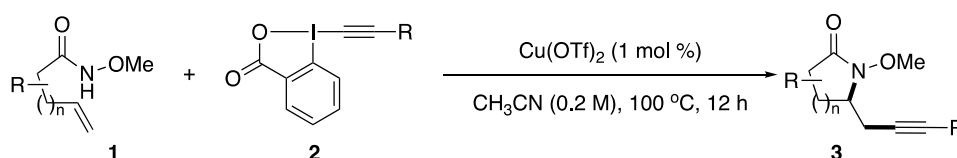

To a reaction tube charged with *N*-methoxyamide **1** (0.3 mmol, 1.0 equiv) and hypervalent iodine reagent **2** (0.36 mmol, 1.2 equiv), was added  $\text{Cu}(\text{OTf})_2$  (1.09 mg, 0.003 mmol, 1 mol %) and  $\text{CH}_3\text{CN}$  (1.5 mL). The reaction tube was capped and the resulting mixture was allowed to stir at 100 °C for 12 h. After cooling down to room temperature, the reaction mixture was filtered through a pad of basic  $\text{Al}_2\text{O}_3$  and washed with EtOAc (15 mL). The filtrate was concentrated *in vacuo*. The resulting crude mixture was subject to flash column chromatography to provide the aminoalkynylation product **3**.

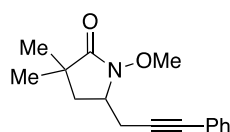

**1-Methoxy-3,3-dimethyl-5-(3-phenylprop-2-yn-1-yl)pyrrolidin-2-one (3aa)**. Purification by column chromatography (20% EtOAc in hexanes) gave **3aa** as a yellow oil (58.4 mg, 76% yield);  $R_f = 0.30$  (33% EtOAc in hexanes);  $^1\text{H}$  NMR (400 MHz,  $\text{CDCl}_3$ ):  $\delta$  7.39–7.27 (m, 2H), 7.27–7.16 (m, 3H), 3.82 (s, 3H), 3.82–3.74 (m, 1H), 2.81–2.68 (m, 2H), 1.99 (dd,  $J = 12.8, 7.2$  Hz, 1H), 1.81 (dd,  $J = 12.8, 8.4$  Hz, 1H), 1.18 (s, 3H), 1.09 (s, 3H);  $^{13}\text{C}$  NMR (100 MHz,  $\text{CDCl}_3$ ):  $\delta$  175.8, 131.1, 127.9, 127.7, 122.7, 84.1, 83.3, 62.5, 53.4, 37.0, 36.7, 25.3, 24.6, 23.2; IR (neat): 2964, 2932, 2869, 1707, 1441, 1365, 1240, 1037, 1014, 926, 755, 729, 691  $\text{cm}^{-1}$ ; HRMS ( $m/z$ ) Calcd for  $(\text{C}_{16}\text{H}_{20}\text{NO}_2)$  ( $[\text{M}+\text{H}]^+$ ): 258.1489; found: 258.1490.

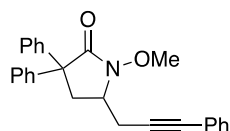

**1-Methoxy-3,3-diphenyl-5-(3-phenylprop-2-yn-1-yl)pyrrolidin-2-one (3ba).** Purification by column chromatography (10% EtOAc in hexanes) gave **3ba** as a yellow oil (81.6 mg, 71% yield);  $R_f = 0.65$  (33% EtOAc in hexanes);  $^1\text{H NMR}$  (500 MHz,  $\text{CDCl}_3$ ):  $\delta$  7.50–7.10 (m, 15H), 3.98 (s, 3H), 3.01 (dd,  $J = 13.0, 6.5$  Hz, 1H), 2.95–2.85 (m, 2H), 2.78 (dd,  $J = 13.0, 9.0$  Hz, 1H);  $^{13}\text{C NMR}$  (125 MHz,  $\text{CDCl}_3$ ):  $\delta$  172.1, 143.7, 141.1, 131.5, 128.4, 128.26, 128.20, 128.0, 127.7, 127.6, 122.8, 84.14, 84.12, 63.2, 54.5, 54.0, 37.8, 23.1; IR (neat): 2935, 1705, 1489, 1443, 1367, 1238, 1043, 754, 690  $\text{cm}^{-1}$ ; HRMS ( $m/z$ ) Calcd for ( $\text{C}_{26}\text{H}_{24}\text{NO}_2$ ) ( $[\text{M}+\text{H}]^+$ ): 382.1802; found: 382.1802.

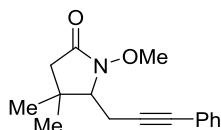

**1-Methoxy-4,4-dimethyl-5-(3-phenylprop-2-yn-1-yl)pyrrolidin-2-one (3ca).** Purification by column chromatography (33% EtOAc in hexanes) gave **3ca** as a yellow oil (58.4 mg, 76% yield);  $R_f = 0.18$  (33% EtOAc in hexanes);  $^1\text{H NMR}$  (500 MHz,  $\text{CDCl}_3$ ):  $\delta$  7.45–7.35 (m, 2H), 7.34–7.24 (m, 3H), 3.86 (s, 3H), 3.58 (dd,  $J = 6.5, 4.0$  Hz, 1H), 2.82 (dd,  $J = 17.0, 6.5$  Hz, 1H), 2.75 (dd,  $J = 17.0, 4.0$  Hz, 1H), 2.42 (d,  $J = 17.0$  Hz, 1H), 2.13 (d,  $J = 17.0$  Hz, 1H), 1.28 (s, 6H);  $^{13}\text{C NMR}$  (125 MHz,  $\text{CDCl}_3$ ):  $\delta$  170.2, 131.3, 128.2, 128.0, 123.0, 85.1, 83.5, 65.2, 62.5, 43.0, 33.5, 29.8, 23.2, 19.4; IR (neat): 2960, 2931, 1706, 1490, 1441, 1368, 1241, 1064, 756, 691  $\text{cm}^{-1}$ ; HRMS ( $m/z$ ) Calcd for ( $\text{C}_{16}\text{H}_{20}\text{NO}_2$ ) ( $[\text{M}+\text{H}]^+$ ): 258.1489; found: 258.1488.

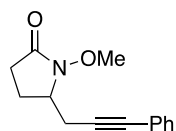

**1-Methoxy-5-(3-phenylprop-2-yn-1-yl)pyrrolidin-2-one (3da).** Purification by column chromatography (33% EtOAc in hexanes) gave **3da** as a colorless oil (23.7 mg, 35% yield);  $R_f = 0.10$  (33% EtOAc in hexanes);  $^1\text{H NMR}$  (400 MHz,  $\text{CDCl}_3$ ):  $\delta$  7.40–7.30 (m, 2H), 7.30–7.20 (m, 3H), 3.95–3.85 (m, 1H), 3.84 (s, 3H), 2.85–2.65 (m, 2H), 2.52–2.38 (m, 1H), 2.35–2.10 (m, 2H), 2.09–1.93 (m, 1H);  $^{13}\text{C NMR}$  (100 MHz,  $\text{CDCl}_3$ ):  $\delta$  171.3, 131.4, 128.2, 128.0, 122.9, 84.2, 83.3, 63.0, 55.8, 26.9, 23.3, 20.7; IR (neat): 2936, 1701, 1489, 1440, 1360, 1277, 1052, 964, 756, 692  $\text{cm}^{-1}$ ; HRMS ( $m/z$ ) Calcd for ( $\text{C}_{14}\text{H}_{16}\text{NO}_2$ ) ( $[\text{M}+\text{H}]^+$ ): 230.1176; found: 230.1177.

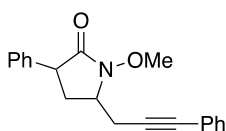

**1-Methoxy-3-phenyl-5-(3-phenylprop-2-yn-1-yl)pyrrolidin-2-one (3ea).** The crude reaction mixture contains two diastereoisomers with d.r. = 2.5:1 detected by  $^1\text{H NMR}$ . Purification by column chromatography (25% EtOAc in hexanes) gave **3ea** as a mixture of two separable diastereoisomers (35.2 mg major and 14.1 mg minor, 54% yield; relative stereochemistry was assigned on the basis of  $^1\text{H NMR}$ .<sup>2</sup>).

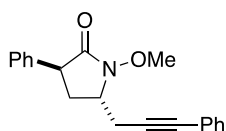

**Major diastereomer:** Yellow oil;  $R_f = 0.35$  (33% EtOAc in hexanes);  $^1\text{H NMR}$  (500 MHz,  $\text{CDCl}_3$ ):  $\delta$  7.50–7.20 (m, 10H), 4.20–4.10 (m, 1H), 3.94 (s, 3H), 3.86 (dd,  $J = 10.0, 8.0$  Hz, 1H), 2.94–2.80 (m, 2H), 2.62 (ddd,  $J = 13.0, 10.0, 3.5$  Hz, 1H), 2.33 (dd,

$J = 13.0, 8.0$  Hz, 1H);  $^{13}\text{C}$  NMR (125 MHz,  $\text{CDCl}_3$ ):  $\delta$  170.7, 139.3, 131.5, 128.8, 128.3, 128.1, 127.6, 127.2, 122.9, 84.4, 83.5, 62.9, 54.3, 43.8, 30.9, 23.2; IR (neat): 2935, 1705, 1489, 1441, 1362, 1264, 1044, 959, 756, 691  $\text{cm}^{-1}$ ; HRMS ( $m/z$ ) Calcd for ( $\text{C}_{20}\text{H}_{20}\text{NO}_2$ ) ( $[\text{M}+\text{H}]^+$ ): 306.1489; found: 306.1485.

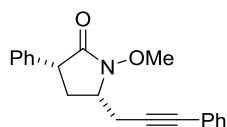

**Mnior diastereomer:** Yellow oil;  $R_f = 0.23$  (33% EtOAc in hexanes);  $^1\text{H}$  NMR (500 MHz,  $\text{CDCl}_3$ ):  $\delta$  7.45–7.38 (m, 2H), 7.37–7.24 (m, 8H), 4.01 (s, 3H), 3.98–3.89 (m, 1H), 3.62 (t,  $J = 10.0$  Hz, 1H), 2.99 (dd,  $J = 17.0, 6.0$  Hz, 1H), 2.87 (dd,  $J = 17.0, 3.5$  Hz, 1H), 2.74–2.64 (m, 1H), 2.26–2.16 (m, 1H);  $^{13}\text{C}$  NMR (125 MHz,  $\text{CDCl}_3$ ):  $\delta$  172.3, 138.9, 131.5, 128.7, 128.3, 128.1, 128.0, 127.2, 122.9, 84.2 (2C), 63.8, 55.2, 45.0, 31.0, 23.5; IR (neat): 2938, 1711, 1490, 1448, 1365, 1267, 1045, 757, 694  $\text{cm}^{-1}$ ; HRMS ( $m/z$ ) Calcd for ( $\text{C}_{20}\text{H}_{20}\text{NO}_2$ ) ( $[\text{M}+\text{H}]^+$ ): 306.1489; found: 306.1487.

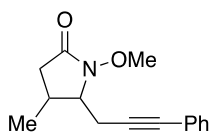

**1-Methoxy-4-methyl-5-(3-phenylprop-2-yn-1-yl)pyrrolidin-2-one (3fa).** The crude reaction mixture contains two diastereoisomers with d.r. = 1:1 detected by  $^1\text{H}$  NMR. Purification by column chromatography (25% EtOAc in hexanes) gave **3ea** as a mixture of two separable diastereoisomers (18.9 mg and 18.3 mg, 51% yield; relative stereochemistry was assigned on the basis of  $^1\text{H}$  NMR,<sup>3</sup> the signals of methyne protons at C-5 in the *trans* isomers were reported to appear at a higher field than those of the *cis* isomers.).

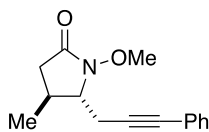

**Diastereomer I:** Yellow solid;  $R_f = 0.18$  (33% EtOAc in hexanes);  $^1\text{H}$  NMR (500 MHz,  $\text{CDCl}_3$ ):  $\delta$  7.43–7.33 (m, 2H), 7.33–7.23 (m, 3H), 3.89 (s, 3H), 3.52–3.42 (m, 1H), 2.88–2.74 (m, 2H), 2.65 (dd,  $J = 17.0, 9.0$  Hz, 1H), 2.45–2.35 (m, 1H), 1.95 (dd,  $J = 17.0, 7.0$  Hz, 1H), 1.21 (d,  $J = 7.0$  Hz, 3H);  $^{13}\text{C}$  NMR (125 MHz,  $\text{CDCl}_3$ ):  $\delta$  170.6, 131.4, 128.2, 128.0, 122.9, 84.4, 83.5, 63.3, 63.0, 35.7, 28.9, 22.2, 19.5; IR (neat): 2961, 2931, 1717, 1489, 1441, 1377, 1290, 1250, 1056, 972, 756, 691  $\text{cm}^{-1}$ ; HRMS ( $m/z$ ) Calcd for ( $\text{C}_{16}\text{H}_{18}\text{NO}_2$ ) ( $[\text{M}+\text{H}]^+$ ): 244.1332; found: 244.1333.

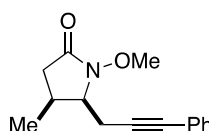

**Diastereomer II:** Yellow solid;  $R_f = 0.12$  (33% EtOAc in hexanes);  $^1\text{H}$  NMR (500 MHz,  $\text{CDCl}_3$ ):  $\delta$  7.43–7.33 (m, 2H), 7.33–7.23 (m, 3H), 4.00–3.90 (m, 1H), 3.85 (s, 3H), 2.83 (dd,  $J = 17.0, 7.0$  Hz, 1H), 2.69 (dd,  $J = 17.0, 3.0$  Hz, 1H), 2.66–2.54 (m, 1H), 2.44 (dd,  $J = 17.0, 9.0$  Hz, 1H), 2.25 (dd,  $J = 17.0, 8.5$  Hz, 1H), 1.27 (d,  $J = 7.0$  Hz, 3H);  $^{13}\text{C}$  NMR (125 MHz,  $\text{CDCl}_3$ ):  $\delta$  171.2, 131.3, 128.2, 128.0, 123.0, 85.0, 83.5, 62.7, 59.0, 35.6, 27.5, 18.7, 14.8; IR (neat): 2967, 2932, 1707, 1489, 1441, 1381, 1261, 1059, 964, 756, 691, 632, 586  $\text{cm}^{-1}$ ; HRMS ( $m/z$ ) Calcd for ( $\text{C}_{16}\text{H}_{18}\text{NO}_2$ ) ( $[\text{M}+\text{H}]^+$ ): 244.1332; found: 244.1334.

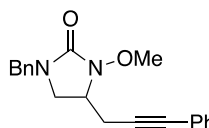

**1-Benzyl-3-methoxy-4-(3-phenylprop-2-yn-1-yl)imidazolidin-2-one (3ga).** Purification by column chromatography (20% EtOAc in hexanes) gave **3ga** as a yellow oil (72.1 mg, 75% yield);  $R_f = 0.40$  (33% EtOAc in hexanes);  $^1\text{H}$  NMR (500 MHz,  $\text{CDCl}_3$ ):  $\delta$  7.45–7.15 (m, 10H), 4.47 (d,  $J = 15.0$  Hz, 1H), 4.37 (d,  $J = 15.0$  Hz, 1H), 3.92 (s, 3H), 3.79–3.69 (m, 1H), 3.31 (t,  $J = 8.5$  Hz, 1H), 3.09 (t,  $J = 8.5$  Hz, 1H), 2.90 (dd,

$J = 17.0, 4.0$  Hz, 1H), 2.73 (dd,  $J = 17.0, 7.5$  Hz, 1H);  $^{13}\text{C}$  NMR (125 MHz,  $\text{CDCl}_3$ ):  $\delta$  161.9, 135.8, 131.5, 128.7, 128.2, 128.1, 128.0, 127.7, 122.9, 84.2, 83.3, 64.6, 57.4, 47.7, 45.1, 22.1; IR (neat): 2933, 1724, 1489, 1435, 1259, 1030, 754, 691, 631  $\text{cm}^{-1}$ ; HRMS ( $m/z$ ) Calcd for ( $\text{C}_{21}\text{H}_{21}\text{N}_2\text{O}_2$ ) ( $[\text{M}+\text{H}]^+$ ): 321.1598; found: 321.1600.

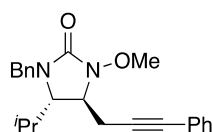

**(4S,5S)-1-Benzyl-5-isopropyl-3-methoxy-4-(3-phenylprop-2-yn-1-yl)imidazolidin-2-one (3ha).** Only one diastereomer was observed from the crude  $^1\text{H}$  NMR. Purification by column chromatography (20% EtOAc in hexanes) gave **3ha** as a yellow oil (84.1 mg, 78% yield);  $R_f = 0.51$  (33% EtOAc in hexanes);  $^1\text{H}$  NMR (500 MHz,  $\text{CDCl}_3$ ):  $\delta$  7.40–7.15 (m, 10H), 4.92 (d,  $J = 15.5$  Hz, 1H), 3.96 (d,  $J = 15.5$  Hz, 1H), 3.92 (s, 3H), 3.60 (q,  $J = 5.0$  Hz, 1H), 3.36 (dd,  $J = 5.0, 3.0$  Hz, 1H), 2.72 (d,  $J = 5.0$  Hz, 2H), 2.14–1.98 (m, 1H), 0.93 (d,  $J = 7.0$  Hz, 3H), 0.87 (d,  $J = 7.0$  Hz, 3H);  $^{13}\text{C}$  NMR (125 MHz,  $\text{CDCl}_3$ ):  $\delta$  161.1, 135.9, 131.5, 128.5, 128.1, 128.0, 127.9, 127.4, 123.1, 84.8, 83.5, 64.4, 59.6, 56.2, 45.1, 27.2, 22.7, 18.1, 15.8; IR (neat): 2961, 2933, 2896, 1719, 1490, 1419, 1245, 1029, 755, 691, 631  $\text{cm}^{-1}$ ; HRMS ( $m/z$ ) Calcd for ( $\text{C}_{23}\text{H}_{27}\text{N}_2\text{O}_2$ ) ( $[\text{M}+\text{H}]^+$ ): 363.2067; found: 363.2071.

Stereochemistry was assigned on the basis of NOESY.

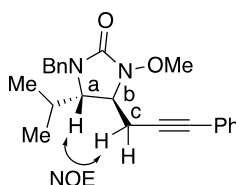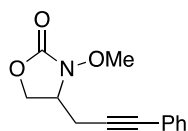

**3-Methoxy-4-(3-phenylprop-2-yn-1-yl)oxazolidin-2-one (3ia).** Purification by column chromatography (20% EtOAc in hexanes) gave **3ia** as a yellow solid (29.0 mg, 42% yield);  $R_f = 0.46$  (33% EtOAc in hexanes);  $^1\text{H}$  NMR (500 MHz,  $\text{CDCl}_3$ ):  $\delta$  7.46–7.36 (m, 2H), 7.36–7.26 (m, 3H), 4.43 (t,  $J = 8.0$  Hz, 1H), 4.25 (t,  $J = 8.0$  Hz, 1H), 4.13–4.05 (m, 1H), 3.89 (s, 3H), 2.89 (dd,  $J = 17.0, 4.0$  Hz, 1H), 2.83 (dd,  $J = 17.0, 7.0$  Hz, 1H);  $^{13}\text{C}$  NMR (125 MHz,  $\text{CDCl}_3$ ):  $\delta$  158.3, 131.5 (2C), 128.33, 128.30 (2C), 122.5, 84.1, 82.5, 65.4, 64.2, 56.8, 21.2; IR (neat): 2974, 2938, 1770, 1661, 1490, 1394, 1209, 1070, 1021, 983, 754, 691  $\text{cm}^{-1}$ ; HRMS ( $m/z$ ) Calcd for ( $\text{C}_{13}\text{H}_{14}\text{NO}_3$ ) ( $[\text{M}+\text{H}]^+$ ): 232.0968; found: 232.0970.

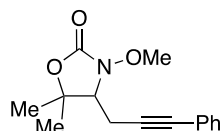

**3-Methoxy-5,5-dimethyl-4-(3-phenylprop-2-yn-1-yl)oxazolidin-2-one (3ja).** Purification by column chromatography (20% EtOAc in hexanes) gave **3ja** as a yellow solid (53.6 mg, 69% yield);  $R_f = 0.63$  (33% EtOAc in hexanes);  $^1\text{H}$  NMR (500 MHz,  $\text{CDCl}_3$ ):  $\delta$  7.43–7.35 (m, 2H), 7.34–7.28 (m, 3H), 3.85 (s, 3H), 3.76–3.68 (m, 1H), 2.95 (dd,  $J = 17.0, 4.0$  Hz, 1H), 2.71 (dd,  $J = 17.0, 9.5$  Hz, 1H), 1.59 (s, 3H), 1.52 (s,



3H);  $^{13}\text{C}$  NMR (125 MHz,  $\text{CDCl}_3$ ):  $\delta$  157.8, 131.4 (2C), 128.3 (3C), 122.6, 83.6, 83.5, 80.6, 65.8, 64.2, 28.0, 21.6, 19.0; IR (neat): 2979, 2937, 1772, 1490, 1441, 1374, 1277, 1072, 755, 691  $\text{cm}^{-1}$ ; HRMS (m/z) Calcd for ( $\text{C}_{15}\text{H}_{18}\text{NO}_3$ ) ( $[\text{M}+\text{H}]^+$ ): 260.1281; found: 260.1283.

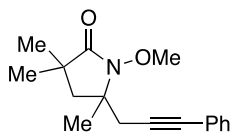

**1-Methoxy-3,3,5-trimethyl-5-(3-phenylprop-2-yn-1-yl)pyrrolidin-2-one (3ka).** Purification by column chromatography (20% EtOAc in hexanes) gave **3ka** as a yellow oil (56.2 mg, 69% yield);  $R_f$  = 0.44 (33% EtOAc in hexanes);  $^1\text{H}$  NMR (500 MHz,  $\text{CDCl}_3$ ):  $\delta$  7.45–7.35 (m, 2H), 7.34–7.24 (m, 3H), 3.96 (s, 3H), 2.78 (d,  $J$  = 17.0 Hz, 1H), 2.65 (d,  $J$  = 17.0 Hz, 1H), 2.27 (d,  $J$  = 13.5 Hz, 1H), 1.89 (dd,  $J$  = 13.5 Hz, 1H), 1.43 (s, 3H), 1.26 (s, 3H);  $^{13}\text{C}$  NMR (125 MHz,  $\text{CDCl}_3$ ):  $\delta$  175.1, 131.4, 128.2, 128.0, 123.0, 85.6, 83.6, 64.0, 60.7, 43.6, 36.4, 30.7, 27.7, 27.0, 25.7; IR (neat): 2968, 2938, 2869, 1703, 1489, 1442, 1385, 1016, 756, 691  $\text{cm}^{-1}$ ; HRMS (m/z) Calcd for ( $\text{C}_{17}\text{H}_{22}\text{NO}_2$ ) ( $[\text{M}+\text{H}]^+$ ): 272.1645; found: 272.1642.

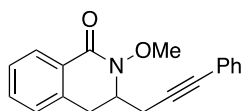

**2-Methoxy-3-(3-phenylprop-2-yn-1-yl)-3,4-dihydroisoquinolin-1(2H)-one (3la).** Purification by column chromatography (20% EtOAc in hexanes) gave **3la** as a yellow oil (66.3 mg, 76% yield);  $R_f$  = 0.48 (33% EtOAc in hexanes);  $^1\text{H}$  NMR (400 MHz,  $\text{CDCl}_3$ ):  $\delta$  8.12 (d,  $J$  = 8.0 Hz, 1H), 7.50–7.20 (m, 8H), 4.24–4.10 (m, 1H), 3.96 (s, 3H), 3.52–3.32 (m, 2H), 2.97 (dd,  $J$  = 16.8, 3.6 Hz, 1H), 2.68 (dd,  $J$  = 16.8, 9.2 Hz, 1H);  $^{13}\text{C}$  NMR (100 MHz,  $\text{CDCl}_3$ ):  $\delta$  163.4, 135.3, 132.5, 131.5 (2C), 128.2 (2C), 128.1 (2C), 128.0, 127.9, 127.1, 123.0, 85.3, 83.4, 63.1, 57.9, 32.7, 21.8; IR (neat): 3054, 2935, 1669, 1264, 1242, 1021, 998, 730, 689  $\text{cm}^{-1}$ ; HRMS (m/z) Calcd for ( $\text{C}_{19}\text{H}_{18}\text{NO}_2$ ) ( $[\text{M}+\text{H}]^+$ ): 292.1332; found: 292.1335.

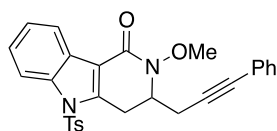

**2-Methoxy-3-(3-phenylprop-2-yn-1-yl)-5-tosyl-2,3,4,5-tetrahydro-1H-pyrido[4,3-b]indol-1-one (3ma).** Purification by column chromatography (20% EtOAc in hexanes) gave **3ma** as a yellow oil (66.8 mg, 46% yield);  $R_f$  = 0.45 (33% EtOAc in hexanes);  $^1\text{H}$  NMR (500 MHz,  $\text{CDCl}_3$ ):  $\delta$  8.28–8.19 (m, 1H), 8.19–8.11 (m, 1H), 7.83 (d,  $J$  = 8.5 Hz, 2H), 7.45–7.25 (m, 7H), 7.14 (d,  $J$  = 8.5 Hz, 2H), 4.32–4.22 (m, 1H), 4.12 (dd,  $J$  = 18.0, 4.0 Hz, 1H), 3.95 (s, 3H), 3.74 (dd,  $J$  = 18.0, 6.0 Hz, 1H), 3.03 (dd,  $J$  = 17.0, 3.5 Hz, 1H), 2.76 (dd,  $J$  = 17.0, 9.5 Hz, 1H), 2.29 (s, 3H);  $^{13}\text{C}$  NMR (125 MHz,  $\text{CDCl}_3$ ):  $\delta$  163.5, 145.7, 140.2, 136.2, 134.9, 131.4, 130.1, 128.2, 128.1, 126.5, 126.1, 125.1, 124.7, 122.8, 121.3, 113.8, 111.8, 85.1, 84.1, 63.4, 58.3, 28.5, 21.5, 21.3; IR (neat): 3054, 2934, 1675, 1449, 1419, 1375, 1264, 1172, 1037, 731, 684, 659, 569, 539  $\text{cm}^{-1}$ ; HRMS (m/z) Calcd for ( $\text{C}_{28}\text{H}_{25}\text{N}_2\text{O}_4\text{S}$ ) ( $[\text{M}+\text{H}]^+$ ): 485.1530; found: 485.1534.

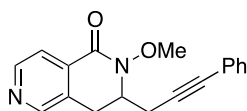

**2-Methoxy-3-(3-phenylprop-2-yn-1-yl)-3,4-dihydro-2,6-naphthyridin-1(2H)-one (3na).** Purification by column chromatography (75% EtOAc in hexanes) gave **3na** as a yellow oil (35.0 mg, 40% yield);  $R_f$  = 0.16 (67% EtOAc in hexanes);  $^1\text{H}$  NMR (500 MHz,  $\text{CDCl}_3$ ):  $\delta$  8.77–7.50 (m, 2H), 8.04–7.84 (m, 1H), 7.45–7.15 (m, 5H), 4.35–4.20 (m, 1H), 3.97 (s, 3H), 3.55–3.35 (m, 2H), 2.95 (dd,  $J$  = 17.0, 3.5 Hz, 1H), 2.72 (dd,  $J$  = 17.0, 9.0 Hz, 1H);  $^{13}\text{C}$  NMR (125 MHz,  $\text{CDCl}_3$ ):  $\delta$  161.2, 149.3, 148.9, 135.2, 131.4 (2C), 129.3, 128.2 (3C), 122.6, 120.5, 84.5, 84.3, 63.1, 57.7, 29.8, 22.3; IR (neat): 2934, 1673, 1568, 1421, 1308, 1244, 1019, 999, 756, 691  $\text{cm}^{-1}$ ; HRMS ( $m/z$ ) Calcd for ( $\text{C}_{18}\text{H}_{17}\text{N}_2\text{O}_2$ ) ( $[\text{M}+\text{H}]^+$ ): 293.1285; found: 293.1287.

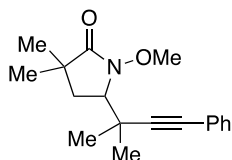

**1-Methoxy-3,3-dimethyl-5-(2-methyl-4-phenylbut-3-yn-2-yl)pyrrolidin-2-one (3oa).** Purification by column chromatography (25% EtOAc in hexanes) gave **3oa** as a yellow oil (70.5 mg, 82% yield);  $R_f$  = 0.45 (33% EtOAc in hexanes);  $^1\text{H}$  NMR (500 MHz,  $\text{CDCl}_3$ ):  $\delta$  7.40–7.30 (m, 2H), 7.30–7.20 (m, 3H), 3.84 (s, 3H), 3.61 (t,  $J$  = 8.5 Hz, 1H), 1.92 (dd,  $J$  = 13.0, 8.0 Hz, 1H), 1.79 (dd,  $J$  = 13.0, 9.0 Hz, 1H), 1.43 (s, 3H), 1.28 (s, 3H), 1.19 (s, 3H), 1.11 (s, 3H);  $^{13}\text{C}$  NMR (125 MHz,  $\text{CDCl}_3$ ):  $\delta$  177.0, 131.3, 128.1, 127.7, 123.1, 93.2, 82.6, 62.1, 60.9, 36.5, 35.7, 35.3, 26.3, 26.1, 25.3, 24.9; IR (neat): 2967, 2930, 2868, 1707, 1458, 1442, 1386, 1363, 1271, 1248, 1021, 929, 755, 691  $\text{cm}^{-1}$ ; HRMS ( $m/z$ ) Calcd for ( $\text{C}_{18}\text{H}_{24}\text{NO}_2$ ) ( $[\text{M}+\text{H}]^+$ ): 286.1802; found: 286.1801.

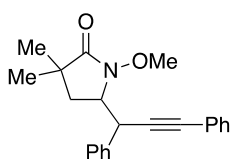

**5-(1,3-Diphenylprop-2-yn-1-yl)-1-methoxy-3,3-dimethylpyrrolidin-2-one (3pa).** The crude reaction mixture contains two diastereoisomers with d.r. = 2:1 detected by  $^1\text{H}$  NMR. Purification by column chromatography (33% EtOAc in hexanes) gave **3pa** as a mixture of two separable diastereoisomers (50.0 mg major and 20.5 mg minor from (*E*)-**1p**, 71% yield; 48.0 mg major and 22.2 mg minor from (*Z*)-**1p**, 70% yield). The relative stereochemistry was assigned by X-Ray (See section XI).

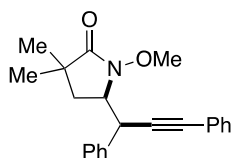

**Major diastereomer:** Yellow solid;  $R_f$  = 0.42 (33% EtOAc in hexanes);  $^1\text{H}$  NMR (500 MHz,  $\text{CDCl}_3$ ):  $\delta$  7.51–7.41 (m, 4H), 7.38 (t,  $J$  = 7.5 Hz, 2H), 7.36–7.27 (m, 4H), 4.64 (d,  $J$  = 4.0 Hz, 1H), 4.04 (s, 3H), 3.96–3.86 (m, 1H), 2.05 (dd,  $J$  = 13.0, 8.5 Hz, 1H), 1.55 (dd,  $J$  = 13.0, 7.0 Hz, 1H), 1.25 (s, 3H), 1.07 (s, 3H);  $^{13}\text{C}$  NMR (125 MHz,  $\text{CDCl}_3$ ):  $\delta$  176.5, 136.5, 131.6, 128.7, 128.3, 128.0, 127.5, 122.7, 87.2, 86.0, 63.5, 60.5, 40.2, 37.3, 33.6,

25.7, 25.2; IR (neat): 3059, 2963, 1710, 1286, 1030, 1017, 755, 691  $\text{cm}^{-1}$ ; HRMS ( $m/z$ ) Calcd for ( $\text{C}_{22}\text{H}_{24}\text{NO}_2$ ) ( $[\text{M}+\text{H}]^+$ ): 334.1802; found: 334.1800.

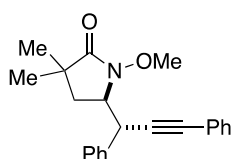

**Minor diastereomer:** Yellow solid;  $R_f$  = 0.26 (33% EtOAc in hexanes);  $^1\text{H}$  NMR (500 MHz,  $\text{CDCl}_3$ ):  $\delta$  7.55–7.42 (m, 4H), 7.42–7.28 (m, 6H), 4.23 (d,  $J$  = 3.5 Hz, 1H), 4.40–4.30 (m, 1H), 3.85 (s, 3H), 1.95 (dd,  $J$  = 13.5, 8.5 Hz, 1H), 1.71 (dd,  $J$  = 13.5, 6.0 Hz, 1H), 1.10 (s, 3H), 0.55 (s, 3H);  $^{13}\text{C}$  NMR (125 MHz,  $\text{CDCl}_3$ ):  $\delta$  174.7, 135.1,

131.6, 129.1, 128.4, 128.3, 128.2, 127.6, 122.9, 87.3, 85.1, 61.2, 57.3, 39.4, 36.5, 33.5, 26.7, 24.6; IR (neat): 3059, 2965, 1694, 1449, 1228, 1028, 1014, 757, 698  $\text{cm}^{-1}$ ; HRMS ( $m/z$ ) Calcd for ( $\text{C}_{22}\text{H}_{24}\text{NO}_2$ ) ( $[\text{M}+\text{H}]^+$ ): 334.1802; found: 334.1808.

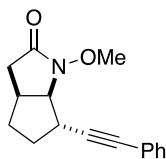

**1-Methoxy-6-(phenylethynyl)hexahydrocyclopenta[*b*]pyrrol-2(1*H*)-one (3qa).** Only one diastereomer was observed from the crude  $^1\text{H}$  NMR. Purification by column chromatography (20% EtOAc in hexanes) gave **3qa** as a yellow oil (45.3 mg, 60% yield);  $R_f = 0.13$  (33% EtOAc in hexanes);  $^1\text{H}$  NMR (400 MHz,  $\text{CDCl}_3$ ):  $\delta$  7.40–7.30 (m, 2H), 7.30–7.20 (m, 3H), 4.23 (d,  $J = 7.6$  Hz, 1H), 3.78 (s, 3H), 3.24–3.14 (m, 1H), 2.89–2.74 (m, 1H), 2.57 (dd,  $J = 17.6, 10.4$  Hz, 1H), 2.30–2.10 (m, 1H), 1.98 (dd,  $J = 17.6, 7.2$  Hz, 1H), 1.95–1.77 (m, 2H), 1.57–1.41 (m, 1H);  $^{13}\text{C}$  NMR (100 MHz,  $\text{CDCl}_3$ ):  $\delta$  168.8, 131.3, 128.0, 127.8, 122.9, 89.8, 82.2, 66.9, 61.8, 35.1, 34.4, 32.9, 31.7, 30.4; IR (neat): 2925, 2868, 1700, 1489, 1442, 1395, 1267, 1057, 961, 756, 691  $\text{cm}^{-1}$ ; HRMS ( $m/z$ ) Calcd for ( $\text{C}_{16}\text{H}_{18}\text{NO}_2$ ) ( $[\text{M}+\text{H}]^+$ ): 256.1332; found: 256.1333.

The relative stereochemistry was assigned on the basis of NOESY.

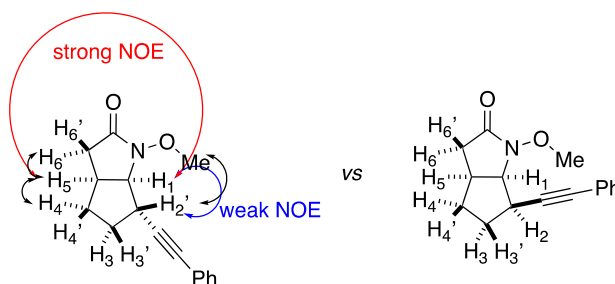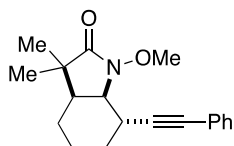

**1-Methoxy-3,3-dimethyl-7-(phenylethynyl)octahydro-2*H*-indol-2-one (3ra).** Only one diastereomer was observed from the crude  $^1\text{H}$  NMR. Purification by column chromatography (25% EtOAc in hexanes) gave **3ra** as a yellow oil (82.1 mg, 92% yield);  $R_f = 0.56$  (33% EtOAc in hexanes);  $^1\text{H}$  NMR (500 MHz,  $\text{CDCl}_3$ ):  $\delta$  7.50–7.35 (m, 2H), 7.35–7.20 (m, 3H), 3.93–3.86 (m, 1H), 3.82 (s, 3H), 3.42–3.32 (m, 1H), 2.14–2.02 (m, 1H), 1.90–1.50 (m, 5H), 1.35–1.20 (m, 1H), 1.12 (s, 3H), 1.10 (s, 3H);  $^{13}\text{C}$  NMR (125 MHz,  $\text{CDCl}_3$ ):  $\delta$  177.8, 131.5, 128.1, 127.8, 123.2, 90.0, 82.4, 62.3, 58.0, 42.5, 38.3, 27.8, 25.6, 24.5, 23.4, 19.7, 18.6; IR (neat): 2934, 2861, 1714, 1489, 1442, 1386, 1233, 1023, 756, 691  $\text{cm}^{-1}$ ; HRMS ( $m/z$ ) Calcd for ( $\text{C}_{19}\text{H}_{24}\text{NO}_2$ ) ( $[\text{M}+\text{H}]^+$ ): 298.1802; found: 298.1803.

The relative stereochemistry was assigned on the basis of NOESY.

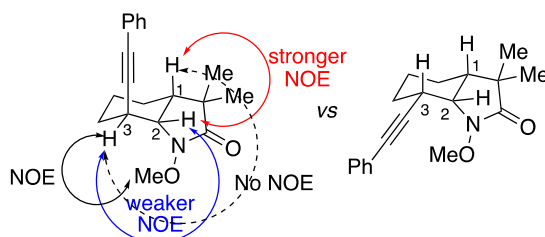

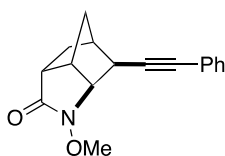

**1-Methoxy-6-(phenylethynyl)hexahydro-3,5-methanocyclopenta[*b*]pyrrol-2(1*H*)-one (3sa).** Only one diastereomer was observed from the crude  $^1\text{H}$  NMR. Purification by column chromatography (33% EtOAc in hexanes) gave **3sa** as a yellow oil (51.9 mg, 65% yield);  $R_f$  = 0.22 (33% EtOAc in hexanes);  $^1\text{H}$  NMR (500 MHz,  $\text{CDCl}_3$ ):  $\delta$  7.42–7.32 (m, 2H), 7.32–7.20 (m, 3H), 3.93 (d,  $J$  = 4.5 Hz, 1H), 3.78 (s, 3H), 2.96–2.86 (m, 1H), 2.67 (s, 1H), 2.57 (s, 1H), 2.41 (dd,  $J$  = 11.0, 4.0 Hz, 1H), 2.09 (d,  $J$  = 11.0 Hz, 1H), 2.00–1.90 (m, 1H), 1.65 (d,  $J$  = 13.0 Hz, 1H), 1.55 (d,  $J$  = 10.5 Hz, 1H);  $^{13}\text{C}$  NMR (125 MHz,  $\text{CDCl}_3$ ):  $\delta$  176.3, 131.3, 128.1, 127.8, 123.0, 90.1, 82.7, 65.0, 62.7, 43.9, 40.4, 38.9, 37.3, 35.0, 34.7; IR (neat): 2965, 2874, 1720, 1489, 1441, 1227, 1058, 1002, 756, 691  $\text{cm}^{-1}$ ; HRMS ( $m/z$ ) Calcd for ( $\text{C}_{17}\text{H}_{18}\text{NO}_2$ ) ( $[\text{M}+\text{H}]^+$ ): 268.1332; found: 268.1329.

The relative stereochemistry was assigned on the basis of NOESY.

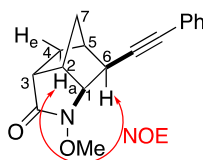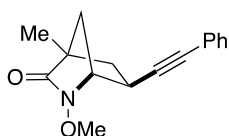

**2-Methoxy-4-methyl-6-(phenylethynyl)-2-azabicyclo[2.2.1]heptan-3-one (3ta).** The crude reaction mixture contains two diastereoisomers with d.r. = 5:1 detected by  $^1\text{H}$  NMR. Purification by column chromatography (33% EtOAc in hexanes) gave **3ta** as a mixture of two separable diastereoisomers (29.8 mg major and 6.8 mg minor, 48% yield).

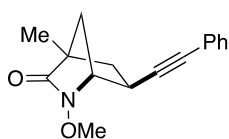

**Major diastereomer:** Yellow solid;  $R_f$  = 0.56 (33% EtOAc in hexanes);  $^1\text{H}$  NMR (500 MHz,  $\text{CDCl}_3$ ):  $\delta$  7.45–7.35 (m, 2H), 7.35–7.25 (m, 3H), 4.05 (s, 1H), 3.81 (s, 3H), 3.26–3.16 (m, 1H), 2.08–1.97 (m, 1H), 1.93 (d,  $J$  = 10.0 Hz, 1H), 1.82 (dd,  $J$  = 12.5, 5.0 Hz, 1H), 1.70 (d,  $J$  = 10.0 Hz, 1H), 1.33 (s, 3H);  $^{13}\text{C}$  NMR (125 MHz,  $\text{CDCl}_3$ ):  $\delta$  179.3, 131.5, 128.2, 128.0, 123.0, 90.2, 81.9, 64.2, 63.4, 50.0, 41.8, 38.2, 30.5, 14.1; IR (neat): 2963, 2929, 1727, 1490, 1440, 1241, 1212, 1026, 763, 752, 694  $\text{cm}^{-1}$ ; HRMS ( $m/z$ ) Calcd for ( $\text{C}_{16}\text{H}_{18}\text{NO}_2$ ) ( $[\text{M}+\text{H}]^+$ ): 256.1332; found: 256.1328.

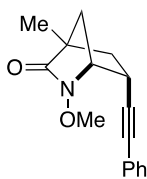

**Minor diastereomer:** Yellow solid;  $R_f$  = 0.28 (33% EtOAc in hexanes);  $^1\text{H}$  NMR (500 MHz,  $\text{CDCl}_3$ ):  $\delta$  7.43–7.33 (m, 2H), 7.33–7.22 (m, 3H), 4.20 (s, 1H), 3.84 (s, 3H), 3.35–3.25 (m, 1H), 2.18–2.07 (m, 1H), 1.81–1.71 (m, 1H), 1.71 (d,  $J$  = 9.5 Hz, 1H), 1.52 (d,  $J$  = 9.5 Hz, 1H), 1.33 (s, 3H);  $^{13}\text{C}$  NMR (125 MHz,  $\text{CDCl}_3$ ):  $\delta$  175.6, 131.5, 128.0, 127.7, 123.4, 89.2, 82.4, 63.6, 62.9, 50.0, 42.8, 40.4, 33.7, 14.7; IR (neat): 2958, 2945, 2868, 1719, 1490, 1441, 1363, 1254, 1021, 755, 748, 690  $\text{cm}^{-1}$ ; HRMS ( $m/z$ ) Calcd for ( $\text{C}_{16}\text{H}_{18}\text{NO}_2$ ) ( $[\text{M}+\text{H}]^+$ ): 256.1332; found: 256.1336.

Stereochemistry was assigned on the basis of NOESY.

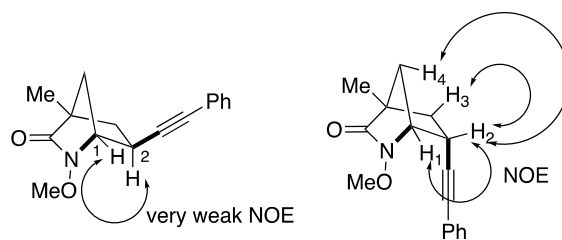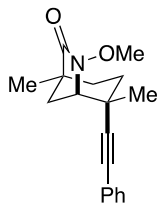

**6-Methoxy-1,4-dimethyl-4-(phenylethynyl)-6-azabicyclo[3.2.1]octan-7-one (3ua).** The crude reaction mixture contains two diastereoisomers with d.r. = 2:1 detected by  $^1\text{H}$  NMR. Purification by column chromatography (33% EtOAc in hexanes) gave **3ua** as a mixture of two separable diastereoisomers (43.4 mg major and 21.2 mg minor, 76% yield).

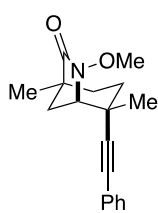

**Major diastereomer:** Yellow oil;  $R_f$  = 0.49 (33% EtOAc in hexanes);  $^1\text{H}$  NMR (500 MHz,  $\text{CDCl}_3$ ):  $\delta$  7.44–7.34 (m, 2H), 7.34–7.23 (m, 3H), 3.79 (d,  $J$  = 5.5 Hz, 1H), 3.77 (s, 3H), 2.39 (d,  $J$  = 11.0 Hz, 1H), 1.97–1.87 (m, 1H), 1.87–1.76 (m, 1H), 1.71–1.53 (m, 3H), 1.46 (s, 3H), 1.11 (s, 3H);  $^{13}\text{C}$  NMR (125 MHz,  $\text{CDCl}_3$ ):  $\delta$  174.3, 131.3, 128.1, 127.8, 123.0, 93.9, 82.7, 62.6, 61.2, 40.8, 38.8, 34.7, 33.7, 31.8, 27.1, 20.1; IR (neat): 2933, 2868, 1716, 1489, 1453, 1377, 1021, 754, 691  $\text{cm}^{-1}$ ; HRMS ( $m/z$ ) Calcd for ( $\text{C}_{18}\text{H}_{22}\text{NO}_2$ ) ( $[\text{M}+\text{H}]^+$ ): 284.1645; found: 284.1648.

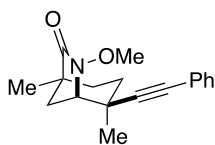

**Minor diastereomer:** Yellow oil;  $R_f$  = 0.32 (33% EtOAc in hexanes);  $^1\text{H}$  NMR (500 MHz,  $\text{CDCl}_3$ ):  $\delta$  7.42–7.32 (m, 2H), 7.31–7.20 (m, 3H), 3.90 (d,  $J$  = 5.0 Hz, 1H), 3.83 (s, 3H), 1.97 (td,  $J$  = 14.0, 6.0 Hz, 1H), 1.91 (d,  $J$  = 11.5 Hz, 1H), 1.79 (dd,  $J$  = 15.0, 5.5 Hz, 1H), 1.77–1.69 (m, 1H), 1.62 (dd,  $J$  = 13.0, 5.5 Hz, 1H), 1.46 (dd,  $J$  = 13.0, 5.5 Hz, 1H), 1.42 (s, 3H), 1.12 (s, 3H);  $^{13}\text{C}$  NMR (125 MHz,  $\text{CDCl}_3$ ):  $\delta$  174.5, 131.3, 128.0, 127.6, 123.6, 95.3, 81.1, 62.0, 61.8, 40.8, 35.2, 32.0, 31.3, 30.5, 24.4, 20.3; IR (neat): 2930, 2870, 1714, 1489, 1442, 1378, 1258, 1229, 1026, 756, 691  $\text{cm}^{-1}$ ; HRMS ( $m/z$ ) Calcd for ( $\text{C}_{18}\text{H}_{22}\text{NO}_2$ ) ( $[\text{M}+\text{H}]^+$ ): 284.1645; found: 284.1646.

Stereochemistry was assigned on the basis of NOESY.

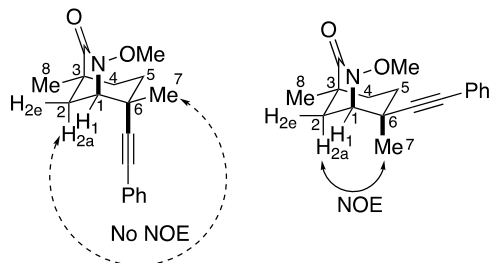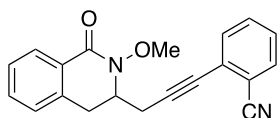

**2-(3-(2-Methoxy-1-oxo-1,2,3,4-tetrahydroisoquinolin-3-yl)prop-1-yn-1-yl)benzonitrile (31b).** Purification by column chromatography (20% EtOAc in hexanes) gave **31b** as a yellow oil (67.3 mg, 71% yield);  $R_f$  = 0.32 (33% EtOAc in hexanes);  $^1\text{H}$  NMR (400 MHz,  $\text{CDCl}_3$ ):  $\delta$  8.09 (d,  $J$  = 7.5 Hz, 1H), 7.65–

7.57 (m, 1H), 7.54–7.40 (m, 3H), 7.40–7.25 (m, 3H), 4.27–4.25 (m, 1H), 3.93 (s, 3H), 3.57–3.40 (m, 2H), 3.05 (dd,  $J = 16.8, 3.2$  Hz, 1H), 2.68 (dd,  $J = 16.8, 9.6$  Hz, 1H);  $^{13}\text{C}$  NMR (100 MHz,  $\text{CDCl}_3$ ):  $\delta$  163.3, 135.2, 132.6, 132.4, 132.3, 132.1, 128.2, 128.1, 127.99, 127.95, 127.1, 127.0, 117.7, 115.3, 92.7, 79.7, 63.0, 57.7, 32.4, 21.7; IR (neat): 2933, 2226, 1668, 1481, 1459, 1424, 1278, 1241, 1020, 996, 762, 740, 723, 685  $\text{cm}^{-1}$ ; HRMS (m/z) Calcd for ( $\text{C}_{20}\text{H}_{17}\text{N}_2\text{O}_2$ ) ( $[\text{M}+\text{H}]^+$ ): 317.1285; found: 317.1291.

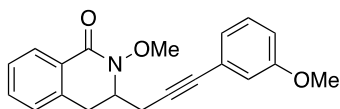

**2-Methoxy-3-(3-(3-methoxyphenyl)prop-2-yn-1-yl)-3,4-dihydroisoquinolin-1(2H)-one (3lc).** Purification by column chromatography (20% EtOAc in hexanes) gave **3lc** as a yellow oil (72.2 mg, 75% yield);  $R_f = 0.40$  (33% EtOAc in hexanes);  $^1\text{H}$  NMR (400 MHz,  $\text{CDCl}_3$ ):  $\delta$  7.95 (d,  $J = 8.0$  Hz, 1H), 7.29 (t,  $J = 7.5$  Hz, 1H), 7.17 (t,  $J = 7.5$  Hz, 1H), 7.06 (d,  $J = 7.5$  Hz, 1H), 7.01 (t,  $J = 7.5$  Hz, 1H), 6.78 (d,  $J = 7.5$  Hz, 1H), 6.73–6.63 (m, 2H), 4.07–3.97 (m, 1H), 3.78 (s, 3H), 3.60 (s, 3H), 3.35–3.15 (m, 2H), 2.80 (d,  $J = 16.8$  Hz, 1H), 2.50 (dd,  $J = 16.8, 9.6$  Hz, 1H);  $^{13}\text{C}$  NMR (100 MHz,  $\text{CDCl}_3$ ):  $\delta$  163.3, 159.1, 135.2, 132.5, 129.2, 128.0, 127.9, 127.1, 124.0, 116.4, 114.4, 85.1, 83.3, 63.0, 57.9, 55.1, 32.6, 21.8; IR (neat): 2934, 2833, 1670, 1603, 1573, 1480, 1459, 1423, 1286, 1250, 1201, 1163, 1040, 1022, 999, 854, 782, 740, 685  $\text{cm}^{-1}$ ; HRMS (m/z) Calcd for ( $\text{C}_{20}\text{H}_{20}\text{NO}_3$ ) ( $[\text{M}+\text{H}]^+$ ): 322.1438; found: 322.1438.

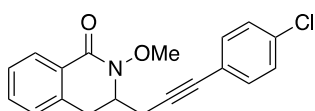

**3-(3-(4-Chlorophenyl)prop-2-yn-1-yl)-2-methoxy-3,4-dihydroisoquinolin-1(2H)-one (3ld).** Purification by column chromatography (20% EtOAc in hexanes) gave **3ld** as a yellow oil (71.2 mg, 73% yield);  $R_f = 0.40$  (33% EtOAc in hexanes);  $^1\text{H}$  NMR (400 MHz,  $\text{CDCl}_3$ ):  $\delta$  8.10 (d,  $J = 8.0$  Hz, 1H), 7.45 (t,  $J = 7.5$  Hz, 1H), 7.33 (t,  $J = 7.5$  Hz, 1H), 7.30–7.15 (m, 5H), 4.23–4.07 (m, 1H), 3.93 (s, 3H), 3.43 (dd,  $J = 16.4, 5.6$  Hz, 1H), 3.33 (dd,  $J = 16.4, 4.4$  Hz, 1H), 2.94 (dd,  $J = 16.8, 3.2$  Hz, 1H), 2.68 (dd,  $J = 16.8, 9.2$  Hz, 1H);  $^{13}\text{C}$  NMR (100 MHz,  $\text{CDCl}_3$ ):  $\delta$  163.4, 135.2, 134.0, 132.7 (2C), 132.5, 128.5 (2C), 128.1 (2C), 127.9, 127.1, 121.5, 86.4, 82.4, 63.0, 57.8, 32.8, 21.9; IR (neat): 2933, 1667, 1604, 1488, 1459, 1423, 1396, 1276, 1242, 1088, 1013, 826, 737, 720, 688  $\text{cm}^{-1}$ ; HRMS (m/z) Calcd for ( $\text{C}_{19}\text{H}_{17}\text{ClNO}_2$ ) ( $[\text{M}+\text{H}]^+$ ): 326.0942; found: 326.0941.

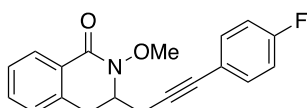

**3-(3-(4-Fluorophenyl)prop-2-yn-1-yl)-2-methoxy-3,4-dihydroisoquinolin-1(2H)-one (3le).** Purification by column chromatography (25% EtOAc in hexanes) gave **3le** as a yellow oil (63.0 mg, 68% yield);  $R_f = 0.40$  (33% EtOAc in hexanes);  $^1\text{H}$  NMR (500 MHz,  $\text{CDCl}_3$ ):  $\delta$  8.12 (d,  $J = 7.5$  Hz, 1H), 7.47 (t,  $J = 7.5$  Hz, 1H), 7.35 (t,  $J = 7.5$  Hz, 1H), 7.32 (d,  $J = 8.0$  Hz, 1H), 7.31 (d,  $J = 8.0$  Hz, 1H), 7.24 (d,  $J = 7.5$  Hz, 1H), 6.97 (t,  $J = 8.5$  Hz, 2H), 4.23–4.13 (m, 1H), 3.96 (s, 3H), 3.45 (dd,  $J = 16.0, 6.0$  Hz, 1H), 3.37 (dd,  $J = 16.0, 4.0$  Hz, 1H), 2.94 (dd,  $J = 17.0, 3.0$  Hz, 1H), 2.69 (dd,  $J = 17.0, 9.0$  Hz, 1H);  $^{13}\text{C}$  NMR (125 MHz,  $\text{CDCl}_3$ ):  $\delta$  163.4, 162.2 (d,  $J = 246.2$  Hz, 1C), 135.3, 133.3 (d,  $J = 8.8$  Hz, 2C), 132.5, 128.1, 128.0, 127.9, 127.1, 119.1 (d,  $J = 2.5$  Hz, 1C), 115.4 (d,  $J = 22.5$  Hz, 2C), 85.0, 82.4, 63.0, 57.9, 32.7, 21.8; IR (neat): 2928, 1670,

1600, 1505, 1459, 1425, 1276, 1218, 1154, 1092, 1021, 997, 834, 725, 689  $\text{cm}^{-1}$ ; HRMS ( $m/z$ ) Calcd for ( $\text{C}_{19}\text{H}_{17}\text{FNO}_2$ ) ( $[\text{M}+\text{H}]^+$ ): 310.1238; found: 310.1236.

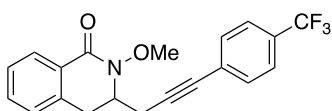

**2-Methoxy-3-(3-(4-(trifluoromethyl)phenyl)prop-2-yn-1-yl)-3,4-dihydroisoquinolin-1(2H)-one (3lf).**

Purification by column chromatography (25% EtOAc in hexanes) gave **3lf** as a yellow oil (81.6 mg, 76% yield);  $R_f = 0.40$  (33% EtOAc in hexanes);  $^1\text{H}$  NMR (500 MHz,  $\text{CDCl}_3$ ):  $\delta$  8.13 (d,  $J = 8.0$  Hz, 1H), 7.54 (d,  $J = 8.0$  Hz, 2H), 7.48 (t,  $J = 7.0$  Hz, 1H), 7.43 (d,  $J = 8.0$  Hz, 2H), 7.36 (t,  $J = 7.5$  Hz, 1H), 7.25 (d,  $J = 7.5$  Hz, 1H), 4.25–4.17 (m, 1H), 3.97 (s, 3H), 3.48 (dd,  $J = 16.5, 6.0$  Hz, 1H), 3.36 (dd,  $J = 16.5, 4.0$  Hz, 1H), 2.98 (dd,  $J = 17.0, 3.5$  Hz, 1H), 2.74 (dd,  $J = 17.0, 9.5$  Hz, 1H);  $^{13}\text{C}$  NMR (125 MHz,  $\text{CDCl}_3$ , one carbon missing):  $\delta$  163.4, 135.2, 132.6, 131.7 (2C), 129.7 (q,  $J = 32.5$  Hz, 1C), 128.1, 127.9, 127.2, 126.8, 125.1 (q,  $J = 2.5$  Hz, 2C), 123.8 (q,  $J = 270.0$  Hz, 1C), 88.1, 82.3, 63.0, 57.7, 32.8, 22.0; IR (neat): 2935, 1672, 1613, 1459, 1403, 1320, 1163, 1119, 1104, 1065, 1016, 840, 730, 688  $\text{cm}^{-1}$ ; HRMS ( $m/z$ ) Calcd for ( $\text{C}_{20}\text{H}_{17}\text{F}_3\text{NO}_2$ ) ( $[\text{M}+\text{H}]^+$ ): 360.1206; found: 360.1201.

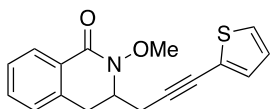

**2-Methoxy-3-(3-(thiophen-2-yl)prop-2-yn-1-yl)-3,4-dihydroisoquinolin-1(2H)-one (3lg).** Purification by column chromatography (20% EtOAc in hexanes) gave **3lg** as a yellow oil (65.4 mg, 73% yield);  $R_f = 0.46$  (33% EtOAc in hexanes);  $^1\text{H}$  NMR (500 MHz,  $\text{CDCl}_3$ ):  $\delta$  8.14 (d,  $J = 8.0$  Hz, 1H), 7.48 (t,  $J = 7.5$  Hz, 1H), 7.37 (t,  $J = 7.5$  Hz, 1H), 7.26 (d,  $J = 8.0$  Hz, 1H), 7.21 (d,  $J = 4.5$  Hz, 1H), 7.15–7.10 (m, 1H), 7.00–6.90 (m, 1H), 4.25–4.15 (m, 1H), 3.96 (s, 3H), 3.45 (dd,  $J = 16.5, 5.5$  Hz, 1H), 3.37 (dd,  $J = 16.5, 4.5$  Hz, 1H), 3.00 (d,  $J = 16.5, 1\text{H}$ ), 2.70 (dd,  $J = 16.5, 9.5$  Hz, 1H);  $^{13}\text{C}$  NMR (125 MHz,  $\text{CDCl}_3$ ):  $\delta$  163.4, 135.2, 132.6, 131.6, 128.1, 128.09, 128.02, 127.2, 126.8, 126.5, 123.0, 89.4, 76.6, 63.1, 57.9, 32.7, 22.1; IR (neat): 2932, 2897, 1668, 1605, 1459, 1424, 1298, 1238, 1017, 997, 738, 690  $\text{cm}^{-1}$ ; HRMS ( $m/z$ ) Calcd for ( $\text{C}_{17}\text{H}_{16}\text{NO}_2\text{S}$ ) ( $[\text{M}+\text{H}]^+$ ): 298.0896; found: 298.0898.

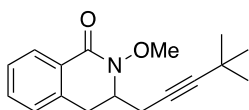

**3-(4,4-Dimethylpent-2-yn-1-yl)-2-methoxy-3,4-dihydroisoquinolin-1(2H)-one (3lh).** Purification by column chromatography (25% EtOAc in hexanes) gave **3lh** as a yellow oil (38.8 mg, 48% yield);  $R_f = 0.60$  (33% EtOAc in hexanes);  $^1\text{H}$  NMR (500 MHz,  $\text{CDCl}_3$ ):  $\delta$  8.07 (d,  $J = 7.5$  Hz, 1H), 7.42 (t,  $J = 7.5$  Hz, 1H), 7.31 (t,  $J = 7.5$  Hz, 1H), 7.18 (d,  $J = 7.5$  Hz, 1H), 4.05–3.95 (m, 1H), 3.89 (s, 3H), 3.32 (dd,  $J = 16.5, 6.0$  Hz, 1H), 3.27 (dd,  $J = 16.5, 4.5$  Hz, 1H), 2.65 (dd,  $J = 16.5, 3.0$  Hz, 1H), 2.40 (dd,  $J = 16.5, 9.0$  Hz, 1H), 1.12 (s, 9H);  $^{13}\text{C}$  NMR (125 MHz,  $\text{CDCl}_3$ ):  $\delta$  163.3, 135.5, 132.3, 128.1, 127.9, 127.8, 126.9, 92.1, 73.7, 62.9, 58.0, 32.4, 30.9, 27.2, 21.1; IR (neat): 2966, 1672, 1606, 1459, 1427, 1263, 1241, 1012, 740, 726, 690  $\text{cm}^{-1}$ ; HRMS ( $m/z$ ) Calcd for ( $\text{C}_{17}\text{H}_{22}\text{NO}_2$ ) ( $[\text{M}+\text{H}]^+$ ): 272.1645; found: 272.1647.

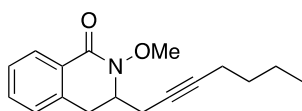

**3-(Hept-2-yn-1-yl)-2-methoxy-3,4-dihydroisoquinolin-1(2H)-one (3li).** Purification by column chromatography (25% EtOAc in hexanes) gave **3li** as a yellow oil (30.3 mg, 37% yield);  $R_f = 0.60$  (33% EtOAc in hexanes);  $^1\text{H NMR}$  (500 MHz,  $\text{CDCl}_3$ ):  $\delta$  8.10 (d,  $J = 8.0$  Hz, 1H), 7.45 (t,  $J = 8.0$  Hz, 1H), 7.34 (t,  $J = 7.5$  Hz, 1H), 7.21 (d,  $J = 7.5$  Hz, 1H), 4.07–3.97 (m, 1H), 3.91 (s, 3H), 3.41–3.25 (m, 2H), 2.71 (d,  $J = 16.5$  Hz, 1H), 2.39 (dd,  $J = 16.5, 9.5$  Hz, 1H), 2.11 (t,  $J = 7.0$  Hz, 2H), 1.50–1.30 (m, 4H), 0.90 (t,  $J = 7.0$  Hz, 3H);  $^{13}\text{C NMR}$  (125 MHz,  $\text{CDCl}_3$ ):  $\delta$  163.4, 135.5, 132.4, 128.1, 128.0, 127.9, 127.0, 83.6, 75.4, 63.0, 58.2, 32.6, 30.9, 21.9, 21.2, 18.3, 13.5; IR (neat): 2930, 2870, 1672, 1605, 1459, 1428, 1273, 1241, 1014, 998, 737, 688  $\text{cm}^{-1}$ ; HRMS ( $m/z$ ) Calcd for ( $\text{C}_{17}\text{H}_{22}\text{NO}_2$ ) ( $[\text{M}+\text{H}]^+$ ): 272.1645; found: 272.1646.

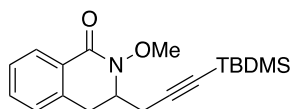

**3-(3-(Tert-butyldimethylsilyl)prop-2-yn-1-yl)-2-methoxy-3,4-dihydroisoquinolin-1(2H)-one (3lj).** Purification by column chromatography (10% EtOAc in hexanes) gave **3lj** as a yellow oil (45.8 mg, 46% yield);  $R_f = 0.68$  (33% EtOAc in hexanes);  $^1\text{H NMR}$  (500 MHz,  $\text{CDCl}_3$ ):  $\delta$  8.10 (d,  $J = 7.5$  Hz, 1H), 7.45 (t,  $J = 7.5$  Hz, 1H), 7.34 (t,  $J = 7.5$  Hz, 1H), 7.20 (d,  $J = 7.5$  Hz, 1H), 4.16–4.02 (m, 1H), 3.91 (s, 3H), 3.49–3.28 (m, 2H), 2.79 (dd,  $J = 17.0, 3.0$  Hz, 1H), 2.45 (dd,  $J = 17.0, 10.0$  Hz, 1H), 0.91 (s, 9H), 0.06 (s, 6H);  $^{13}\text{C NMR}$  (125 MHz,  $\text{CDCl}_3$ ):  $\delta$  163.4, 135.2, 132.5, 128.1, 128.0, 127.9, 127.1, 102.7, 86.2, 63.0, 57.9, 32.4, 26.0, 22.1, 16.4, 4.6; IR (neat): 2927, 2855, 2174, 1678, 1606, 1460, 1426, 1248, 1015, 823, 773, 680  $\text{cm}^{-1}$ ; HRMS ( $m/z$ ) Calcd for ( $\text{C}_{19}\text{H}_{28}\text{NO}_2\text{Si}$ ) ( $[\text{M}+\text{H}]^+$ ): 330.1884; found: 330.1886.

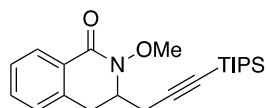

**2-Methoxy-3-(3-(triisopropylsilyl)prop-2-yn-1-yl)-3,4-dihydroisoquinolin-1(2H)-one (3lk).** Purification by column chromatography (10% EtOAc in hexanes) gave **3lk** as a white solid (40.1 mg, 36% yield);  $R_f = 0.48$  (25% EtOAc in hexanes);  $^1\text{H NMR}$  (500 MHz,  $\text{CDCl}_3$ ):  $\delta$  8.11 (d,  $J = 7.5$  Hz, 1H), 7.45 (t,  $J = 7.5$  Hz, 1H), 7.35 (t,  $J = 7.5$  Hz, 1H), 7.19 (d,  $J = 7.5$  Hz, 1H), 4.16–4.02 (m, 1H), 3.92 (s, 3H), 3.47–3.31 (m, 2H), 2.84 (d,  $J = 17.0$  Hz, 1H), 2.45 (dd,  $J = 17.0, 10.0$  Hz, 1H), 1.05 (s, 21H);  $^{13}\text{C NMR}$  (125 MHz,  $\text{CDCl}_3$ ):  $\delta$  163.4, 135.3, 132.5, 128.18, 128.11, 127.9, 127.1, 103.8, 84.1, 63.1, 58.2, 32.4, 22.2, 18.6, 11.2; IR (neat): 2940, 2862, 2171, 1681, 1459, 1240, 1015, 995, 881, 676, 660  $\text{cm}^{-1}$ ; HRMS ( $m/z$ ) Calcd for ( $\text{C}_{22}\text{H}_{34}\text{NO}_2\text{Si}$ ) ( $[\text{M}+\text{H}]^+$ ): 372.2353; found: 372.2359.

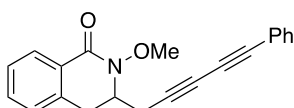

**2-Methoxy-3-(5-phenylpenta-2,4-diyne-1-yl)-3,4-dihydroisoquinolin-1(2H)-one (3ll).** Purification by column chromatography (20% EtOAc in hexanes) gave **3ll** as a yellow oil (52.0 mg, 55% yield);  $R_f = 0.48$  (33% EtOAc in hexanes);  $^1\text{H NMR}$  (400 MHz,  $\text{CDCl}_3$ ):  $\delta$  8.09 (d,  $J = 8.0$  Hz, 1H), 7.55–7.38 (m, 3H), 7.38–7.17 (m, 5H), 4.20–4.05 (m, 1H), 3.91 (s, 3H), 3.39 (dd,  $J = 16.4, 5.6$  Hz, 1H), 3.32 (dd,  $J = 16.4, 4.4$  Hz,



1H), 2.91 (dd,  $J = 17.2, 3.6$  Hz, 1H), 2.57 (dd,  $J = 17.2, 5.6$  Hz, 1H);  $^{13}\text{C}$  NMR (100 MHz,  $\text{CDCl}_3$ ):  $\delta$  163.4, 135.0, 132.6, 132.4, 129.1, 128.3, 128.1, 128.0, 127.8, 127.2, 121.4, 79.5, 75.7, 73.6, 67.8, 63.1, 57.7, 32.6, 21.8; IR (neat): 2934, 1670, 1604, 1459, 1422, 1290, 1241, 1015, 996, 739, 687  $\text{cm}^{-1}$ ; HRMS ( $m/z$ ) Calcd for  $(\text{C}_{21}\text{H}_{18}\text{NO}_2)$  ( $[\text{M}+\text{H}]^+$ ): 316.1332; found: 316.1333.

## VI. Mechanism Investigation.

### 1. Radical Trapping Experiments.

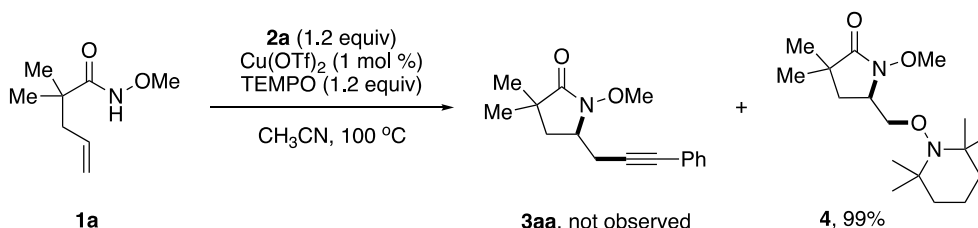

To a reaction tube charged with *N*-methoxy-2,2-diphenylpent-4-enamide **1a** (31.4 mg, 0.2 mmol, 1.0 equiv) and hypervalent iodine reagent **2a** (83.6 mg, 0.24 mmol, 1.2 equiv), was added  $\text{Cu}(\text{OTf})_2$  (0.72 mg, 0.002 mmol, 1 mol%), TEMPO (37.5 mg, 0.24 mmol, 1.2 equiv) and  $\text{CH}_3\text{CN}$  (2 mL). The reaction tube was capped and the resulting mixture was stirred at  $100\text{ }^\circ\text{C}$  for 12 h. After cooling down to room temperature, the reaction mixture was filtered through a pad of  $\text{Al}_2\text{O}_3$  and washed with EtOAc (15 mL). The filtrate was concentrated *in vacuo*. Aminoalkynylation product **3a** was not observed from the crude  $^1\text{H}$  NMR. The resulting crude mixture was subject to flash column chromatography to provide amino-oxygenation product **4** as a colorless oil (61.9 mg, 99% yield);  $R_f = 0.25$  (12.5% EtOAc in hexanes);  $^1\text{H}$  NMR (400 MHz,  $\text{CDCl}_3$ ):  $\delta$  3.95–3.83 (m, 2H), 3.82–3.75 (m, 1H), 3.76 (s, 3H), 1.95 (dd,  $J = 12.8, 7.2$  Hz, 1H), 1.73 (dd,  $J = 12.8, 7.6$  Hz, 1H), 1.59–1.33 (m, 5H), 1.33–1.22 (m, 1H), 1.18 (s, 3H), 1.13 (s, br, 6H), 1.10 (s, 3H), 1.06 (s, 3H), 1.05 (s, 3H);  $^{13}\text{C}$  NMR (100 MHz,  $\text{CDCl}_3$ ):  $\delta$  175.7, 76.5, 62.0, 59.9, 53.1, 39.6, 37.2, 35.4, 32.9, 25.5, 25.0, 20.1, 20.0, 16.9; IR (neat): 2969, 2929, 2869, 1711, 1453, 1373, 1359, 1261, 1243, 1132, 1039, 1024, 929, 794, 745, 556  $\text{cm}^{-1}$ ; HRMS ( $m/z$ ) Calcd for  $(\text{C}_{17}\text{H}_{33}\text{N}_2\text{O}_3)$  ( $[\text{M}+\text{H}]^+$ ): 313.2489; found: 313.2485.

### 2. Deuterium-Labeling Experiments.

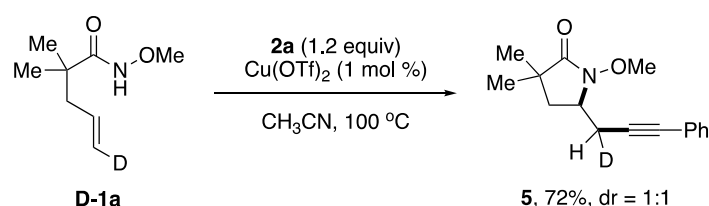

To a reaction tube charged with (*E*)-*N*-methoxy-2,2-dimethylpent-4-en-5-*d*-amide **D-1a** (47.4 mg, 0.3 mmol, 1.0 equiv) and hypervalent iodine reagent **2a** (125.3 mg, 0.36 mmol, 1.2 equiv), was added  $\text{Cu}(\text{OTf})_2$  (1.08 mg, 0.003 mmol, 1 mol%) and  $\text{CH}_3\text{CN}$  (1.5 mL). The reaction tube was capped and the resulting mixture was stirred at  $100\text{ }^\circ\text{C}$  for 12 h. After cooling down to room temperature, the reaction mixture was filtered through a pad of  $\text{Al}_2\text{O}_3$  and washed with EtOAc (15 mL). The filtrate was concentrated *in vacuo*. The resulting crude mixture was subject to flash column chromatography (33% EtOAc in hexanes) to provide the aminoalkynylation product **6** as a yellow oil (55.4 mg, 72% yield, inseparable diastereoisomer,  $dr = 1:1$ );  $R_f = 0.30$  (33% EtOAc in hexanes);  $^1\text{H}$  NMR (500 MHz,  $\text{CDCl}_3$ ):  $\delta$  7.50–7.35 (m, 2H), 7.35–7.22 (m, 3H),

3.90 (s, 3H), 3.92–2.82 (m, 1H), 2.81 (s, br, 0.5 H), 2.78 (d,  $J = 4.5$  Hz, 0.5H), 2.06 (dd,  $J = 12.5, 7.5$  Hz, 1H), 1.93–1.80 (m, 1H), 1.25 (s, 3H), 1.16 (s, 3H);  $^{13}\text{C}$  NMR (125 MHz,  $\text{CDCl}_3$ ):  $\delta$  176.2, 131.4, 128.2, 128.0, 123.0, 84.3, 83.6, 63.0, 53.8, 37.4, 37.2, 25.7, 25.0, 23.4 (t,  $J = 18.9$  Hz); IR (neat): 2963, 2931, 2868, 1706, 1441, 1361, 1259, 1015, 755, 691  $\text{cm}^{-1}$ ; HRMS ( $m/z$ ) Calcd for ( $\text{C}_{16}\text{H}_{29}\text{NO}_2$ ) ( $[\text{M}+\text{H}]^+$ ): 259.1551; found: 259.1551.

### 3. Radical Clock Experiments.

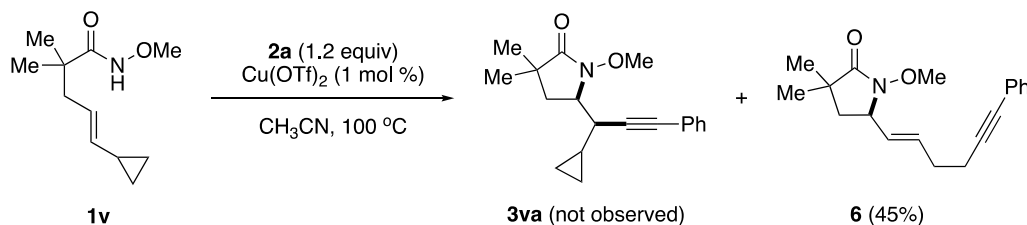

To a reaction tube charged with *N*-methoxy-2,2-diphenylpent-4-enamide **1v** (59.1 mg, 0.3 mmol, 1.0 equiv) and hypervalent iodine reagent **2a** (125.3 mg, 0.36 mmol, 1.2 equiv), was added  $\text{Cu}(\text{OTf})_2$  (1.08 mg, 0.003 mmol, 1 mol%) and  $\text{CH}_3\text{CN}$  (1.5 mL). The reaction tube was capped and the resulting mixture was stirred at  $100\text{ }^\circ\text{C}$  for 5 h. After cooling down to room temperature, the reaction mixture was filtered through a pad of  $\text{Al}_2\text{O}_3$  and washed with EtOAc (15 mL). The filtrate was concentrated *in vacuo*. Aminoalkynylation product **3va** was not observed from the crude  $^1\text{H}$  NMR. The resulting crude mixture was subject to flash column chromatography to provide cyclopropane ring opening product **5** as a yellow oil (40.1 mg, 45% yield);  $R_f = 0.14$  (25% EtOAc in hexanes);  $^1\text{H}$  NMR (500 MHz,  $\text{CDCl}_3$ ):  $\delta$  7.50–7.35 (m, 2H), 7.35–7.22 (m, 3H), 5.91 (dt,  $J = 15.5, 7.0$  Hz, 1H), 5.52 (dd,  $J = 15.5, 8.5$  Hz, 1H), 4.11 (q,  $J = 8.0$  Hz, 1H), 3.74 (s, 3H), 2.53 (t,  $J = 7.0$  Hz, 2H), 2.47–2.33 (m, 2H), 2.01 (dd,  $J = 12.5, 7.0$  Hz, 1H), 1.62 (dd,  $J = 12.5, 8.5$  Hz, 1H), 1.20 (s, 3H), 1.13 (s, 3H);  $^{13}\text{C}$  NMR (125 MHz,  $\text{CDCl}_3$ ):  $\delta$  176.1, 133.8, 131.4, 130.2, 128.1, 127.6, 123.6, 89.0, 81.3, 63.2, 58.1, 39.6, 37.5, 31.3, 25.5, 24.4, 19.2; IR (neat): 2964, 2931, 2868, 1709, 1441, 1241, 1033, 1014, 967, 756, 692  $\text{cm}^{-1}$ ; HRMS ( $m/z$ ) Calcd for ( $\text{C}_{19}\text{H}_{24}\text{NO}_2$ ) ( $[\text{M}+\text{H}]^+$ ): 298.1802; found: 298.1799.

### 4. $^{13}\text{C}$ -Labeling Experiments.

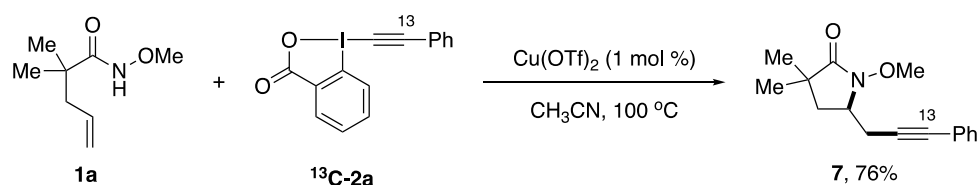

To a reaction tube charged with *N*-methoxy-2,2-dimethylpent-4-en-5-*d*-amide **1a** (23.6 mg, 0.15 mmol, 1.0 equiv) and hypervalent iodine reagent  $^{13}\text{C}$ -**2a**<sup>4</sup> (62.9 mg, 0.18 mmol, 1.2 equiv), was added  $\text{Cu}(\text{OTf})_2$  (0.54 mg, 0.0015 mmol, 1 mol%) and  $\text{CH}_3\text{CN}$  (1 mL). The reaction tube was capped and the resulting mixture was stirred at  $100\text{ }^\circ\text{C}$  for 2 h. After cooling down to room temperature, the reaction mixture was filtered through a pad of  $\text{Al}_2\text{O}_3$  and washed with EtOAc (15 mL). The filtrate was concentrated *in vacuo*. The resulting crude mixture was subject to flash column chromatography (33% EtOAc in hexanes) to provide the aminoalkynylation product **7** as a yellow oil (29.7 mg, 77% yield);  $R_f = 0.30$  (33% EtOAc in hexanes);  $^1\text{H}$  NMR (500 MHz,  $\text{CDCl}_3$ ):  $\delta$  7.45–7.33 (m, 2H), 7.33–7.23 (m, 3H), 3.89 (s, 3H), 3.92–3.82 (m, 1H), 2.90–2.70 (m, 2H), 2.06 (dd,  $J = 12.5, 7.5$  Hz, 1H), 1.87 (dd,  $J = 12.5, 8.0$  Hz, 1H), 1.24 (s, 3H), 1.16 (s, 3H);  $^{13}\text{C}$

NMR (125 MHz, CDCl<sub>3</sub>):  $\delta$  176.3, 131.5, 128.2 (d,  $J$  = 5.0 Hz), 128.0, 123.0 (d,  $J$  = 90.8 Hz), 84.0, 83.7 (<sup>13</sup>C enriched), 63.0, 53.8, 37.5, 37.2, 25.7, 25.0, 23.6; IR (neat): 2964, 2930, 2868, 1706, 1441, 1362, 1264, 1035, 1014, 928, 755, 691 cm<sup>-1</sup>; HRMS (m/z) Calcd for (C<sub>15</sub><sup>13</sup>CH<sub>20</sub>NO<sub>2</sub>) ([M+H]<sup>+</sup>): 259.1522; found: 259.1525.

## VII. Synthesis of Bicyclic Heterocycles.

### 1. Selective Deprotection and Gold-Catalyzed Cyclization

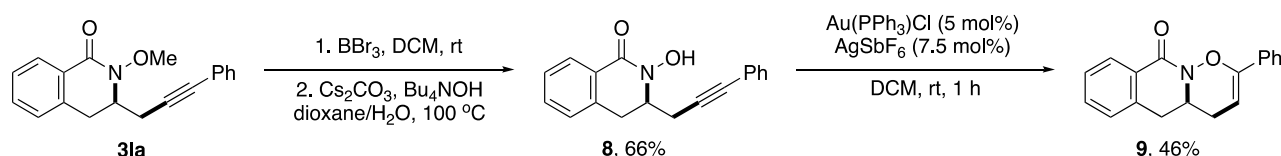

To a 25 mL flask was added a solution of **3la** (146 mg, 0.5 mmol, 1.0 equiv) in DCM (3.5 mL). Then BBr<sub>3</sub> (1.0 M in DCM, 1.5 mL, 1.5 mmol, 3.0 equiv) was added dropwise. The resulting mixture was allowed to stir at room temperature for 1 h before quenching with a saturated aqueous solution of NaHCO<sub>3</sub> (10 mL). The organic layer was separated and the aqueous layer was extracted with DCM (10 mL). The combined organic solvent was dried over Na<sub>2</sub>SO<sub>4</sub> and filtered off. The filtrate was concentrated under reduced pressure. The residue was dissolved in dioxane (3 mL). Then Bu<sub>4</sub>NOH (1.5 M in H<sub>2</sub>O, 1.5 mL, 2.25 mmol, 4.5 equiv), Cs<sub>2</sub>CO<sub>3</sub> (353 mg, 1 mmol, 2.0 equiv) and H<sub>2</sub>O (1.5 mL) were added sequentially. The resulting mixture was allowed to stir at 100 °C for 1 h.<sup>5</sup> The reaction mixture was diluted with EtOAc (20 mL) and washed with a saturated aqueous solution of NH<sub>4</sub>Cl (10 mL). The organic phase was dried over anhydrous Na<sub>2</sub>SO<sub>4</sub>, filtered and concentrated. Purification by column chromatography (33% EtOAc in hexanes) gave 2-hydroxy-3-(3-phenylprop-2-yn-1-yl)-3,4-dihydroisoquinolin-1(2H)-one **8** as a yellow oil (90.8 mg, 66% yield);  $R_f$  = 0.38 (33% EtOAc in hexanes); <sup>1</sup>H NMR (400 MHz, CDCl<sub>3</sub>):  $\delta$  9.50–8.50 (br, 1H), 8.01 (d,  $J$  = 7.6 Hz, 1H), 7.60–7.10 (m, 8H), 4.40–4.20 (m, 1H), 3.50 (dd,  $J$  = 16.4, 6.4 Hz, 1H), 3.33 (dd,  $J$  = 16.4, 4.0 Hz, 1H), 3.05 (dd,  $J$  = 16.8, 2.8 Hz, 1H), 2.69 (dd,  $J$  = 16.8, 9.2 Hz, 1H); <sup>13</sup>C NMR (125 MHz, CDCl<sub>3</sub>):  $\delta$  161.6, 134.9, 132.4, 131.5, 128.2, 128.1, 128.0, 127.4, 127.2, 126.5, 123.0, 84.9, 83.5, 57.8, 31.7, 22.0; IR (neat): 3060, 2858, 1641, 1463, 729, 689 cm<sup>-1</sup>; HRMS (m/z) Calcd for (C<sub>18</sub>H<sub>16</sub>NO<sub>2</sub>) ([M+H]<sup>+</sup>): 278.1175; found: 278.1176.

To a 4 mL vial was added Ph<sub>3</sub>PAuCl (2.47 mg, 0.005 mmol, 5 mol%), AgSbF<sub>6</sub> (2.58 mg, 0.0075 mmol, 7.5 mol%) and DCM (1 mL). The resulting mixture was allowed to stir at room temperature for 15 min before adding a solution of 2-hydroxy-3-(3-phenylprop-2-yn-1-yl)-3,4-dihydroisoquinolin-1(2H)-one **8** (27.7 mg, 0.1 mmol, 1.0 equiv) in DCM (1 mL). The resulting mixture was allowed to stir at room temperature for 1 h. Purification by column chromatography (20% EtOAc in hexanes) gave 2-phenyl-4a,5-dihydro-[1,2]oxazino[2,3-*b*]isoquinolin-10(4H)-one **9** as a colorless oil (12.8 mg, 46% yield);  $R_f$  = 0.62 (33% EtOAc in hexanes); <sup>1</sup>H NMR (400 MHz, CDCl<sub>3</sub>):  $\delta$  8.15 (d,  $J$  = 8.0 Hz, 1H), 7.73 (d,  $J$  = 7.6 Hz, 2H), 7.60–7.40 (m, 2H), 7.40–7.30 (m, 3H), 7.21 (d,  $J$  = 7.2 Hz, 1H), 5.32 (dd,  $J$  = 5.2, 2.8 Hz, 1H), 4.55–4.40 (m, 1H), 3.75 (dd,  $J$  = 16.4, 6.0 Hz, 1H), 3.02 (dd,  $J$  = 16.4, 2.4 Hz, 1H), 2.48 (ddd,  $J$  = 17.6, 11.2, 2.8 Hz, 1H), 2.19 (dt,  $J$  =

17.2, 5.2 Hz, 1H);  $^{13}\text{C}$  NMR (100 MHz,  $\text{CDCl}_3$ ):  $\delta$  164.1, 155.4, 135.4, 133.1, 132.9, 129.0, 128.7, 128.3, 128.1, 127.4, 126.9, 125.6, 97.1, 55.5, 33.0, 25.8; IR (neat): 3058, 2928, 2837, 1685, 1662, 1245, 926, 757  $\text{cm}^{-1}$ ; HRMS (m/z) Calcd for ( $\text{C}_{18}\text{H}_{16}\text{NO}_2$ ) ( $[\text{M}+\text{H}]^+$ ): 278.1175; found: 278.1177.

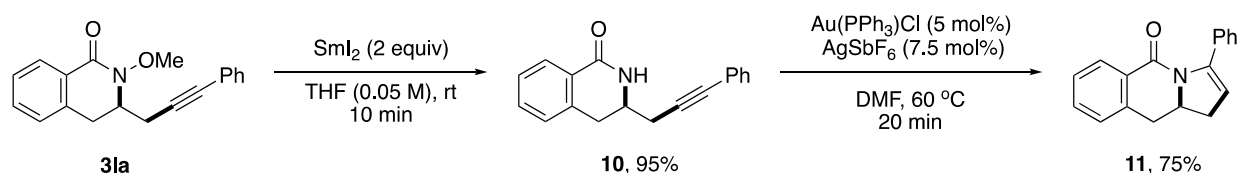

A 25 mL round-bottomed flask was charged with **3la** (232.8 mg, 0.8 mmol, 1.0 equiv). The flask was degassed and refilled with  $\text{N}_2$  for three times. Then  $\text{SmI}_2$  (0.1 M in THF, 16 mL, 1.6 mmol, 2.0 equiv) was added dropwise under  $\text{N}_2$  atmosphere. The resulting mixture was stirred at room temperature for 10 min and then the reaction was quenched by the addition of a saturated aqueous solution of  $\text{Na}_2\text{S}_2\text{O}_3$ . The organic layer was separated and the aqueous layer was extracted with EtOAc. The combined organic solvent was dried over  $\text{Na}_2\text{SO}_4$  and filtered off. The filtrate was concentrated under reduced pressure. Purification by column chromatography (50% EtOAc in hexanes) gave 3-(3-phenylprop-2-yn-1-yl)-3,4-dihydroisoquinolin-1(2H)-one **10** as a yellow solid (198.4 mg, 95% yield);  $R_f$  = 0.21 (33% EtOAc in hexanes);  $^1\text{H}$  NMR (400 MHz,  $\text{CDCl}_3$ ):  $\delta$  8.07 (d,  $J$  = 7.6 Hz, 1H), 7.45 (t,  $J$  = 7.6 Hz, 1H), 7.42–7.32 (m, 3H), 7.32–7.25 (m, 3H), 7.22 (d,  $J$  = 7.6 Hz, 1H), 6.26 (s, br, 1H), 4.00–3.90 (m, 1H), 3.10 (dd,  $J$  = 15.6, 4.8 Hz, 1H), 3.00 (dd,  $J$  = 15.6, 9.6 Hz, 1H), 2.80–2.60 (m, 2H);  $^{13}\text{C}$  NMR (125 MHz,  $\text{CDCl}_3$ , one carbon missing):  $\delta$  165.8, 137.1, 132.4, 131.6, 128.3, 128.2, 128.0, 127.5, 127.2, 122.7, 84.4, 83.9, 50.3, 33.7, 26.3; IR (neat): 3188, 3053, 2924, 2896, 1660, 1335, 743, 687  $\text{cm}^{-1}$ ; HRMS (m/z) Calcd for ( $\text{C}_{18}\text{H}_{16}\text{NO}$ ) ( $[\text{M}+\text{H}]^+$ ): 262.1226; found: 262.1224.

To a 4 mL vial was added  $\text{Ph}_3\text{PAuCl}$  (2.47 mg, 0.005 mmol, 5 mol%),  $\text{AgSbF}_6$  (2.58 mg, 0.0075 mmol, 7.5 mol%) and DMF (0.5 mL). The resulting mixture was allowed to stir at room temperature for 15 min before adding a solution of 3-(3-phenylprop-2-yn-1-yl)-3,4-dihydroisoquinolin-1(2H)-one **10** (26.1 mg, 0.1 mmol, 1.0 equiv) in DMF (0.5 mL). The resulting mixture was allowed to stir at 60 °C for 20 min. The reaction was quenched by the addition of  $\text{H}_2\text{O}$  and  $\text{Et}_2\text{O}$ . The organic layer was separated and the aqueous layer was extracted with  $\text{Et}_2\text{O}$ . The combined organic solvent was dried over  $\text{Na}_2\text{SO}_4$  and filtered off. The filtrate was concentrated under reduced pressure. Purification by column chromatography (20% EtOAc in hexanes) gave 3-phenyl-10,10a-dihydropyrrolo[1,2-*b*]isoquinolin-5(1H)-one **11** as a colorless oil (19.6 mg, 75% yield);  $R_f$  = 0.59 (33% EtOAc in hexanes);  $^1\text{H}$  NMR (400 MHz,  $\text{CD}_3\text{OD}$ ):  $\delta$  7.86 (d,  $J$  = 8.0 Hz, 1H), 7.62–7.22 (m, 8H), 5.60–5.50 (m, 1H), 4.50–4.30 (m, 1H), 3.40–3.20 (m, 1H), 3.20–3.00 (m, 1H), 3.00–2.90 (m, 1H), 2.70–2.50 (m, 1H);  $^{13}\text{C}$  NMR (125 MHz,  $\text{CD}_3\text{OD}$ ):  $\delta$  162.8, 145.8, 139.1, 134.7, 131.6, 129.1, 128.8, 128.5, 128.4, 128.2, 116.6, 60.6, 36.9, 35.7; IR (neat): 3055, 2918, 2849, 1655, 1400, 1352, 743, 695  $\text{cm}^{-1}$ ; HRMS (m/z) Calcd for ( $\text{C}_{18}\text{H}_{16}\text{NO}$ ) ( $[\text{M}+\text{H}]^+$ ): 262.1226; found: 262.1226.

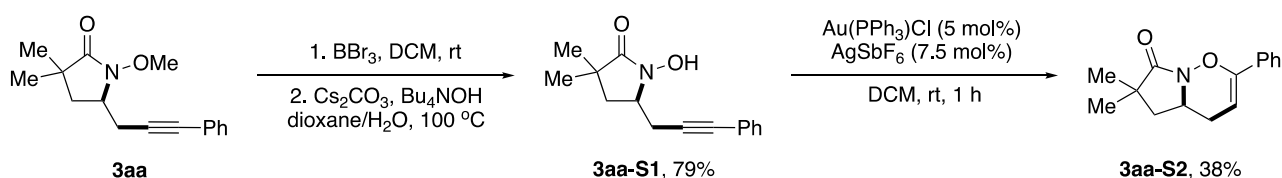

To a 100 mL flask was added a solution of **3aa** (1.03 g, 4 mmol, 1.0 equiv) in DCM (10 mL). Then BBr<sub>3</sub> (1.0 M in DCM, 12 mL, 12 mmol, 3.0 equiv) was added dropwise. The resulting mixture was allowed to stir at room temperature for 1 h before quenching with a saturated aqueous solution of NaHCO<sub>3</sub> (50 mL). The organic layer was separated and the aqueous layer was extracted with DCM (50 mL). The combined organic solvent was dried over Na<sub>2</sub>SO<sub>4</sub> and filtered off. The filtrate was concentrated under reduced pressure. The residue was dissolved in dioxane (20 mL). Then Bu<sub>4</sub>NOH (1.5 M in H<sub>2</sub>O, 13.3 mL, 20 mmol, 5.0 equiv), Cs<sub>2</sub>CO<sub>3</sub> (2.83 g, 8 mmol, 2.0 equiv) and H<sub>2</sub>O (8 mL) were added sequentially. The resulting mixture was allowed to stir at 100 °C for 1 h.<sup>5</sup> The reaction mixture was diluted with EtOAc (100 mL) and washed with a saturated aqueous solution of NH<sub>4</sub>Cl (50 mL). The organic phase was dried over anhydrous Na<sub>2</sub>SO<sub>4</sub>, filtered and concentrated. Purification by column chromatography (50% EtOAc in hexanes) gave 1-hydroxy-3,3-dimethyl-5-(3-phenylprop-2-yn-1-yl)pyrrolidin-2-one **3aa-S1** as a yellow oil (767.8 mg, 79% yield); R<sub>f</sub> = 0.11 (33% EtOAc in hexanes); <sup>1</sup>H NMR (400 MHz, CDCl<sub>3</sub>): δ 7.45–7.33 (m, 2H), 7.33–7.15 (m, 3H), 4.00–3.80 (m, 1H), 2.97 (dd, *J* = 16.8, 3.6 Hz, 1H), 2.69 (dd, *J* = 16.8, 7.6 Hz, 1H), 2.10 (dd, *J* = 16.8, 7.6 Hz, 1H), 1.82 (dd, *J* = 12.8, 7.2 Hz, 1H), 1.16 (s, 3H), 1.10 (s, 3H); <sup>13</sup>C NMR (100 MHz, CDCl<sub>3</sub>): δ 175.4, 131.5, 128.0, 127.8, 123.1, 84.5, 83.0, 55.6, 37.9, 37.4, 25.7, 25.2, 23.7; IR (neat): 3060, 2962, 2867, 1679, 1489, 1362, 1301, 1268, 1029, 1005, 755, 736, 690 cm<sup>-1</sup>; HRMS (m/z) Calcd for (C<sub>15</sub>H<sub>18</sub>NO<sub>2</sub>) ([M+H]<sup>+</sup>): 244.1332; found: 244.1335.

To a 4 mL vial was added Ph<sub>3</sub>PAuCl (4.94 mg, 0.01 mmol, 5 mol%), AgSbF<sub>6</sub> (5.16 mg, 0.015 mmol, 7.5 mol%) and DCM (1 mL). The resulting mixture was allowed to stir at room temperature for 15 min before adding a solution of 1-hydroxy-3,3-dimethyl-5-(3-phenylprop-2-yn-1-yl)pyrrolidin-2-one **3aa-S1** (48.6 mg, 0.2 mmol, 1.0 equiv) in DCM (1 mL). The resulting mixture was allowed to stir at room temperature for 1 h. Purification by column chromatography (20% EtOAc in hexanes) gave 6,6-dimethyl-2-phenyl-4,4a,5,6-tetrahydro-7H-pyrrolo[1,2-*b*][1,2]oxazin-7-one **3aa-S2** as a yellow oil (18.5 mg, 38% yield); R<sub>f</sub> = 0.42 (33% EtOAc in hexanes); <sup>1</sup>H NMR (400 MHz, CDCl<sub>3</sub>): δ 7.70–7.50 (m, 2H), 7.45–7.25 (m, 3H), 5.36 (dd, *J* = 6.4, 2.4 Hz, 1H), 3.90–3.75 (m, 1H), 2.54 (dt, *J* = 17.2, 5.2 Hz, 1H), 2.29 (dd, *J* = 12.8, 6.8 Hz, 1H), 2.27 (ddd, *J* = 17.2, 9.6, 2.4 Hz, 1H), 1.61 (dd, *J* = 12.8, 7.2 Hz, 1H), 1.26 (s, 3H), 1.23 (s, 3H); <sup>13</sup>C NMR (100 MHz, CDCl<sub>3</sub>): δ 171.7, 152.0, 132.4, 128.8, 128.2, 125.0, 94.7, 48.9, 39.9, 37.9, 29.6, 25.9, 25.3; IR (neat): 2962, 2927, 2868, 1714, 1658, 1446, 1328, 1307, 1276, 1239, 1076, 1052, 1004, 982, 756, 691 cm<sup>-1</sup>; HRMS (m/z) Calcd for (C<sub>15</sub>H<sub>18</sub>NO<sub>2</sub>) ([M+H]<sup>+</sup>): 244.1332; found: 244.1338.

## 2. Synthesis of Pyrrolizidine Derivatives

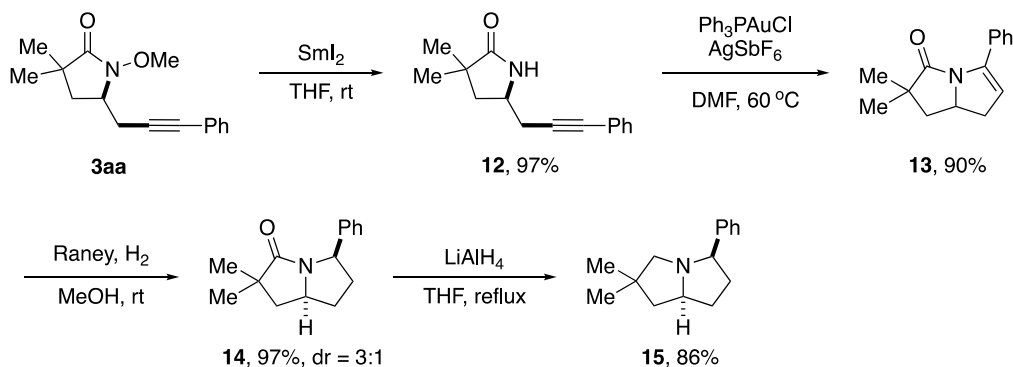

A 25 mL round-bottomed flask was charged with **3aa** (257 mg, 1 mmol, 1.0 equiv). The flask was degassed and refilled with N<sub>2</sub> for three times. Then SmI<sub>2</sub> (0.1 M in THF, 20 mL, 2.0 mmol, 2.0 equiv) was added dropwise under N<sub>2</sub> atmosphere. The resulting mixture was stirred at room temperature for 30 min and then the reaction was quenched by the addition of a saturated aqueous solution of Na<sub>2</sub>S<sub>2</sub>O<sub>3</sub>. The organic layer was separated and the aqueous layer was extracted with EtOAc. The combined organic solvent was dried over Na<sub>2</sub>SO<sub>4</sub> and filtered off. The filtrate was concentrated under reduced pressure. Purification by column chromatography (50% EtOAc in hexanes) gave 3,3-dimethyl-5-(3-phenylprop-2-yn-1-yl)pyrrolidin-2-one **12** as a white solid (220.2 mg, 97% yield); R<sub>f</sub> = 0.21 (50% EtOAc in hexanes); <sup>1</sup>H NMR (500 MHz, CDCl<sub>3</sub>): δ 7.45–7.35 (m, 2H), 7.32–7.20 (m, 4H), 3.84–3.74 (m, 1H), 2.57 (d, *J* = 6.0 Hz, 1H), 2.13 (dd, *J* = 13.0, 7.0 Hz, 1H), 1.71 (dd, *J* = 13.0, 7.5 Hz, 1H), 1.19 (s, 3H), 1.15 (s, 3H); <sup>13</sup>C NMR (125 MHz, CDCl<sub>3</sub>): δ 182.7, 131.4, 128.0, 127.7, 123.0, 85.2, 82.7, 49.9, 42.0, 40.6, 27.0, 25.3, 25.0; IR (neat): 3170, 3078, 2956, 2867, 1682, 1270, 755, 689 cm<sup>-1</sup>; HRMS (m/z) Calcd for (C<sub>15</sub>H<sub>18</sub>NO) ([M+H]<sup>+</sup>): 228.1383; found: 228.1384.

To a 4 mL vial was added Ph<sub>3</sub>PAuCl (4.94 mg, 0.01 mmol, 5 mol%), AgSbF<sub>6</sub> (5.15 mg, 0.015 mmol, 7.5 mol%) and DMF (1 mL). The resulting mixture was allowed to stir at room temperature for 15 min before adding a solution of 3,3-dimethyl-5-(3-phenylprop-2-yn-1-yl)pyrrolidin-2-one **12** (45.4 mg, 0.2 mmol, 1.0 equiv) in DMF (1 mL). The resulting mixture was allowed to stir at 60 °C for 30 min. The reaction was quenched by the addition of H<sub>2</sub>O and Et<sub>2</sub>O. The organic layer was separated and the aqueous layer was extracted with Et<sub>2</sub>O. The combined organic solvent was dried over Na<sub>2</sub>SO<sub>4</sub> and filtered off. The filtrate was concentrated under reduced pressure. Purification by column chromatography (25% EtOAc in hexanes) gave 2,2-dimethyl-5-phenyl-1,2,7,7a-tetrahydro-3H-pyrrolizin-3-one **13** as a colorless oil (40.6 mg, 90% yield); R<sub>f</sub> = 0.56 (33% EtOAc in hexanes); <sup>1</sup>H NMR (500 MHz, CD<sub>3</sub>OD): δ 7.47 (d, *J* = 8.0 Hz, 2H), 7.35–7.25 (m, 3H), 5.79–5.74 (m, 1H), 4.70–4.55 (m, 1H), 2.72 (ddd, *J* = 16.5, 9.0, 3.5 Hz, 1H), 2.40 (dd, *J* = 16.5, 10.5 Hz, 1H), 2.30 (dd, *J* = 12.0, 6.5 Hz, 1H), 1.84 (dd, *J* = 12.0, 10.0 Hz, 1H), 1.33 (s, 3H), 1.16 (s, 3H); <sup>13</sup>C NMR (125 MHz, CD<sub>3</sub>OD): δ 179.4, 142.7, 132.1, 129.5, 128.9, 128.2, 116.7, 62.2, 48.4, 44.5, 37.0, 25.3, 24.7; IR (neat): 2961, 2928, 2867, 1695, 1447, 1388, 1287, 1243, 751, 696 cm<sup>-1</sup>; HRMS (m/z) Calcd for (C<sub>15</sub>H<sub>18</sub>NO) ([M+H]<sup>+</sup>): 228.1383; found: 228.1384.

To a 15 mL round-bottomed flask was added Raney Ni (40 mg), 2,2-dimethyl-5-phenyl-1,2,7,7a-tetrahydro-3H-pyrrolizin-3-one **13** (45.4 mg, 0.2 mmol) and MeOH (8 mL) under N<sub>2</sub> atmosphere. An atmosphere of

hydrogen was introduced by briefly evacuating the flask, then flushing with pure hydrogen (1 atm, hydrogen balloon). The mixture was stirred at room temperature overnight under H<sub>2</sub> atmosphere. The hydrogen was then removed under vacuum, and the flask was refilled with N<sub>2</sub>. The mixture was filtered through a pale of Celite and the filtrate was concentrated under reduced pressure. The crude reaction mixture contains two diastereoisomers with d.r. = 3:1 detected by <sup>1</sup>H NMR. Purification by column chromatography (33% EtOAc in hexanes) gave 2,2-dimethyl-5-phenylhexahydro-3*H*-pyrrolizin-3-one **14** as a mixture of separable diastereomers (34.2 mg major and 10.4 mg minor, 97% yield, relative stereochemistry was determined by the NOESY of both diastereomers).

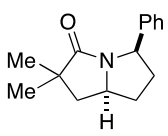 **Major diastereomer:** colorless oil; *R<sub>f</sub>* = 0.20 (33% EtOAc in hexanes); <sup>1</sup>H NMR (500 MHz, CDCl<sub>3</sub>): δ 7.45–7.05 (m, 5H), 4.67 (d, *J* = 9.0 Hz, 1H), 4.05–3.95 (m, 1H), 2.70–2.50 (m, 1H), 2.25–2.10 (m, 1H), 2.10–1.90 (m, 2H), 1.90–1.75 (m, 1H), 1.75–1.55 (m, 1H), 1.23 (s, 3H), 1.21 (s, 3H); <sup>13</sup>C NMR (125 MHz, CDCl<sub>3</sub>): δ 175.7, 141.4, 128.2, 126.8, 125.7, 59.6, 56.4, 47.3, 43.0, 38.7, 28.8, 25.5, 23.1; IR (neat): 2951, 2867, 1677, 1412, 748, 695 cm<sup>-1</sup>; HRMS (*m/z*) Calcd for (C<sub>15</sub>H<sub>20</sub>NO) ([*M*+*H*]<sup>+</sup>): 230.1539; found: 230.1546.

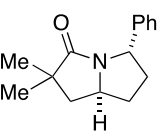 **Minor diastereomer:** colorless oil; *R<sub>f</sub>* = 0.37 (33% EtOAc in hexanes); <sup>1</sup>H NMR (500 MHz, CDCl<sub>3</sub>): δ 7.60–7.10 (m, 5H), 4.95 (t, *J* = 8.0 Hz, 1H), 4.20–4.00 (m, 1H), 2.75–2.60 (m, 1H), 2.35–2.10 (m, 2H), 2.10–1.95 (m, 1H), 1.75–1.60 (m, 1H), 1.52–1.38 (m, 1H), 1.33 (s, 3H), 1.21 (s, 3H); <sup>13</sup>C NMR (125 MHz, CDCl<sub>3</sub>): δ 179.5, 142.7, 128.4, 126.7, 125.3, 58.2, 56.8, 45.7, 43.7, 37.0, 33.2, 25.5, 25.1; IR (neat): 2959, 2866, 1687, 1400, 1132, 752, 696 cm<sup>-1</sup>; HRMS (*m/z*) Calcd for (C<sub>15</sub>H<sub>20</sub>NO) ([*M*+*H*]<sup>+</sup>): 230.1539; found: 230.1545.

Relative stereochemistry was assigned on the basis of NOESY.

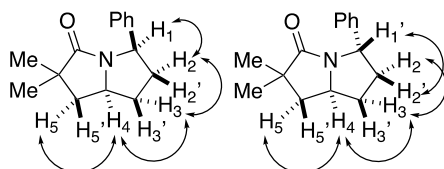

To a 25 mL round-bottomed flask charged with LiAlH<sub>4</sub> (19 mg, 0.5 mmol, 5.0 equiv), was added a solution of 2,2-dimethyl-5-phenylhexahydro-3*H*-pyrrolizin-3-one **14-major** (22.9 mg, 0.1 mmol, 1.0 equiv) in THF (4 mL) at room temperature. The resulting mixture was refluxed for 3 h. The reaction was quenched with the addition of an aqueous solution of NaOH (2 M, 1 mL). The mixture was filtered through a pale of Celite. The solvent was removed under reduced pressure to give 2,2-dimethyl-5-phenylhexahydro-1*H*-pyrrolizine **15** as a colorless oil (18.5 mg, 86% yield); *R<sub>f</sub>* = 0.19 (5% MeOH in DCM); <sup>1</sup>H NMR (500 MHz, CDCl<sub>3</sub>): δ 7.43 (d, *J* = 7.5 Hz, 2H), 7.33 (t, *J* = 7.5 Hz, 2H), 7.26 (t, *J* = 7.5 Hz, 1H), 4.22–4.10 (m, 1H), 3.82–3.67 (m, 1H), 2.20–1.80 (m, 6H), 1.70–1.60 (m, 1H), 1.26–1.16 (m, 1H), 1.10 (s, 3H), 0.97 (s, 3H); <sup>13</sup>C NMR (125 MHz, CDCl<sub>3</sub>): δ 140.2, 128.4, 127.9, 126.8, 65.8, 64.2, 62.1, 48.0, 39.6, 31.6, 27.5, 26.9, 26.8; IR (neat): 2949, 2863, 1449, 1364, 1120, 1056, 744, 697 cm<sup>-1</sup>; HRMS (*m/z*) Calcd for (C<sub>15</sub>H<sub>22</sub>N) ([*M*+*H*]<sup>+</sup>): 216.1747; found: 216.1751.

### VIII. Synthesis of Alkyne-Labeled Mesembrane.

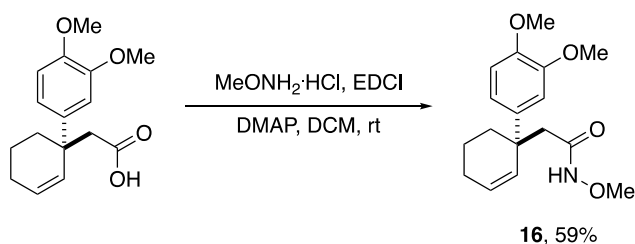

To a solution of 2-(3',4'-dimethoxy-3,4-dihydro-[1,1'-biphenyl]-1(2H)-yl)acetic acid (3.3 g, 12 mmol, 1.0 equiv) in CH<sub>2</sub>Cl<sub>2</sub> (60 mL) was added MeONH<sub>2</sub>·HCl (1.5 g, 18 mmol, 1.5 equiv), EDCI (4.62 g, 24 mmol, 2.0 equiv) and DMAP (2.94 g, 24 mmol, 2.0 equiv) successively. The resulting mixture was allowed to stir at room temperature overnight, and then an aqueous solution of HCl (2 M) was added. The organic layer was separated and the aqueous layer was extracted with CH<sub>2</sub>Cl<sub>2</sub> (10 mL). The combined extracts were washed with brine, dried over Na<sub>2</sub>SO<sub>4</sub>, and filtrated. The filtrate was concentrated. Purification by column chromatography (50% EtOAc in hexanes) gave **16** as a yellow oil (2.16 g, 59% yield); *R<sub>f</sub>* = 0.12 (50% EtOAc in hexanes); <sup>1</sup>H NMR (500 MHz, CDCl<sub>3</sub>): δ 8.25 (s, 1H), 6.90–6.82 (m, 2H), 6.82–6.74 (m, 1H), 6.00 (d, *J* = 10.0 Hz, 1H), 5.92 (d, *J* = 10.0 Hz, 1H), 3.82 (s, 3H), 3.81 (s, 3H), 3.48 (s, 3H), 2.60–2.25 (m, 2H), 2.07–1.97 (m, 3H), 1.85 (t, *J* = 12.0 Hz, 1H), 1.62–1.45 (m, 1H), 1.39–1.20 (m, 1H); <sup>13</sup>C NMR (125 MHz, CDCl<sub>3</sub>): δ 168.5, 148.5, 147.2, 139.0, 131.4, 129.1, 119.0, 110.8, 110.3, 63.9, 55.8, 55.7, 46.7, 41.6, 36.4, 25.0, 18.5; IR (neat): 3190, 2931, 2833, 1651, 1511, 1442, 1252, 1135, 1023, 756, 699 cm<sup>-1</sup>; HRMS (*m/z*) Calcd for (C<sub>17</sub>H<sub>24</sub>NO<sub>4</sub>) ([M+H]<sup>+</sup>): 306.1700; found: 306.1697.

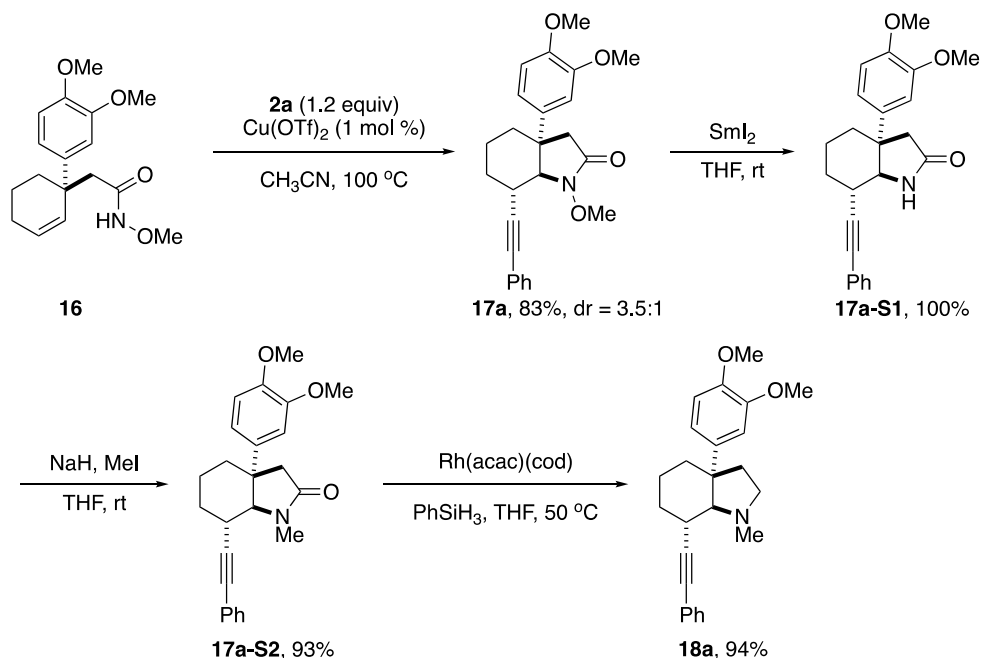

To a reaction tube charged with **16** (91.5 mg, 0.3 mmol, 1.0 equiv) and hypervalent iodine reagent **2a** (125.3 mg, 0.36 mmol, 1.2 equiv), was added Cu(OTf)<sub>2</sub> (1.08 mg, 0.003 mmol, 1 mol %) and CH<sub>3</sub>CN (1.5 mL). The reaction tube was capped and the resulting mixture was allowed to stir at 100 °C for 12 h. After cooling down to room temperature, the reaction mixture was filtered through a pad of Al<sub>2</sub>O<sub>3</sub> and washed with EtOAc (15 mL). The filtrate was concentrated *in vacuo*. The resulting crude mixture was subject to flash column



chromatography to provide the aminoalkynylation product **17a** as a mixture of separable diastereomers (100.7 mg, 83% yield, d.r. = 3.5:1 detected by crude  $^1\text{H}$  NMR, major diastereomer shown);  $R_f$  = 0.35 (50% EtOAc in hexanes);  $^1\text{H}$  NMR (500 MHz,  $\text{CDCl}_3$ ):  $\delta$  7.25–7.15 (m, 3H), 7.07 (d,  $J$  = 8.5 Hz, 1H), 7.05–6.95 (m, 3H), 6.78 (d,  $J$  = 8.5 Hz, 1H), 4.30 (d,  $J$  = 3.5 Hz, 1H), 3.88 (s, 3H), 3.82 (s, 3H), 3.81 (s, 3H), 3.27 (q,  $J$  = 3.5 Hz, 1H), 2.59 (d,  $J$  = 17.0 Hz, 1H), 2.43 (d,  $J$  = 17.0 Hz, 1H), 2.36–2.26 (m, 1H), 2.07–1.95 (m, 1H), 1.95–1.85 (m, 1H), 1.85–1.73 (m, 2H), 1.67–1.57 (m, 1H);  $^{13}\text{C}$  NMR (125 MHz,  $\text{CDCl}_3$ ):  $\delta$  170.6, 148.7, 147.7, 136.7, 131.2, 127.8, 127.7, 122.9, 118.8, 110.8, 110.3, 89.7, 83.0, 65.6, 62.7, 56.0, 55.7, 45.2, 39.8, 32.8, 28.1, 25.8, 18.6; IR (neat): 2940, 2855, 1714, 1520, 1445, 1241, 1145, 1020, 756  $\text{cm}^{-1}$ ; HRMS (m/z) Calcd for ( $\text{C}_{25}\text{H}_{28}\text{NO}_4$ ) ( $[\text{M}+\text{H}]^+$ ): 406.2013; found: 406.2011.

A 25 mL round-bottomed flask was charged with **17a-major** (202.5 mg, 0.5 mmol, 1.0 equiv). The flask was degassed and refilled with  $\text{N}_2$  for three times. Then  $\text{SmI}_2$  (0.1 M in THF, 10 mL, 1.0 mmol, 2.0 equiv) was added dropwise under  $\text{N}_2$  atmosphere. The resulting mixture was stirred at room temperature for 5 min and then the reaction was quenched by the addition of a saturated aqueous solution of  $\text{Na}_2\text{S}_2\text{O}_3$ . The organic layer was separated and the aqueous layer was extracted with EtOAc. The combined organic solvent was dried over  $\text{Na}_2\text{SO}_4$  and filtered off. The filtrate was concentrated under reduced pressure to give **17a-S1** as a yellow solid (190.2 mg, 100% yield);  $R_f$  = 0.12 (50% EtOAc in hexanes);  $^1\text{H}$  NMR (500 MHz,  $\text{CDCl}_3$ ):  $\delta$  7.26 (s, 5H), 7.01 (d,  $J$  = 8.5 Hz, 1H), 6.95 (s, 1H), 6.80 (d,  $J$  = 8.5 Hz, 1H), 6.55 (s, br, 1H), 3.94 (d,  $J$  = 8.0 Hz, 1H), 3.87 (s, 3H), 3.84 (s, 3H), 2.80–2.70 (m, 1H), 2.60 (s, 2H), 2.05–1.90 (m, 3H), 1.90–1.80 (m, 1H), 1.55–1.50 (m, 2H);  $^{13}\text{C}$  NMR (125 MHz,  $\text{CDCl}_3$ ):  $\delta$  176.4, 148.7, 147.7, 138.2, 131.4, 128.1, 127.9, 122.8, 118.2, 110.8, 109.9, 90.1, 82.8, 63.3, 56.0, 55.8, 45.5, 42.4, 34.5, 34.0, 27.8, 20.6; IR (neat): 2936, 1697, 1519, 1442, 1253, 1149, 1025, 758, 693  $\text{cm}^{-1}$ ; HRMS (m/z) Calcd for ( $\text{C}_{24}\text{H}_{26}\text{NO}_3$ ) ( $[\text{M}+\text{H}]^+$ ): 376.1907; found: 376.1908.

To a solution of **17a-S1** (75 mg, 0.2 mmol, 1.0 equiv) in THF (2 mL) was added NaH (24 mg, 60% dispersion in mineral oil, 0.6 mmol, 3.0 equiv). The resulting mixture was allowed to stir at room temperature for 30 min and then methyl iodide (85.2 mg, 0.6 mmol, 3.0 equiv) was added. The resulting mixture was allowed to stir at room temperature for 90 min. The reaction was quenched by the addition of a saturated aqueous solution of  $\text{NH}_4\text{Cl}$ . The organic layer was separated and the aqueous layer was extracted with EtOAc. The combined organic solvent was dried over  $\text{Na}_2\text{SO}_4$  and filtered off. The filtrate was concentrated under reduced pressure. Purification by column chromatography (50% EtOAc in hexanes) gave **17a-S2** as a yellow oil (72.1 mg, 93% yield);  $R_f$  = 0.19 (50% EtOAc in hexanes);  $^1\text{H}$  NMR (500 MHz,  $\text{CDCl}_3$ ):  $\delta$  7.36–7.16 (m, 5H), 6.97 (d,  $J$  = 8.5 Hz, 1H), 6.92 (s, 1H), 6.81 (d,  $J$  = 8.5 Hz, 1H), 3.88 (s, 3H), 3.84 (s, 3H), 3.87–3.82 (m, 1H), 3.02 (s, 3H), 2.90–2.80 (m, 1H), 2.66 (d,  $J$  = 16.5 Hz, 1H), 2.60 (d,  $J$  = 16.5 Hz, 1H), 2.08–1.86 (m, 4H), 1.70–1.52 (m, 2H);  $^{13}\text{C}$  NMR (125 MHz,  $\text{CDCl}_3$ ):  $\delta$  173.4, 148.8, 147.7, 138.5, 131.3, 128.1, 127.9, 123.0, 118.1, 110.9, 109.9, 90.9, 83.2, 69.0, 56.0, 55.8, 44.2, 42.8, 33.9, 32.7, 29.5, 28.5, 20.4; IR (neat): 2933, 2859, 1688, 1518, 1442, 1393, 1251, 1148, 1024, 756, 691  $\text{cm}^{-1}$ ; HRMS (m/z) Calcd for ( $\text{C}_{25}\text{H}_{28}\text{NO}_3$ ) ( $[\text{M}+\text{H}]^+$ ): 390.2064; found: 390.2063.

To a solution of **17a-S2** (77.8 mg, 0.2 mmol, 1.0 equiv) in THF (1 mL) was added Rh(acac)(cod) (1.24 mg, 0.004 mmol, 2 mol %). Then PhSiH<sub>3</sub> (0.1 mL, 0.8 mmol, 4.0 equiv) was added dropwise. The resulting solution was allowed to stir at 50 °C for 0.5 h. The solvent was removed under reduced pressure. Purification by column chromatography (33% EtOAc in hexanes containing 5% TEA) gave **18a** as a yellow oil (70.6 mg, 94% yield); *R<sub>f</sub>* = 0.42 (50% EtOAc in hexanes containing 5% TEA); <sup>1</sup>H NMR (500 MHz, CDCl<sub>3</sub>): δ 7.23–7.11 (m, 3H), 7.10–7.02 (m, 2H), 7.02–6.96 (m, 2H), 6.75 (d, *J* = 8.0 Hz, 1H), 3.84 (s, 3H), 3.78 (s, 3H), 3.28–3.18 (m, 1H), 3.02–2.94 (m, 2H), 2.52–2.45 (m, 1H), 2.44 (s, 3H), 2.16–2.08 (m, 1H), 2.01–1.81 (m, 5H), 1.65–1.53 (m, 2H); <sup>13</sup>C NMR (125 MHz, CDCl<sub>3</sub>): δ 148.3, 146.9, 139.9, 131.3, 127.7, 127.2, 123.6, 119.1, 111.1, 110.5, 92.4, 82.2, 73.4, 56.0, 55.6, 54.1, 47.6, 41.38, 41.31, 33.3, 28.9, 26.2, 19.6; IR (neat): 2932, 2832, 1736, 1517, 1452, 1246, 1145, 1026, 755, 691 cm<sup>-1</sup>; HRMS (*m/z*) Calcd for (C<sub>25</sub>H<sub>30</sub>NO<sub>2</sub>) ([*M*+H]<sup>+</sup>): 376.2271; found: 376.2272.

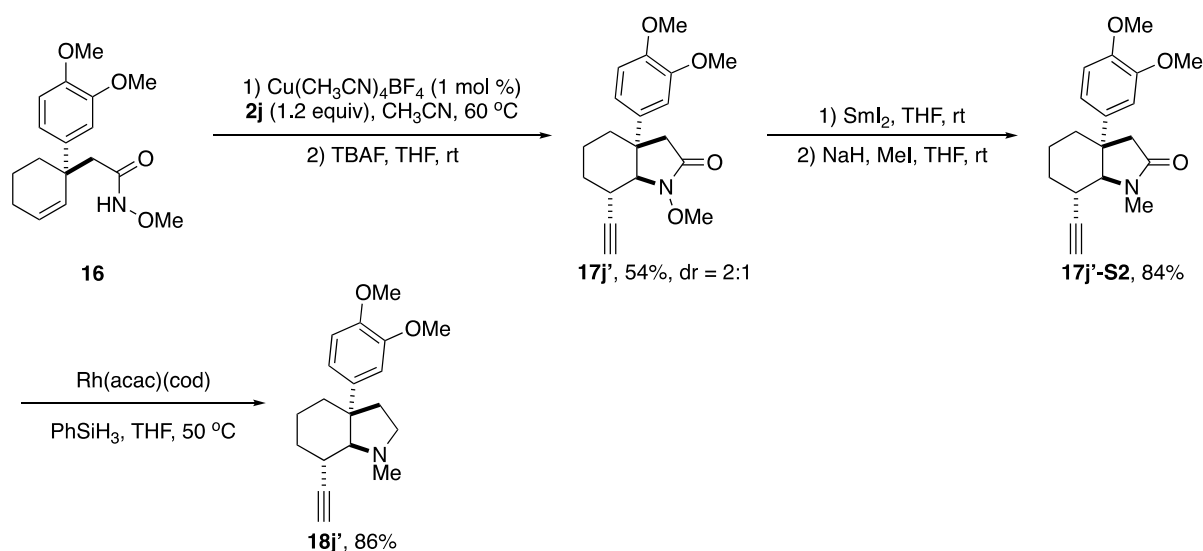

To a reaction tube charged with **16** (91.5 mg, 0.3 mmol, 1.0 equiv) and hypervalent iodine reagent **2j** (139 mg, 0.36 mmol, 1.2 equiv), was added Cu(CH<sub>3</sub>CN)<sub>4</sub>BF<sub>4</sub> (0.95 mg, 0.003 mmol, 1 mol %) and CH<sub>3</sub>CN (1.5 mL). The reaction tube was capped and the resulting mixture was allowed to stir at 60 °C for 12 h. After cooling down to room temperature, the reaction mixture was filtered through a pad of Al<sub>2</sub>O<sub>3</sub> and washed with EtOAc (15 mL). The filtrate was concentrated *in vacuo*. The residue was dissolved in THF (3 mL). Then TBAF (1 M in THF, 0.4 mL, 0.4 mmol) was added dropwise. The resulting mixture was allowed to stir at room temperature overnight. The reaction was quenched by the addition of a saturated aqueous solution of NH<sub>4</sub>Cl. The organic layer was separated and the aqueous layer was extracted with EtOAc. The combined organic solvent was dried over Na<sub>2</sub>SO<sub>4</sub> and filtered off. The filtrate was concentrated under reduced pressure. Purification by column chromatography (50% EtOAc in hexanes) gave **17j'** as a mixture of inseparable diastereomers as a white solid (53.46 mg, 54% yield, d.r. = 2:1 detected by crude <sup>1</sup>H NMR, major diastereomer shown); *R<sub>f</sub>* = 0.33 (67% EtOAc in hexanes); <sup>1</sup>H NMR (400 MHz, CDCl<sub>3</sub>, signals for the minor diastereoisomer are reported in *italics*): δ 7.00–6.75 (m, 3H, both), 4.20–4.10 (m, 1H, both), 3.90–3.30 (m, 9H, both), 3.05–2.90 (m, 1H, both), 2.56 (d, *J* = 16.8 Hz, 1H), 2.52 (d, *J* = 16.8 Hz, 1H), 2.43 (d, *J* = 16.8

Hz, 1H), 2.41 (d,  $J = 16.8$  Hz, 1H), 2.25–2.10 (m, 1H, both), 2.05–1.40 (m, 6H, both);  $^{13}\text{C}$  NMR (125 MHz,  $\text{CDCl}_3$ , signals for the minor diastereoisomer are reported in *italics*):  $\delta$  172.2, 170.1, 148.9, 148.5, 147.8, 147.6, 136.9, 136.2, 118.5, 118.1, 110.9, 110.6, 110.0, 109.5, 84.4, 83.9, 70.7, 70.6, 65.1, 63.2, 62.6, 62.4, 55.9 (both), 55.7 (both), 44.1, 43.8, 40.6, 40.0, 33.7, 33.1, 28.6, 27.9, 26.5, 26.0, 20.4, 18.5; IR (neat): 3247, 2935, 1712, 1516, 1444, 1244, 1146, 1022  $\text{cm}^{-1}$ ; HRMS ( $m/z$ ) Calcd for ( $\text{C}_{19}\text{H}_{23}\text{NO}_4$ ) ( $[\text{M}+\text{H}]^+$ ): 330.1700; found: 330.1702.

A 25 mL round-bottomed flask was charged with **17j'** (131.6 mg, 0.4 mmol, 1.0 equiv). The flask was degassed and refilled with  $\text{N}_2$  for three times. Then  $\text{SmI}_2$  (0.1 M in THF, 8 mL, 0.8 mmol, 2.0 equiv) was added dropwise under  $\text{N}_2$  atmosphere. The resulting mixture was stirred at room temperature for 5 min and then the reaction was quenched by the addition of a saturated aqueous solution of  $\text{Na}_2\text{S}_2\text{O}_3$ . The organic layer was separated and the aqueous layer was extracted with EtOAc. The combined organic solvent was dried over  $\text{Na}_2\text{SO}_4$  and filtered off. The filtrate was concentrated under reduced pressure. The residue was dissolved in THF (4 mL) Then NaH (48 mg, 60% dispersion in mineral oil, 1.2 mmol, 3.0 equiv) was added. The resulting mixture was allowed to stir at room temperature for 30 min and then methyl iodide (170.4 mg, 1.2 mmol, 3.0 equiv) was added. The resulting mixture was allowed to stir at room temperature overnight. The reaction was quenched by the addition of a saturated aqueous solution of  $\text{NH}_4\text{Cl}$ . The organic layer was separated and the aqueous layer was extracted with EtOAc. The combined organic solvent was dried over  $\text{Na}_2\text{SO}_4$  and filtered off. The filtrate was concentrated under reduced pressure. Purification by column chromatography (50% EtOAc in hexanes) gave **17j'-S2** as a colorless oil (105.2 mg, 84% yield);  $R_f = 0.20$  (67% EtOAc in hexanes);  $^1\text{H}$  NMR (400 MHz,  $\text{CDCl}_3$ , signals for the minor diastereoisomer are reported in *italics*):  $\delta$  6.95–6.75 (m, 3H, both), 3.86 (s, 3H, both), 3.84 (s, 3H), 3.83 (s, 3H), 3.69 (d,  $J = 8.0$  Hz, 1H, both), 2.98 (s, 3H), 2.94 (s, 3H), 2.63 (d,  $J = 16.4$  Hz, 1H), 2.61 (d,  $J = 16.4$  Hz, 1H), 2.51 (d,  $J = 16.4$  Hz, 1H), 2.49 (d,  $J = 16.4$  Hz, 1H), 2.18 (d,  $J = 2.4$  Hz, 1H), 2.11 (d,  $J = 2.4$  Hz, 1H), 2.00–1.40 (m, 6H, both);  $^{13}\text{C}$  NMR (125 MHz,  $\text{CDCl}_3$ , signals for the minor diastereoisomer are reported in *italics*):  $\delta$  174.5, 173.2, 148.9, 148.7, 147.70, 147.66, 138.6, 137.1, 118.2, 117.8, 110.9, 110.8, 109.8, 109.6, 85.8, 84.4, 72.0, 71.1, 68.9, 65.4, 55.9 (both), 55.8 (both), 45.9, 44.4, 43.5, 41.4, 34.2, 33.2, 32.6, 29.8, 29.0, 28.9, 28.8, 26.5, 20.5, 20.1; IR (neat): 2934, 1683, 1518, 1450, 1252, 1150, 1024  $\text{cm}^{-1}$ ; HRMS ( $m/z$ ) Calcd for ( $\text{C}_{19}\text{H}_{23}\text{NO}_3$ ) ( $[\text{M}+\text{H}]^+$ ): 314.1751; found: 314.1755.

To a solution of **17j'-S2** (46.95 mg, 0.15 mmol, 1.0 equiv) in THF (1 mL) was added  $\text{Rh}(\text{acac})(\text{cod})$  (0.93 mg, 0.003 mmol, 2 mol %). Then  $\text{PhSiH}_3$  (0.075 mL, 0.6 mmol, 4.0 equiv) was added dropwise. The resulting solution was allowed to stir at 50 °C for 0.5 h. The solvent was removed under reduced pressure. Purification by column chromatography (33% EtOAc in hexanes containing 5% TEA) gave **18j'** as a colorless oil (38.9 mg, 86% yield);  $R_f = 0.42$  (33% EtOAc in hexanes containing 5% TEA);  $^1\text{H}$  NMR (400 MHz,  $\text{CDCl}_3$ , signals for the minor diastereoisomer are reported in *italics*):  $\delta$  7.05–6.75 (m, 3H, both), 3.88 (s, 3H), 3.87 (s, 3H), 3.85 (s, 3H, both), 3.35–3.25 (m, 1H), 3.20–3.10 (m, 1H), 2.95–2.85 (m, 1H, both), 2.75–2.55 (m, 2H, both), 2.50–2.30 (m, 3H, both), 2.10–1.40 (m, 9H, both);  $^{13}\text{C}$  NMR (125 MHz,  $\text{CDCl}_3$ ,

signals for the minor diastereoisomer are reported in *italics*):  $\delta$  148.8, 148.3, 147.1, 147.0, 140.0, 138.1, 118.9, 118.7, 110.9 (both), 110.4 (both), 87.8, 87.0, 73.1, 71.0, 69.9, 69.5, 56.0 (both), 55.8 (both), 55.0, 53.9, 49.1, 48.0, 43.3, 41.8, 40.6, 40.1, 33.9, 33.2, 29.1, 28.7, 26.6 (both), 22.8, 19.6; IR (neat): 3284, 2933, 2832, 2781, 1517, 1452, 1249, 1146, 1026, 765, 641  $\text{cm}^{-1}$ ; HRMS (m/z) Calcd for ( $\text{C}_{19}\text{H}_{23}\text{NO}_2$ ) ( $[\text{M}+\text{H}]^+$ ): 300.1958; found: 300.1962.

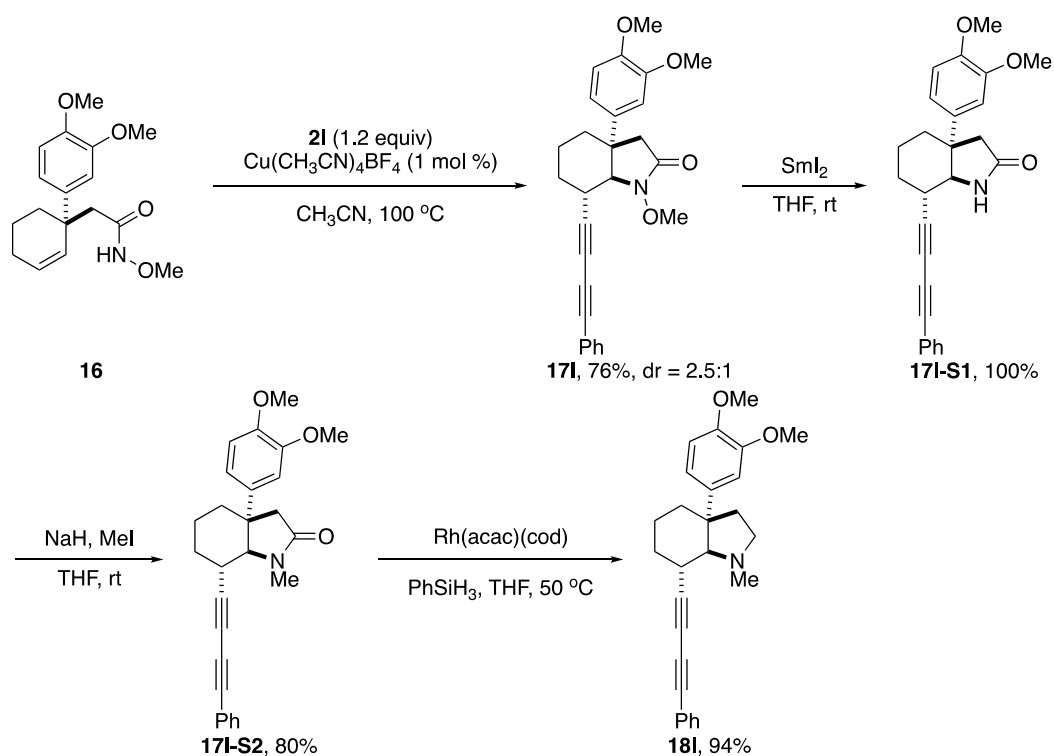

To a reaction tube charged with **16** (91.5 mg, 0.3 mmol, 1.0 equiv) and hypervalent iodine reagent **2I** (133.9 mg, 0.36 mmol, 1.2 equiv), was added  $\text{Cu}(\text{CH}_3\text{CN})_4\text{BF}_4$  (0.95 mg, 0.003 mmol, 1 mol %) and  $\text{CH}_3\text{CN}$  (1.5 mL). The reaction tube was capped and the resulting mixture was allowed to stir at  $100\text{ }^\circ\text{C}$  for 12 h. After cooling down to room temperature, the reaction mixture was filtered through a pad of  $\text{Al}_2\text{O}_3$  and washed with EtOAc (15 mL). The filtrate was concentrated *in vacuo*. The resulting crude mixture was subject to flash column chromatography to provide the aminoalkynylation product **17I** as a mixture of separable diastereomers (90.5 mg, 76% yield, d.r. = 2.5:1 detected by crude  $^1\text{H}$  NMR, relative stereochemistry of **17I** was determined by the X-ray structure of both diastereomers).

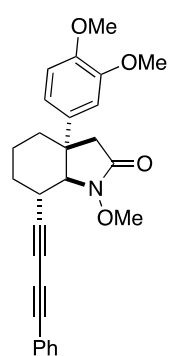

**17I-major**: brown solid;  $R_f$  = 0.35 (50% EtOAc in hexanes);  $^1\text{H}$  NMR (500 MHz,  $\text{CDCl}_3$ ):  $\delta$  7.39 (d,  $J$  = 7.5 Hz, 2H), 7.33–7.20 (m, 3H), 7.03–6.93 (m, 2H), 6.82 (d,  $J$  = 9.0 Hz, 1H), 4.20 (d,  $J$  = 3.5 Hz, 1H), 3.90 (s, 3H), 3.80 (s, 3H), 3.77 (s, 3H), 3.11 (q,  $J$  = 3.5 Hz, 1H), 2.54 (d,  $J$  = 17.0 Hz, 1H), 2.43 (d,  $J$  = 17.0 Hz, 1H), 2.25–2.15 (m, 1H), 1.94–1.80 (m, 2H), 1.80–1.64 (m, 2H), 1.63–1.49 (m, 1H);  $^{13}\text{C}$  NMR (125 MHz,  $\text{CDCl}_3$ ):  $\delta$  170.1, 148.7, 147.7, 136.5, 132.2, 128.8, 128.1, 121.3, 118.4, 110.8, 110.0, 83.7, 76.1, 73.3, 67.5, 64.7, 62.4, 55.9, 55.6, 43.7, 39.9, 33.0, 28.8, 25.6, 18.6; IR (neat): 2939, 1715, 1515, 1442, 1243, 1229, 1144, 1022, 750, 686  $\text{cm}^{-1}$ ; HRMS (m/z) Calcd for ( $\text{C}_{27}\text{H}_{28}\text{NO}_4$ ) ( $[\text{M}+\text{H}]^+$ ): 430.2013;

found: 430.2008.

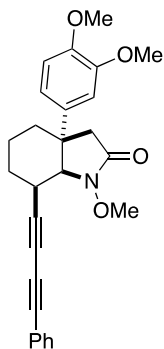

**171-minor**: brown solid;  $R_f = 0.40$  (50% EtOAc in hexanes);  $^1\text{H NMR}$  (500 MHz,  $\text{CDCl}_3$ ):  $\delta$  7.34–7.27 (m, 2H), 7.22–7.07 (m, 3H), 6.76–6.60 (m, 3H), 4.16–4.10 (m, 1H), 3.76 (s, 3H), 3.72 (s, 3H), 3.70 (s, 3H), 2.96–2.86 (m, 1H), 2.36 (d,  $J = 17.0$  Hz, 1H), 2.30 (d,  $J = 17.0$  Hz, 1H), 1.97–1.90 (m, 1H), 1.81–1.55 (m, 4H), 1.36–1.24 (m, 1H);  $^{13}\text{C NMR}$  (125 MHz,  $\text{CDCl}_3$ ):  $\delta$  172.2, 149.1, 147.9, 135.4, 132.4, 128.9, 128.2, 121.6, 118.2, 111.0, 109.6, 83.5, 76.2, 73.7, 66.9, 63.5, 62.8, 56.0, 55.8, 45.1, 40.6, 33.4, 29.5, 26.4, 21.0; IR (neat): 2937, 1719, 1517, 1441, 1258, 1232, 1148, 1021, 758, 693  $\text{cm}^{-1}$ ; HRMS ( $m/z$ ) Calcd for ( $\text{C}_{27}\text{H}_{28}\text{NO}_4$ ) ( $[\text{M}+\text{H}]^+$ ): 430.2013; found: 430.2008.

A 25 mL round-bottomed flask was charged with **171-major** (82.6 mg, 0.2 mmol, 1.0 equiv). The flask was degassed and refilled with  $\text{N}_2$  for three times. Then  $\text{SmI}_2$  (0.1 M in THF, 4 mL, 0.4 mmol, 2.0 equiv) was added dropwise under  $\text{N}_2$  atmosphere. The resulting mixture was stirred at room temperature for 5 min and then the reaction was quenched by the addition of a saturated aqueous solution of  $\text{Na}_2\text{S}_2\text{O}_3$ . The organic layer was separated and the aqueous layer was extracted with EtOAc. The combined organic solvent was dried over  $\text{Na}_2\text{SO}_4$  and filtered off. The filtrate was concentrated under reduced pressure to give **171-S1** as a yellow oil (80.4 mg, 100% yield);  $R_f = 0.14$  (50% EtOAc in hexanes);  $^1\text{H NMR}$  (500 MHz,  $\text{CDCl}_3$ ):  $\delta$  7.44 (d,  $J = 7.0$  Hz, 2H), 7.38–7.24 (m, 3H), 6.96 (d,  $J = 8.5$  Hz, 1H), 6.93 (s, 1H), 6.82 (d,  $J = 8.5$  Hz, 1H), 6.74 (s, br, 1H), 3.94–3.86 (s, 4H), 3.82 (s, 3H), 2.74–2.64 (m, 1H), 2.64–2.52 (m, 2H), 2.01–1.85 (m, 3H), 1.85–1.72 (m, 1H), 1.60–1.45 (m, 2H);  $^{13}\text{C NMR}$  (125 MHz,  $\text{CDCl}_3$ ):  $\delta$  176.1, 148.7, 147.7, 138.0, 132.3, 129.0, 128.2, 121.4, 118.0, 110.8, 109.7, 84.3, 76.3, 73.5, 67.3, 62.5, 55.9, 55.7, 45.6, 41.7, 35.0, 34.1, 27.6, 20.5; IR (neat): 2933, 1693, 1517, 1441, 1250, 1229, 1147, 1022, 753, 687  $\text{cm}^{-1}$ ; HRMS ( $m/z$ ) Calcd for ( $\text{C}_{26}\text{H}_{26}\text{NO}_3$ ) ( $[\text{M}+\text{H}]^+$ ): 400.1907; found: 400.1910.

To a solution of **171-S1** (60 mg, 0.15 mmol, 1.0 equiv) in THF (1.5 mL) was added NaH (18 mg, 60% dispersion in mineral oil, 0.45 mmol, 3.0 equiv). The resulting mixture was allowed to stir at room temperature for 30 min and then methyl iodide (63.9 mg, 0.45 mmol, 3.0 equiv) was added. The resulting mixture was allowed to stir at room temperature overnight. The reaction was quenched by the addition of a saturated aqueous solution of  $\text{NH}_4\text{Cl}$ . The organic layer was separated and the aqueous layer was extracted with EtOAc. The combined organic solvent was dried over  $\text{Na}_2\text{SO}_4$  and filtered off. The filtrate was concentrated under reduced pressure. Purification by column chromatography (50% EtOAc in hexanes) gave **171-S2** as a yellow oil (49.5 mg, 80% yield);  $R_f = 0.09$  (33% EtOAc in hexanes);  $^1\text{H NMR}$  (500 MHz,  $\text{CDCl}_3$ ):  $\delta$  7.46 (d,  $J = 7.5$  Hz, 2H), 7.39–7.27 (m, 3H), 6.92 (d,  $J = 8.5$  Hz, 1H), 6.88 (s, 1H), 6.82 (d,  $J = 8.5$  Hz, 1H), 3.90 (s, 3H), 3.83 (s, 3H), 3.77 (d,  $J = 8.0$  Hz, 1H), 2.98 (s, 3H), 2.75–2.69 (m, 1H), 2.64 (d,  $J = 16.5$  Hz, 1H), 2.57 (d,  $J = 16.5$  Hz, 1H), 2.00–1.76 (m, 4H), 1.65–1.49 (m, 2H);  $^{13}\text{C NMR}$  (125 MHz,  $\text{CDCl}_3$ , one carbon missing):  $\delta$  173.2, 148.8, 147.8, 138.4, 132.4, 129.1, 128.3, 121.5, 117.9, 110.9, 109.7, 84.7, 73.4, 68.7, 68.0, 56.0, 55.8, 44.3, 41.6, 34.1, 33.5, 29.6, 28.5, 20.5; IR (neat): 2932, 1689, 1517, 1441,

1392, 1250, 1149, 1025, 756, 729, 690  $\text{cm}^{-1}$ ; HRMS (m/z) Calcd for ( $\text{C}_{27}\text{H}_{28}\text{NO}_3$ ) ( $[\text{M}+\text{H}]^+$ ): 414.2064; found: 414.2066.

To a solution of **171-S2** (41.3 mg, 0.1 mmol, 1.0 equiv) in THF (1 mL) was added Rh(acac)(cod) (0.62 mg, 0.002 mmol, 2 mol %). Then PhSiH<sub>3</sub> (0.05 mL, 0.4 mmol, 4.0 equiv) was added dropwise. The resulting solution was allowed to stir at 50 °C for 0.5 h. The solvent was removed under reduced pressure. Purification by column chromatography (33% EtOAc in hexanes containing 5% TEA) gave **181** as a yellow oil (37.6 mg, 94% yield);  $R_f$  = 0.42 (50% EtOAc in hexanes containing 5% TEA); <sup>1</sup>H NMR (500 MHz, CDCl<sub>3</sub>):  $\delta$  7.43 (d,  $J$  = 7.0 Hz, 2H), 7.37–7.23 (m, 3H), 7.10–7.00 (m, 2H), 6.83 (d,  $J$  = 8.0 Hz, 1H), 3.95 (s, 3H), 3.80 (s, 3H), 3.20 (td,  $J$  = 9.0, 3.5 Hz, 1H), 2.99 (d,  $J$  = 4.5 Hz, 1H), 2.86 (q,  $J$  = 4.5 Hz, 1H), 2.47 (q,  $J$  = 9.0 Hz, 1H), 2.42 (s, 3H), 2.12–1.97 (m, 2H), 1.97–1.77 (m, 4H), 1.62–1.48 (m, 2H); <sup>13</sup>C NMR (125 MHz, CDCl<sub>3</sub>):  $\delta$  148.6, 147.2, 139.5, 132.4, 128.6, 128.2, 122.1, 119.0, 111.2, 110.6, 86.7, 75.4, 74.0, 72.9, 66.7, 56.2, 55.7, 53.8, 47.9, 41.5, 40.1, 33.5, 29.8, 25.9, 19.7; IR (neat): 2933, 1736, 1517, 1441, 1237, 1146, 1027, 755, 729, 689  $\text{cm}^{-1}$ ; HRMS (m/z) Calcd for ( $\text{C}_{27}\text{H}_{30}\text{NO}_2$ ) ( $[\text{M}+\text{H}]^+$ ): 400.2271; found: 400.2277.

## X. References

1. R. Frei, M. D. Wodrich, D. P. Hari, P.-A. Borin, C. Chauvier and J. Waser, *J. Am. Chem. Soc.*, 2014, **136**, 16563–16573.
2. H. Takahata, T. Takamatsu, Y. Chen, N. Ohkubo, T. Yamazaki and T. Momose, *J. Org. Chem.*, 1990, **55**, 3792–3797.
3. H. Takahata, T. Takamatsu and T. Yamazaki, *J. Org. Chem.*, 1989, **54**, 4812–4822.
4. B. Lu, J. Wu and N. Yoshikai, *J. Am. Chem. Soc.*, 2014, **136**, 11598–11601.
5. G. Chelucci, F. Capitta and S. Baldino, *Tetrahedron*, 2008, **64**, 10250–10257.

## X. NMR Spectra.

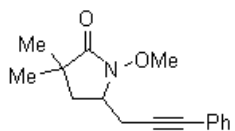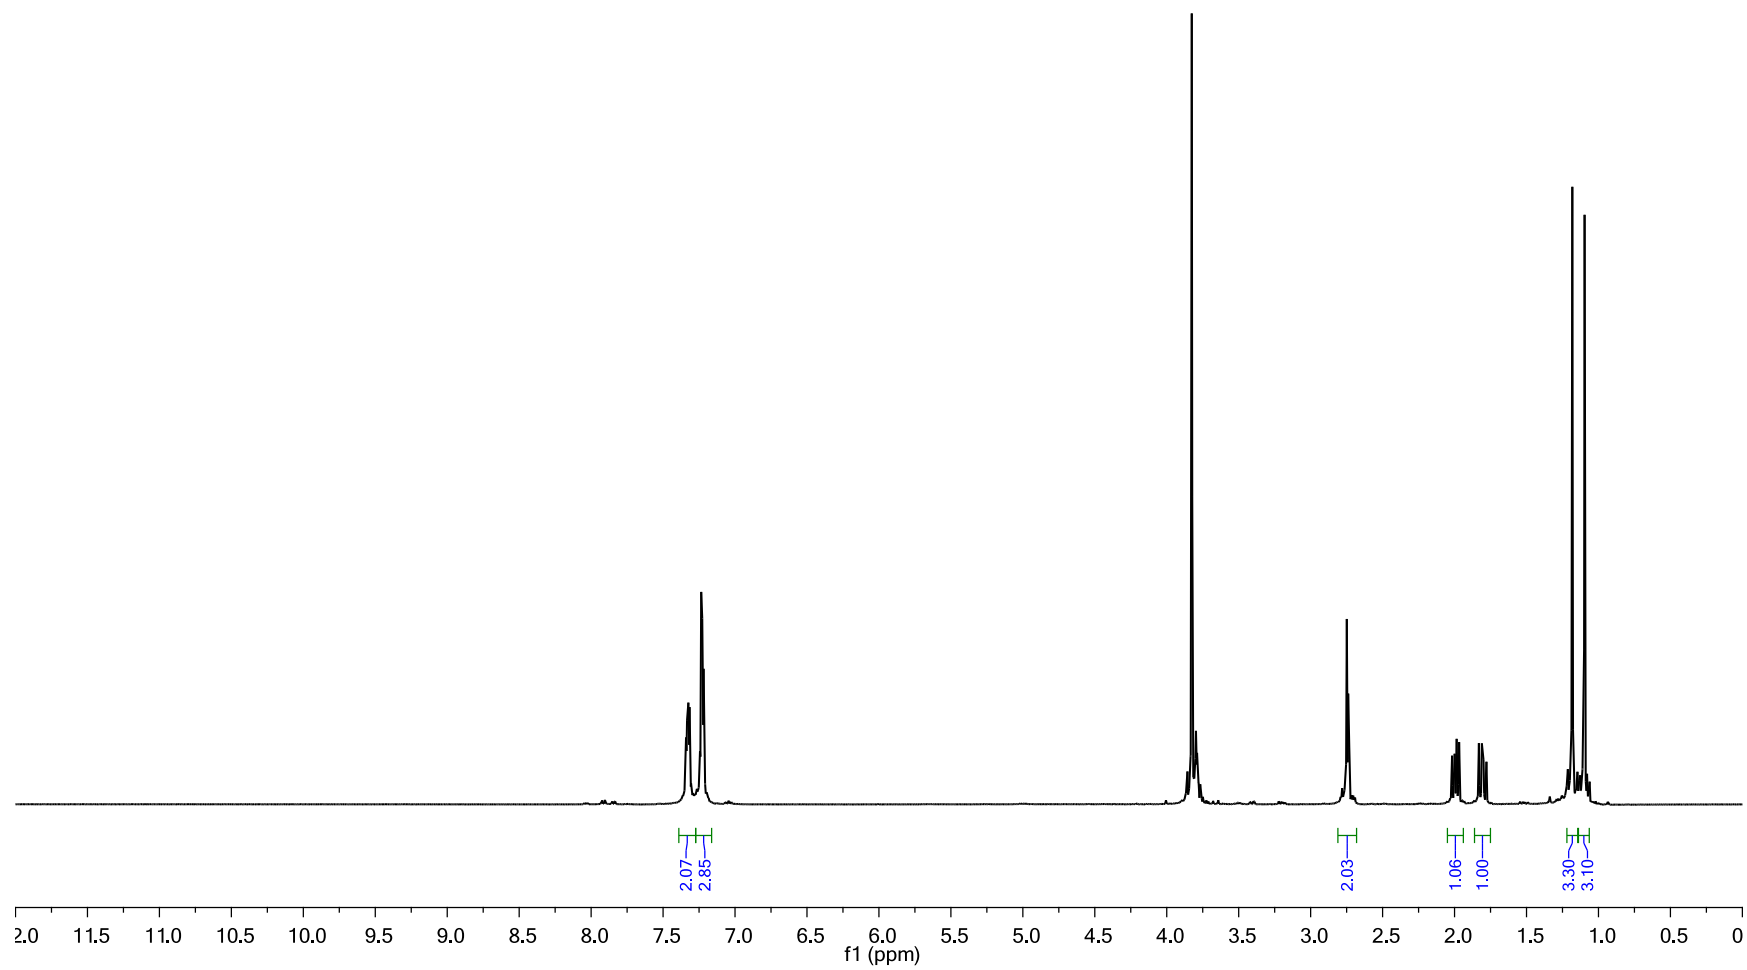

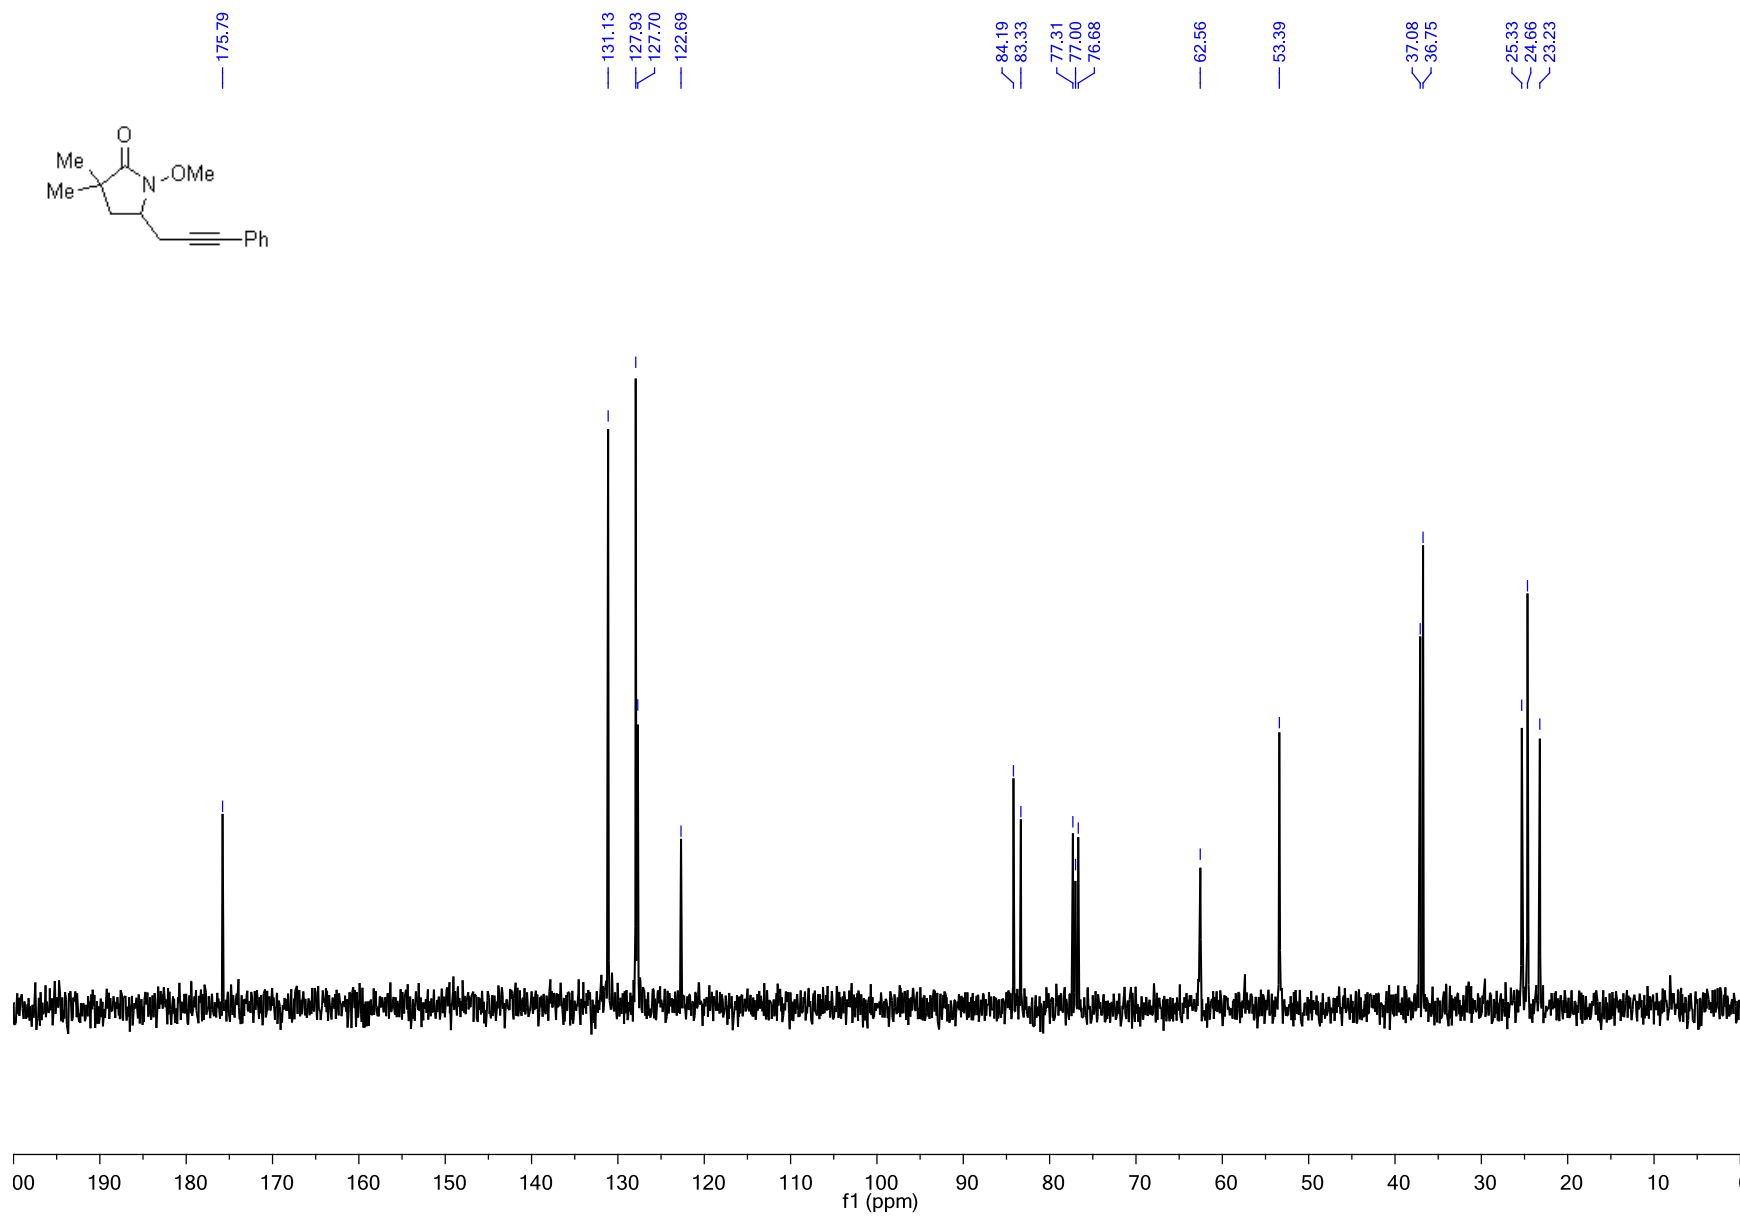



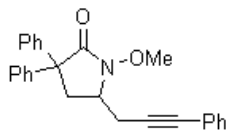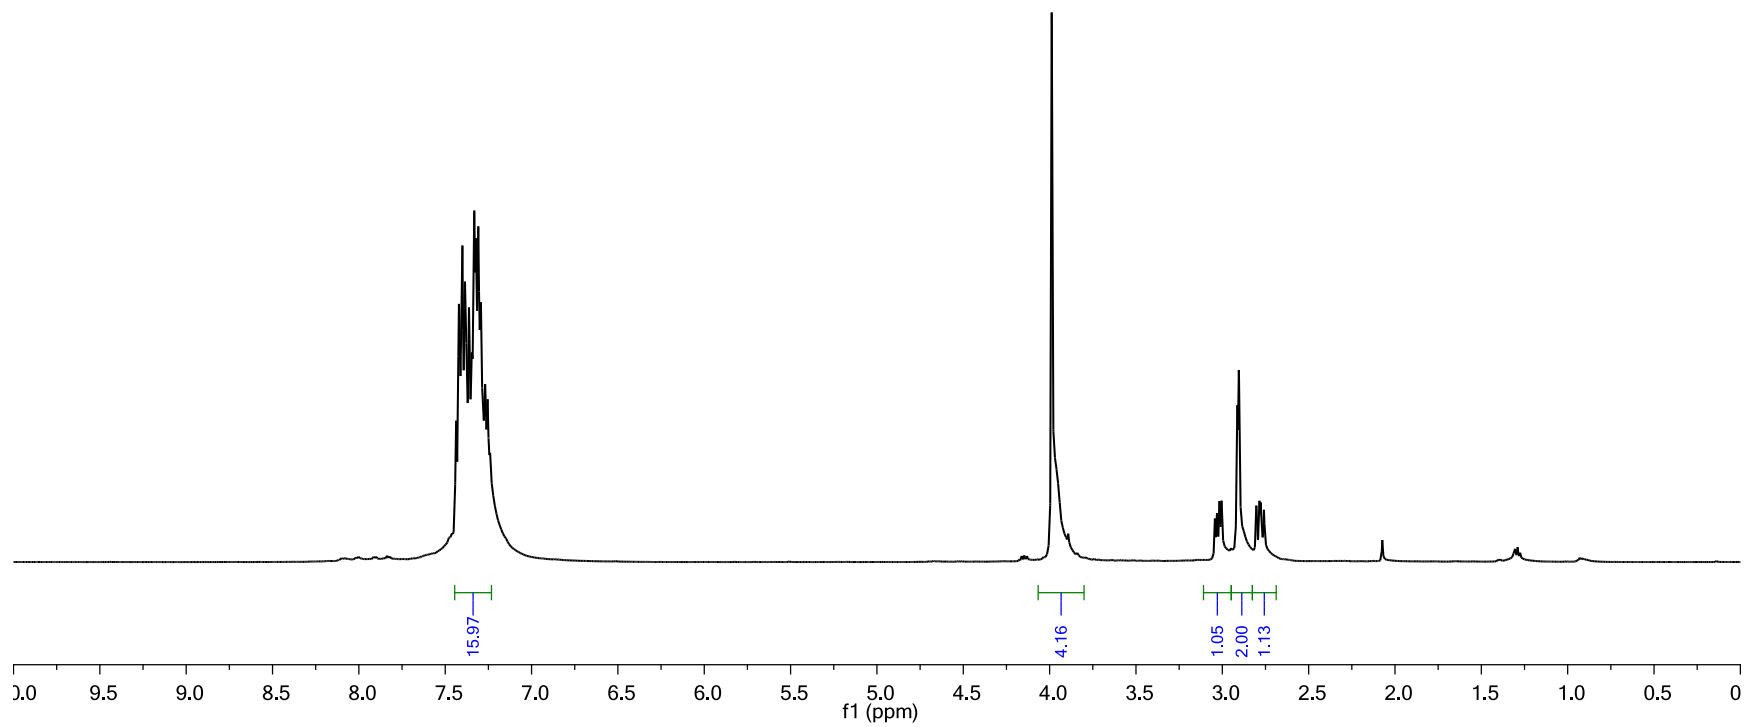

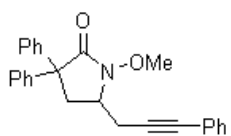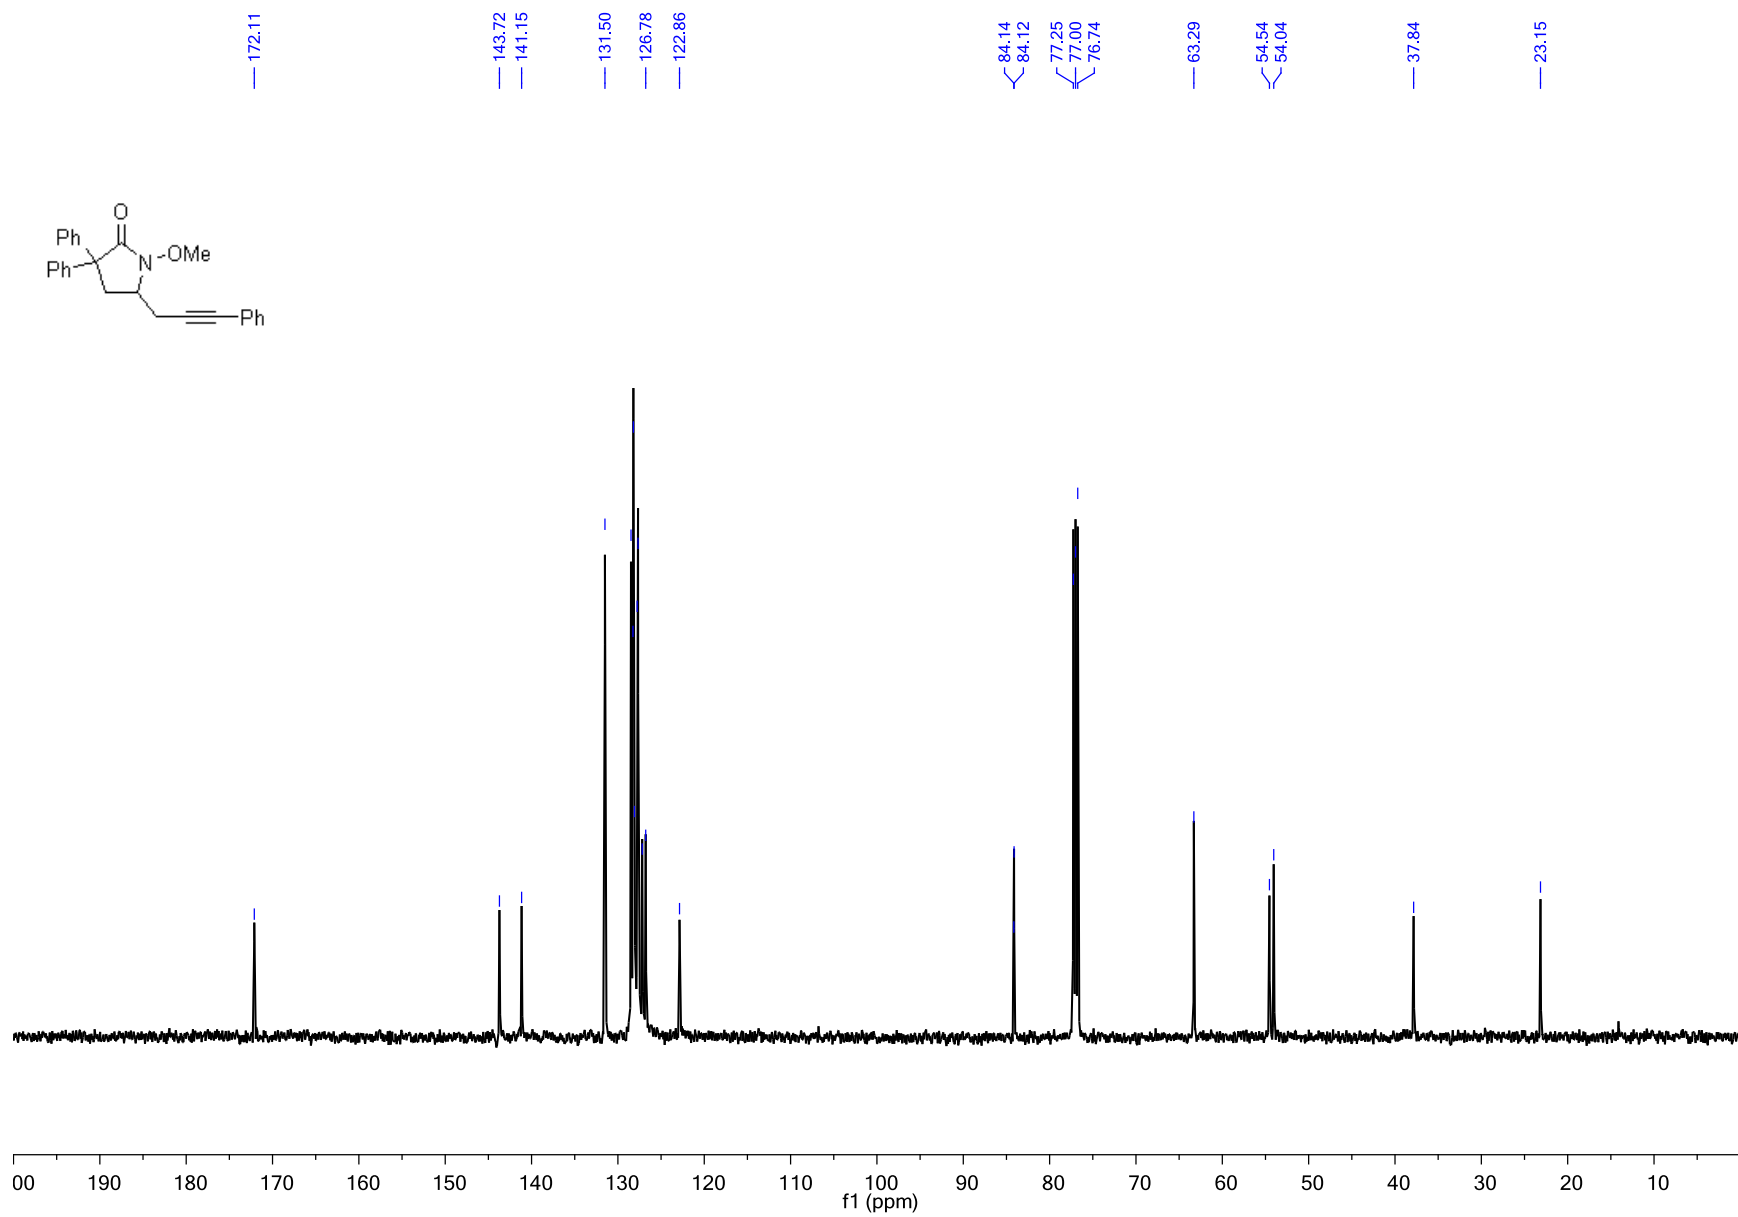

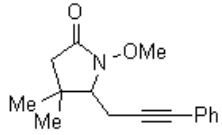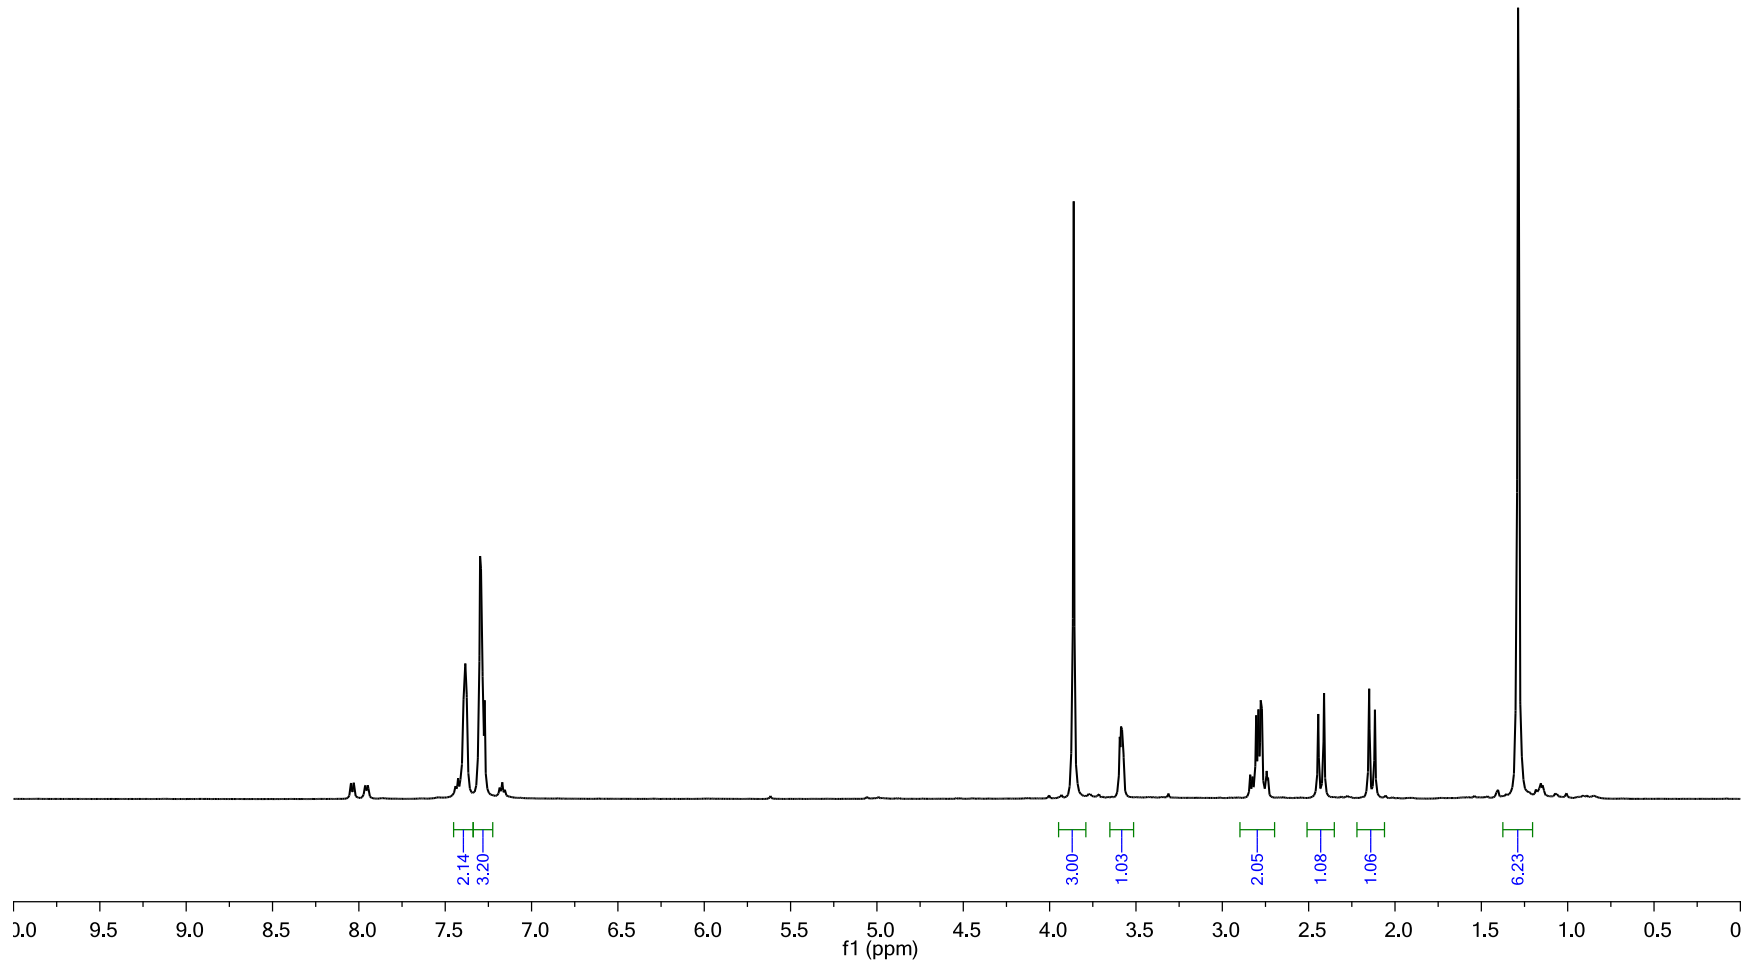

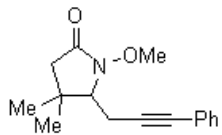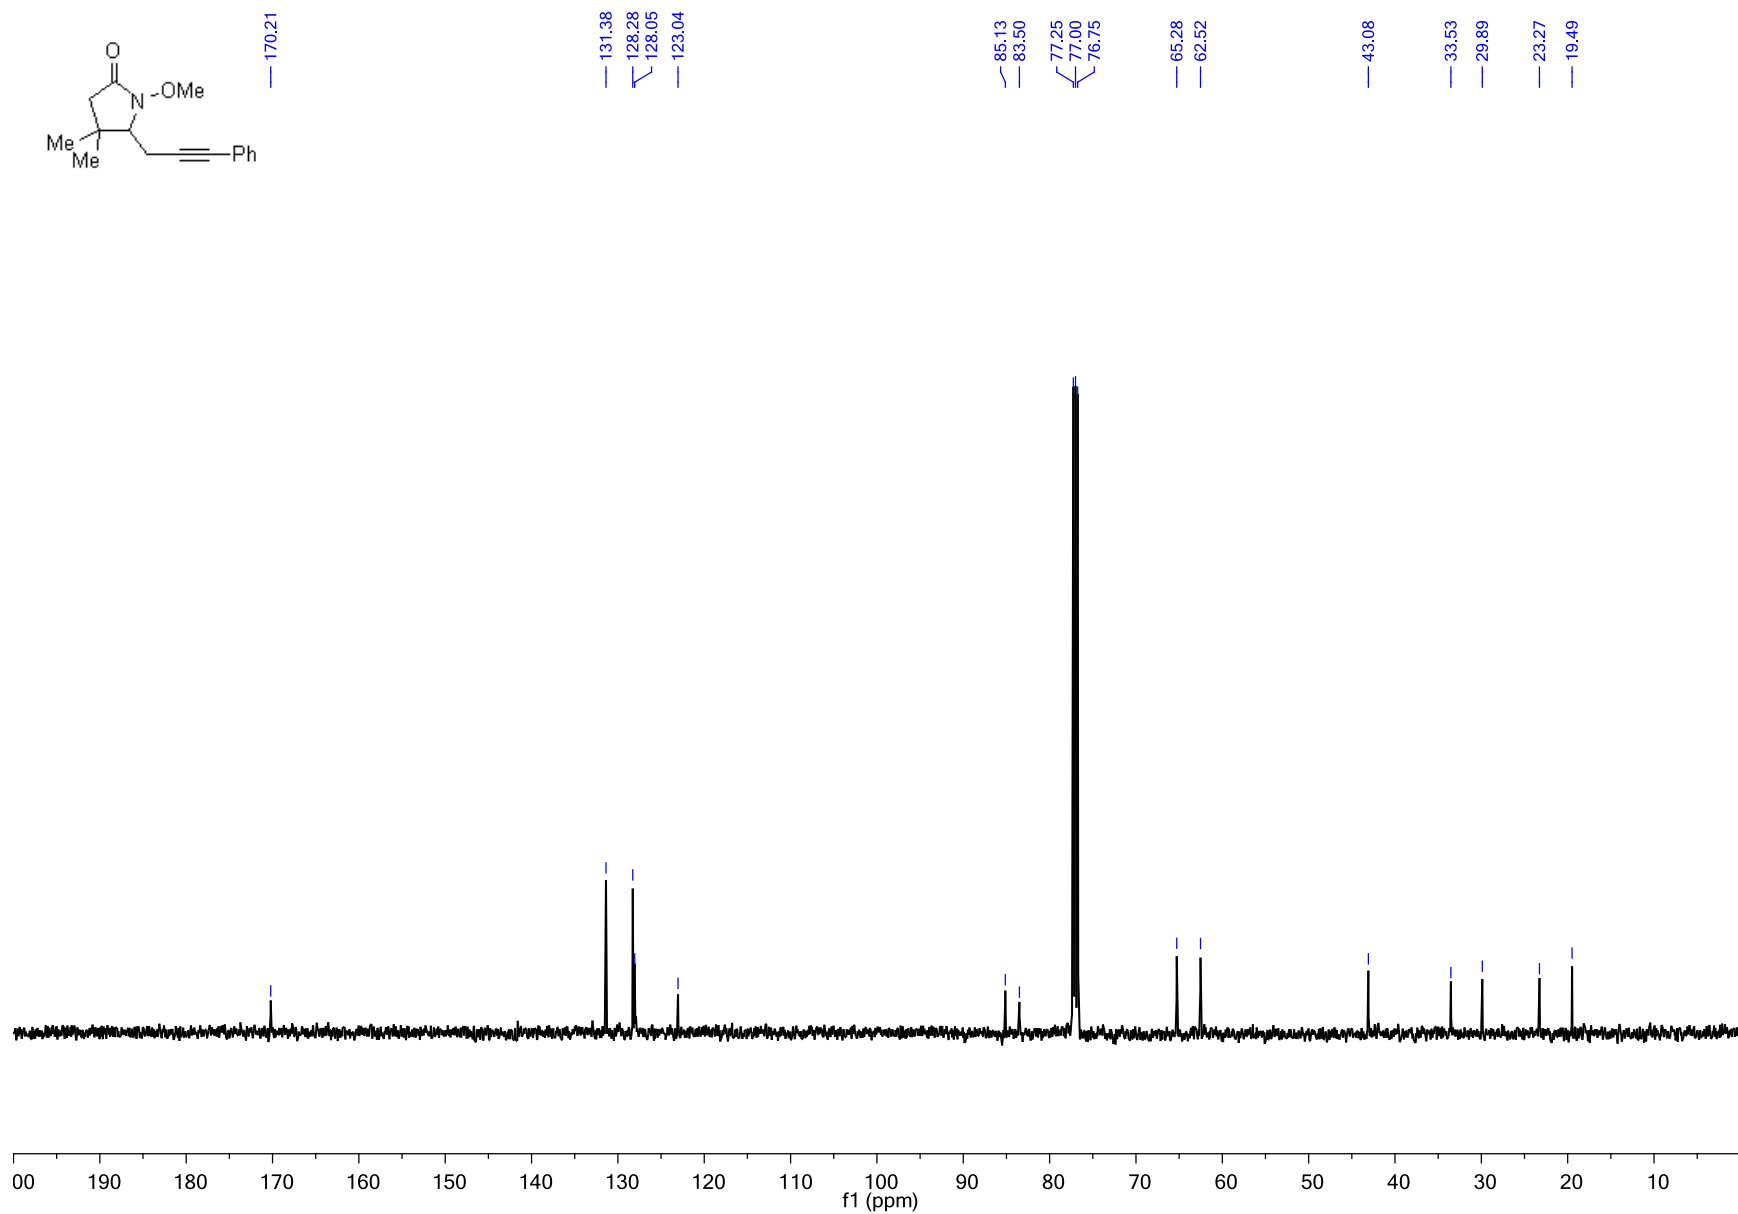

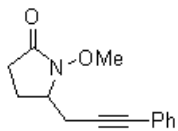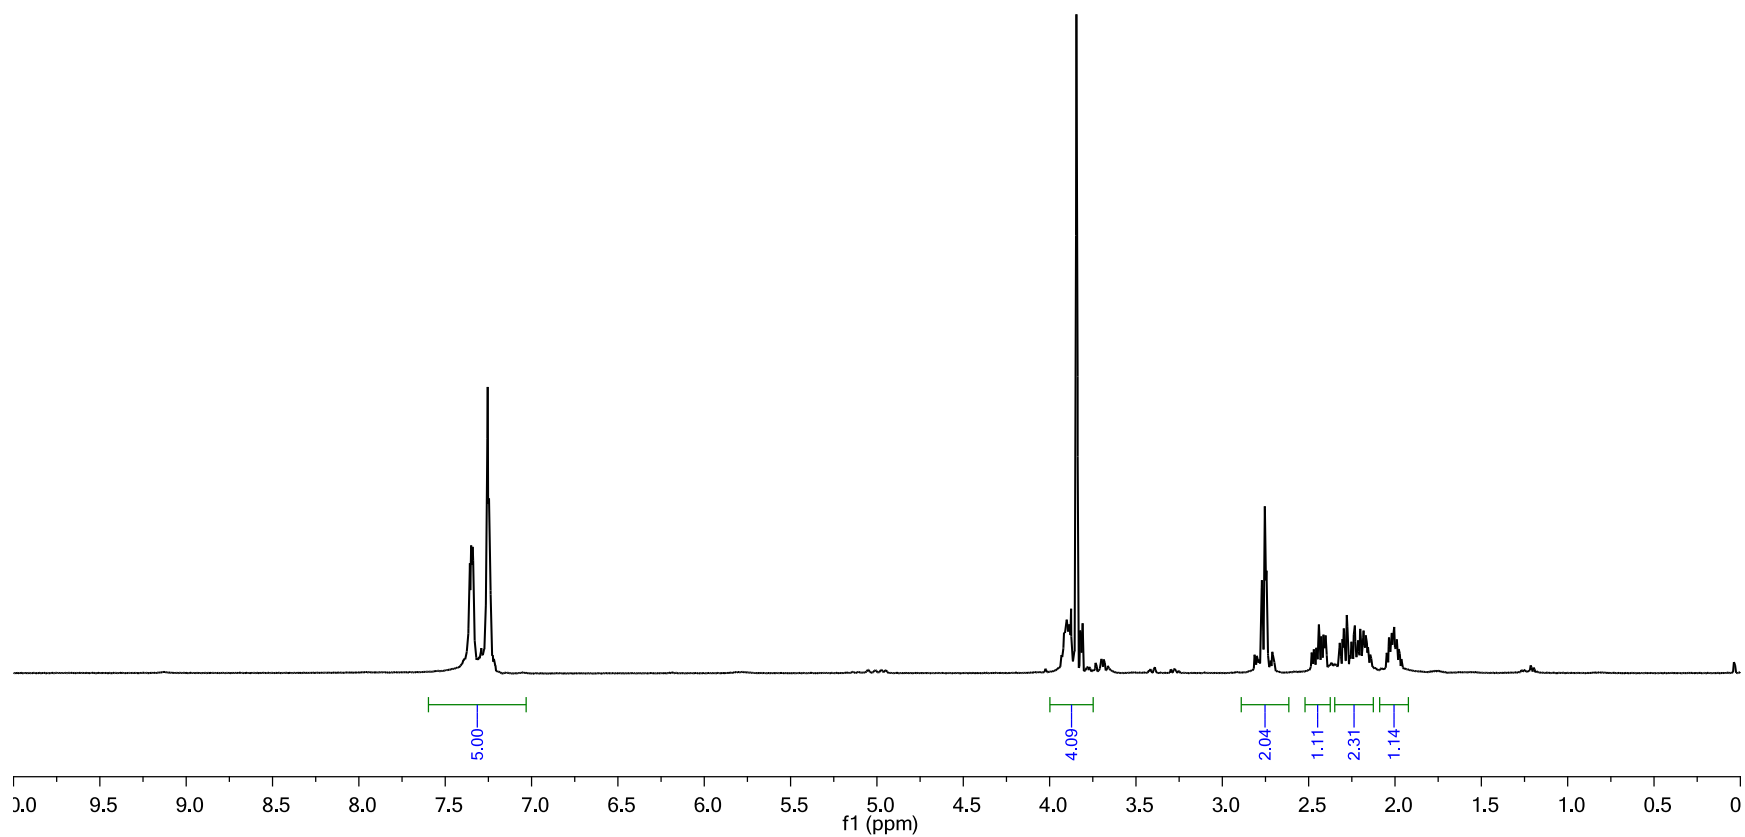

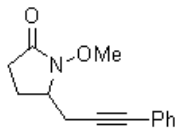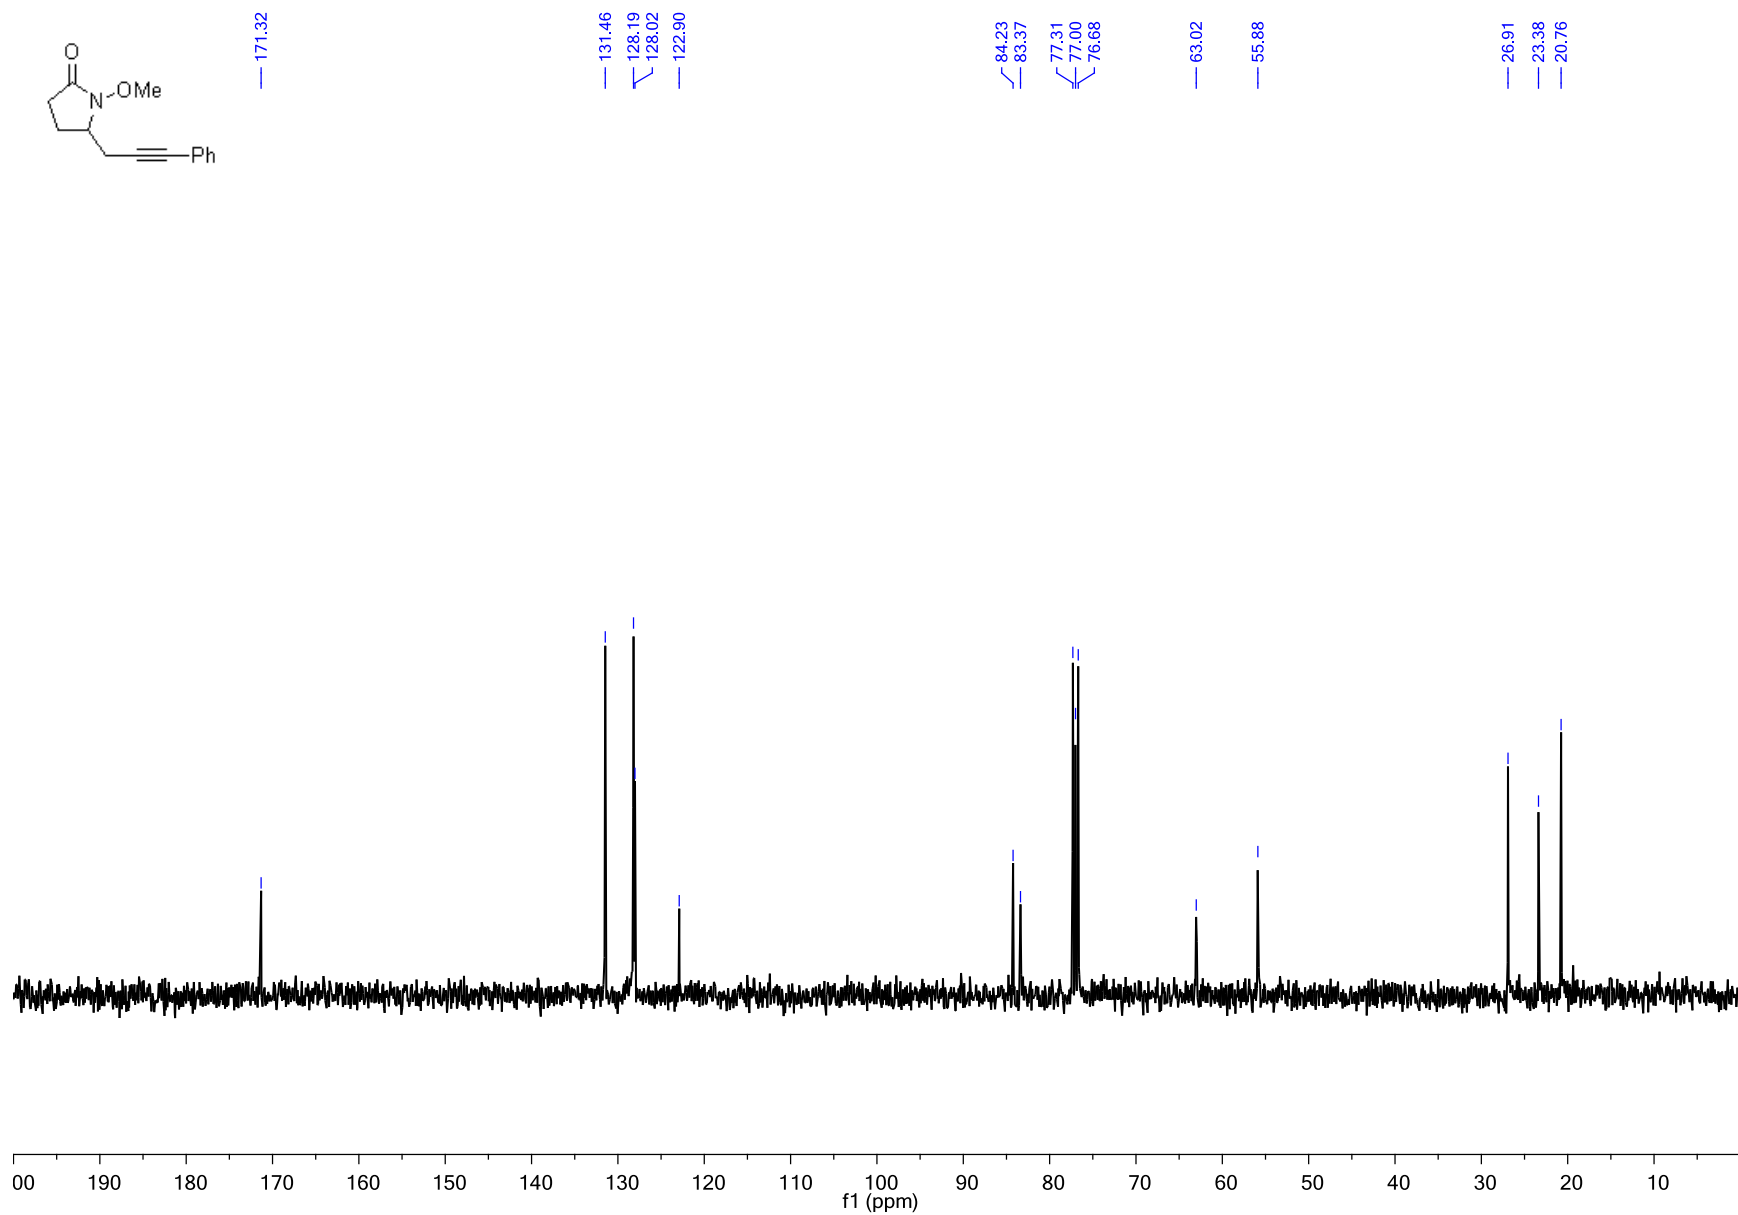

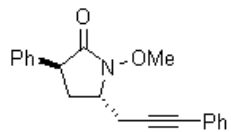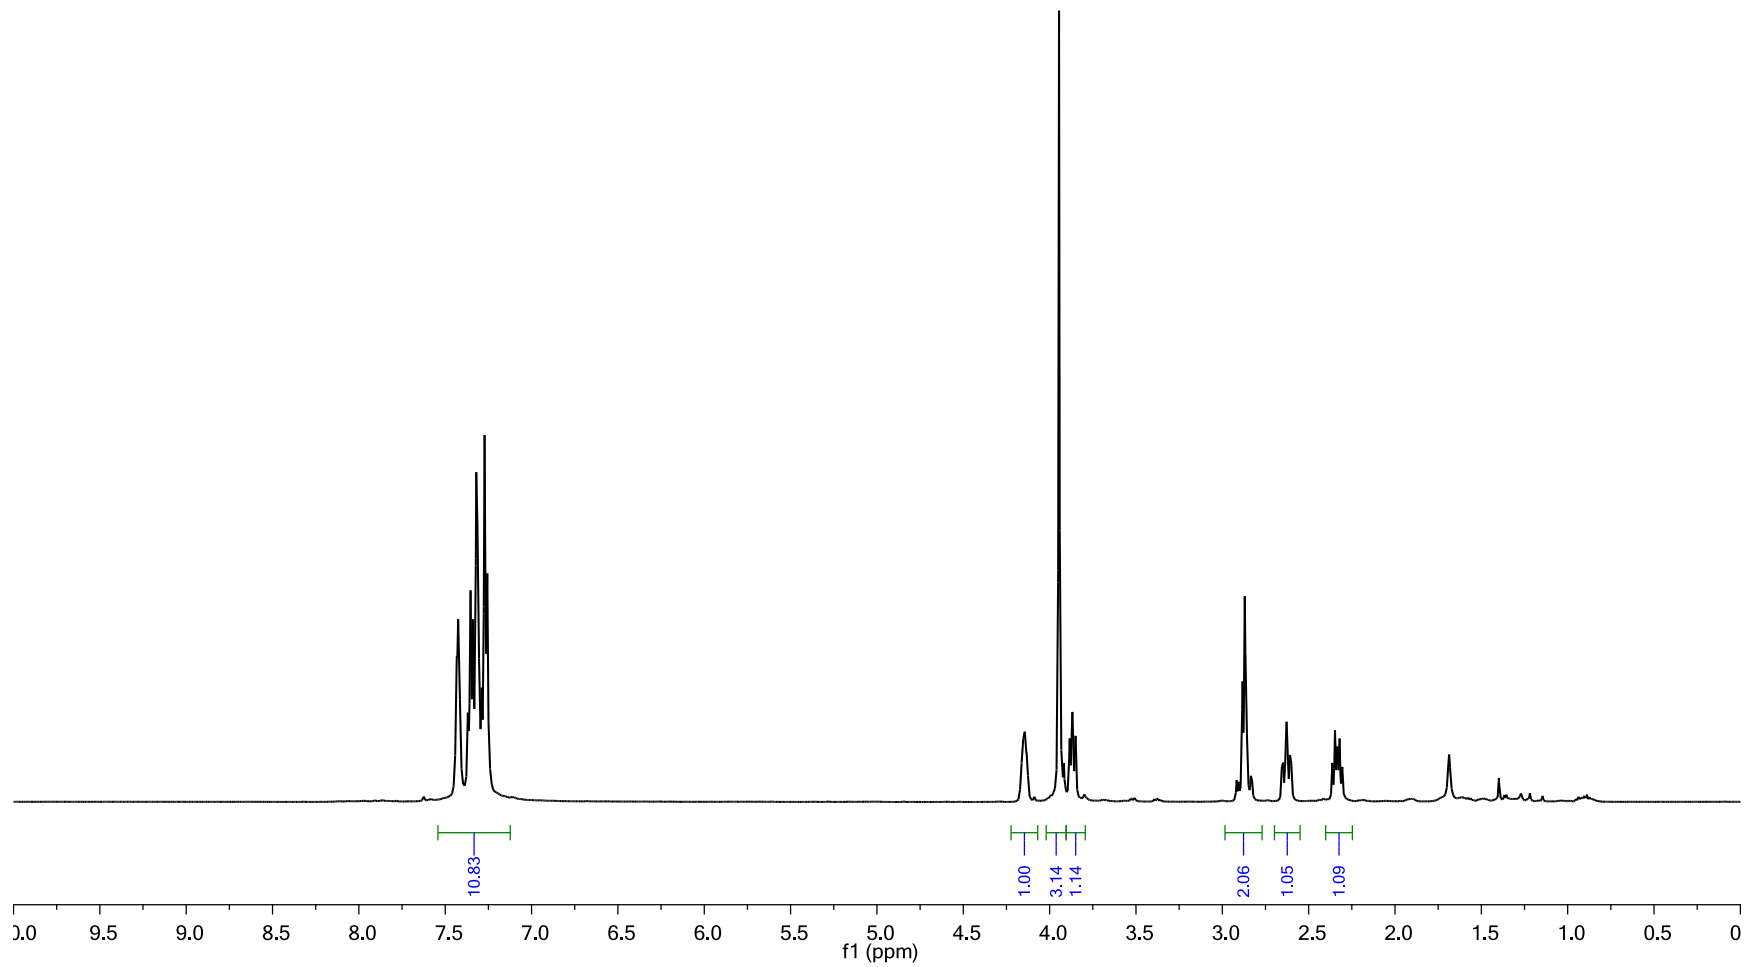

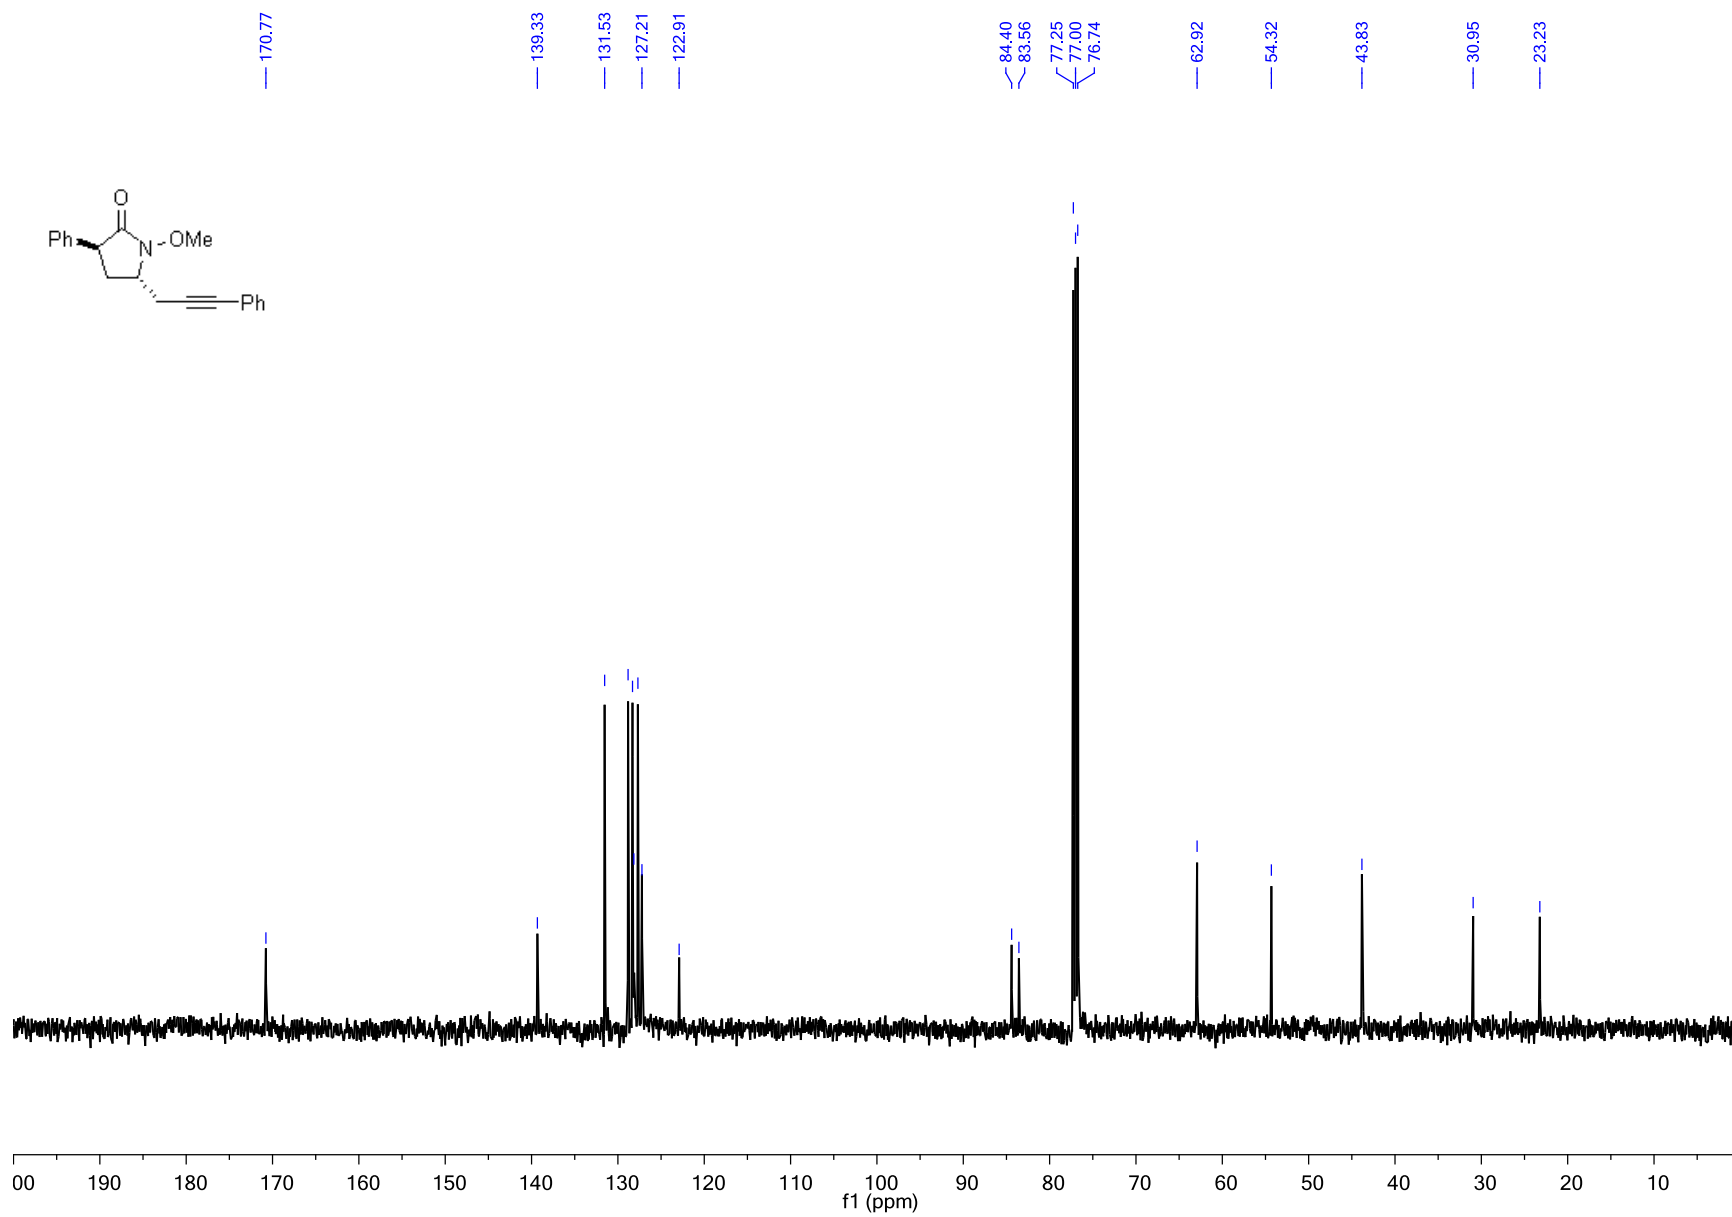



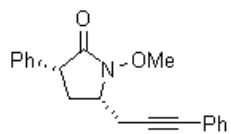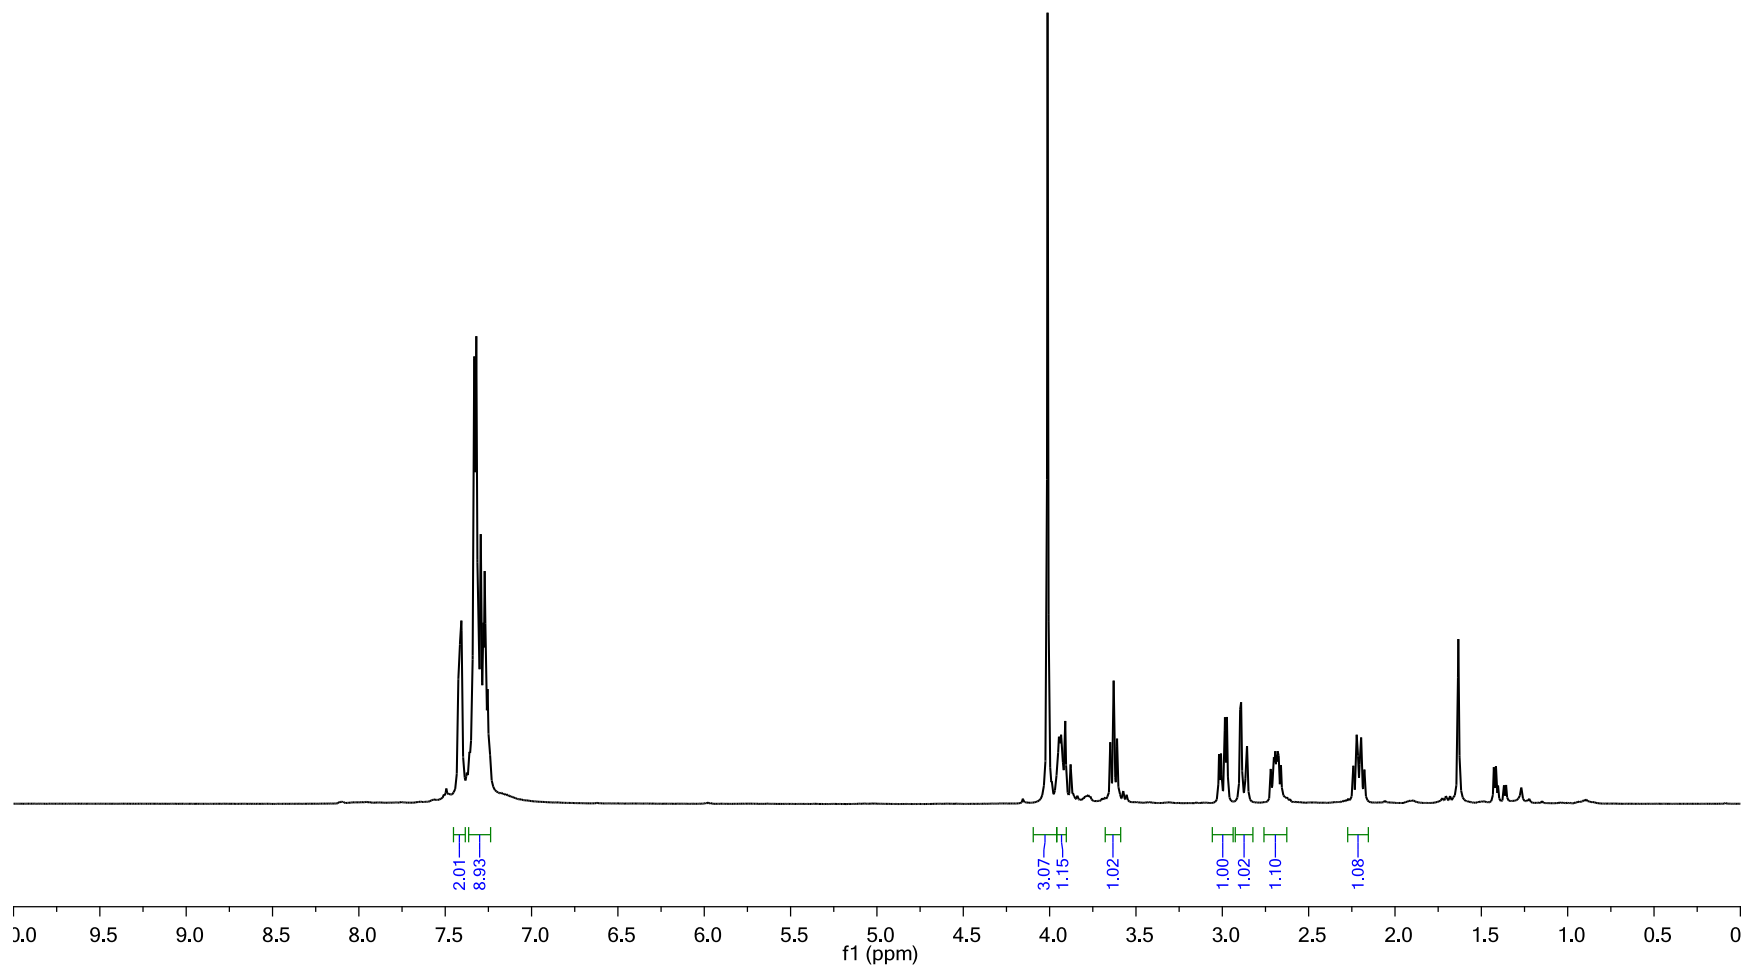

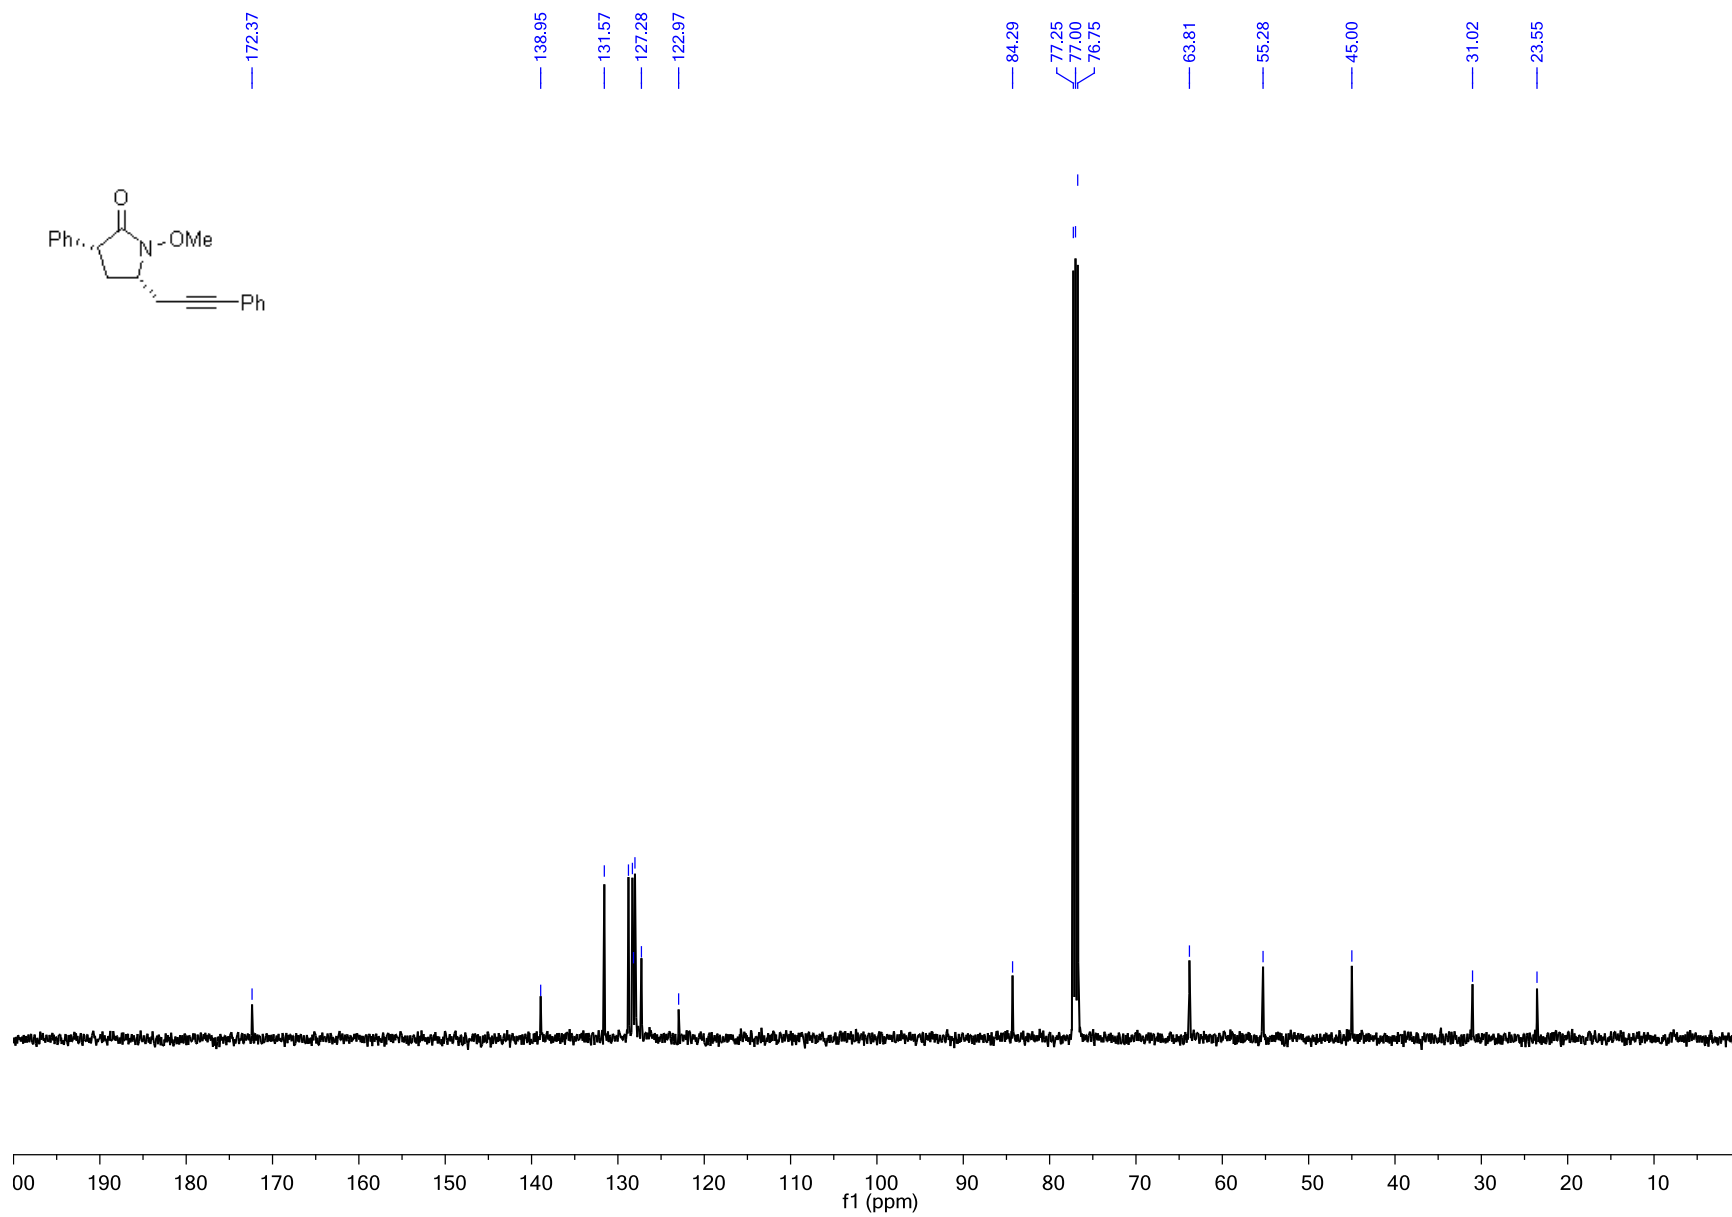

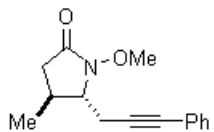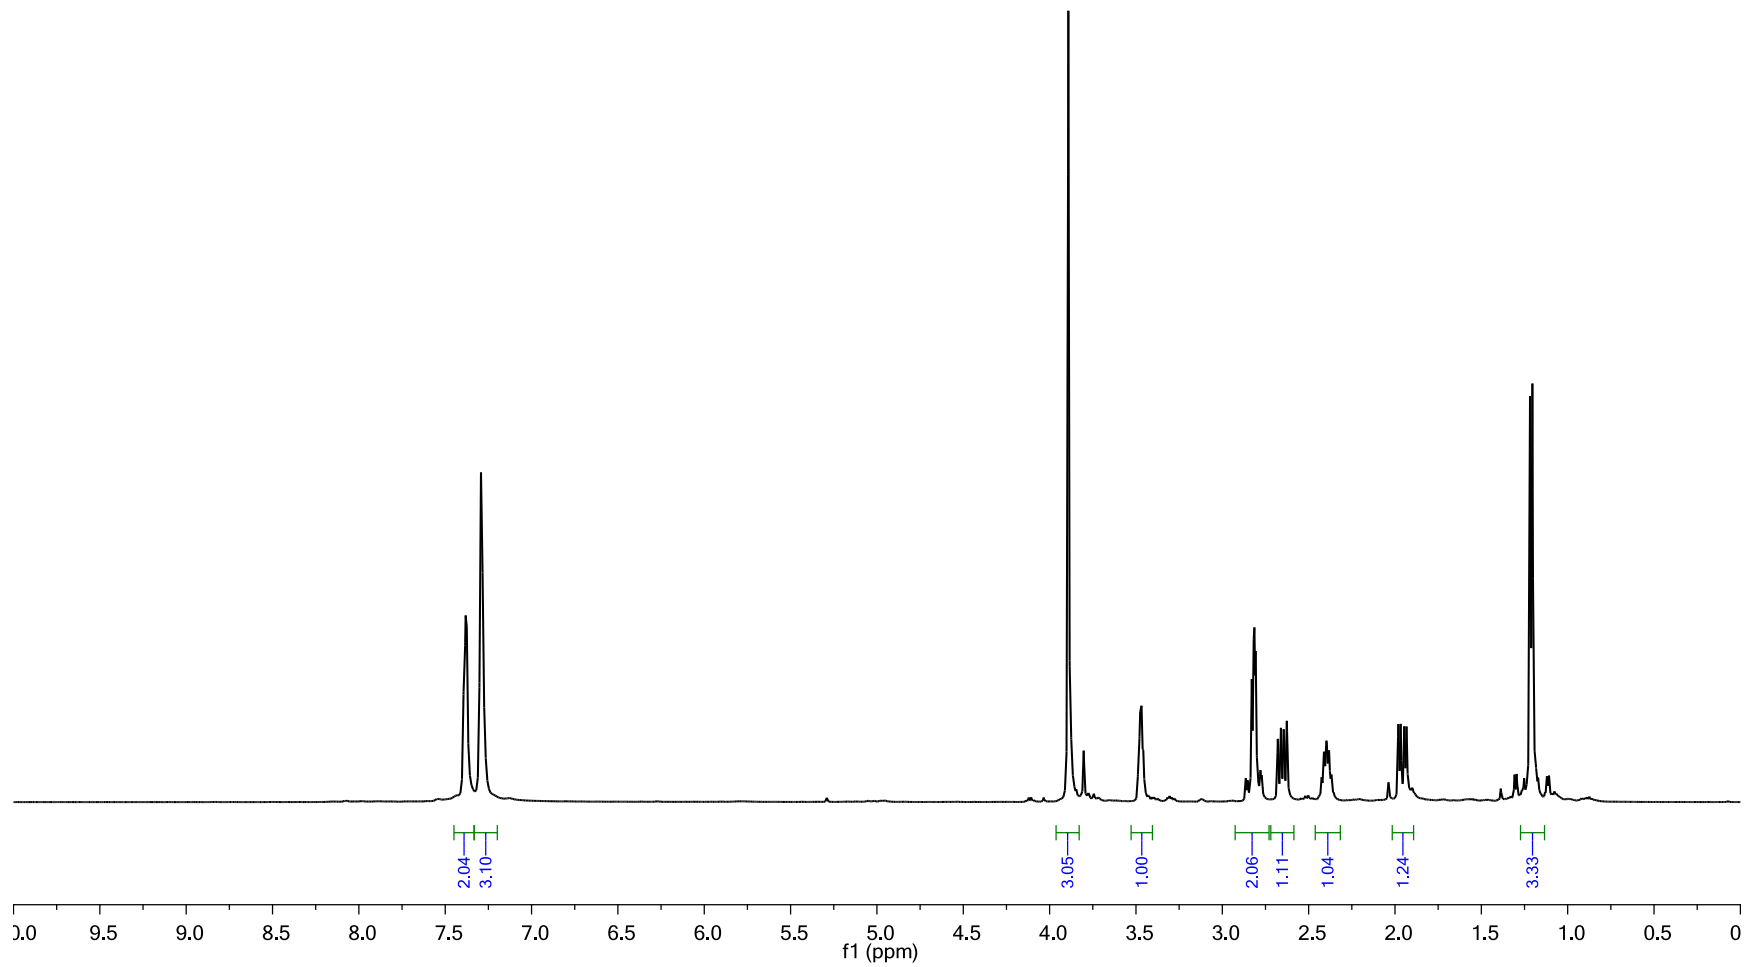

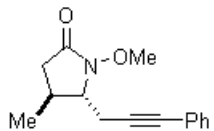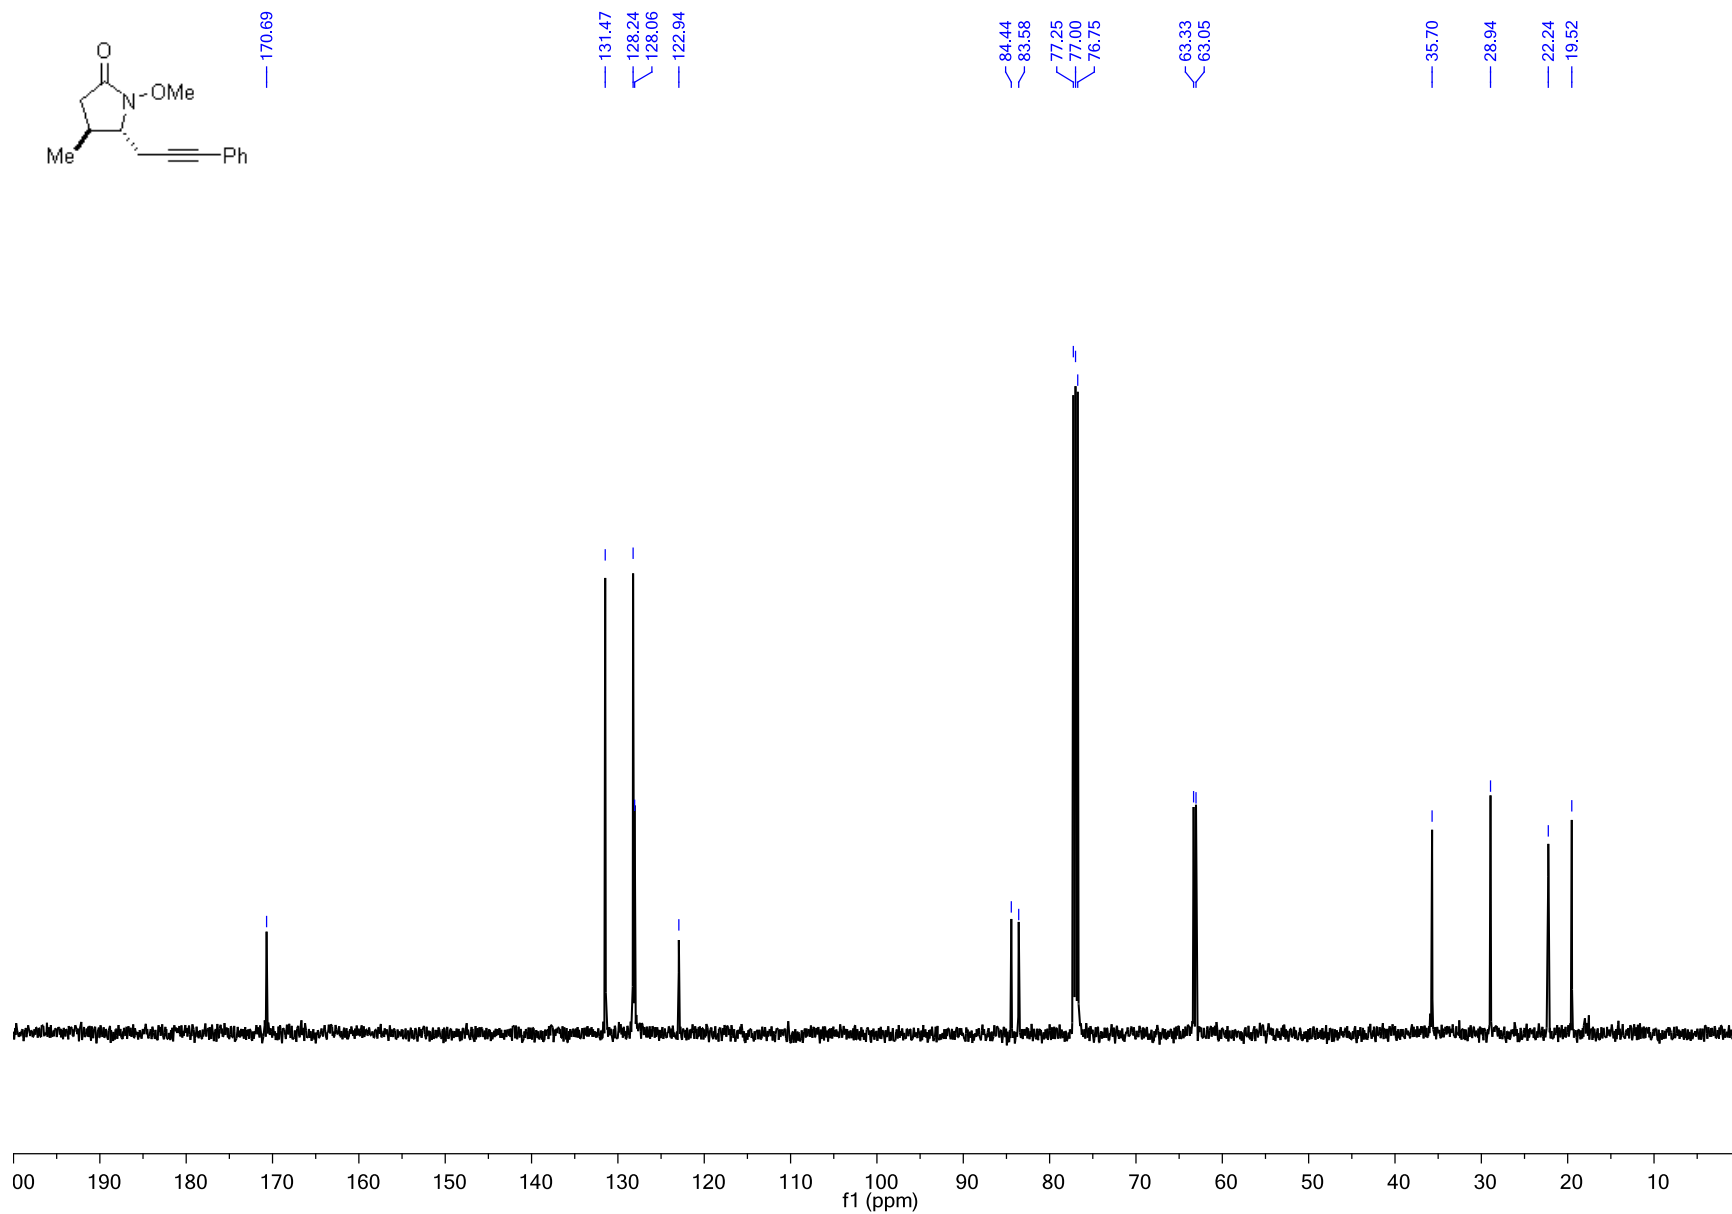

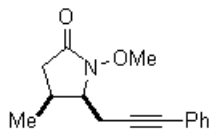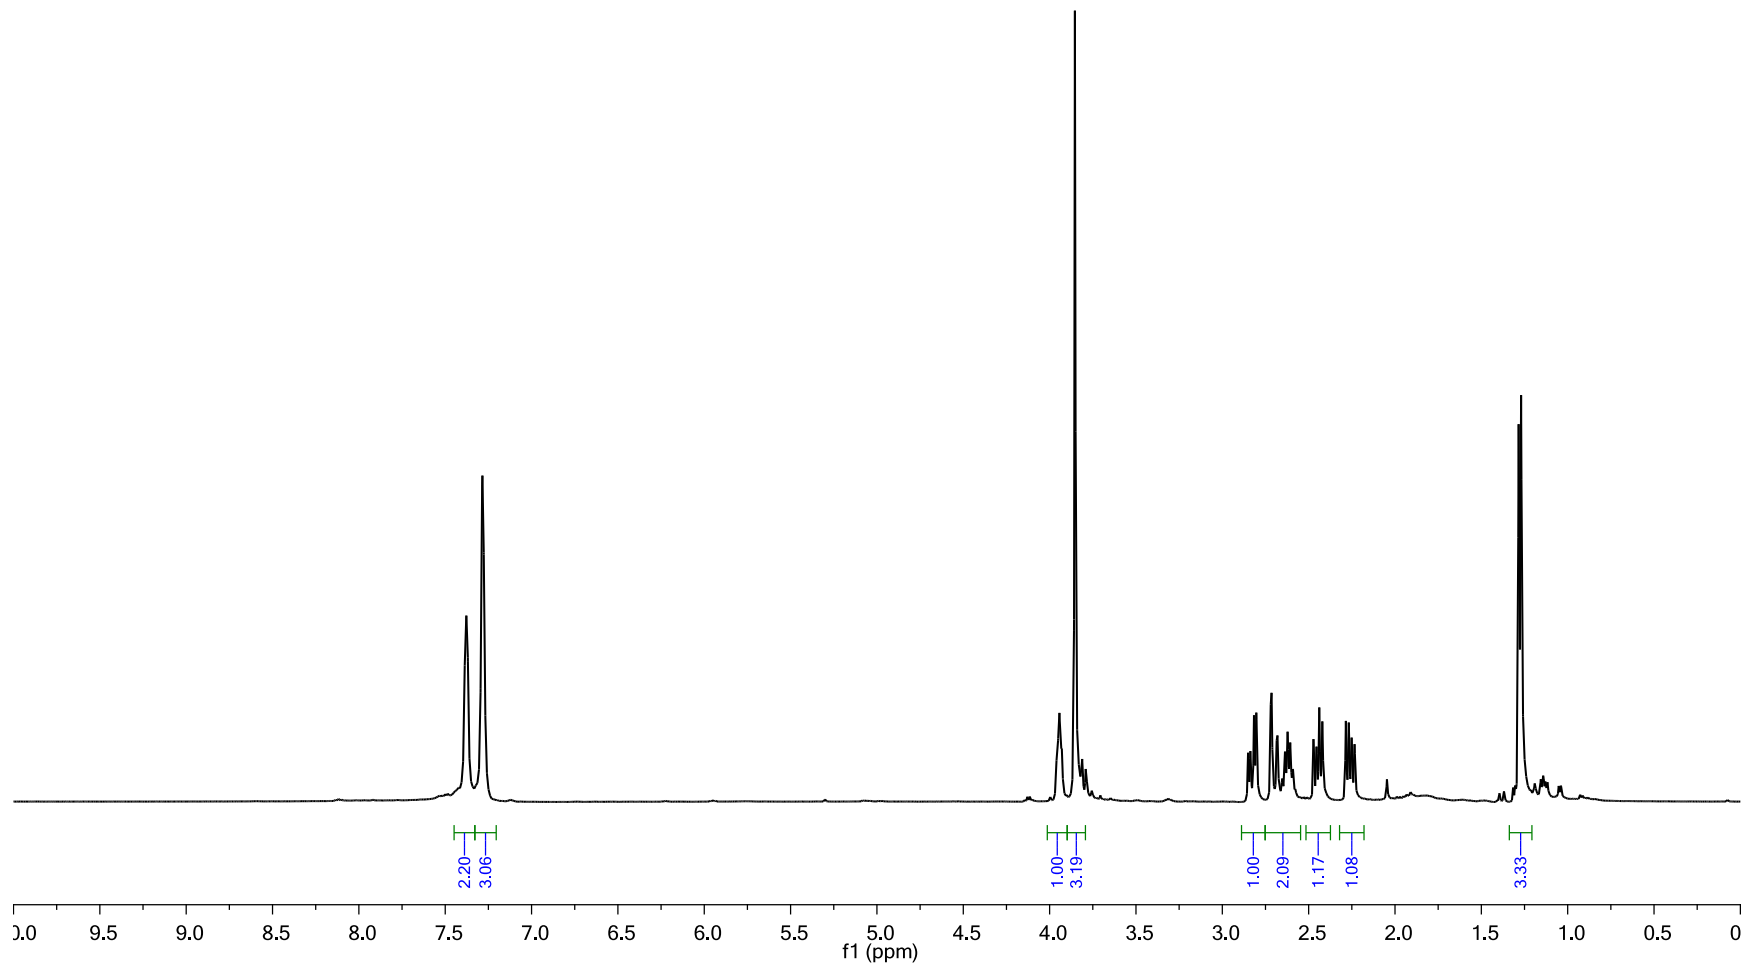

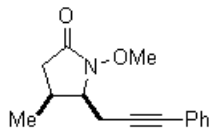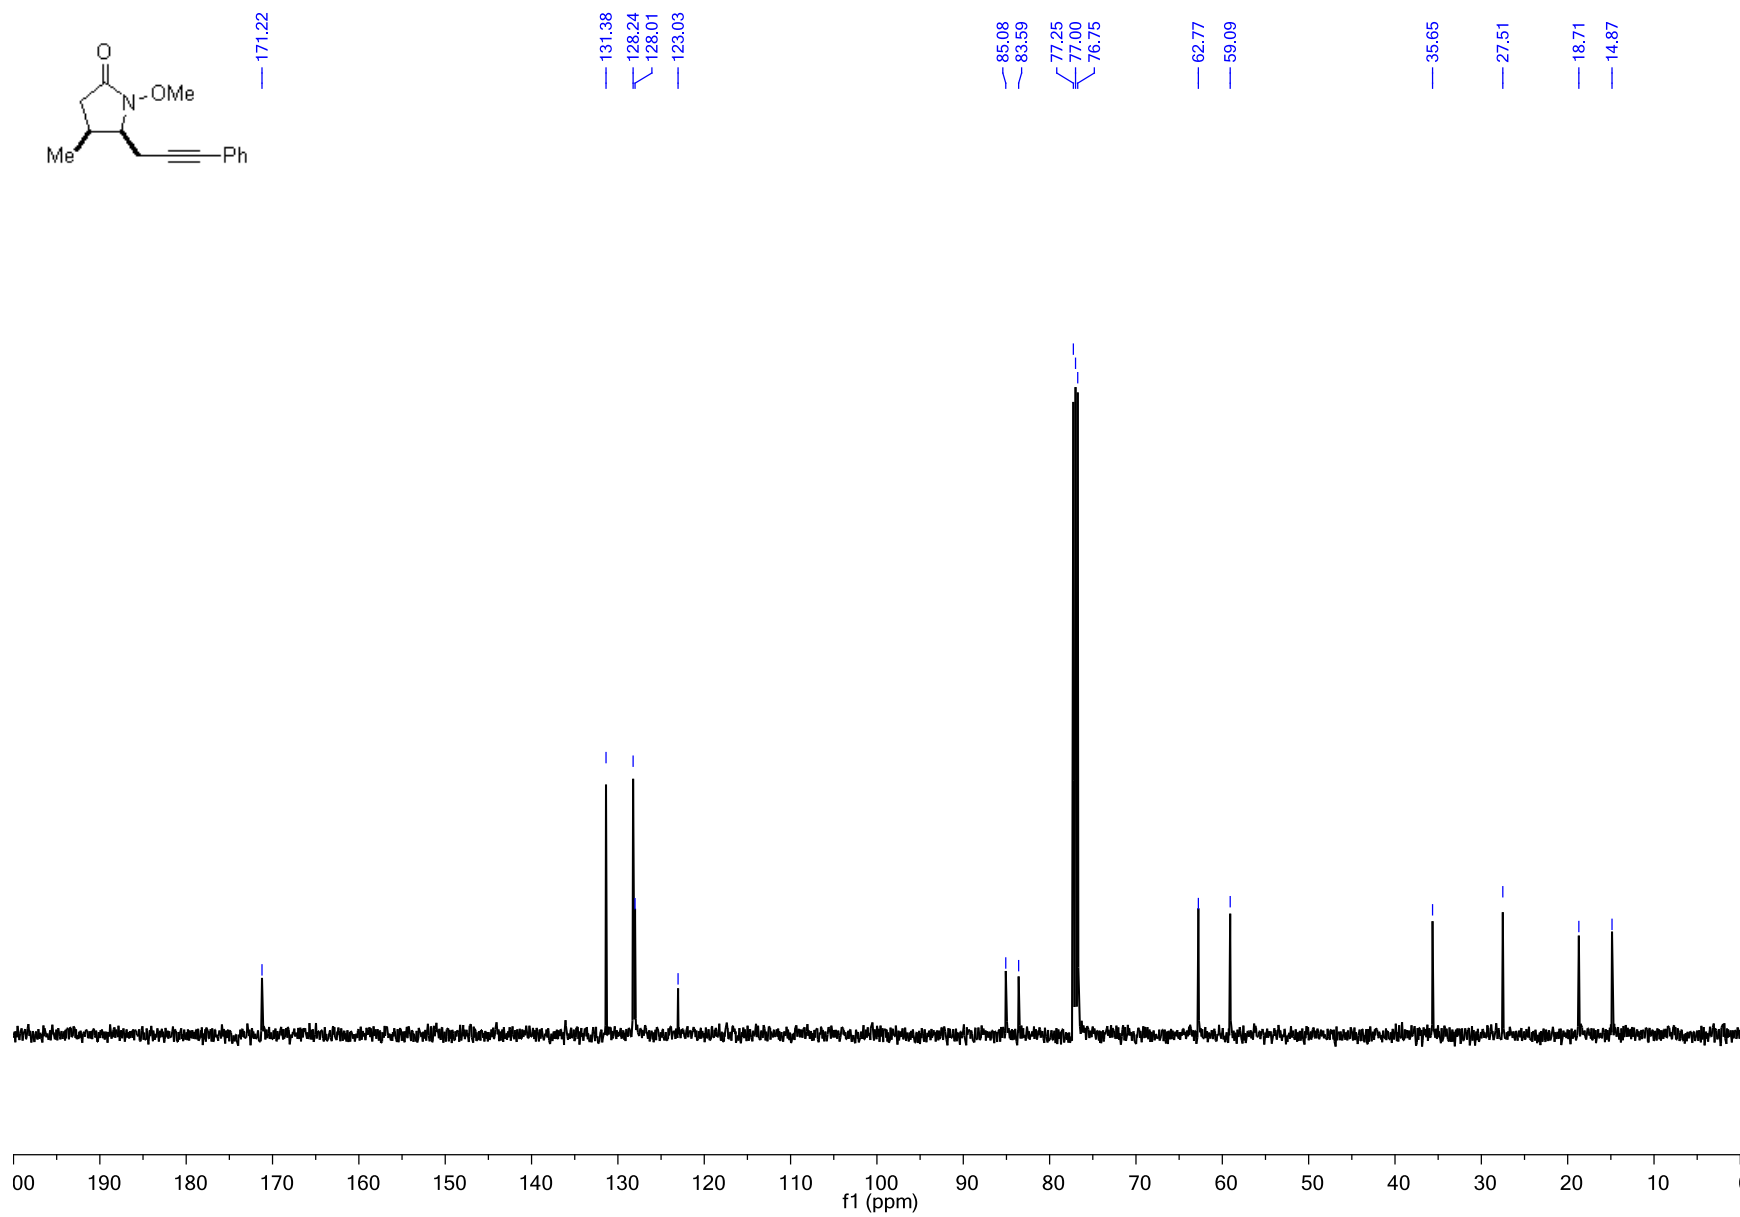

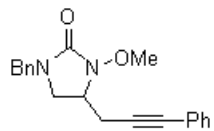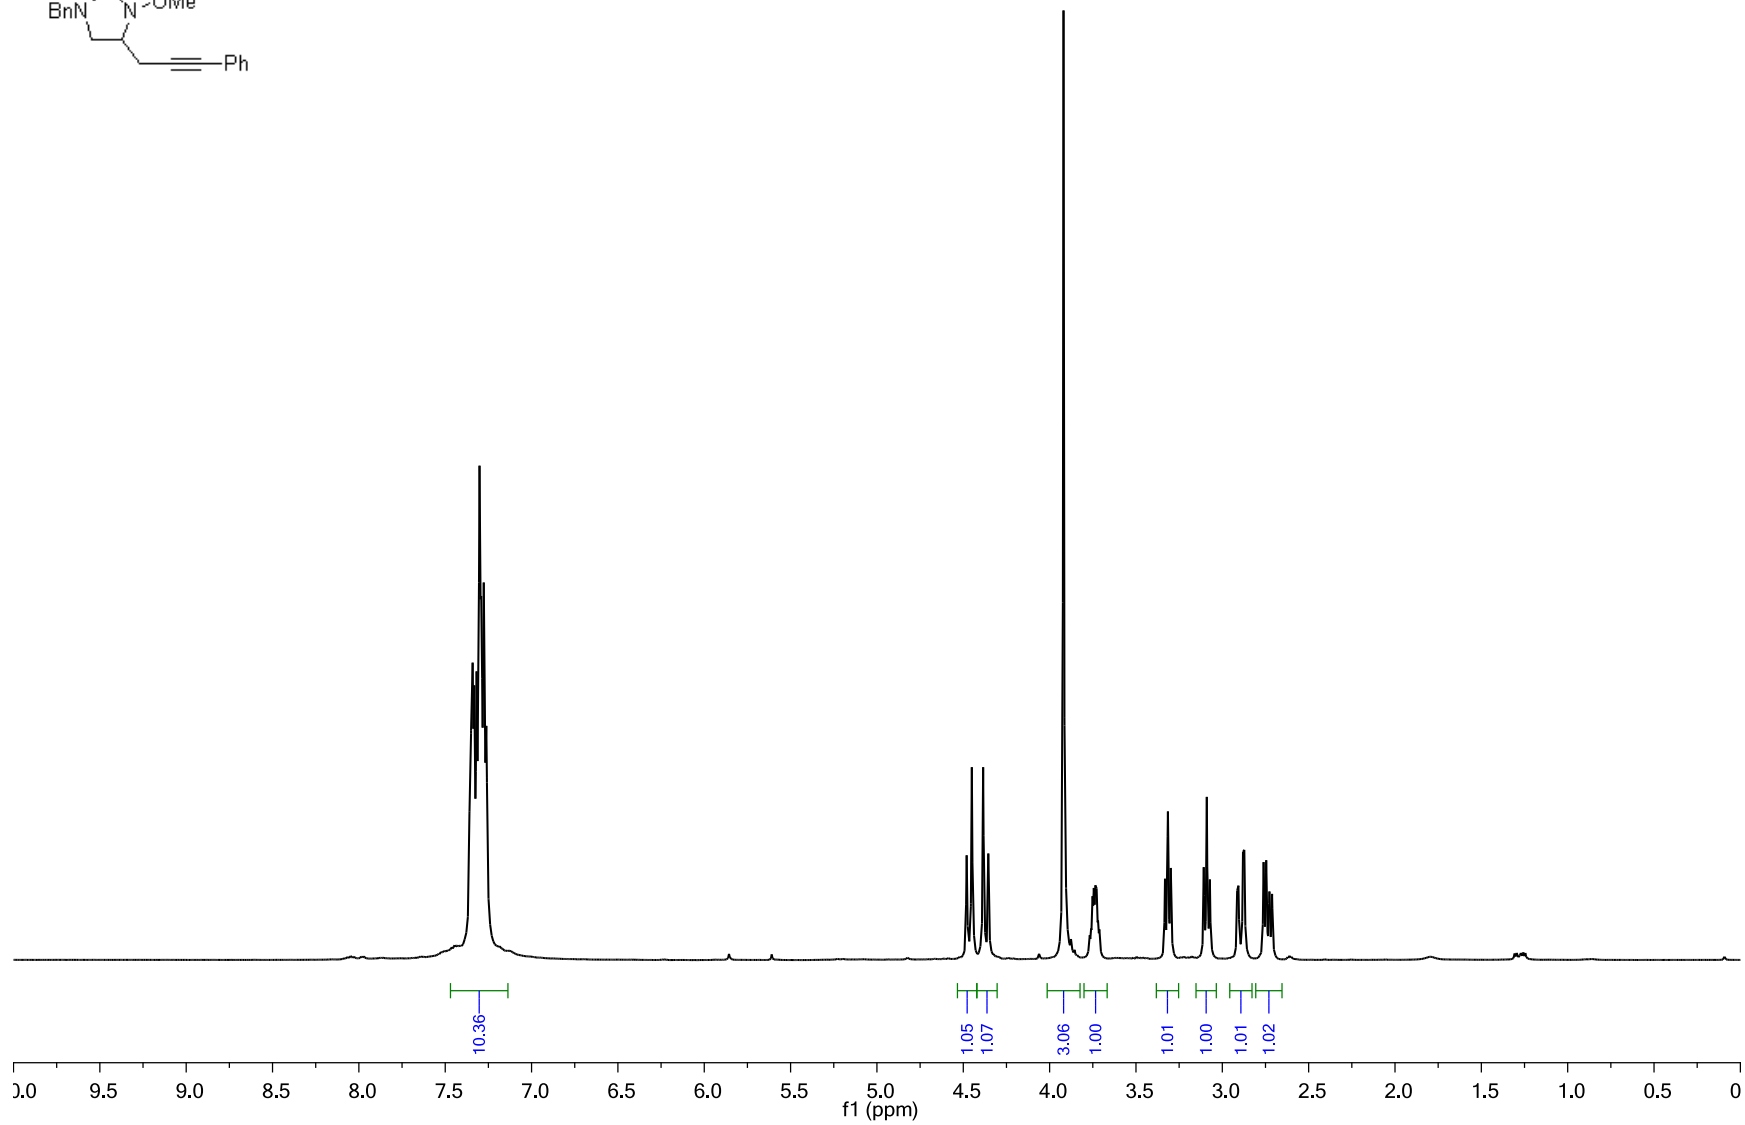

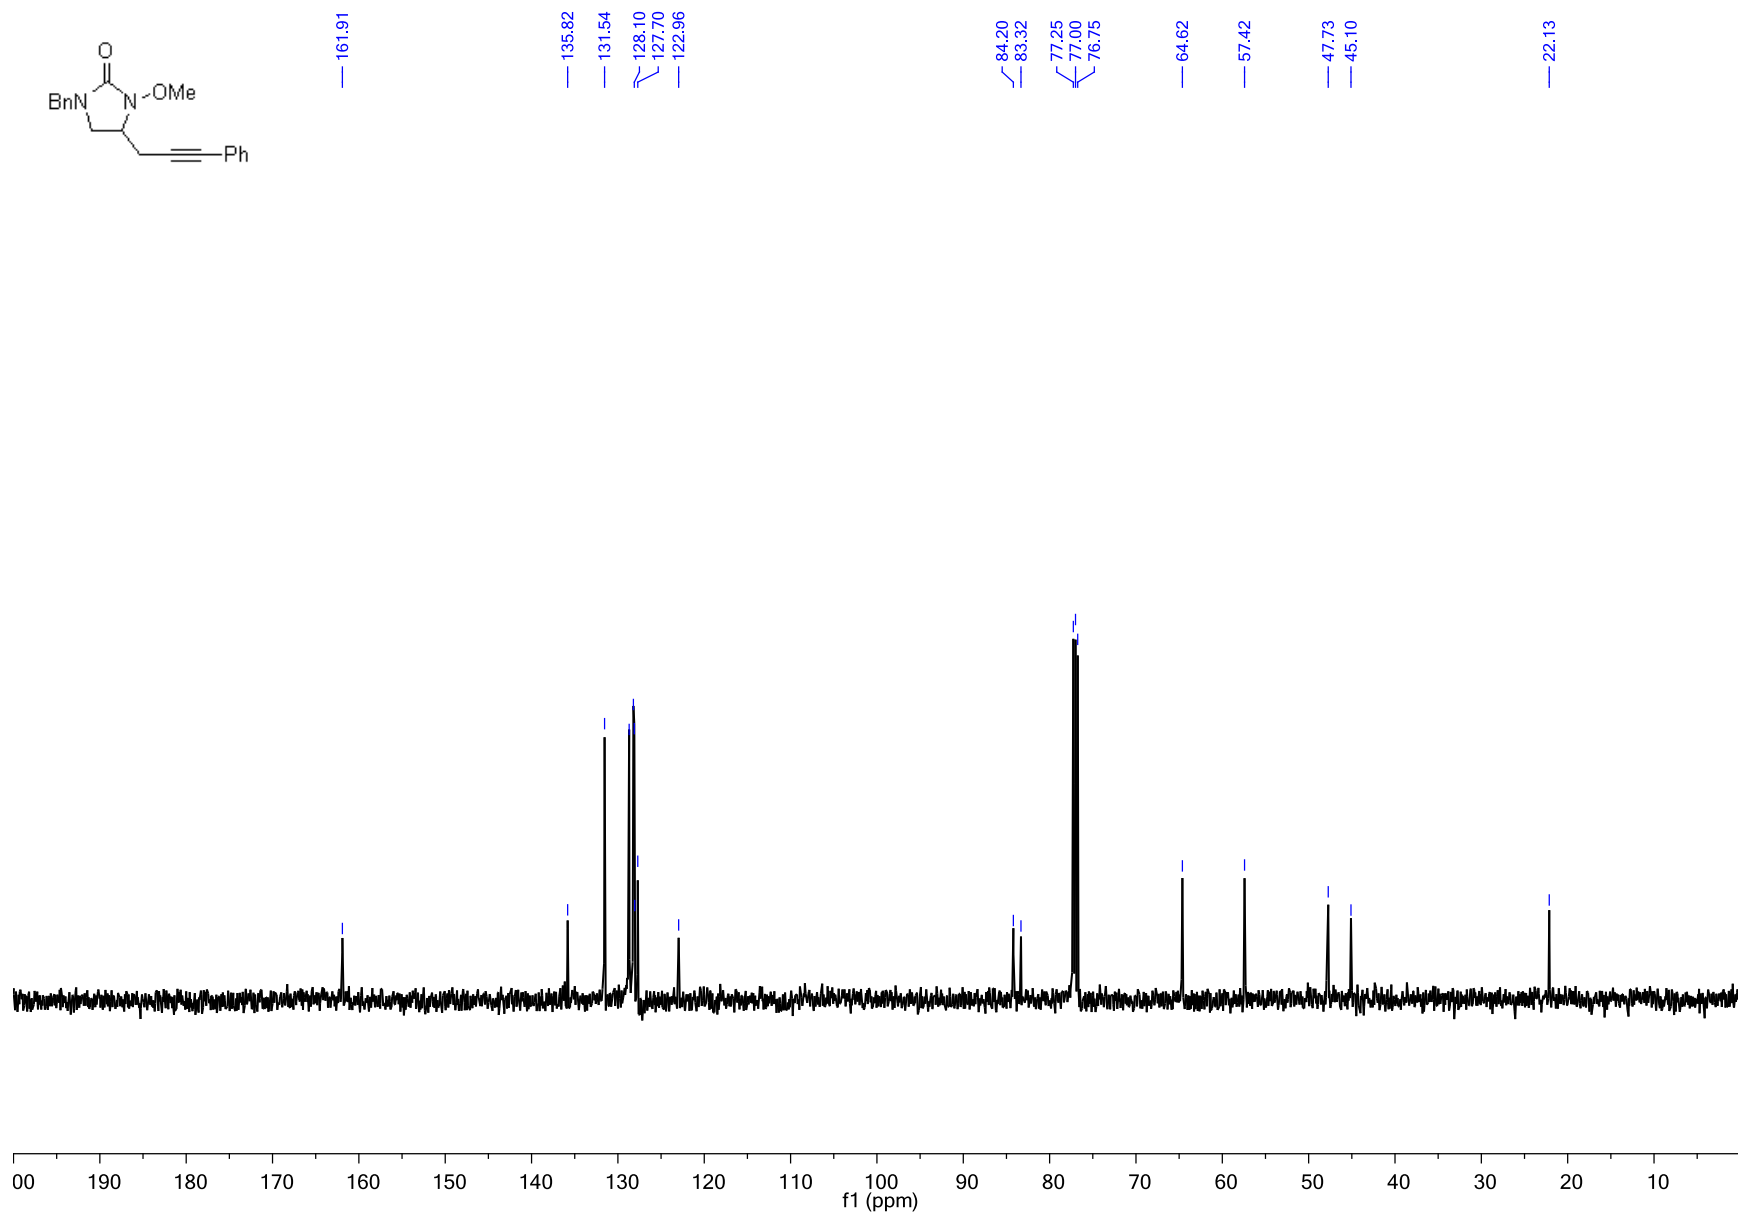



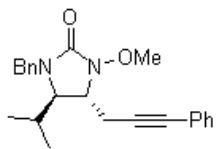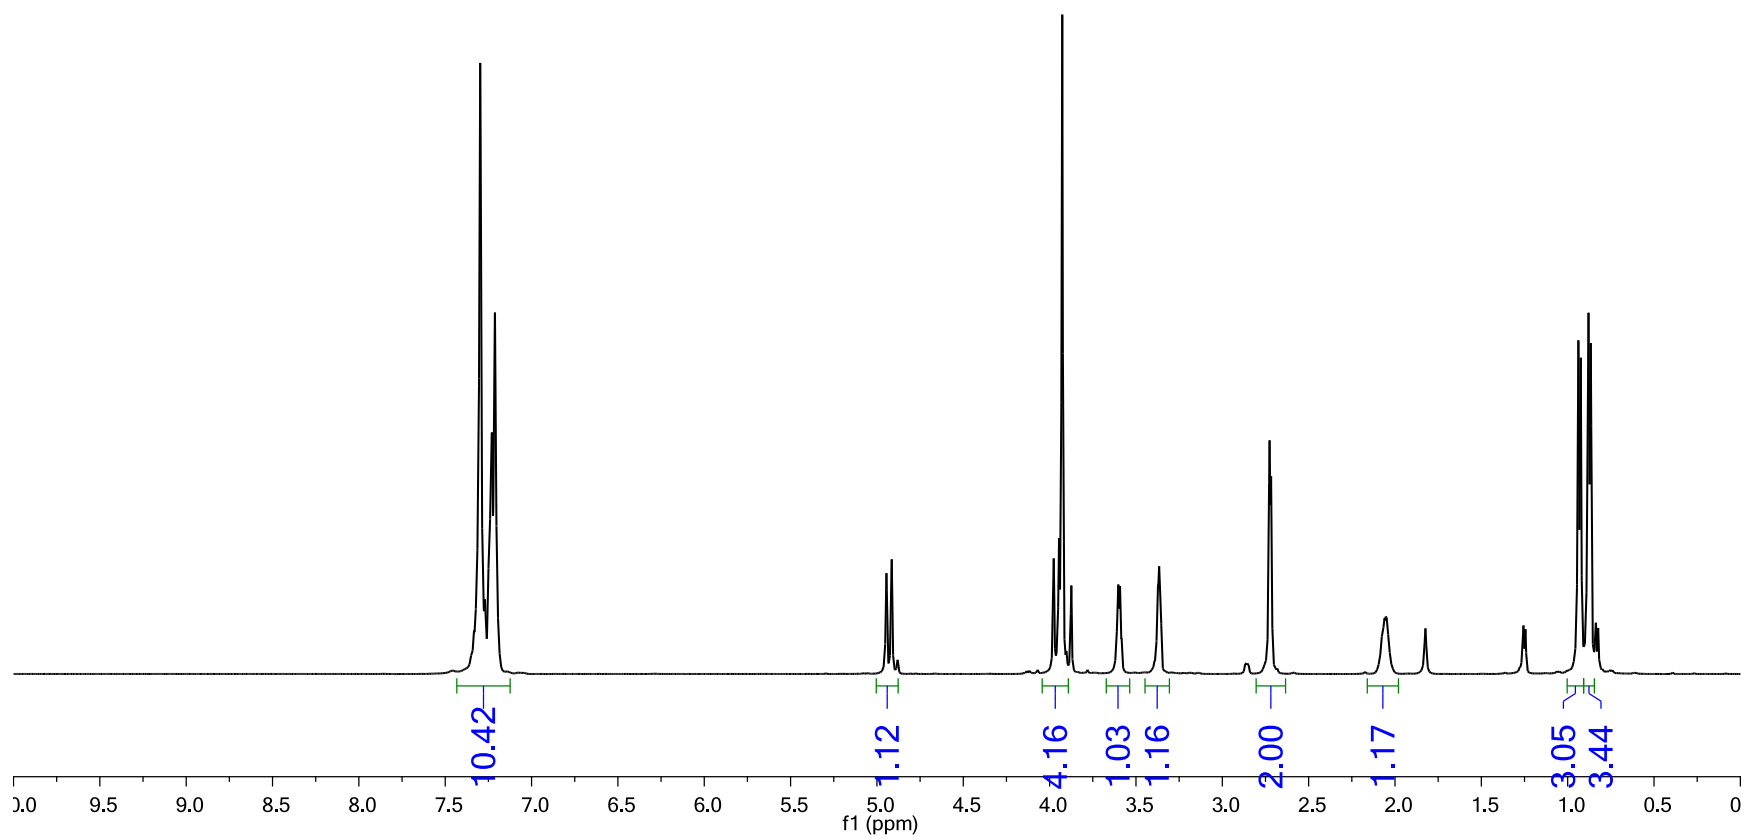

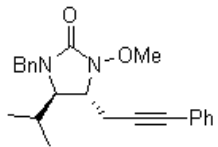

— 161.11

— 135.99

— 131.53

— 127.46

— 123.12

84.82  
83.57

77.26  
77.00  
76.75

— 64.44

— 59.69

— 56.29

— 45.13

— 27.26

— 22.72

— 18.13

— 15.82

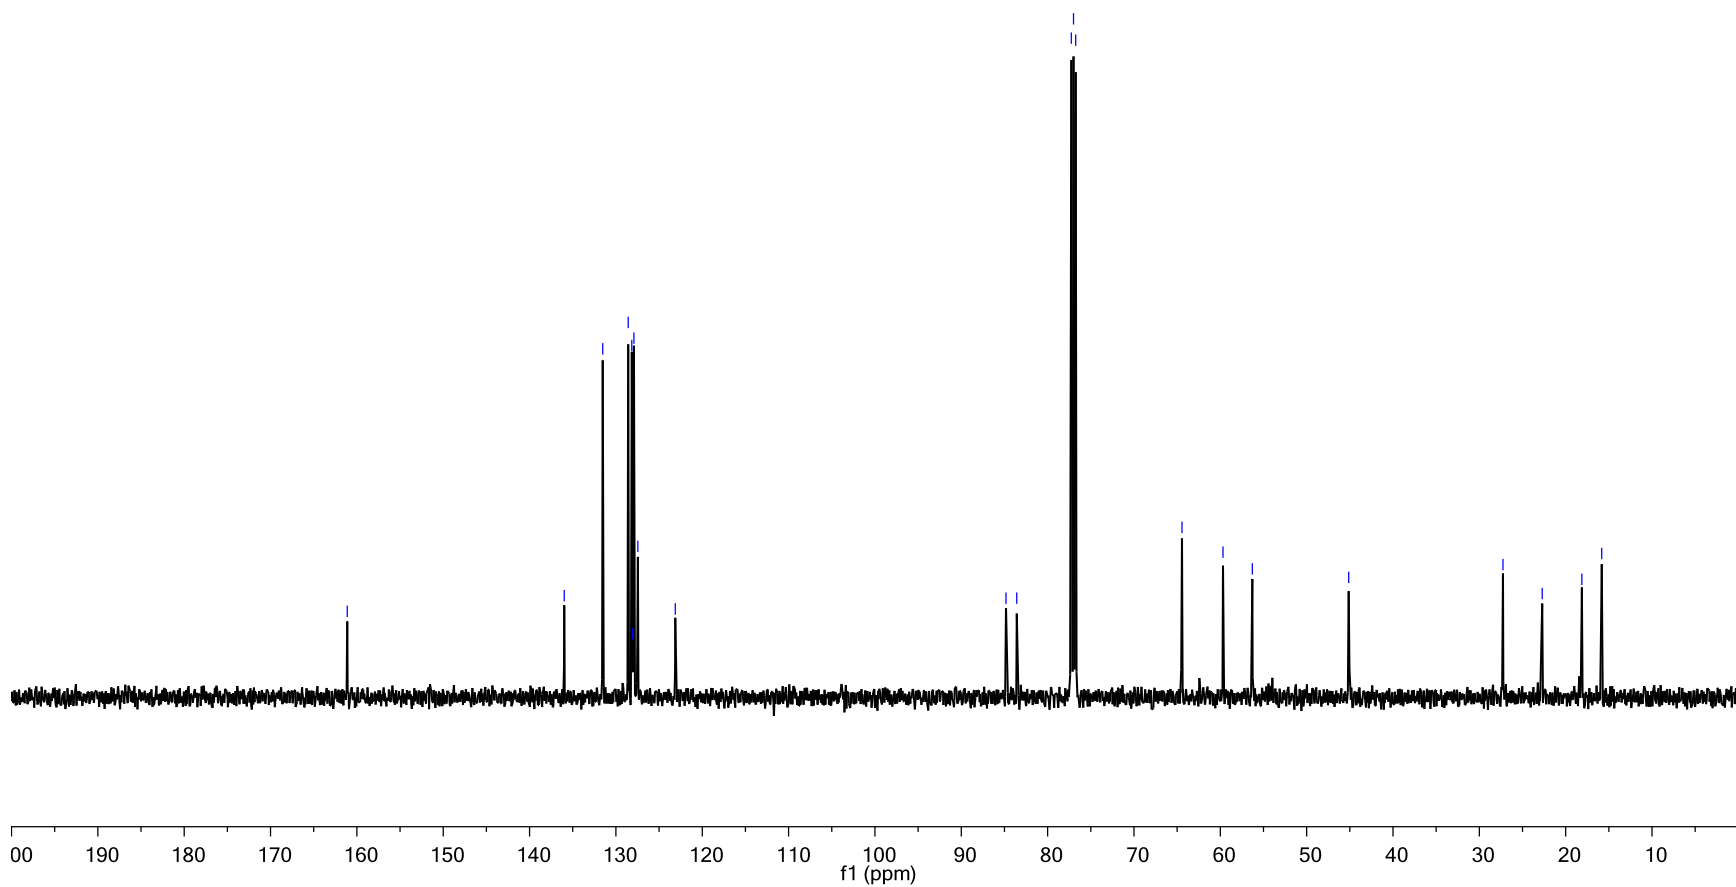

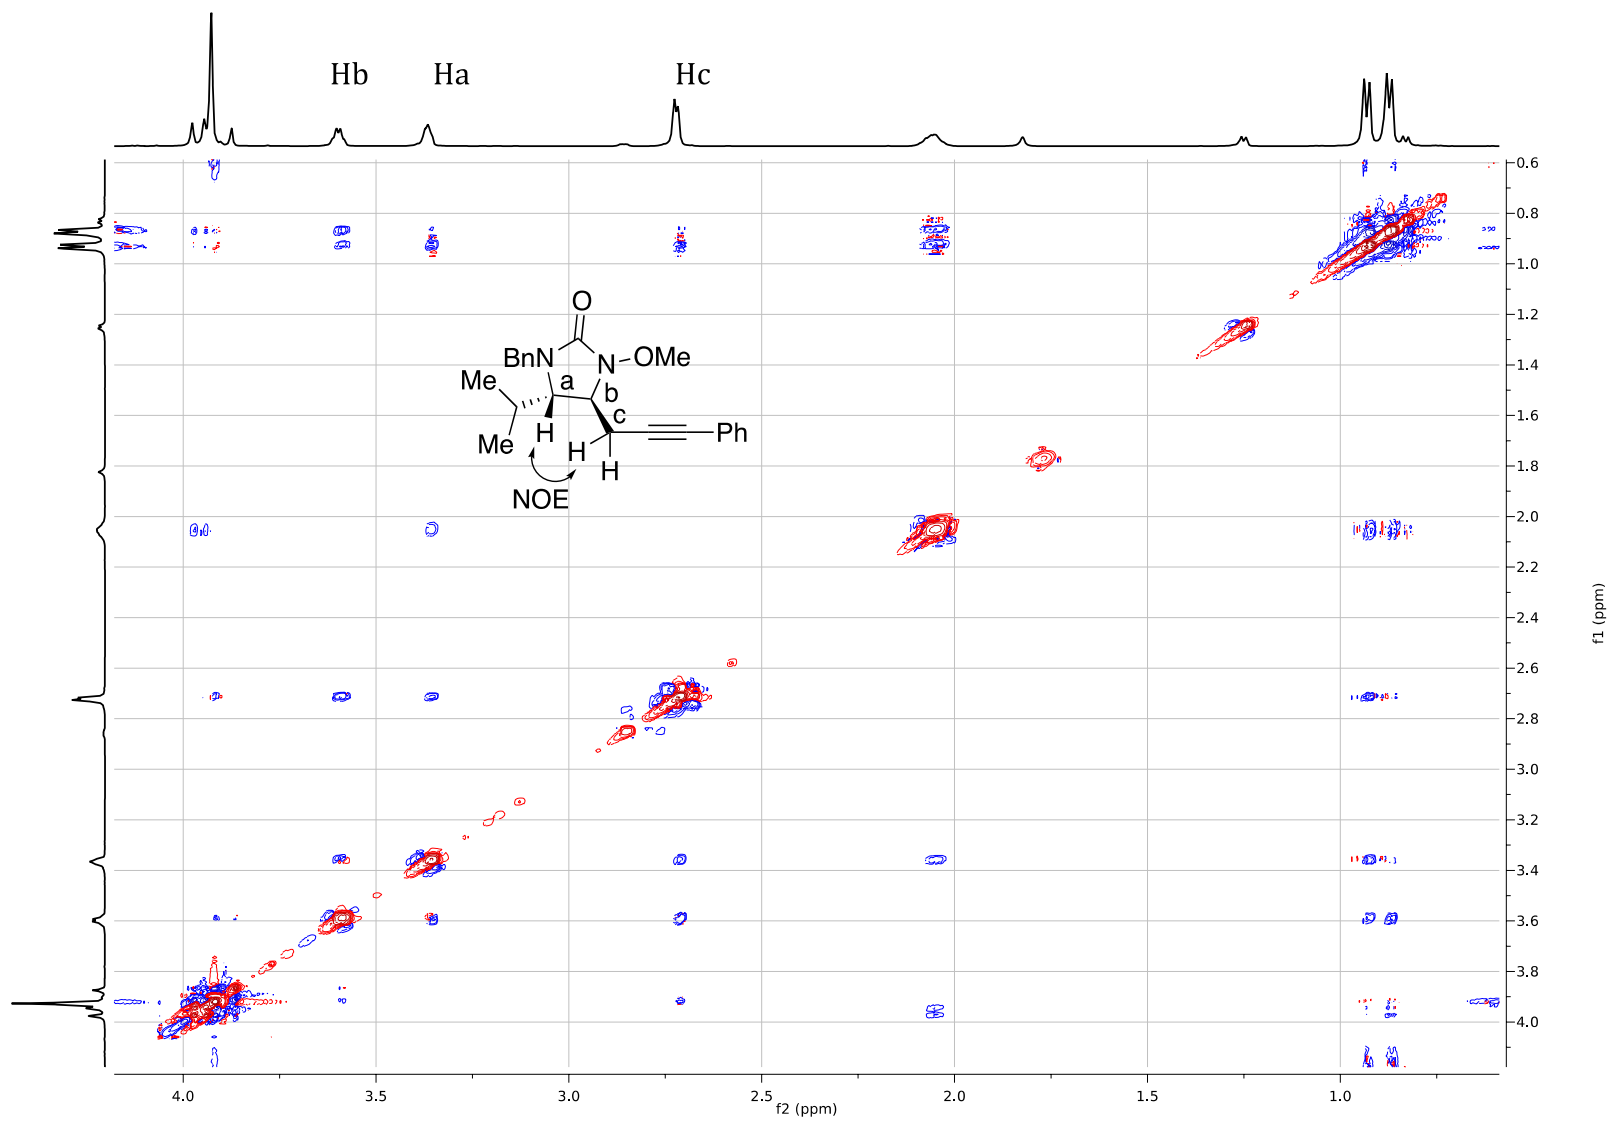

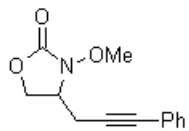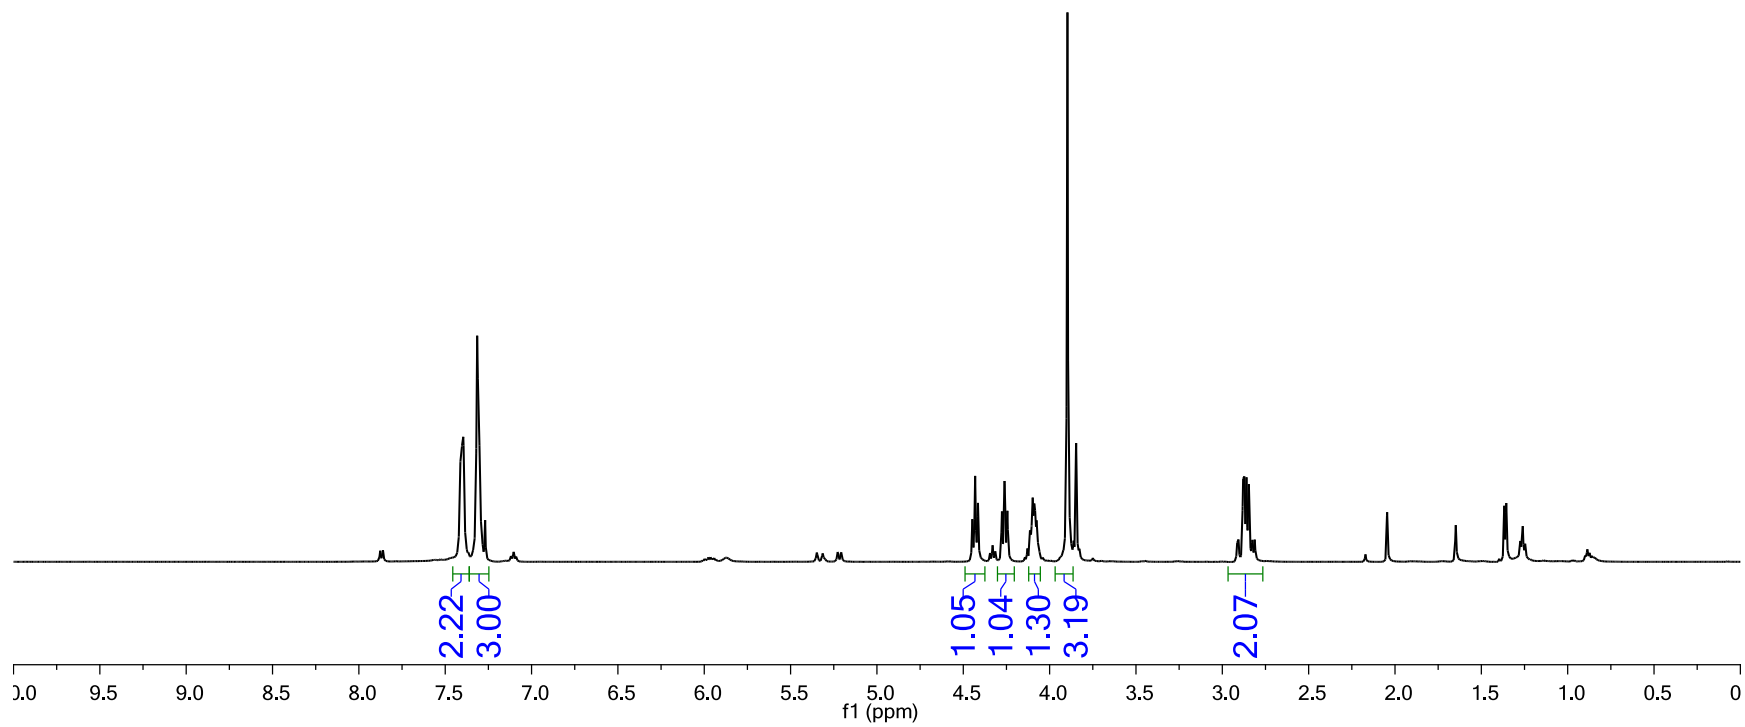

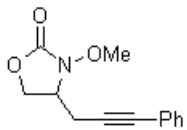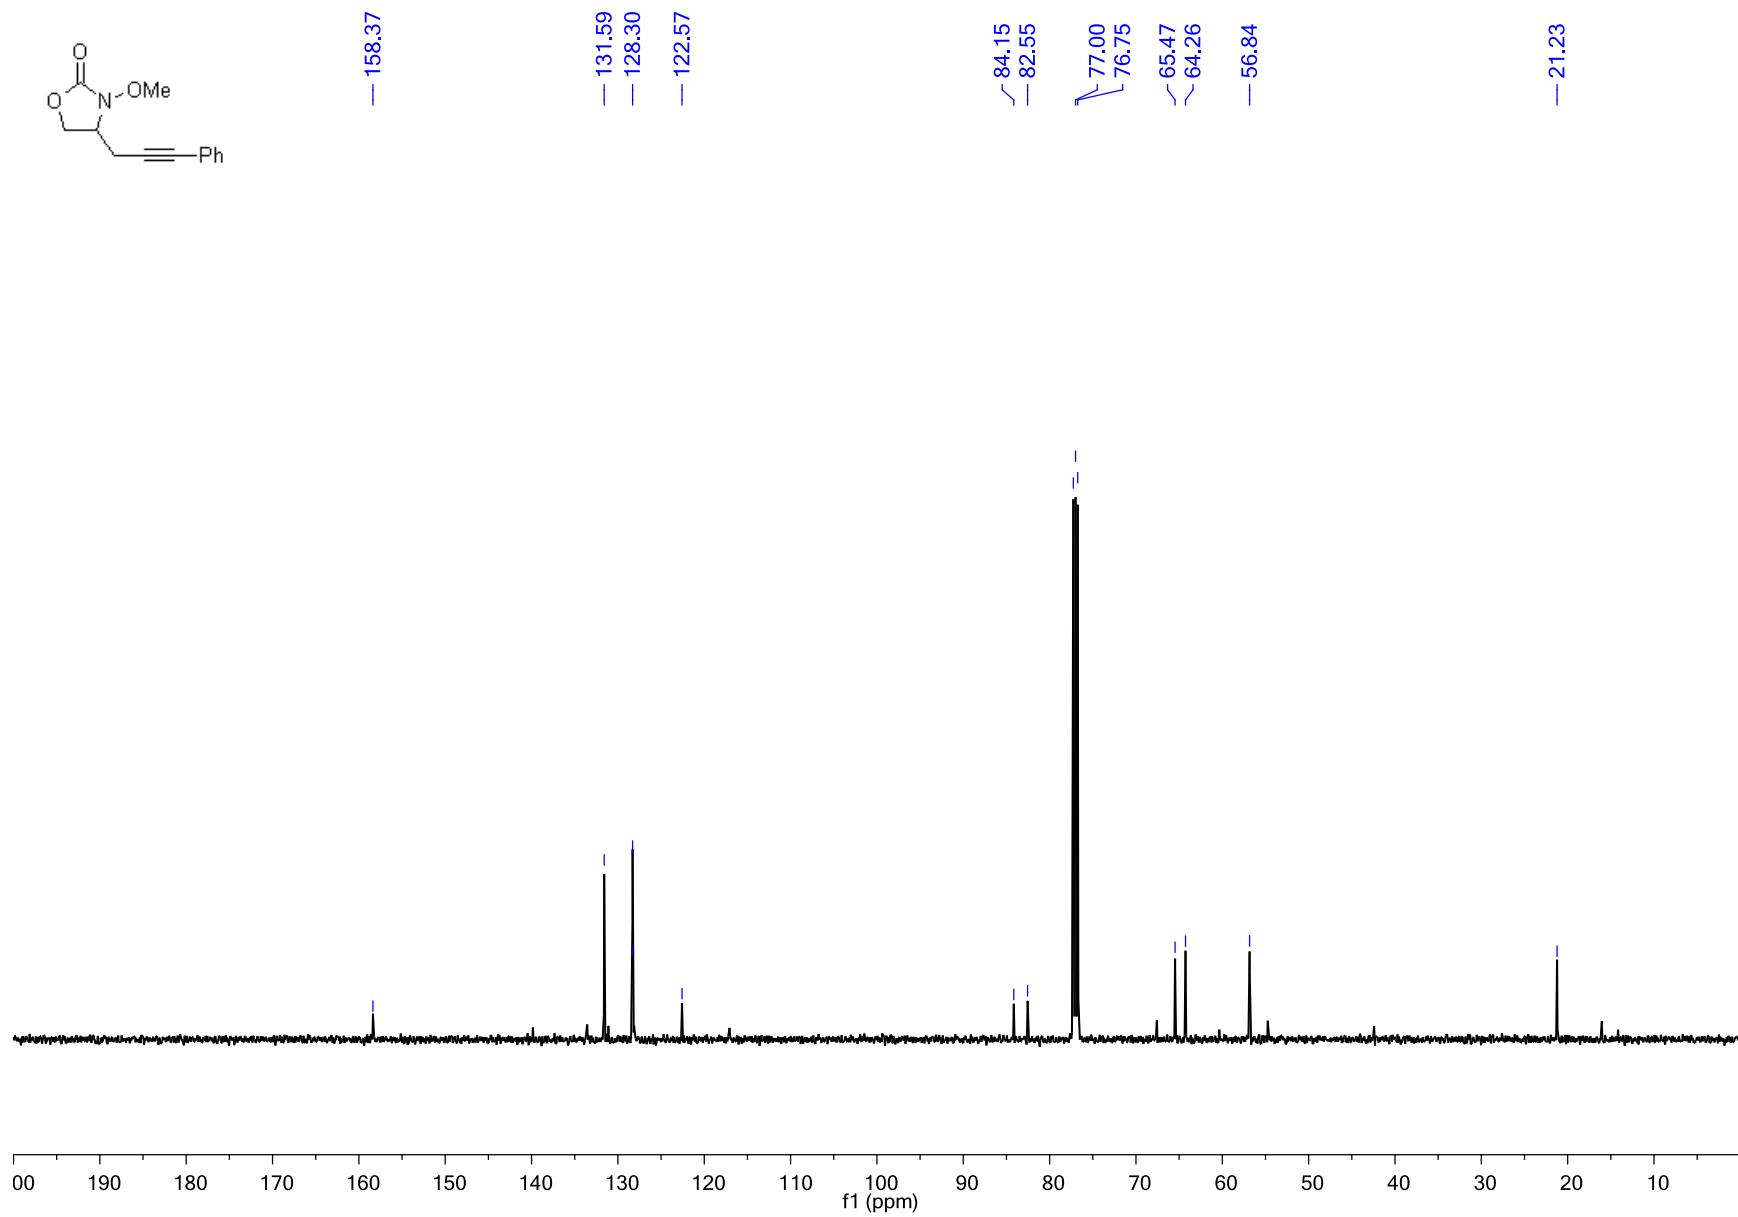

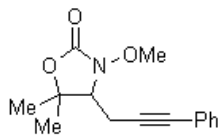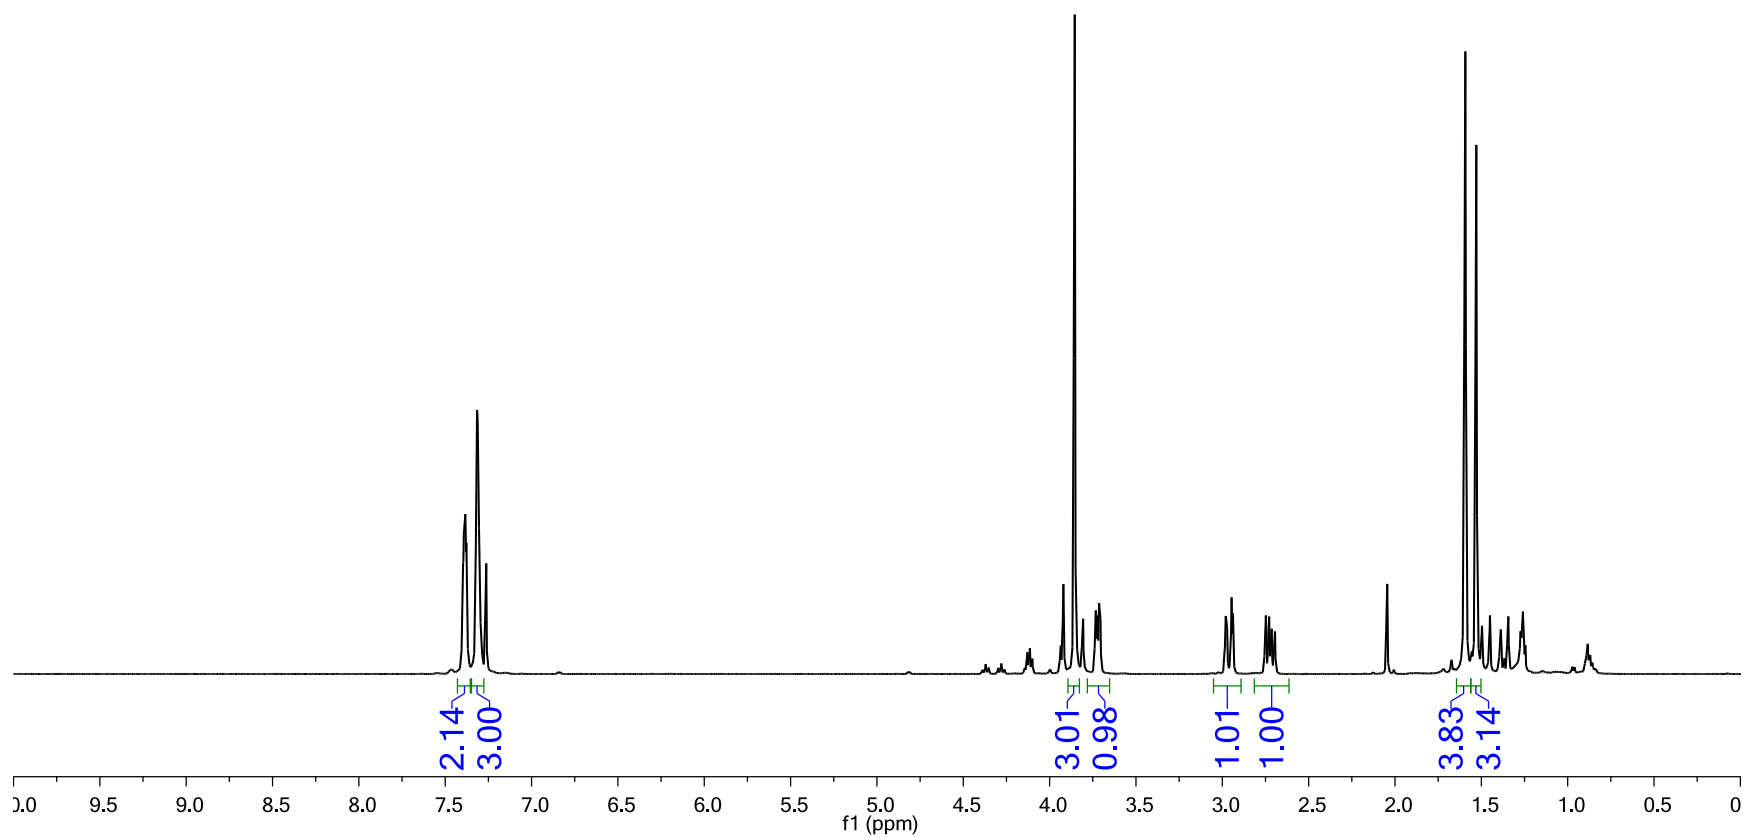

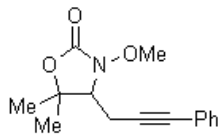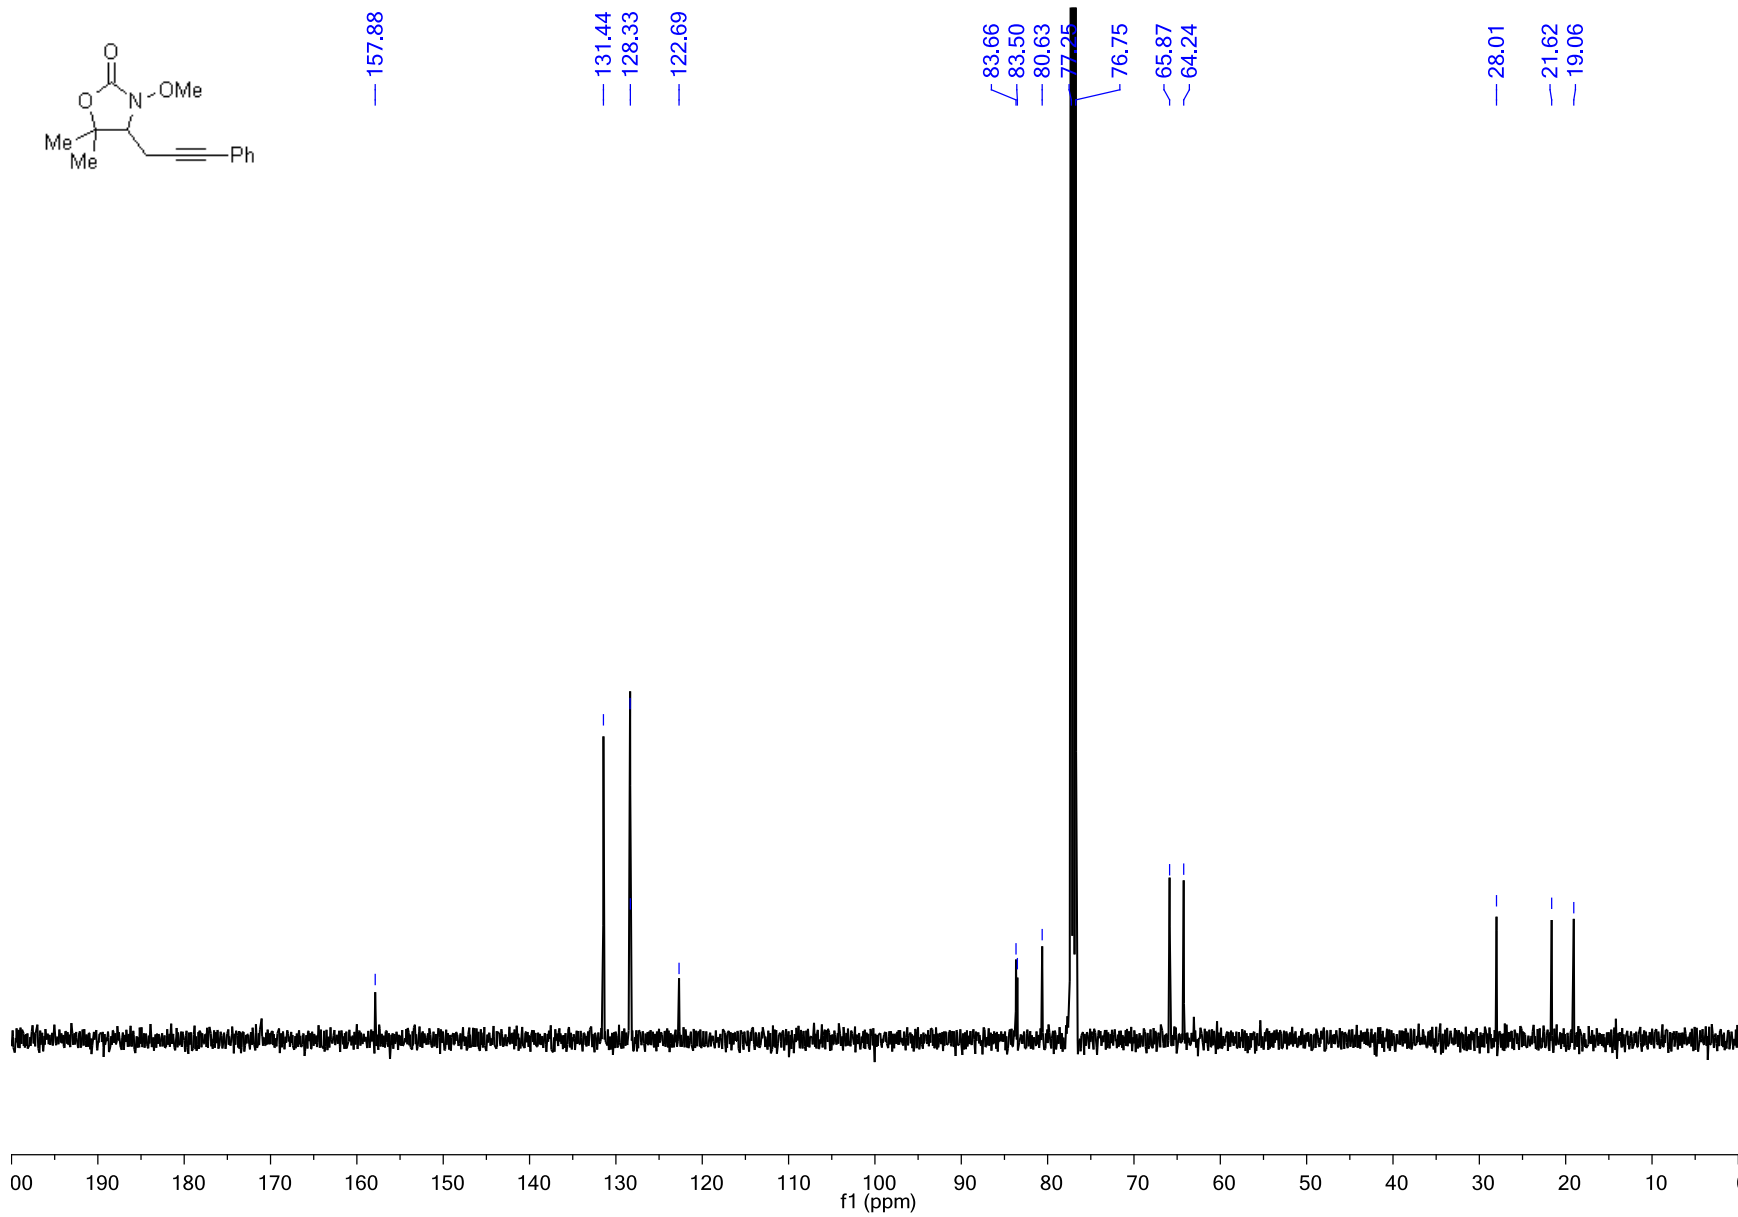

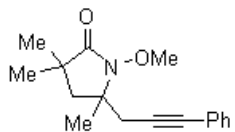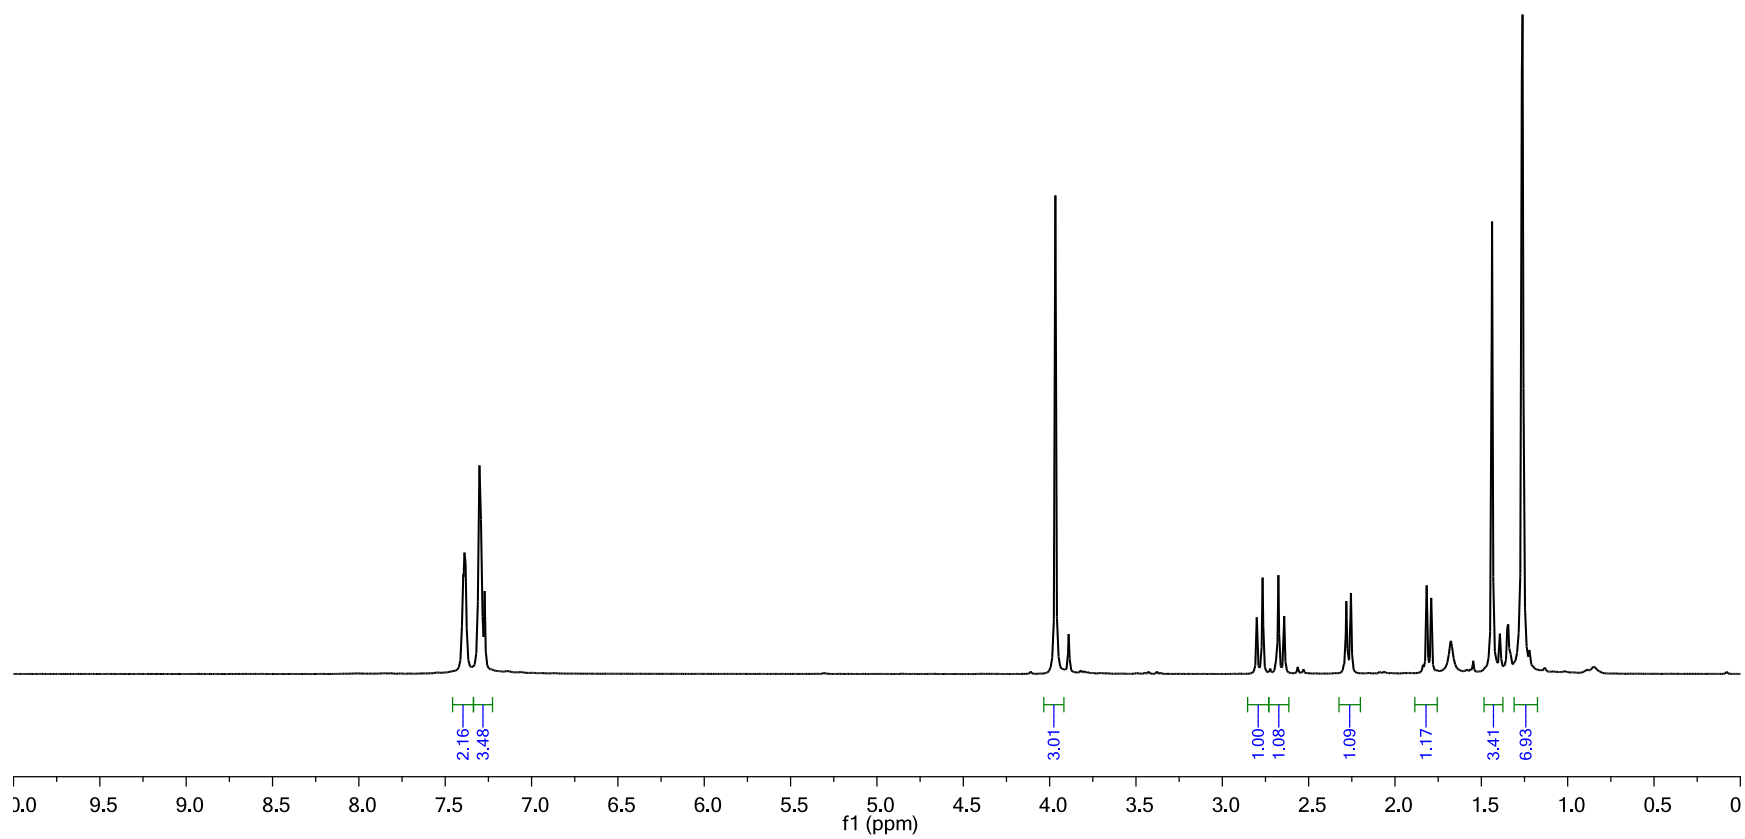



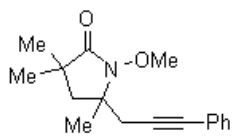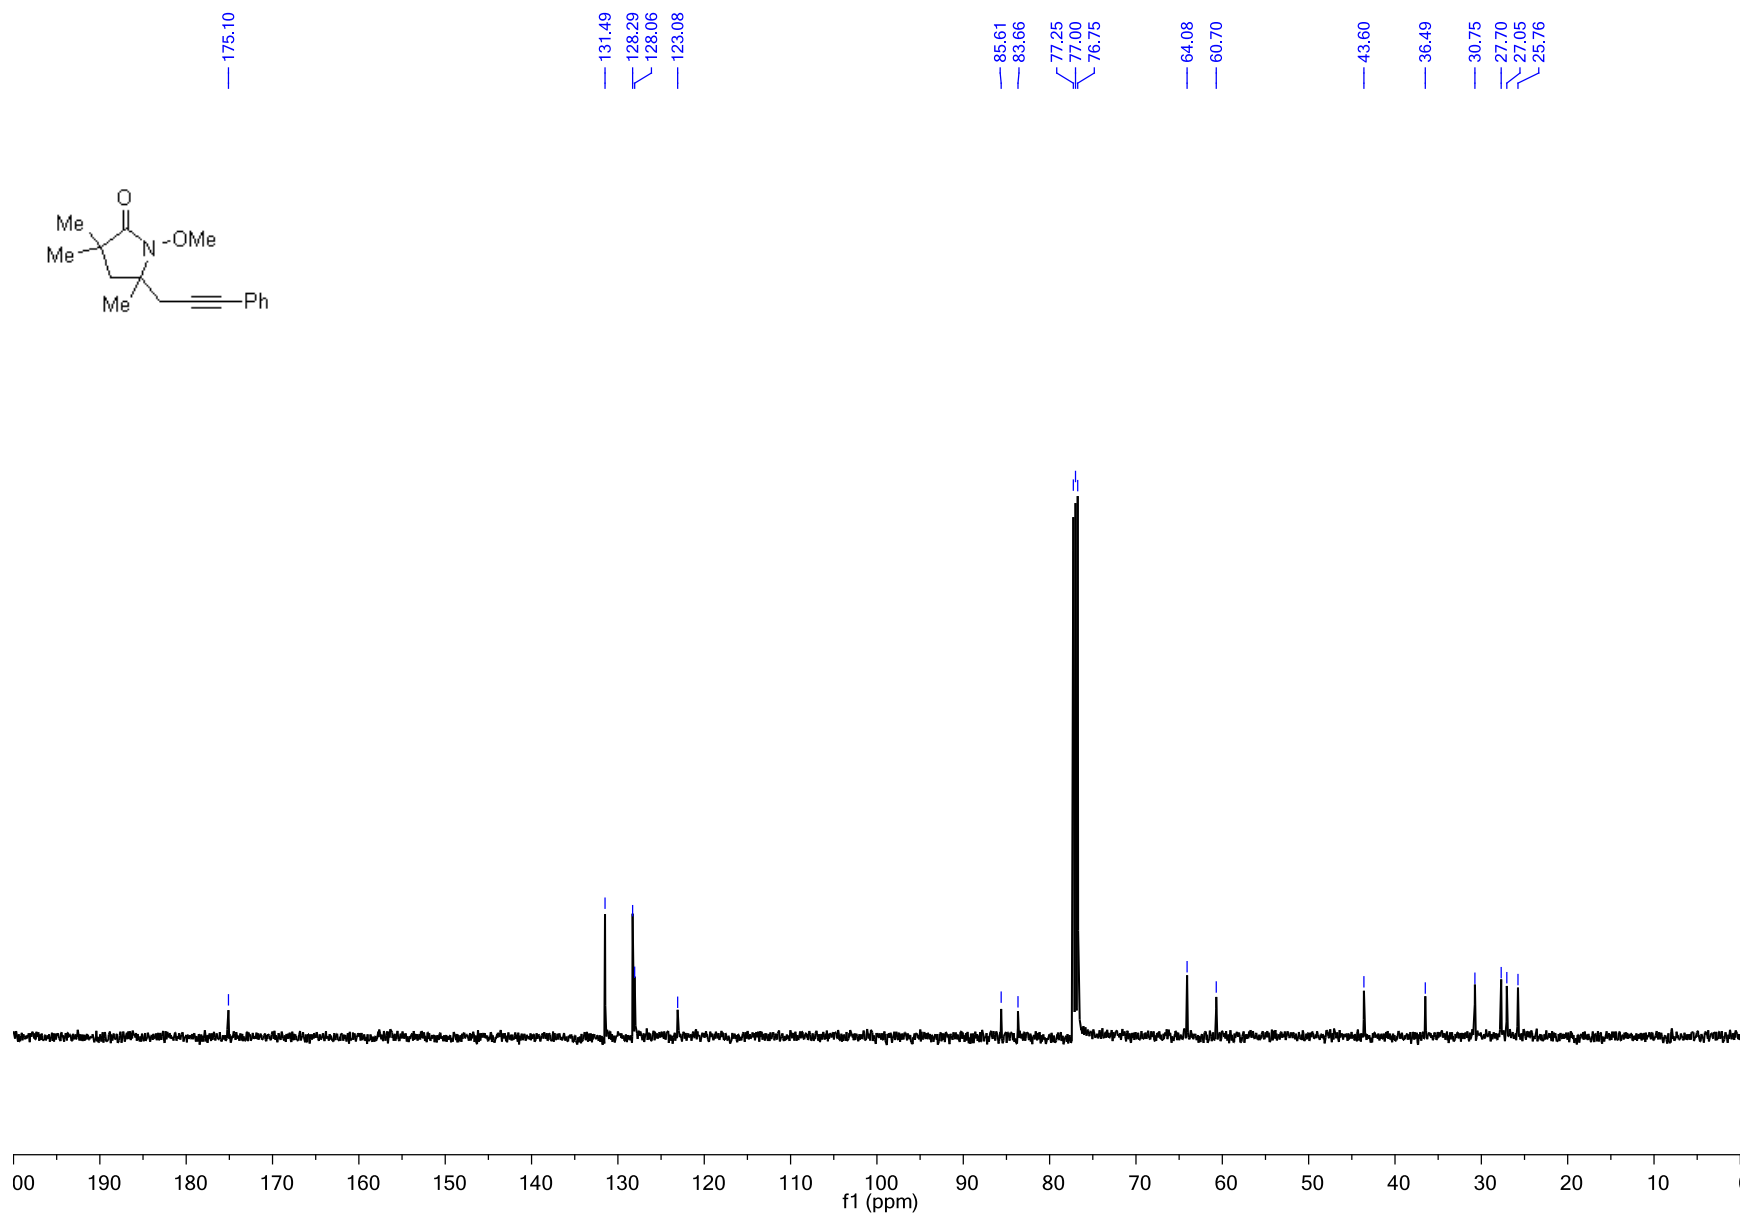

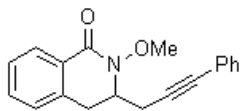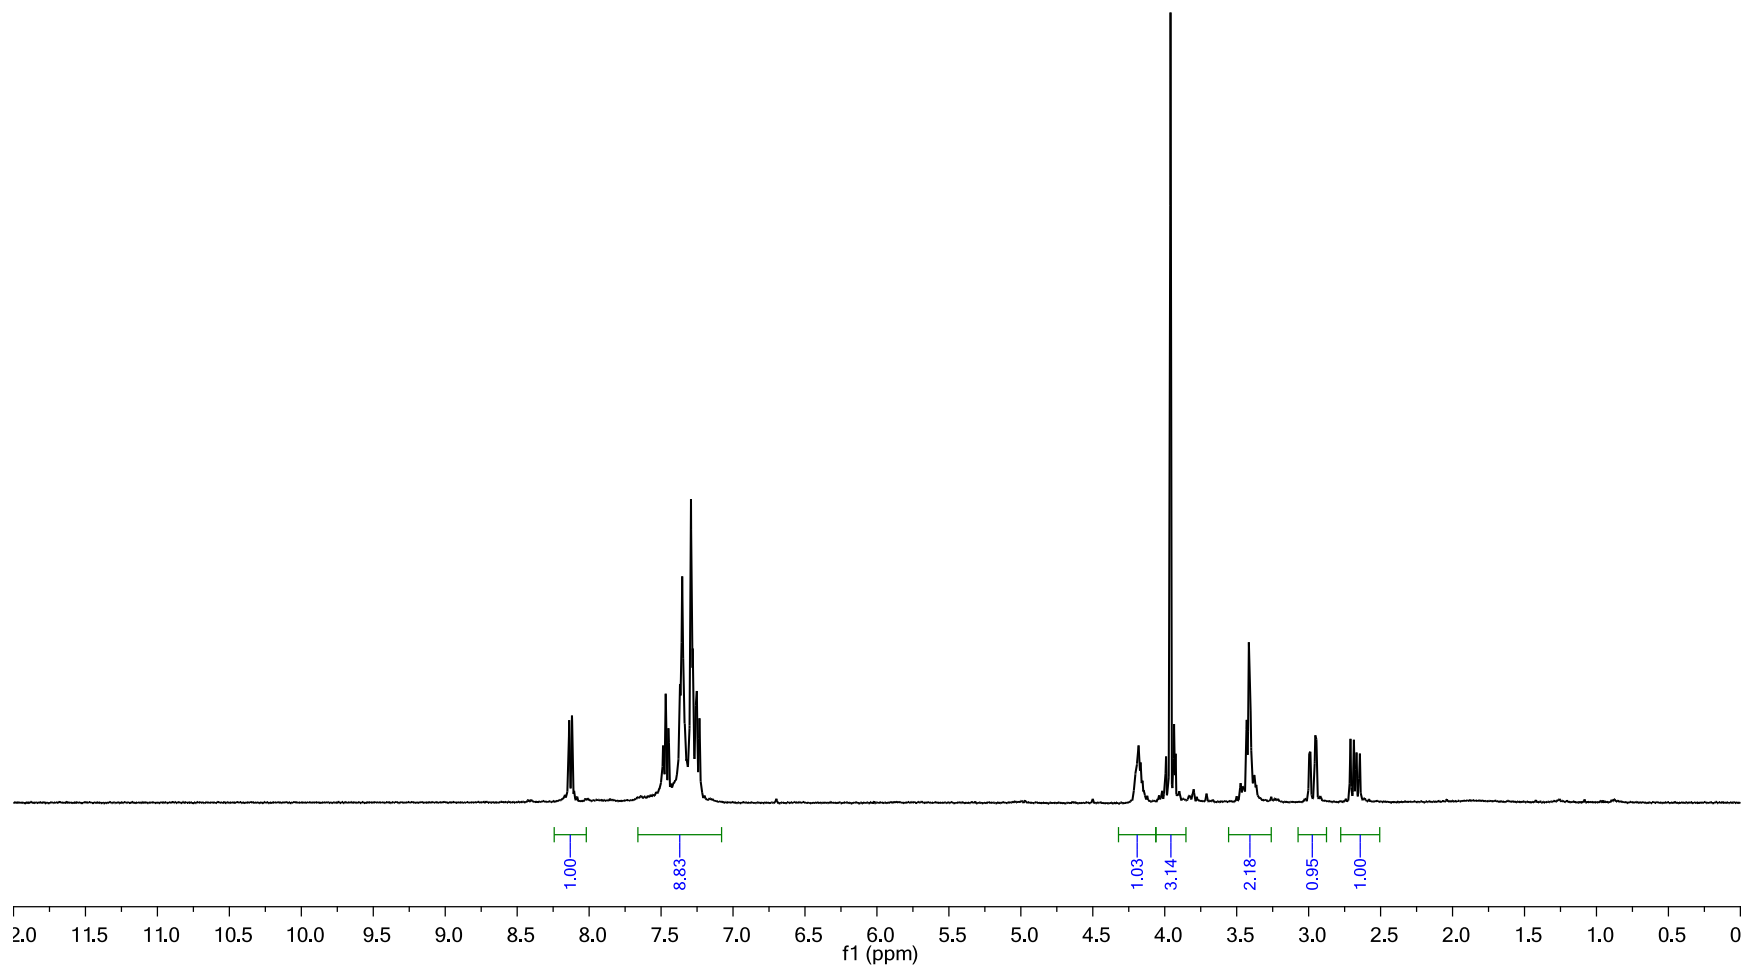

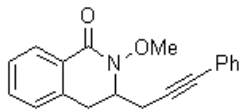

163.47

135.34

131.53

127.16

123.04

85.34

83.48

77.32

77.00

76.68

63.10

57.98

32.72

21.86

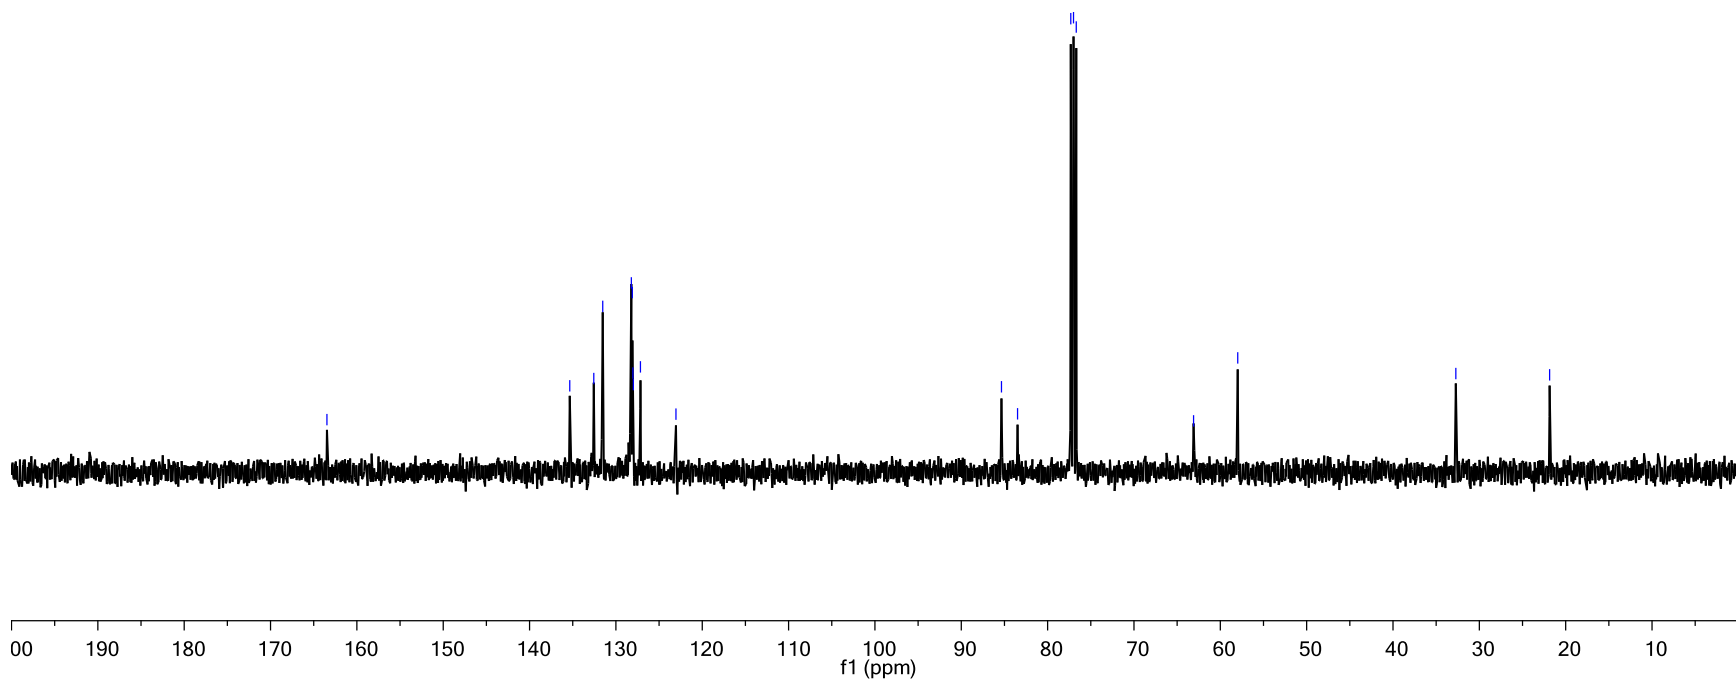

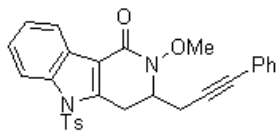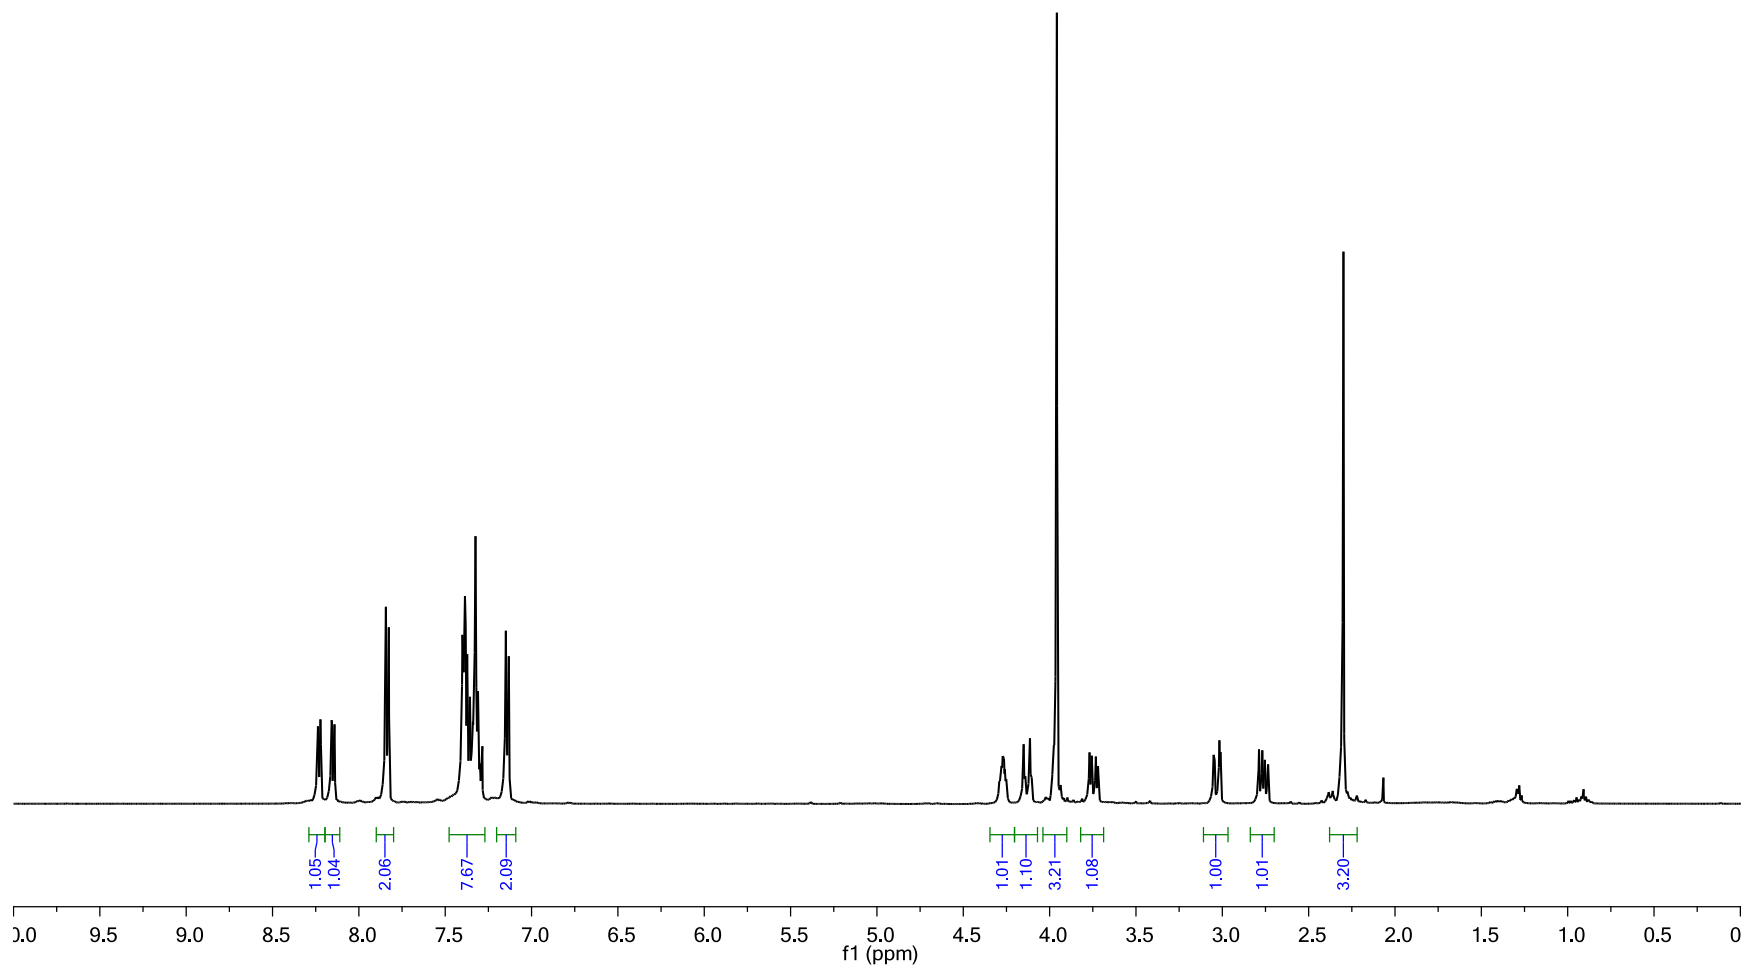

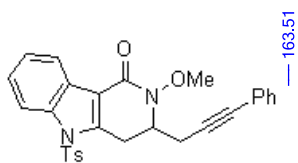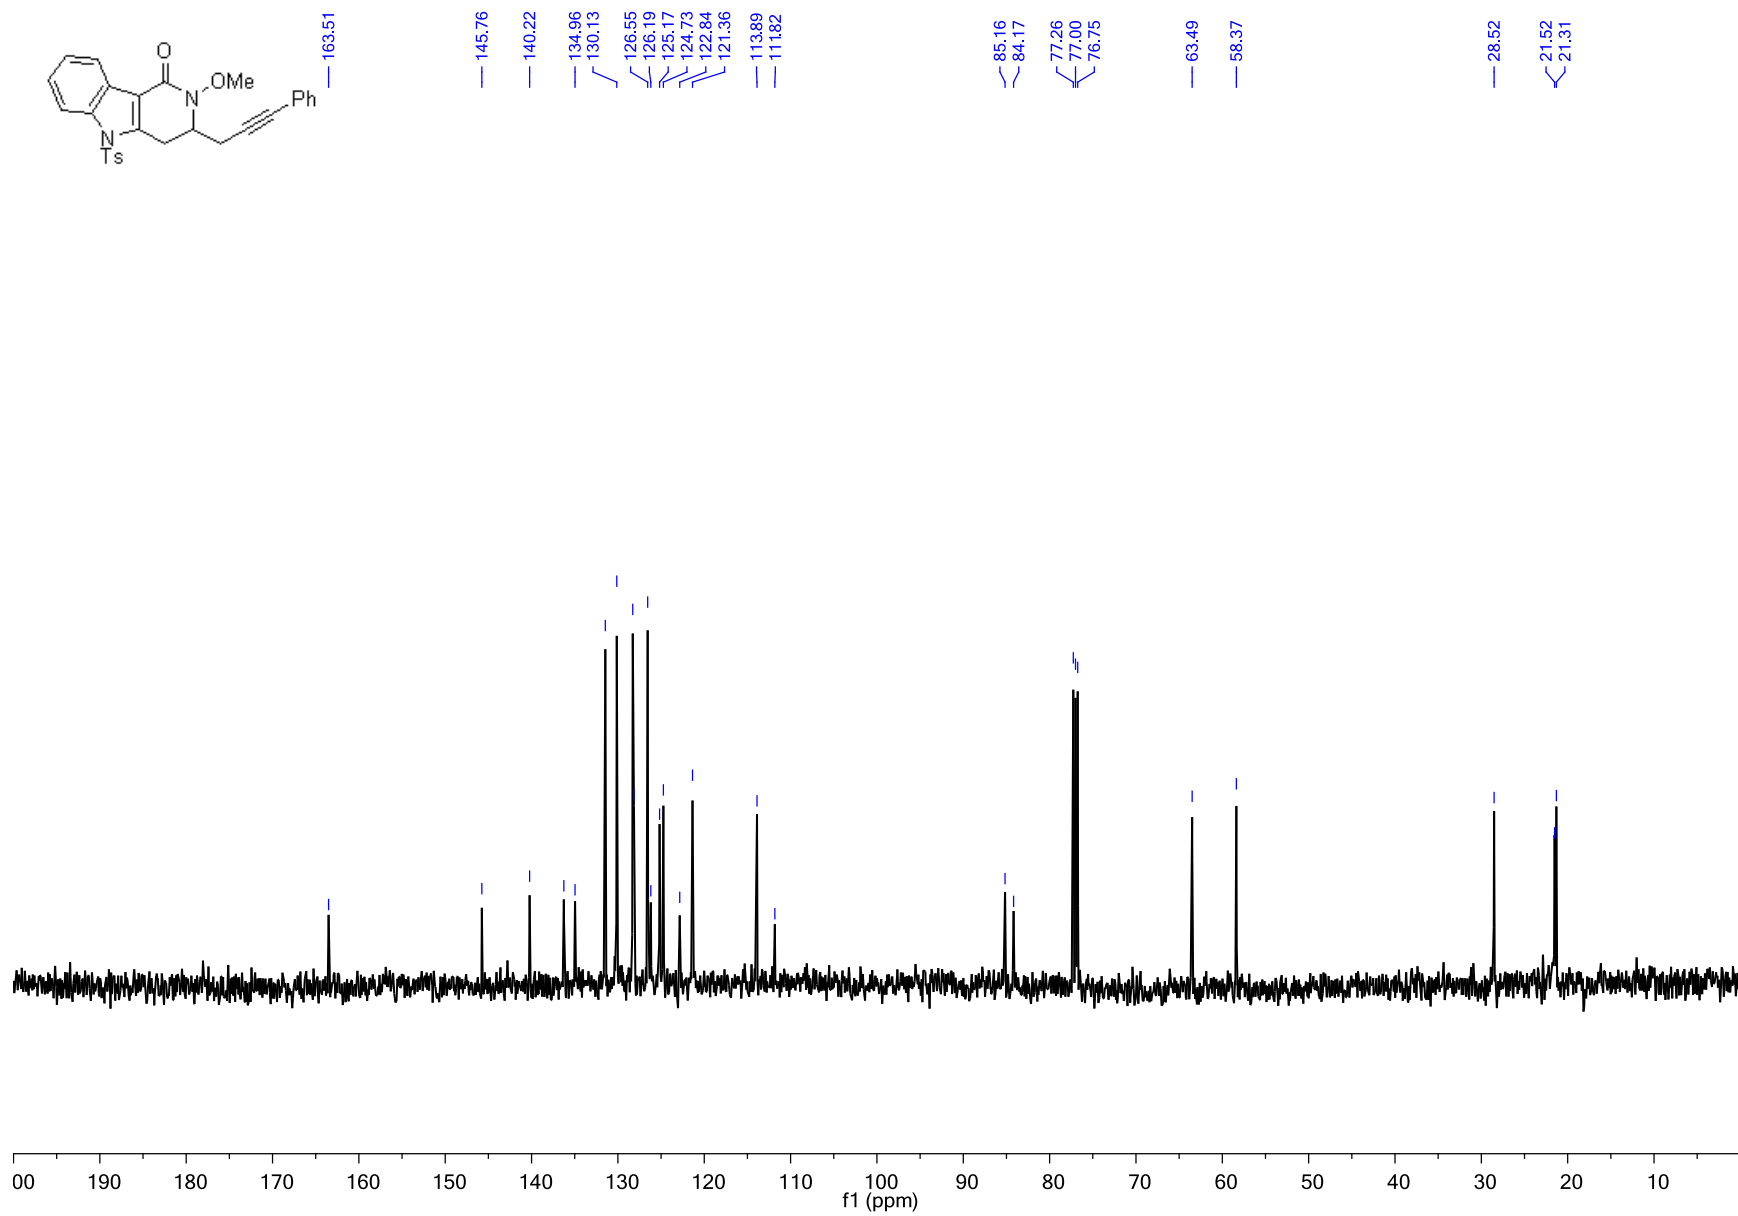

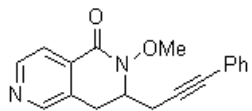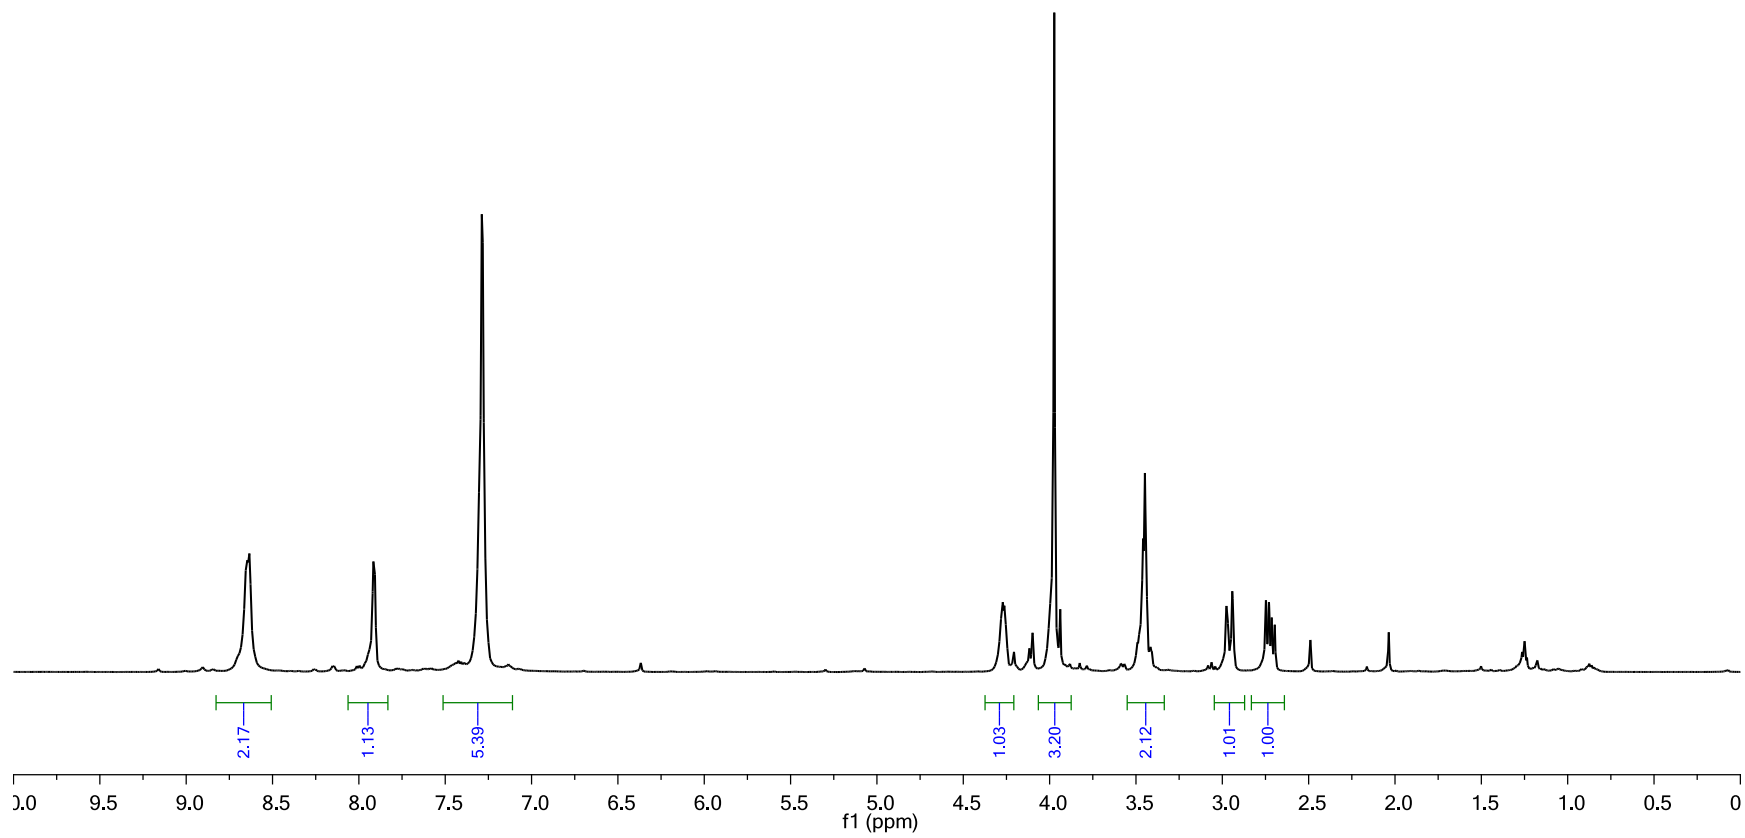

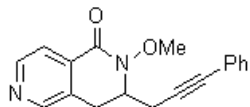

161.20

149.31  
148.93

135.21

131.46

129.38

128.20

122.63

120.56

84.52  
84.30

77.26  
77.00  
76.75

63.14

57.71

29.81

22.33

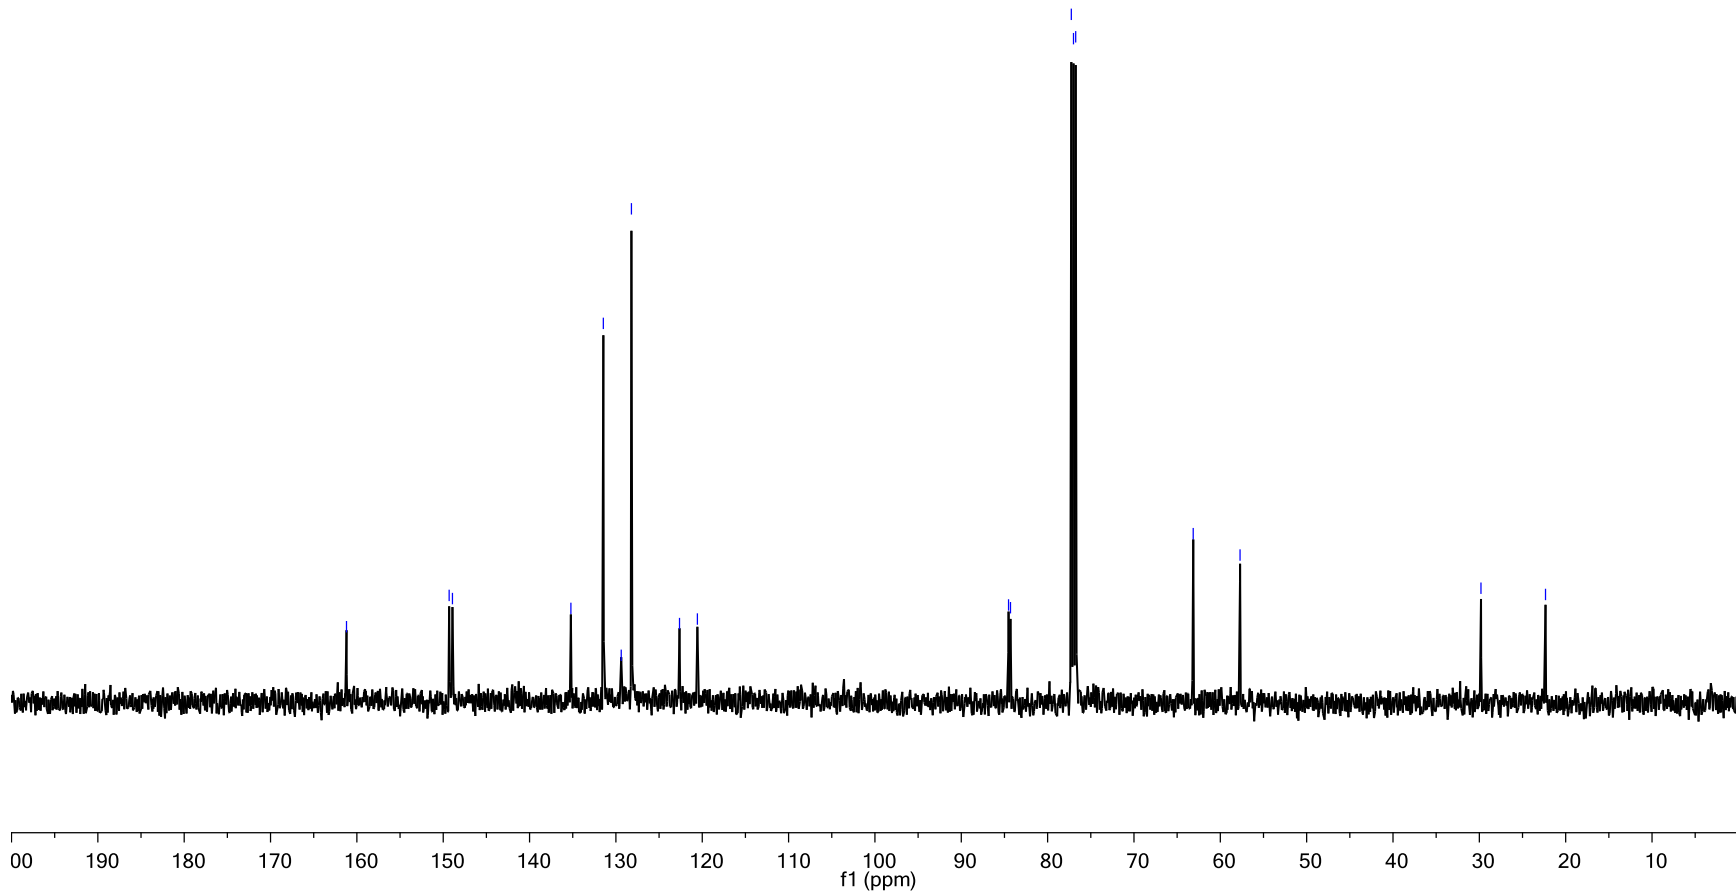

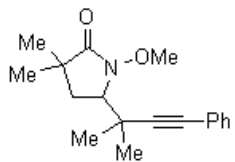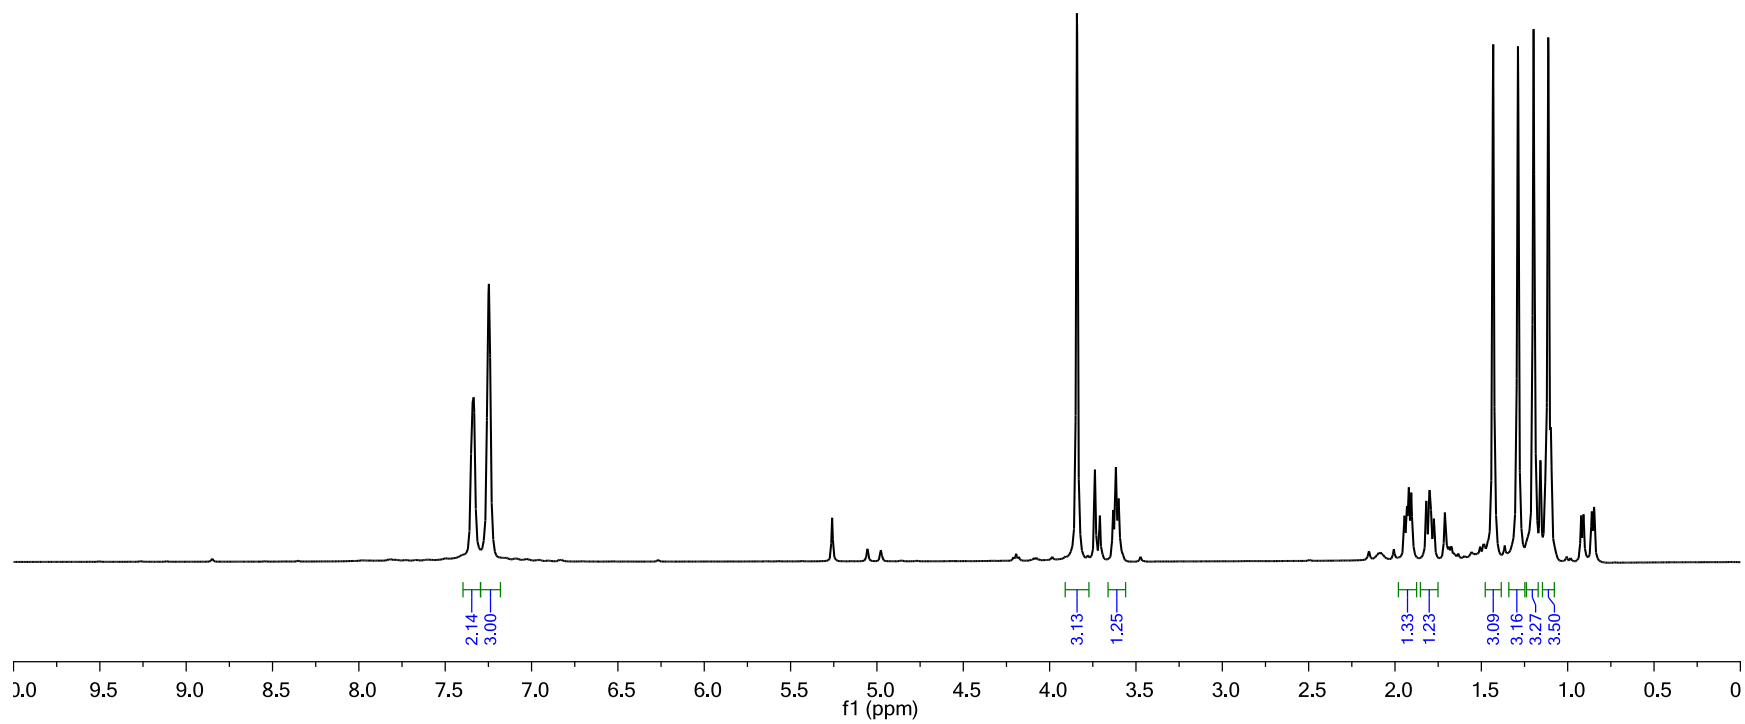



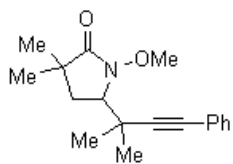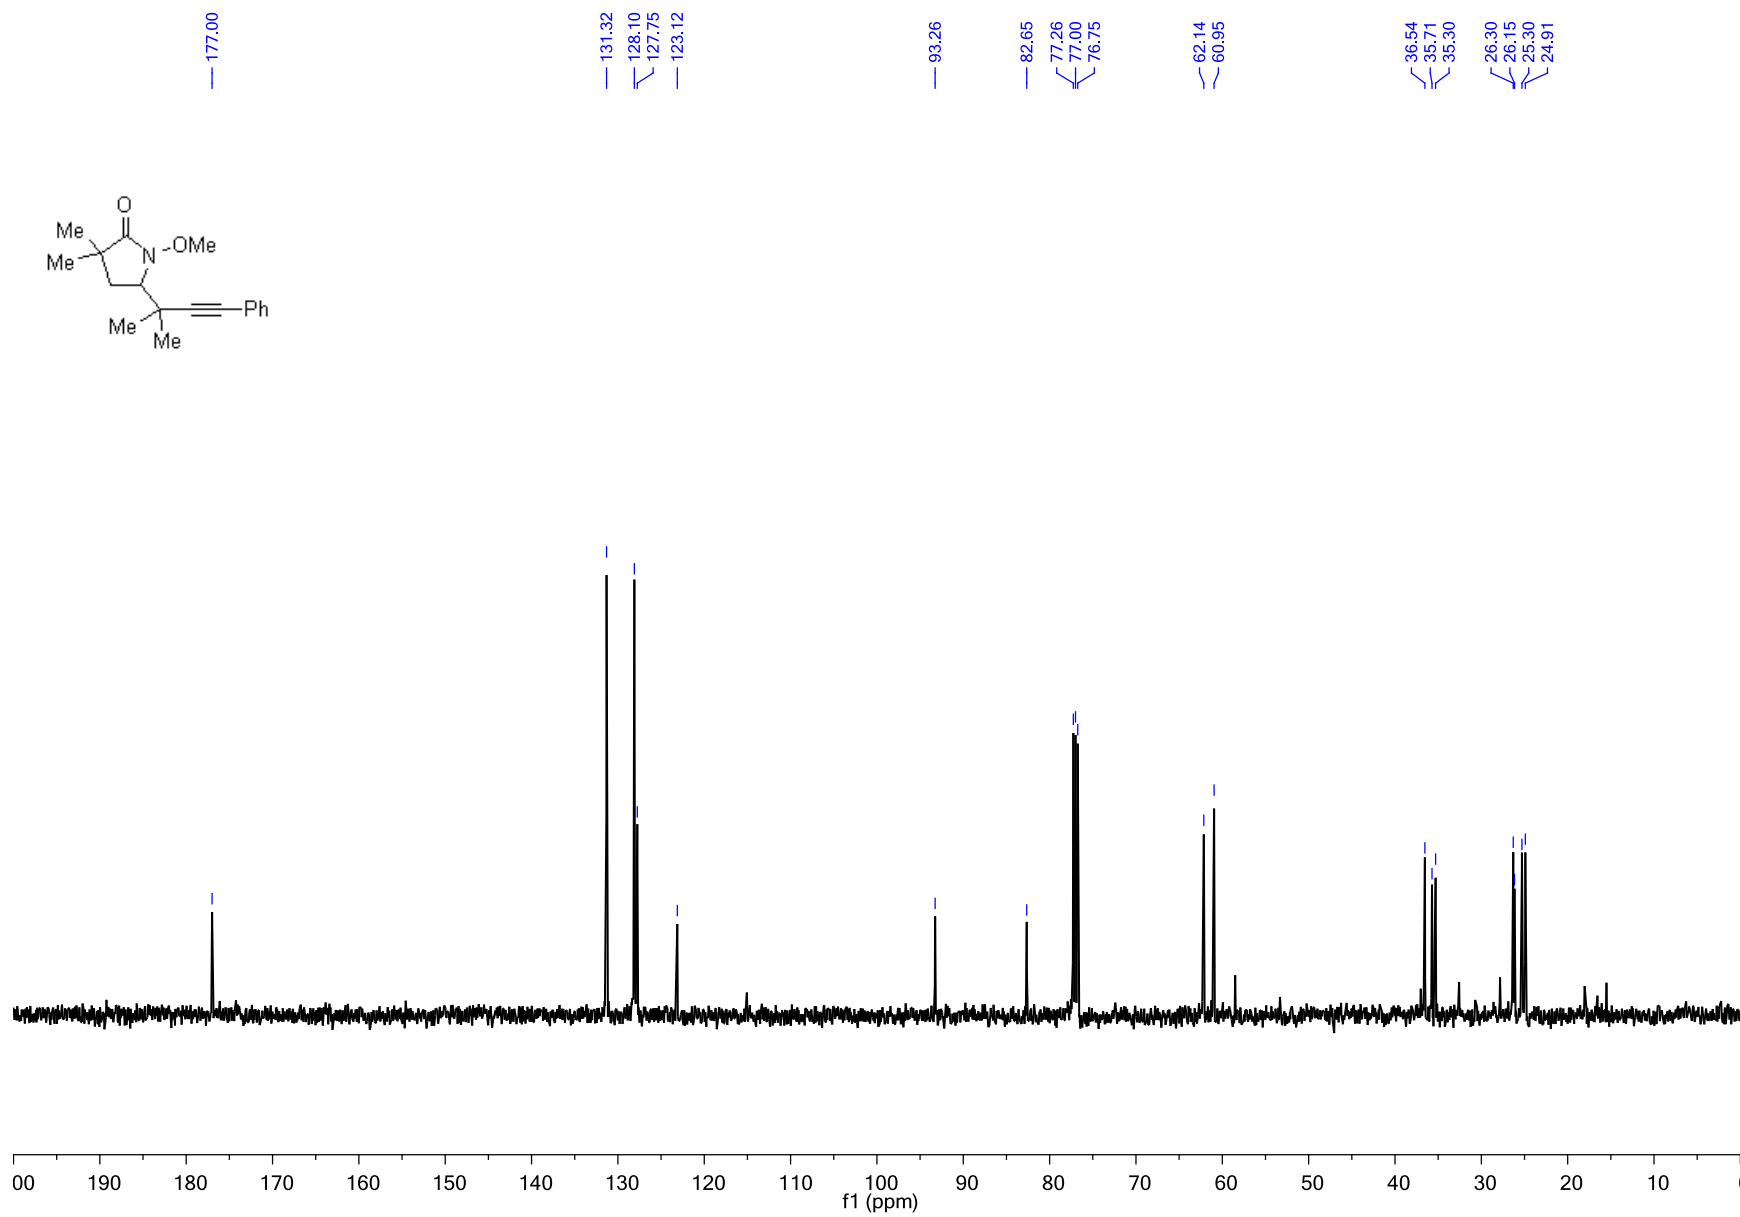

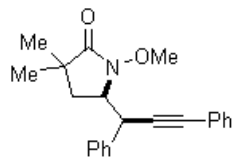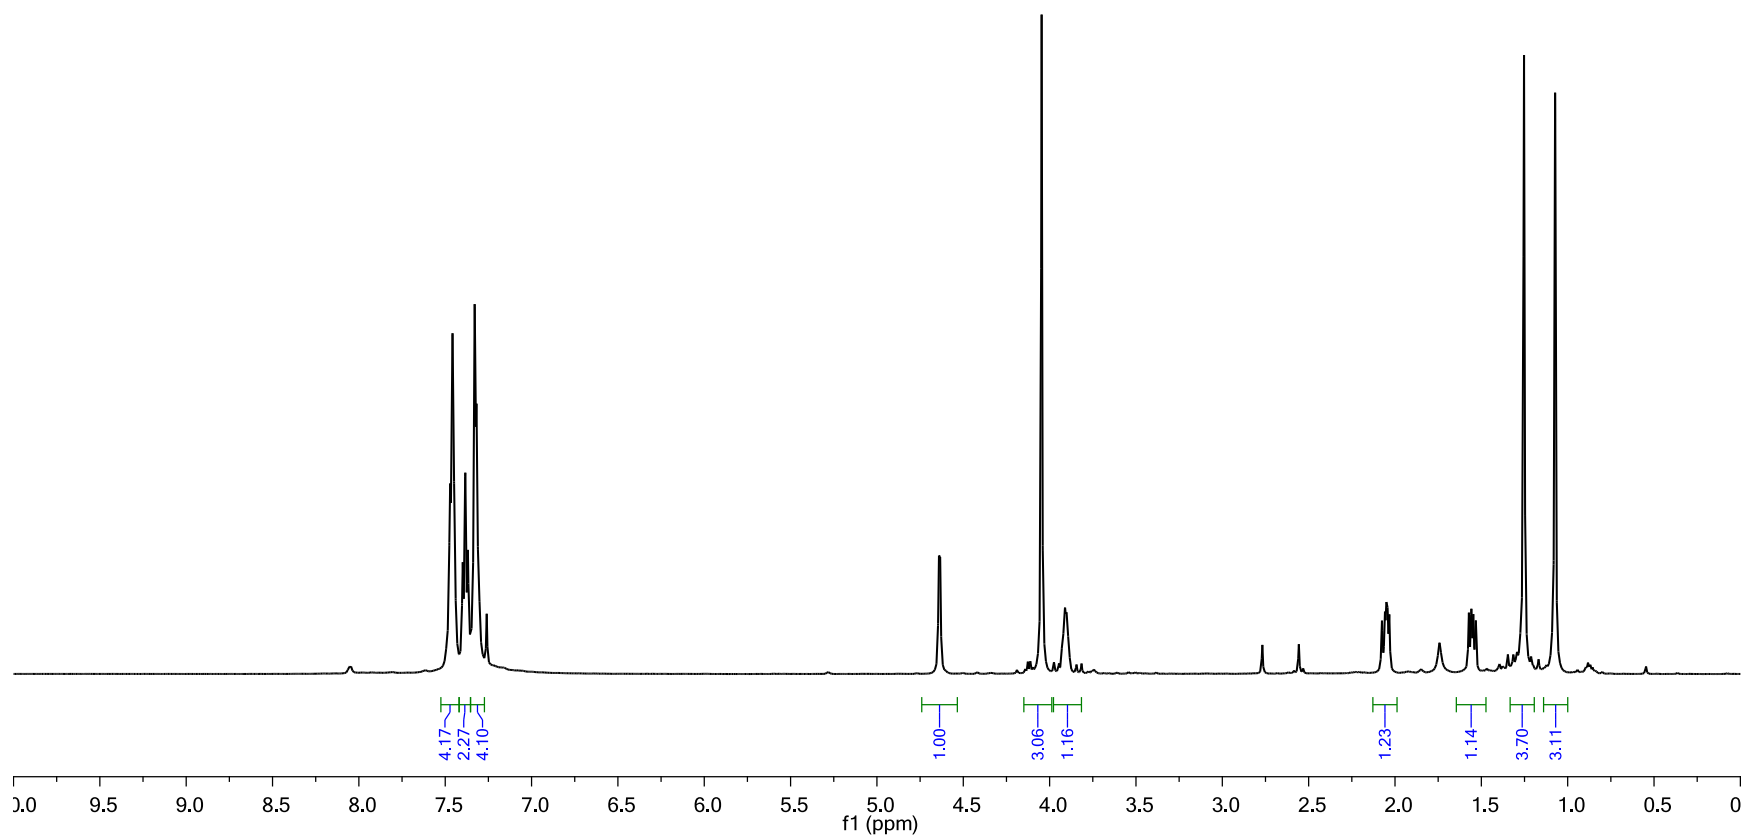

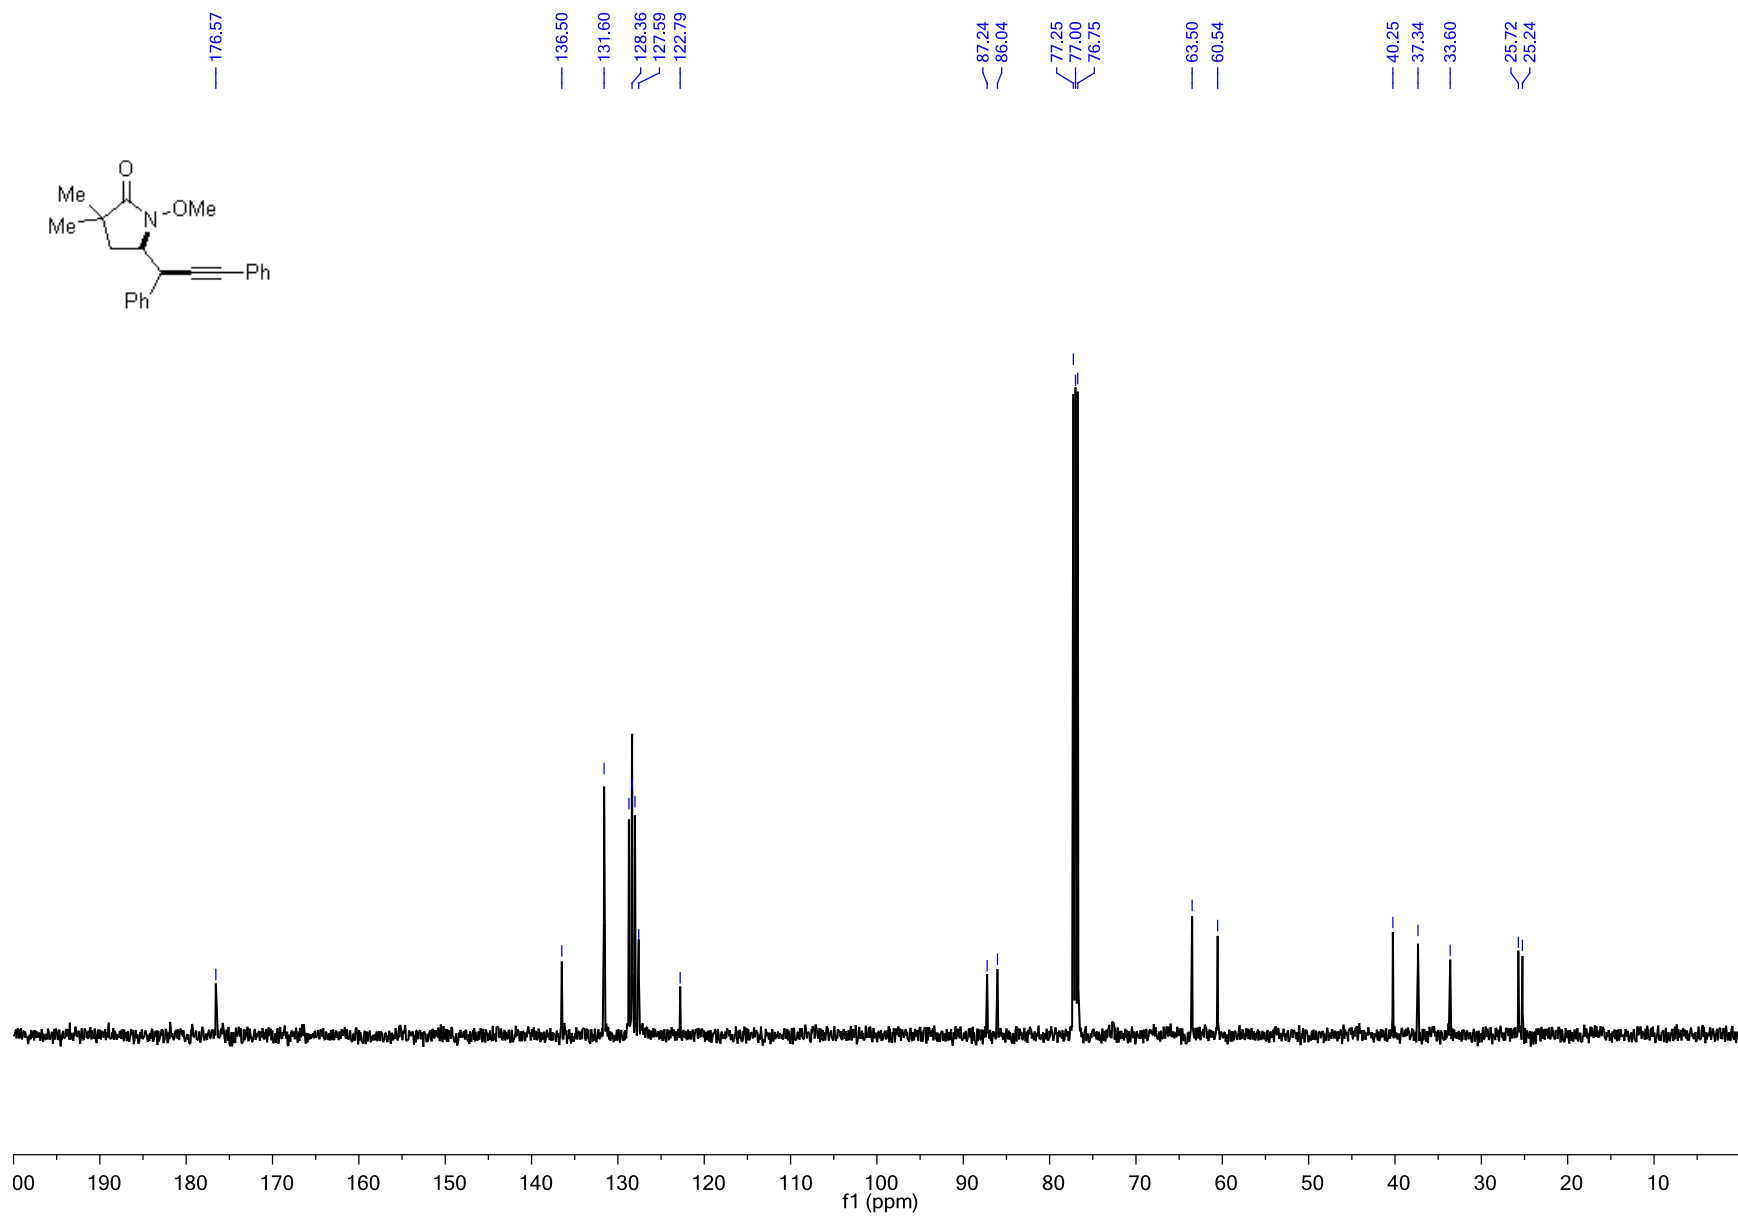

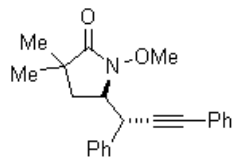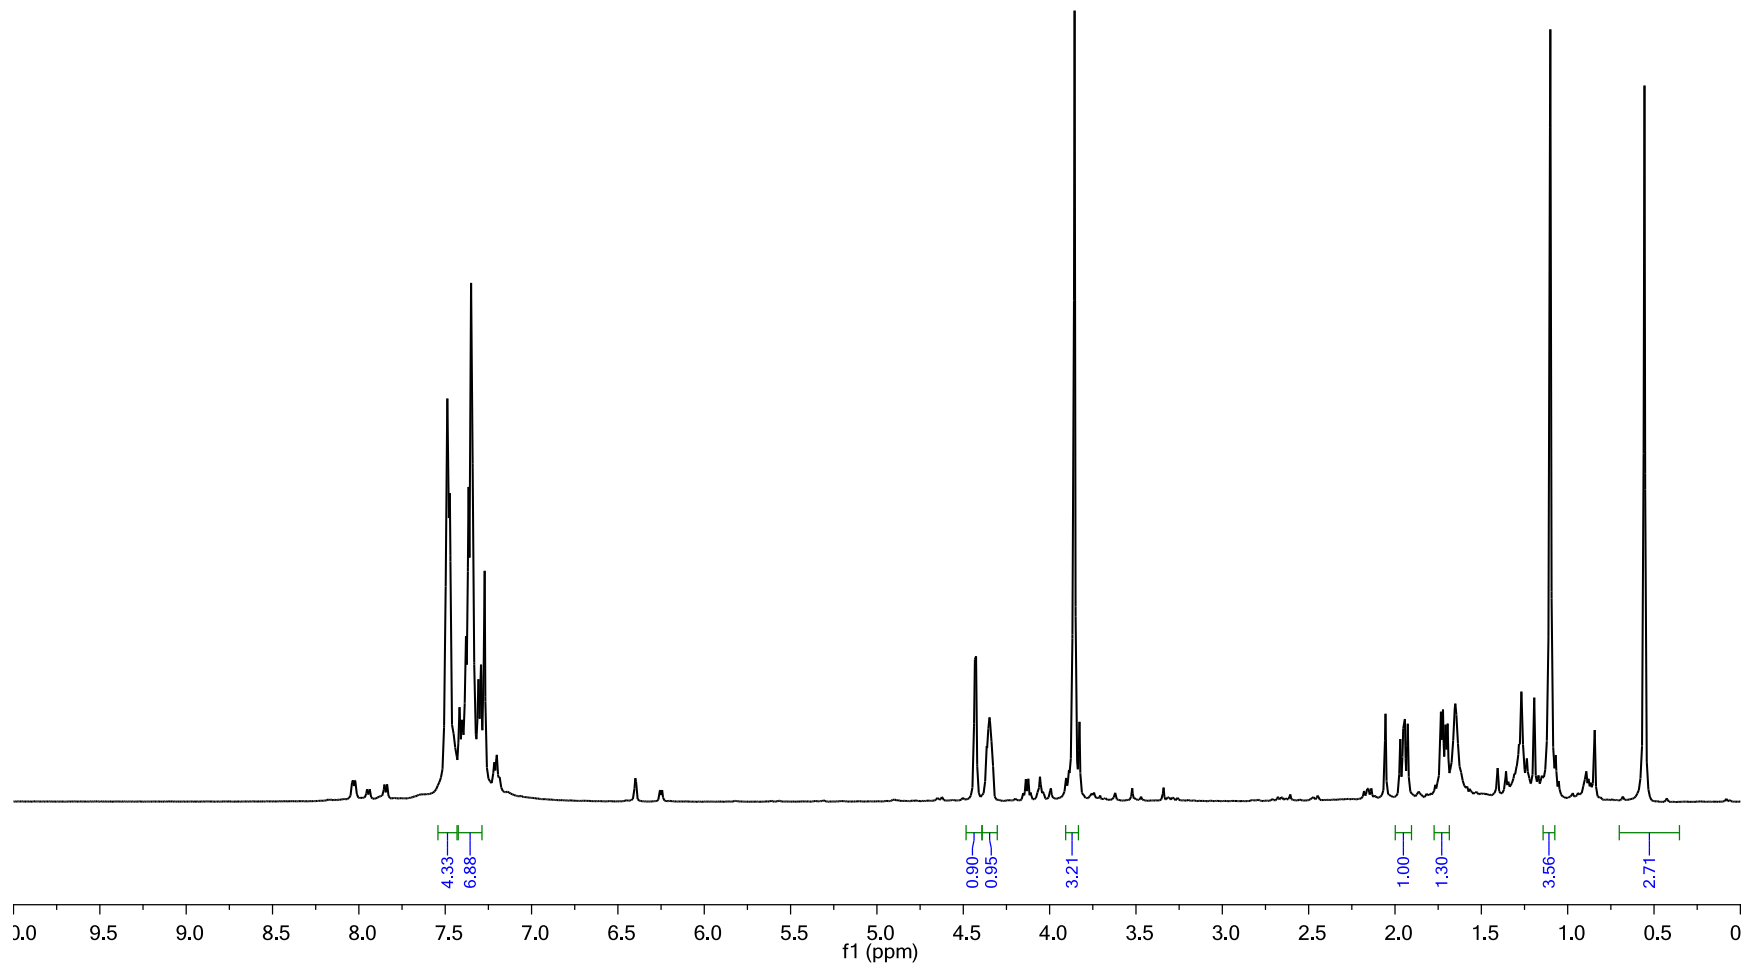

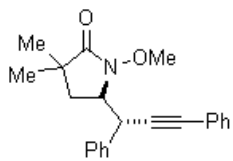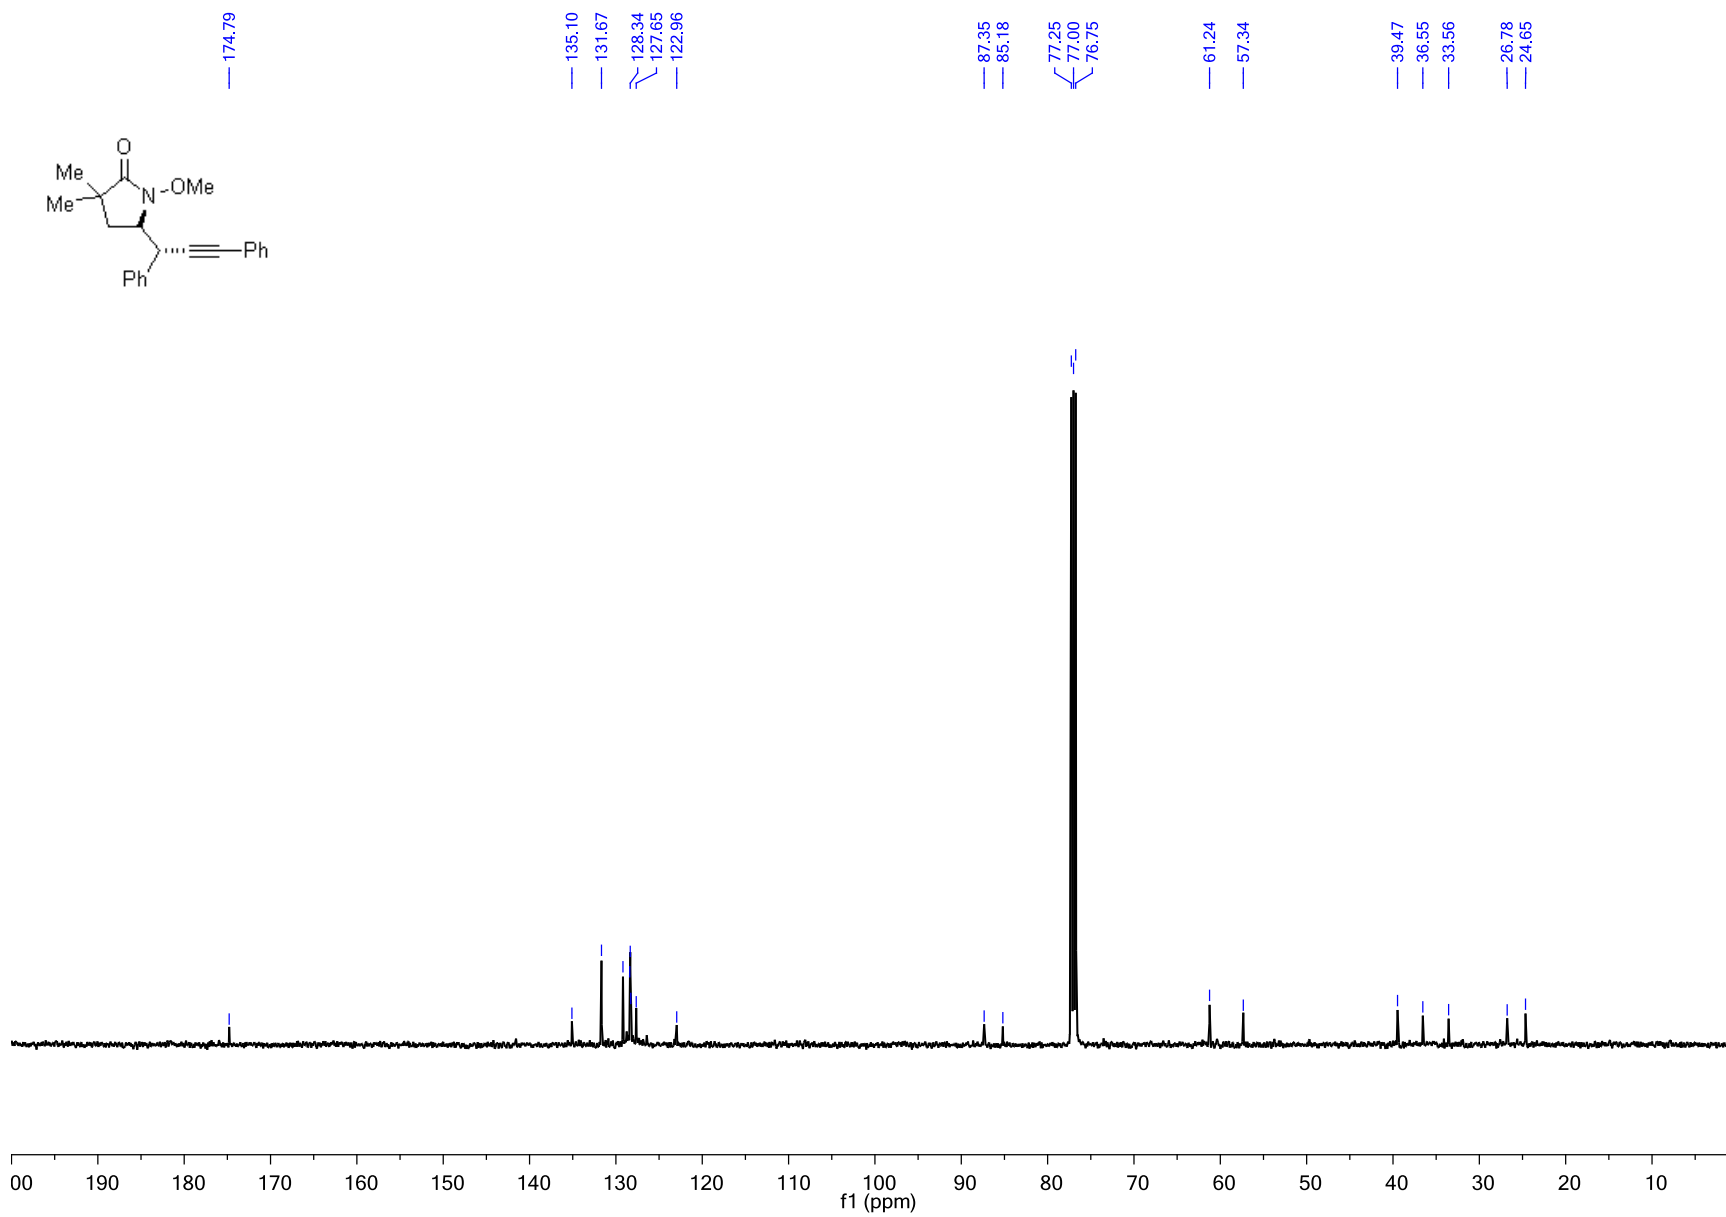

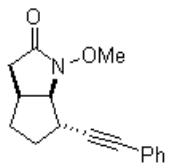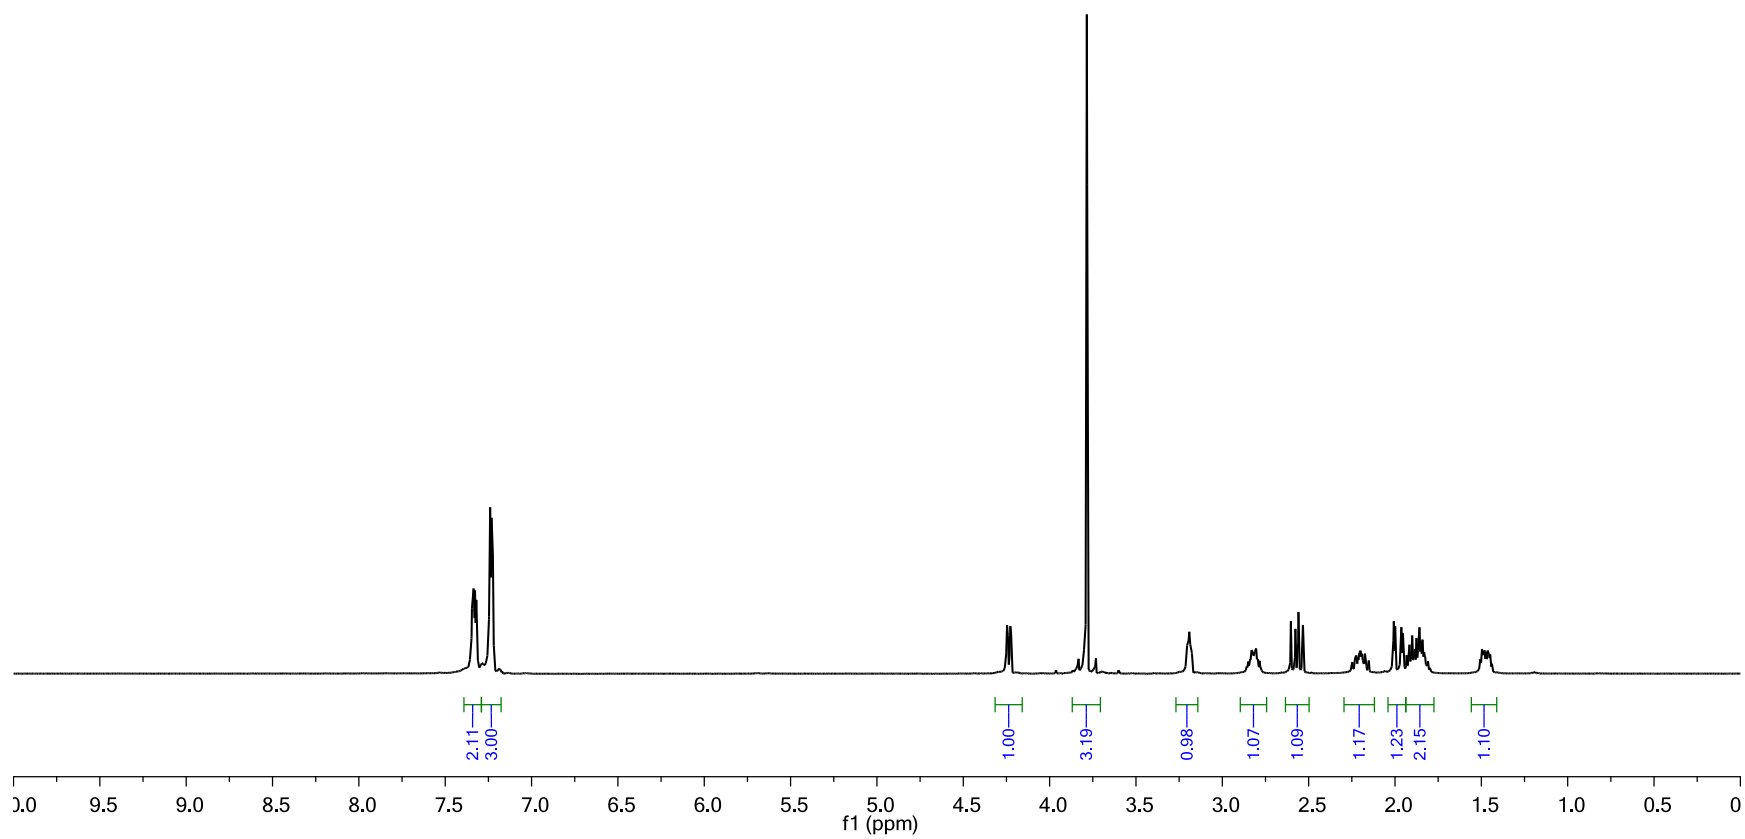

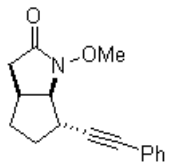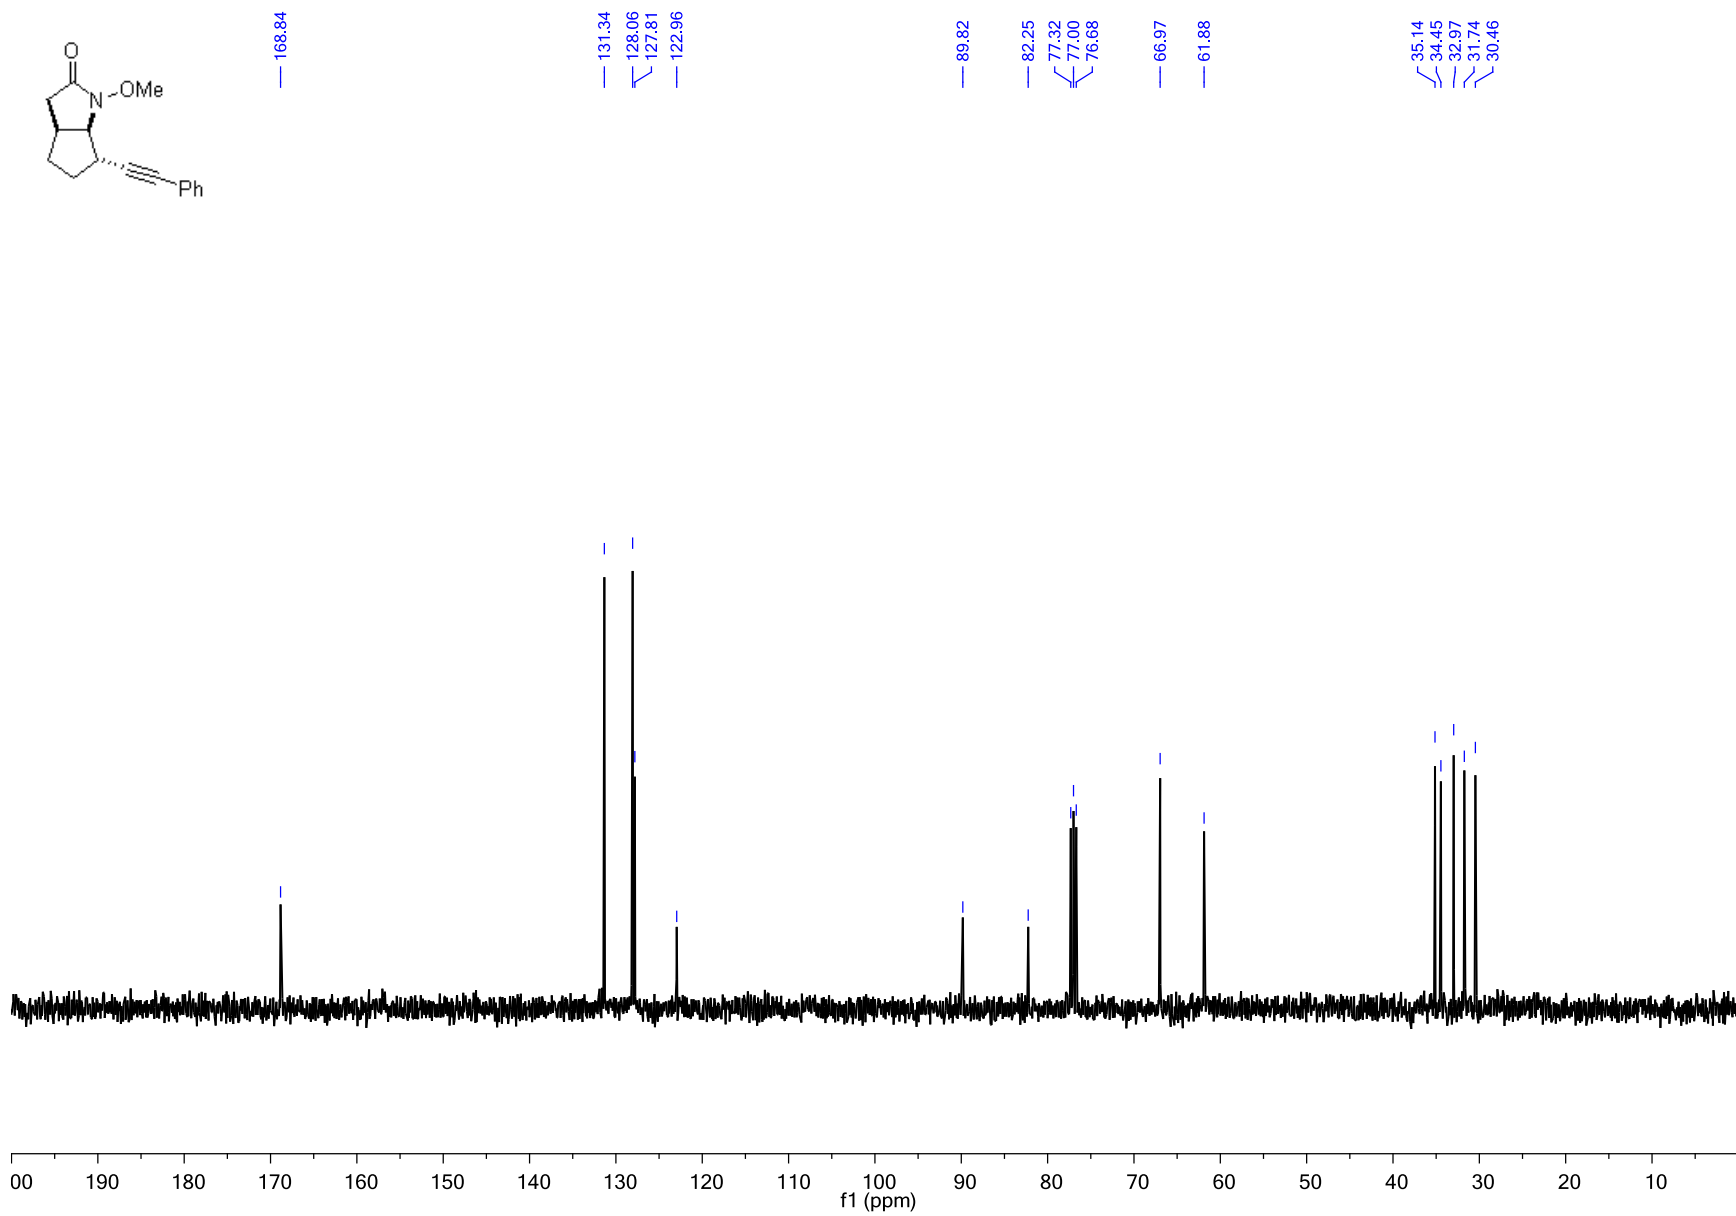

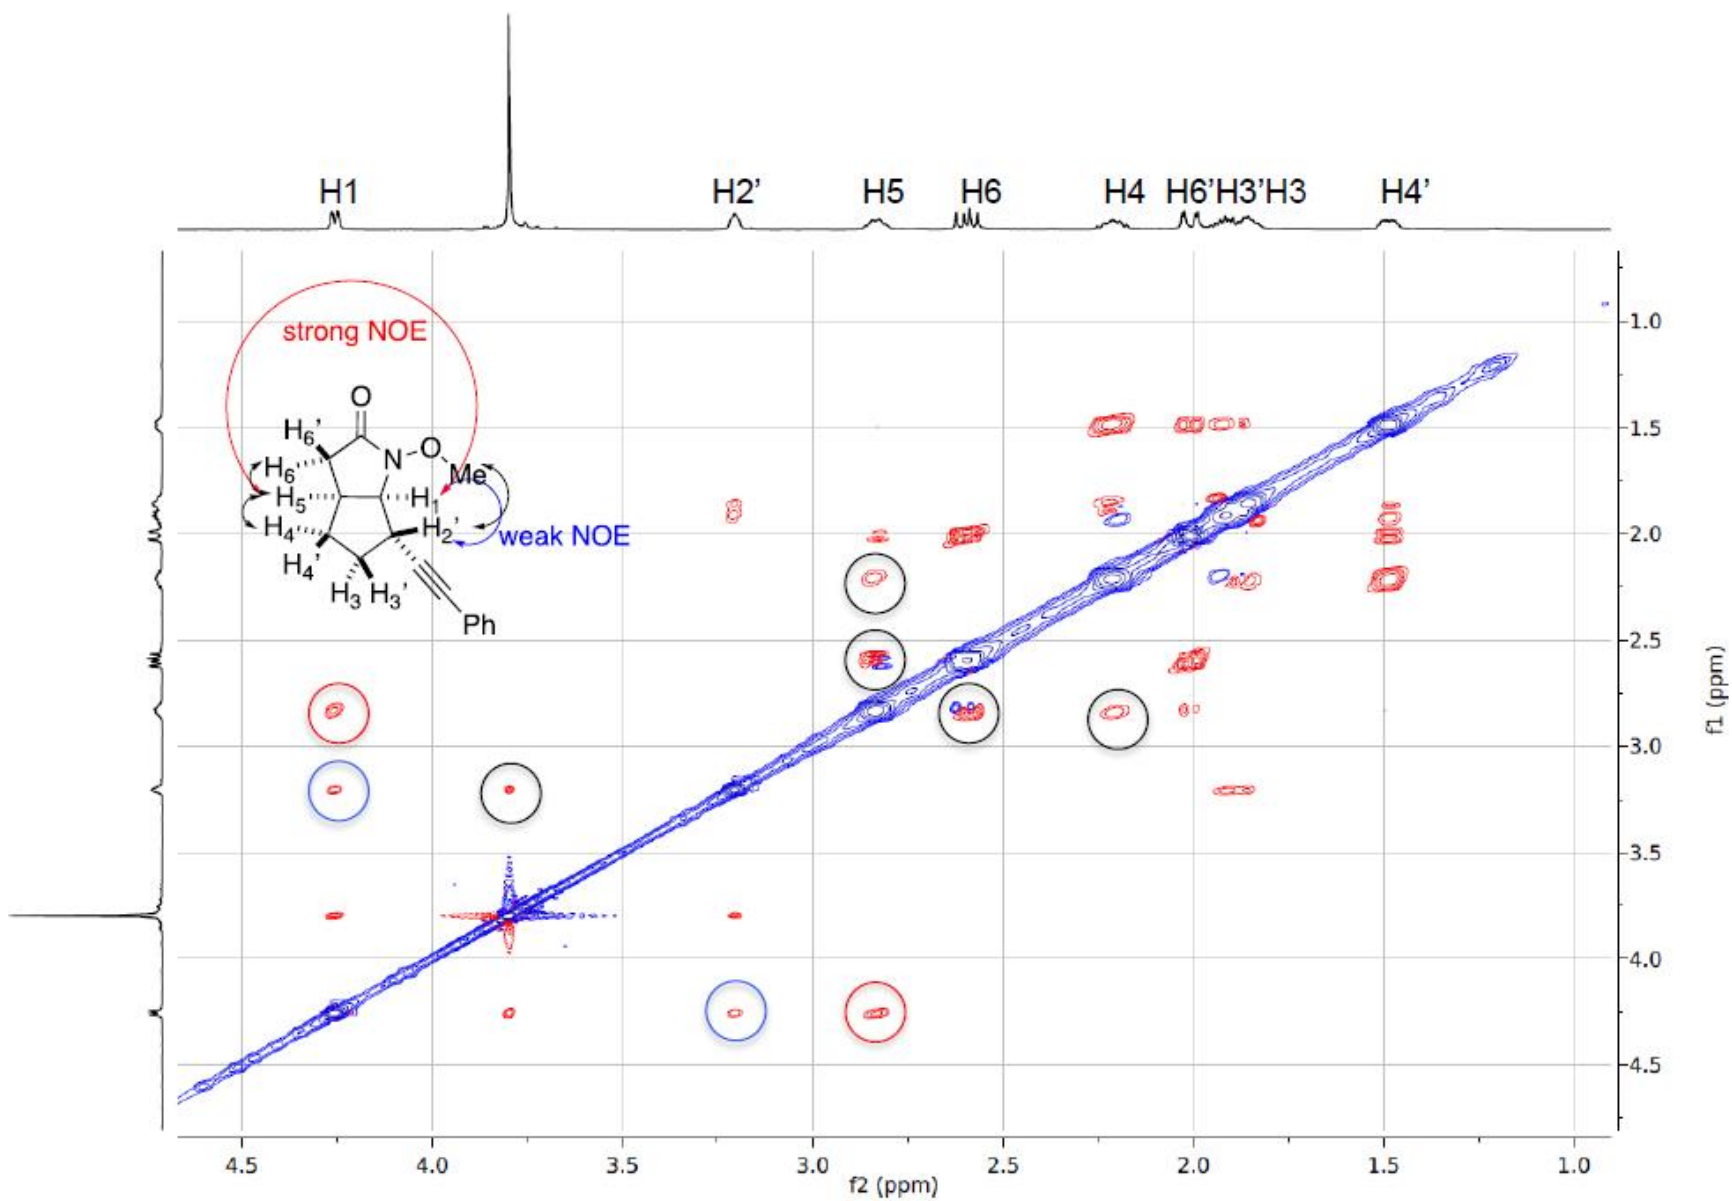



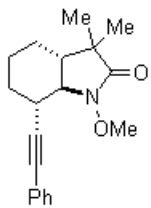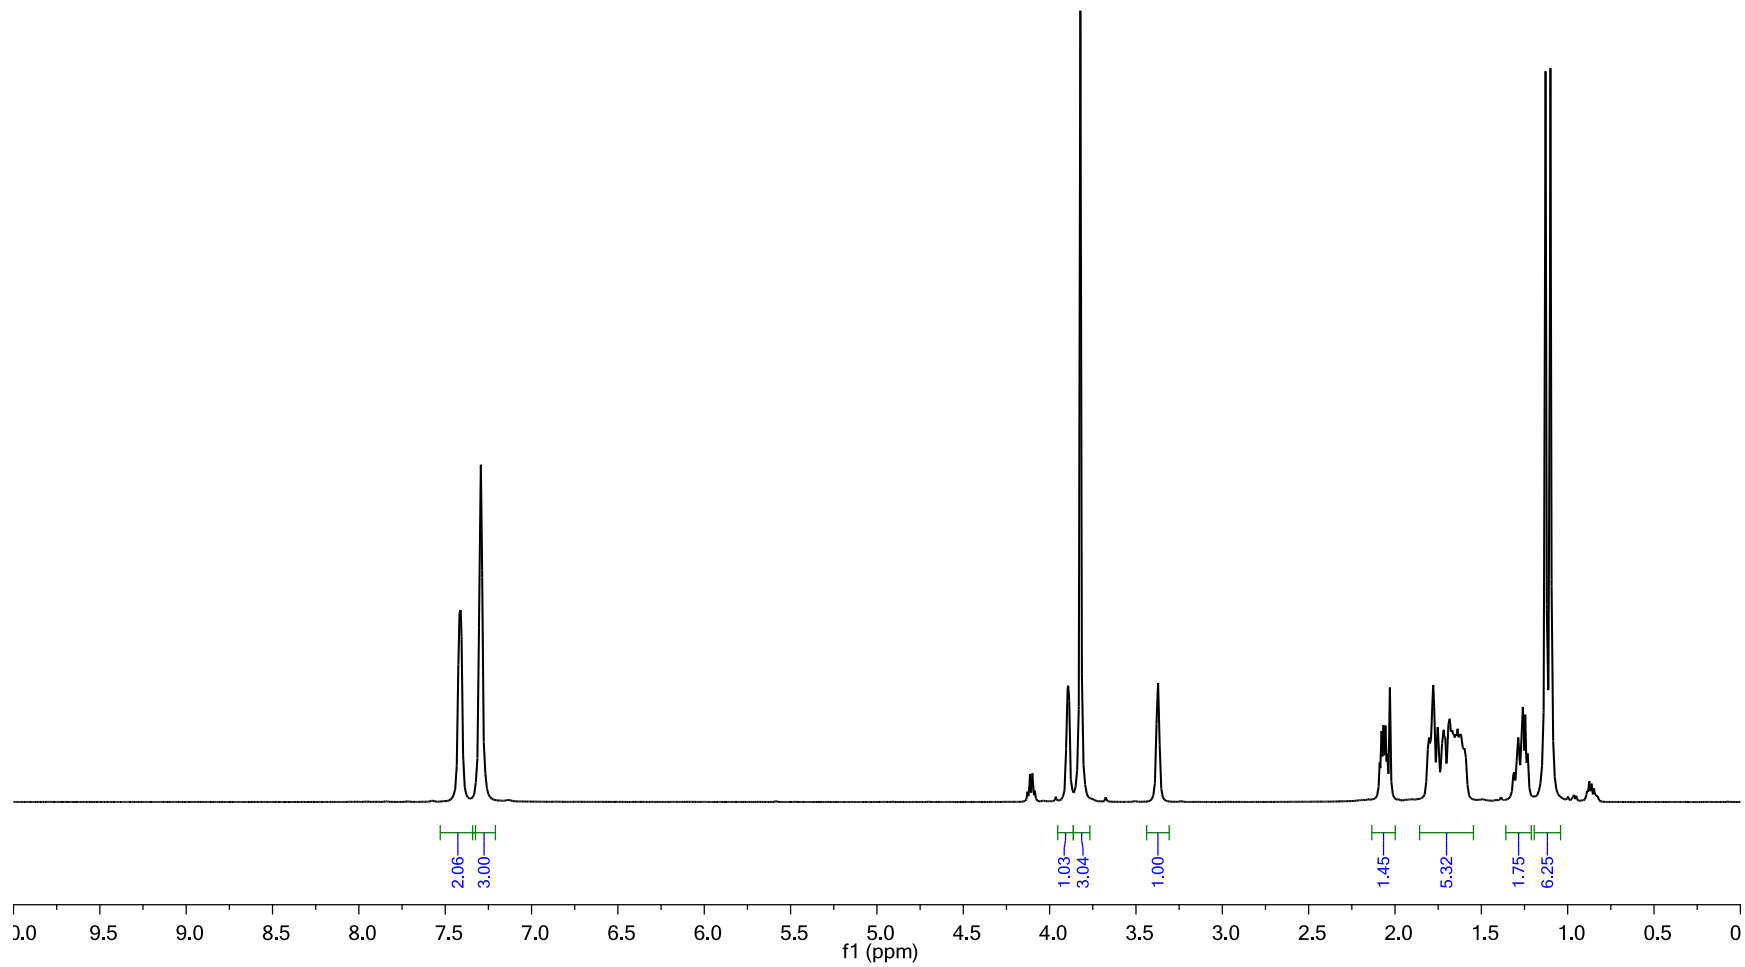

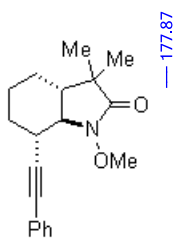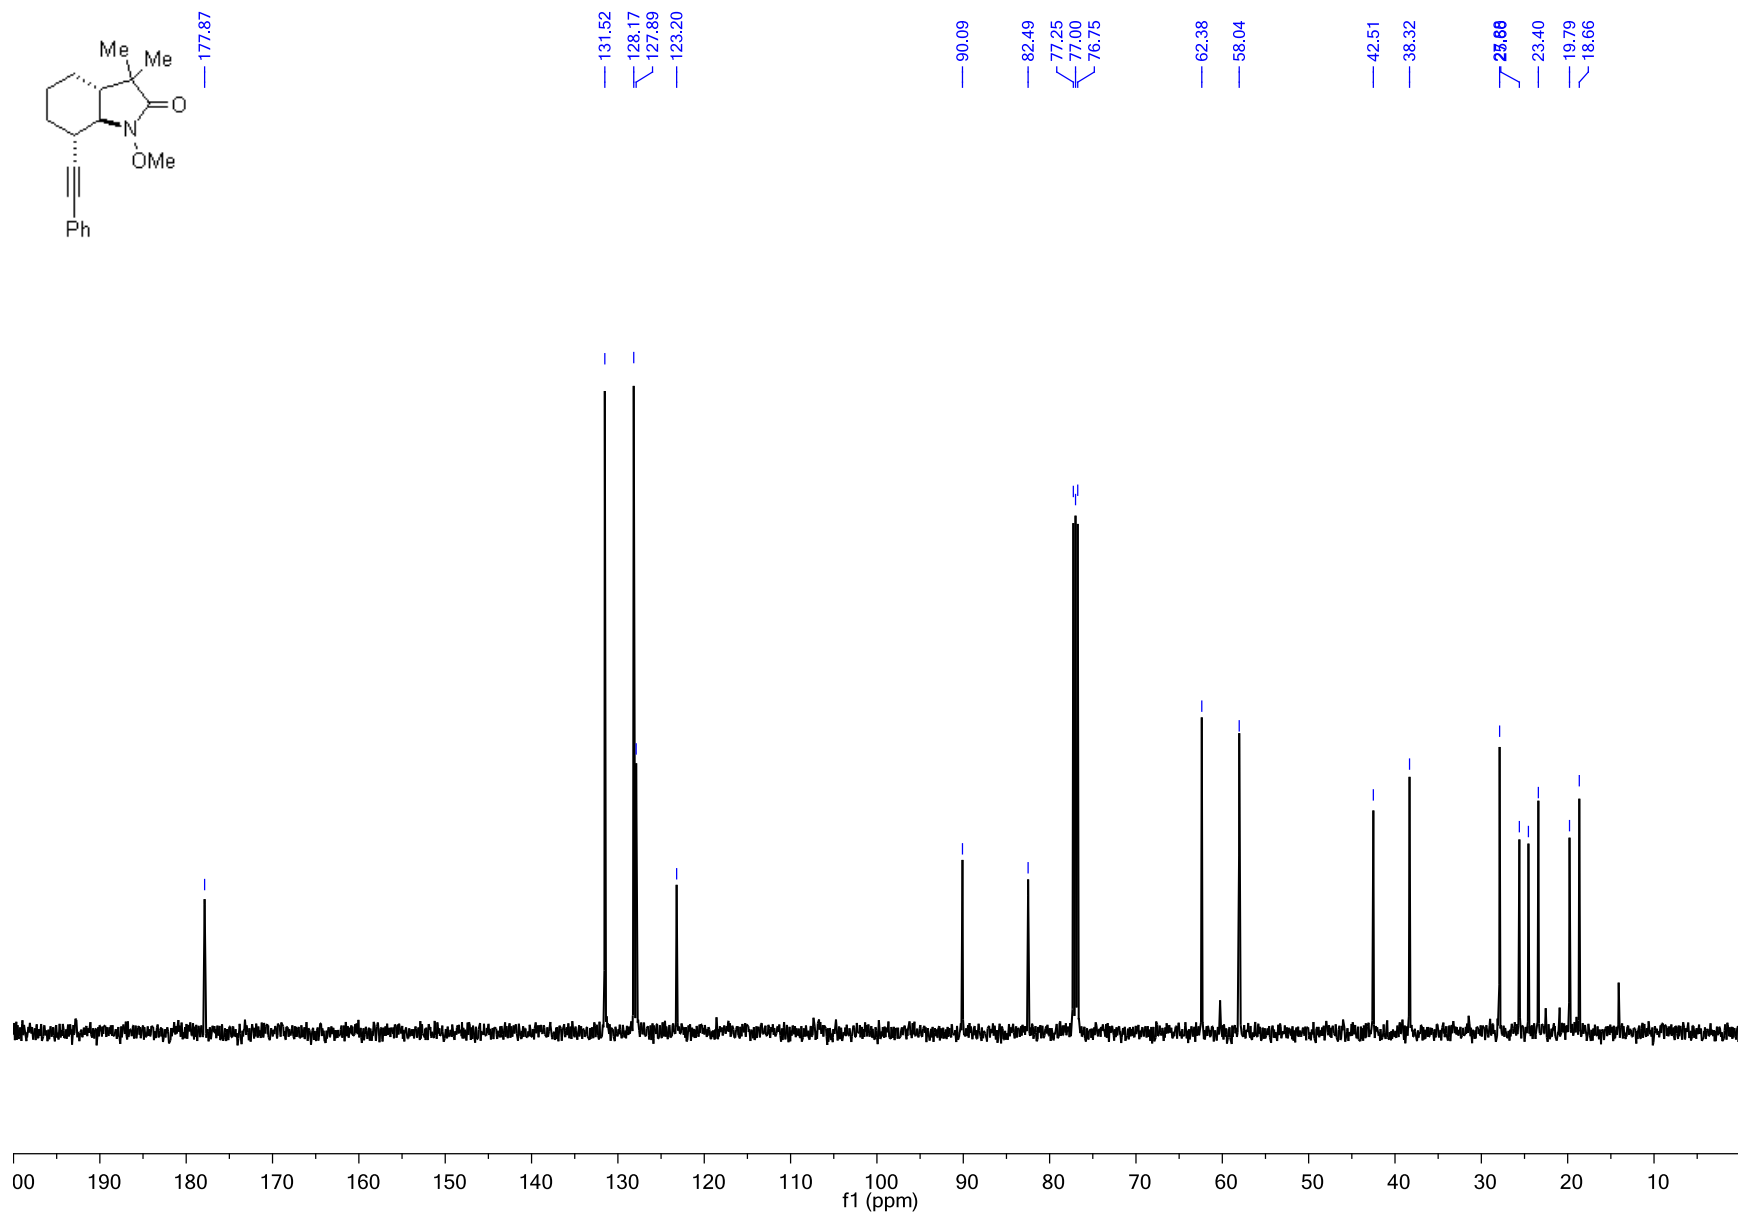

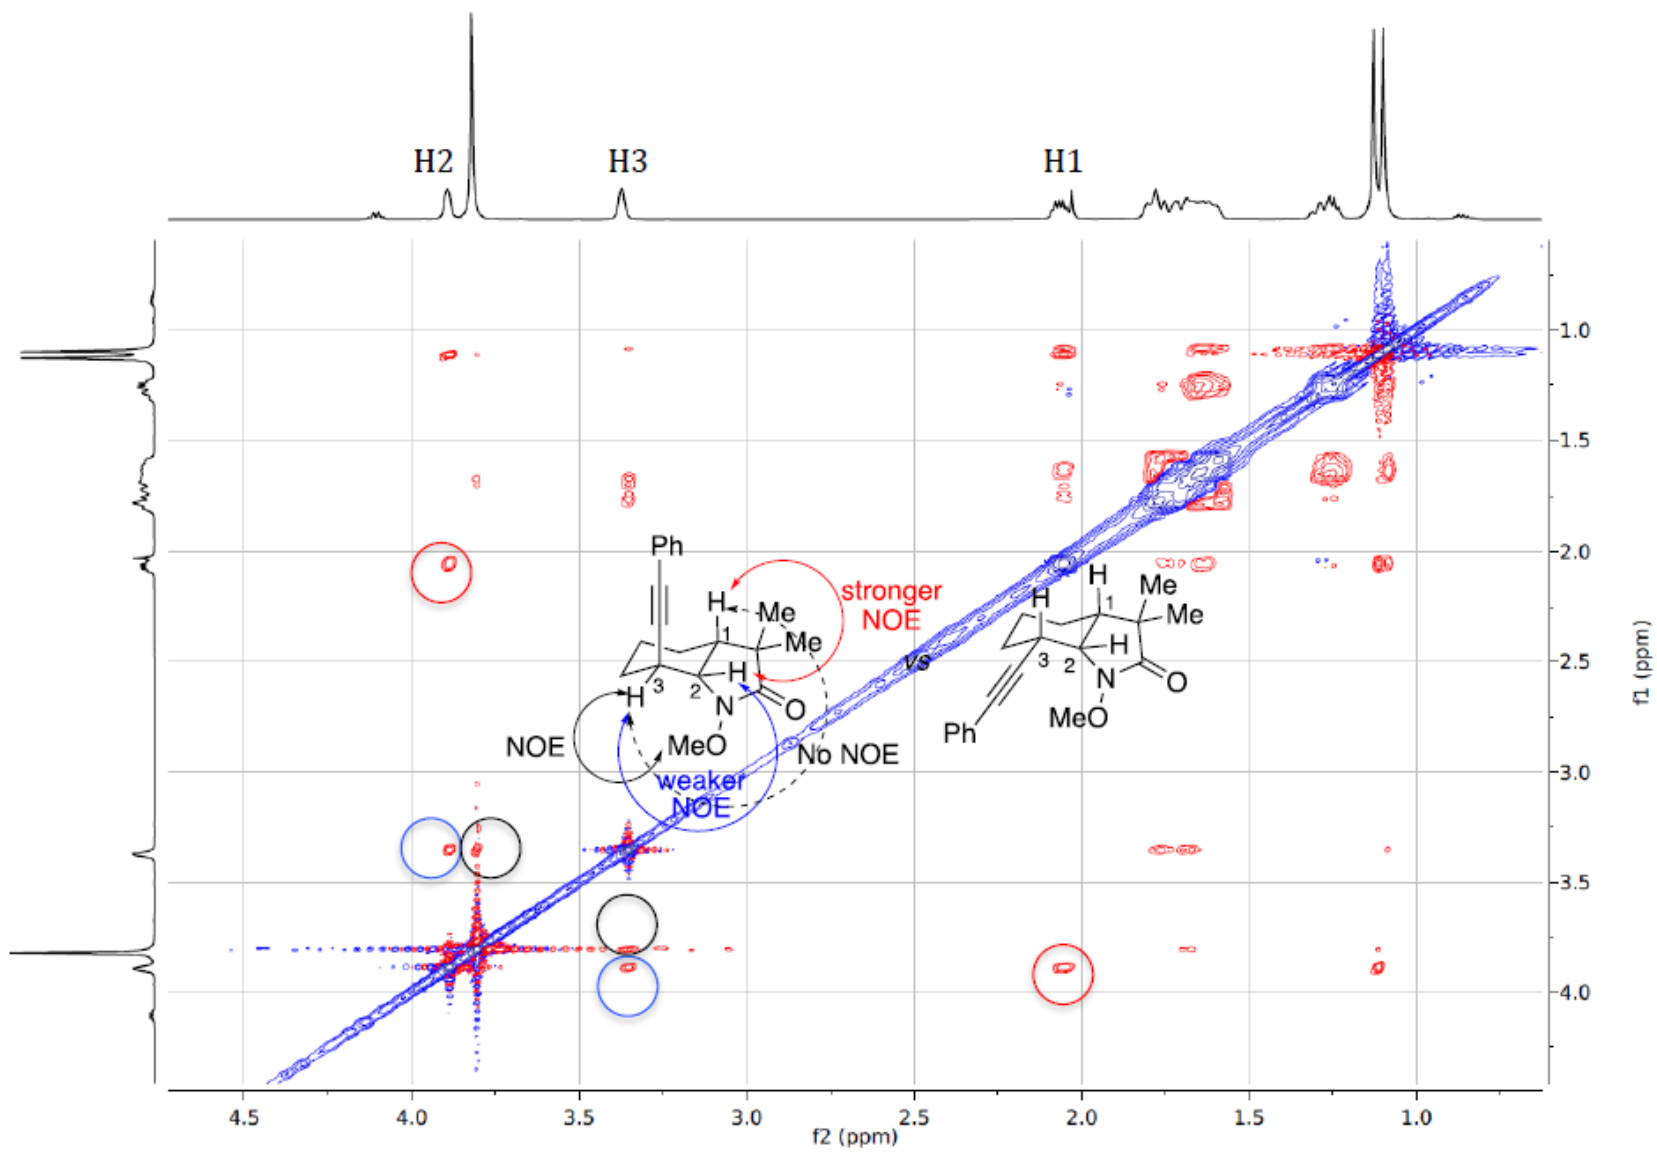

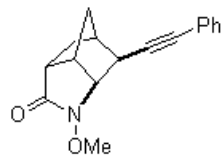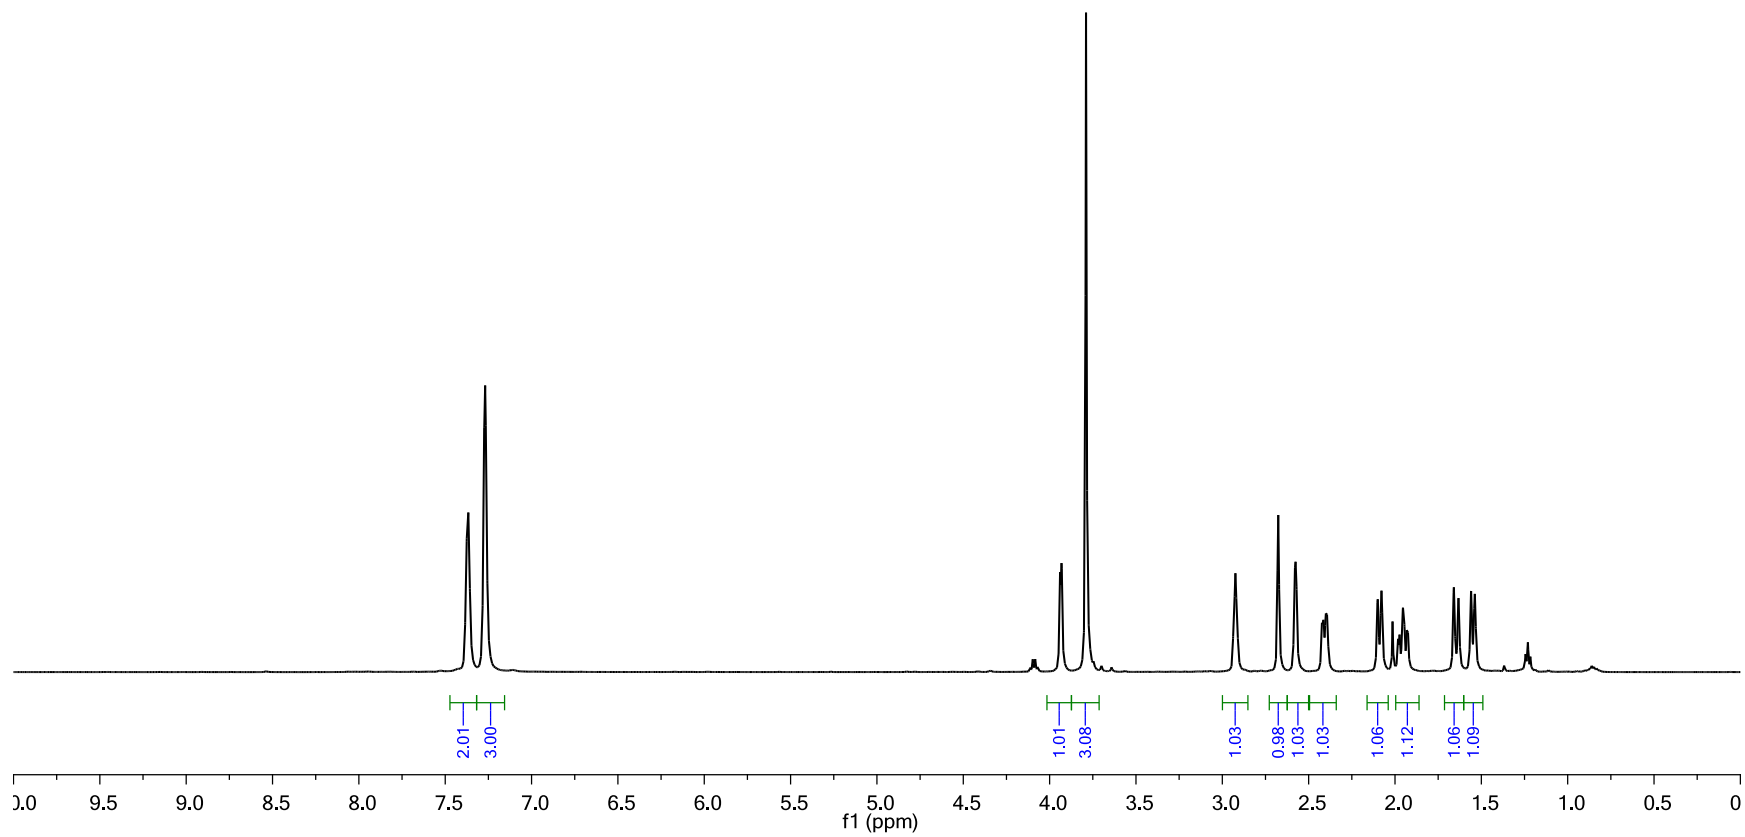

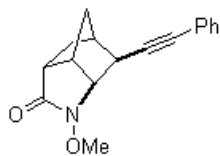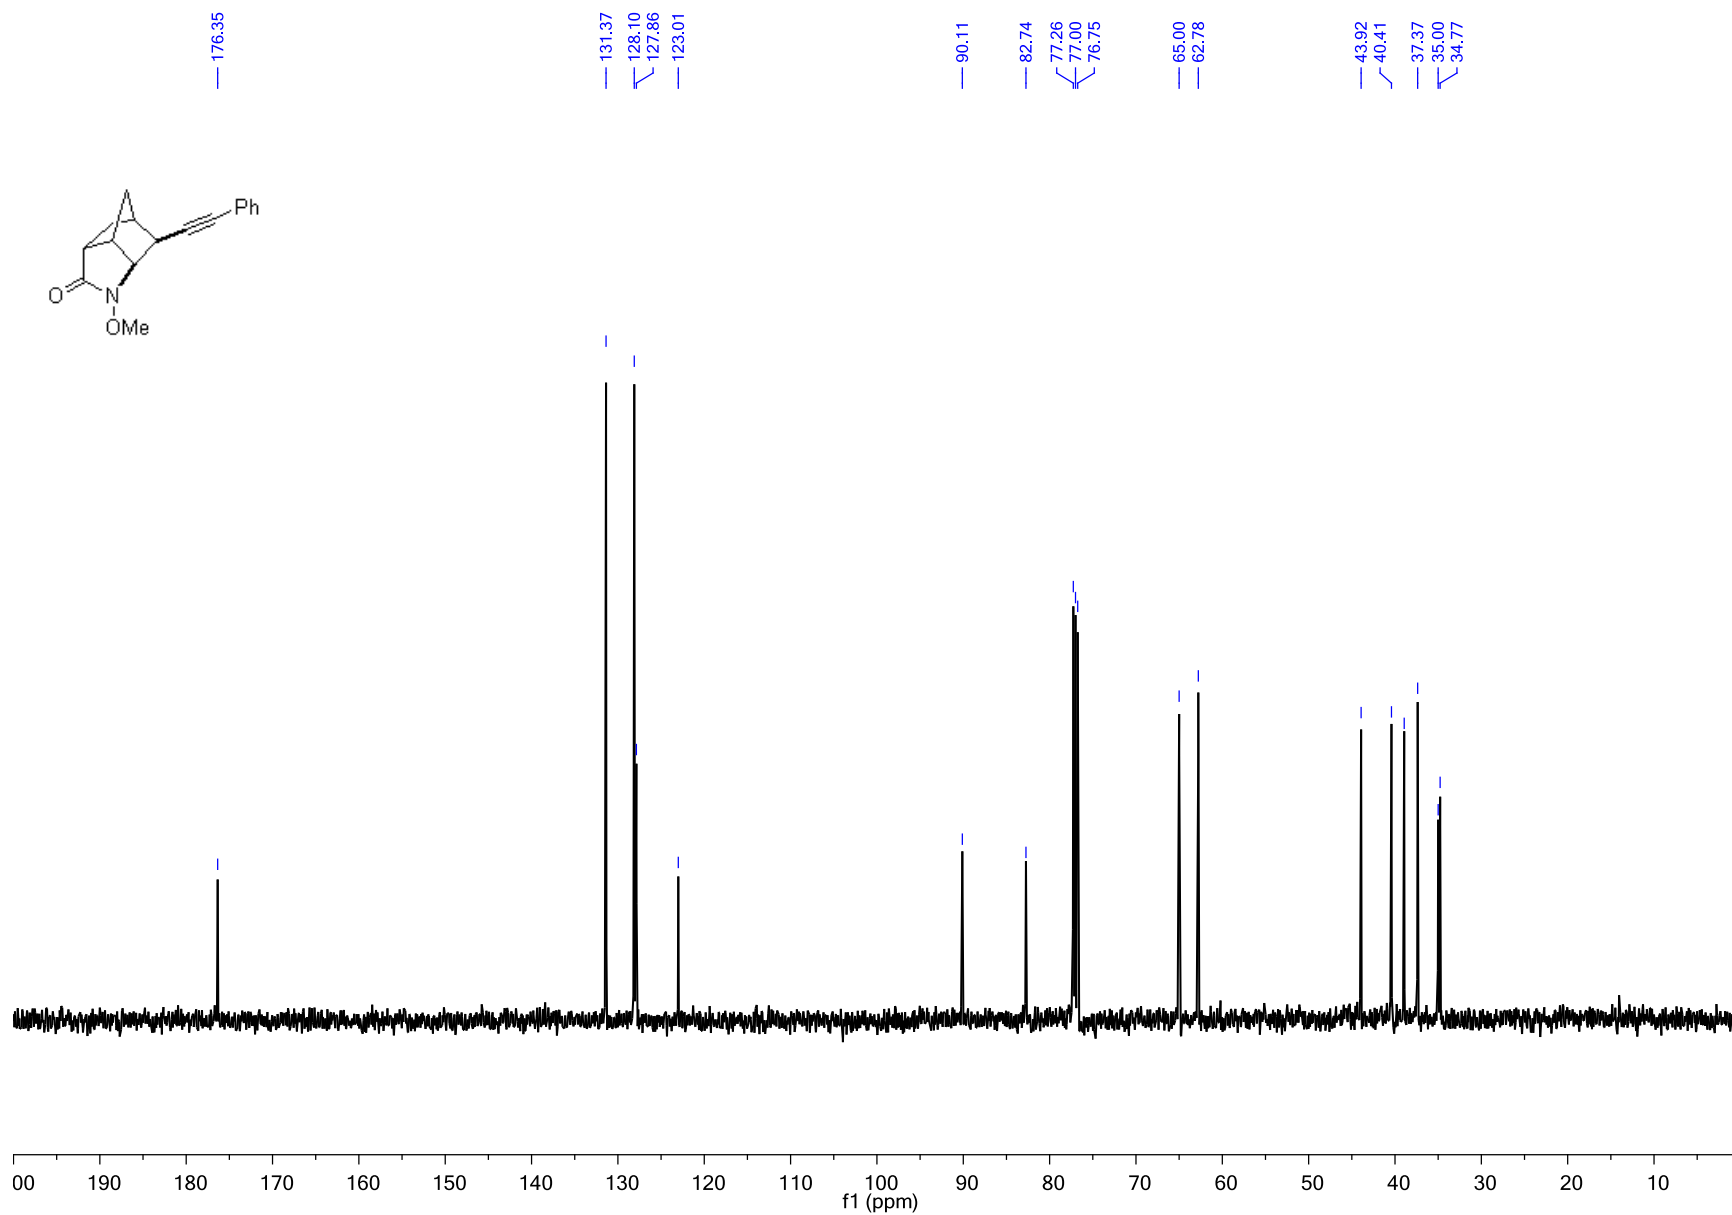

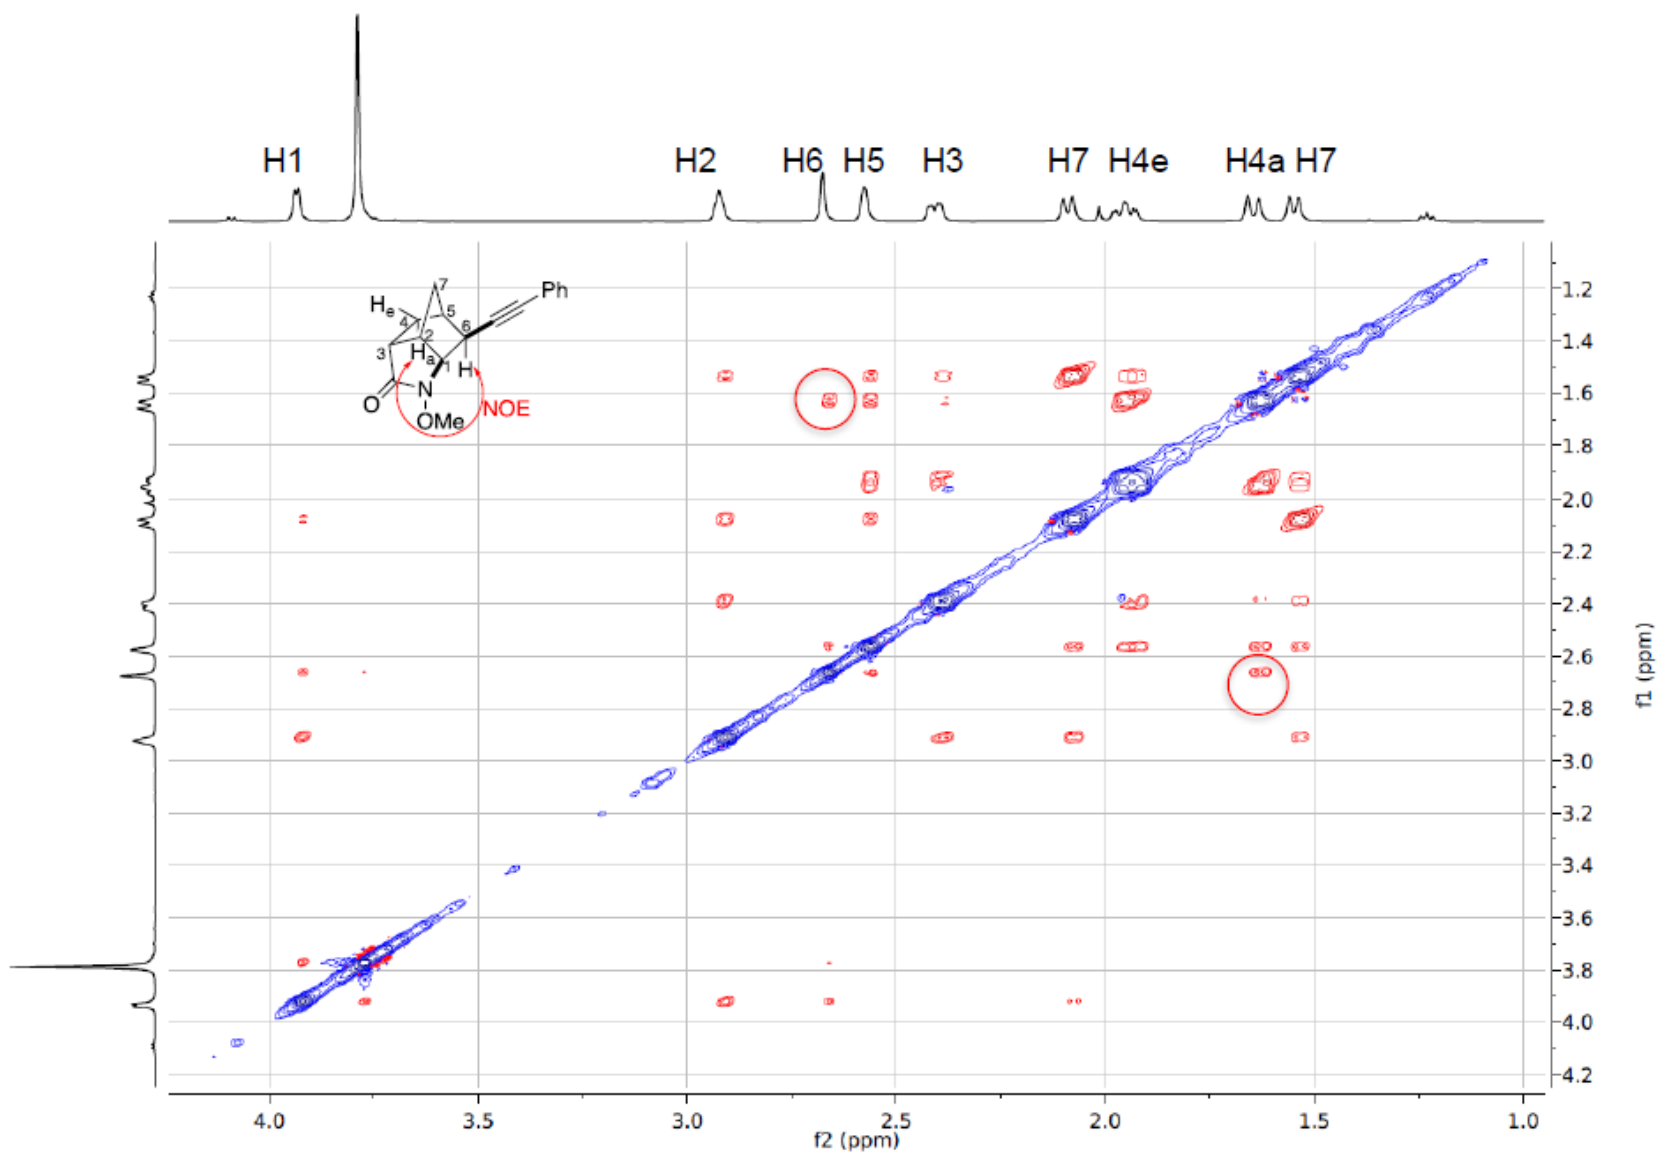

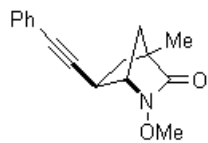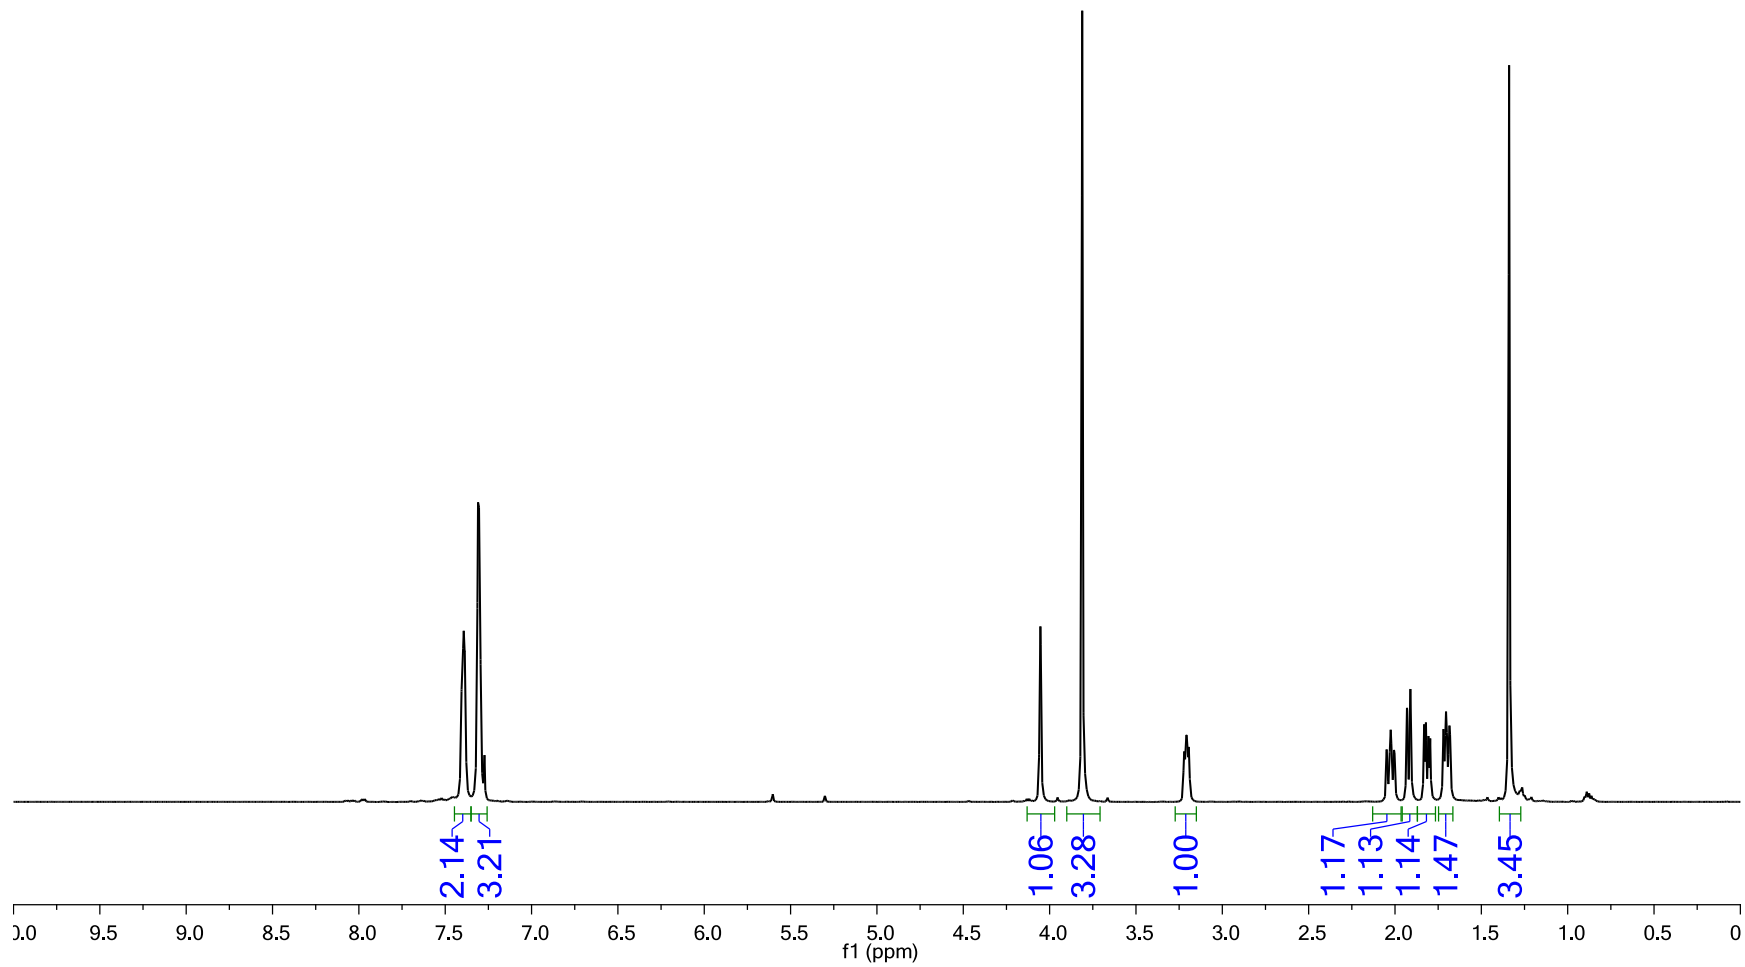

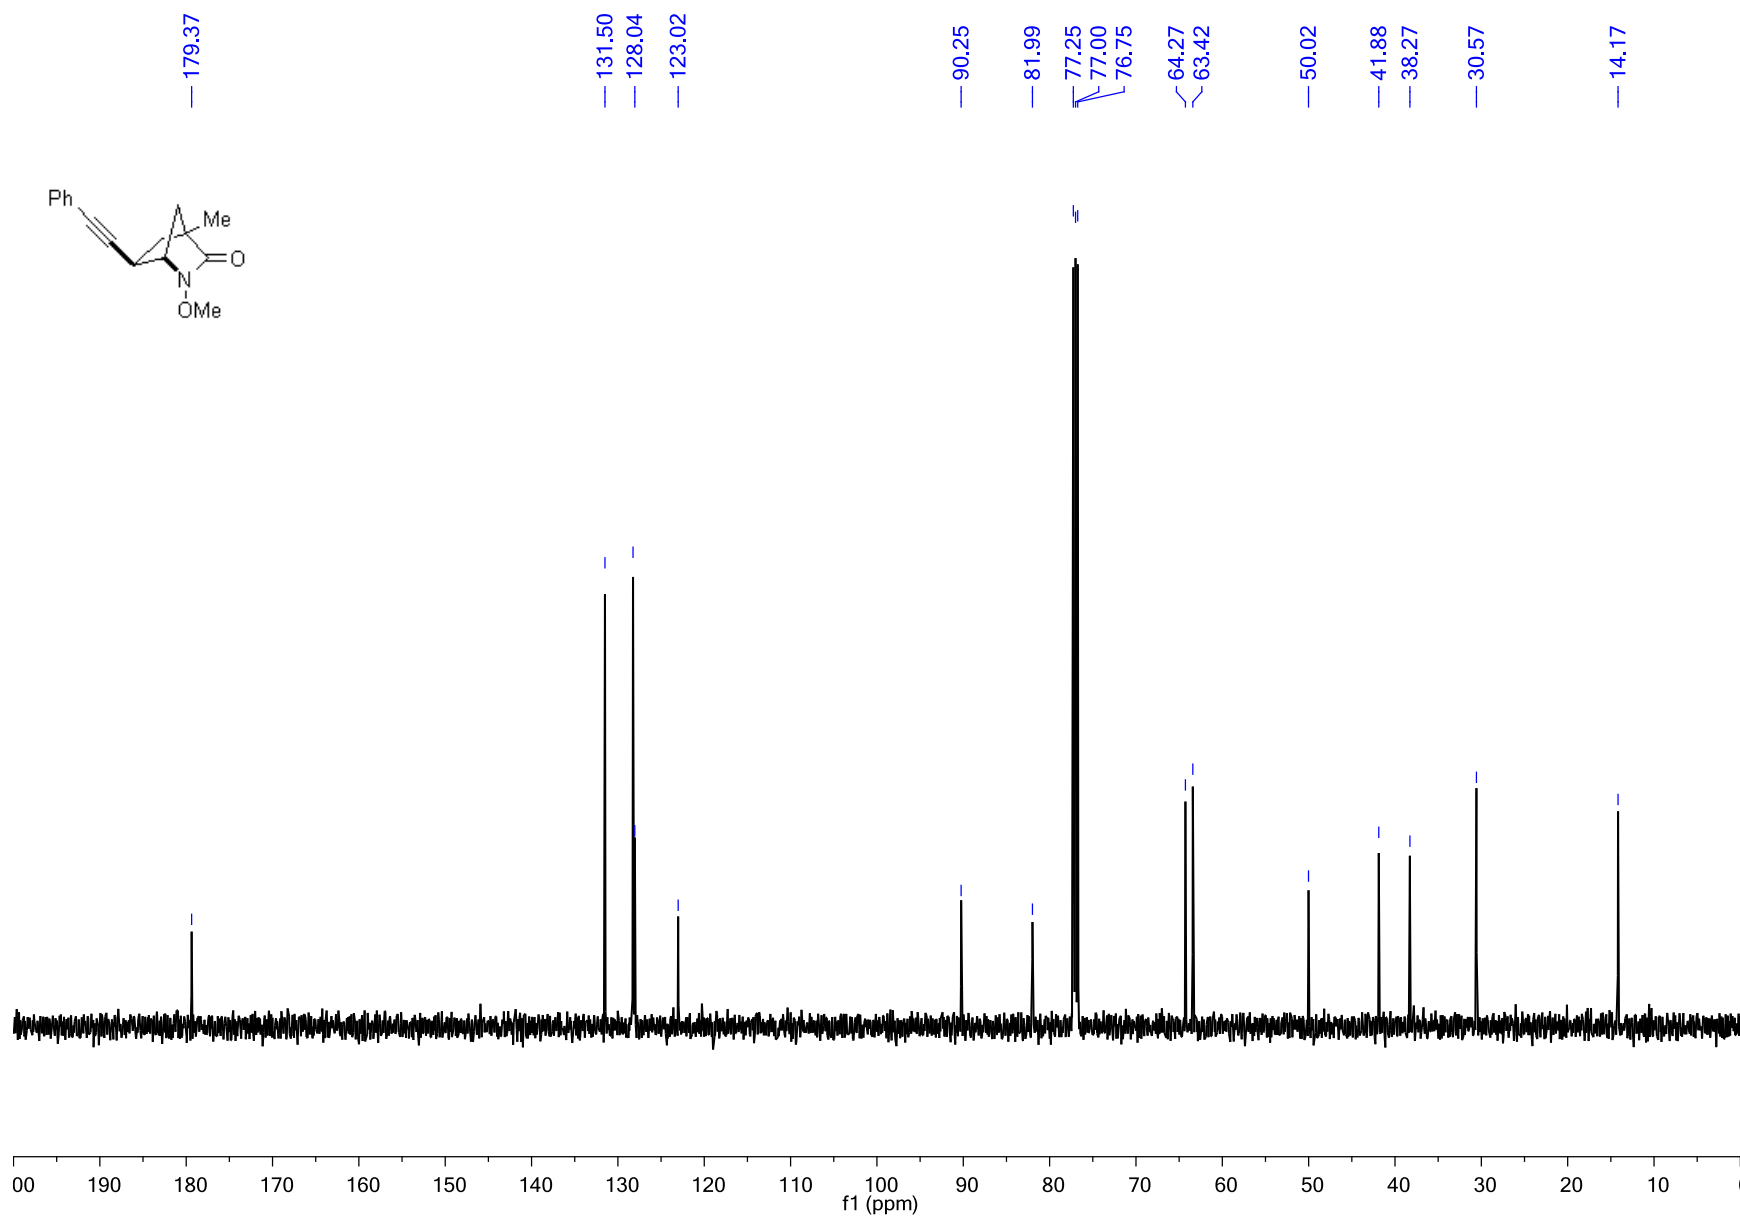



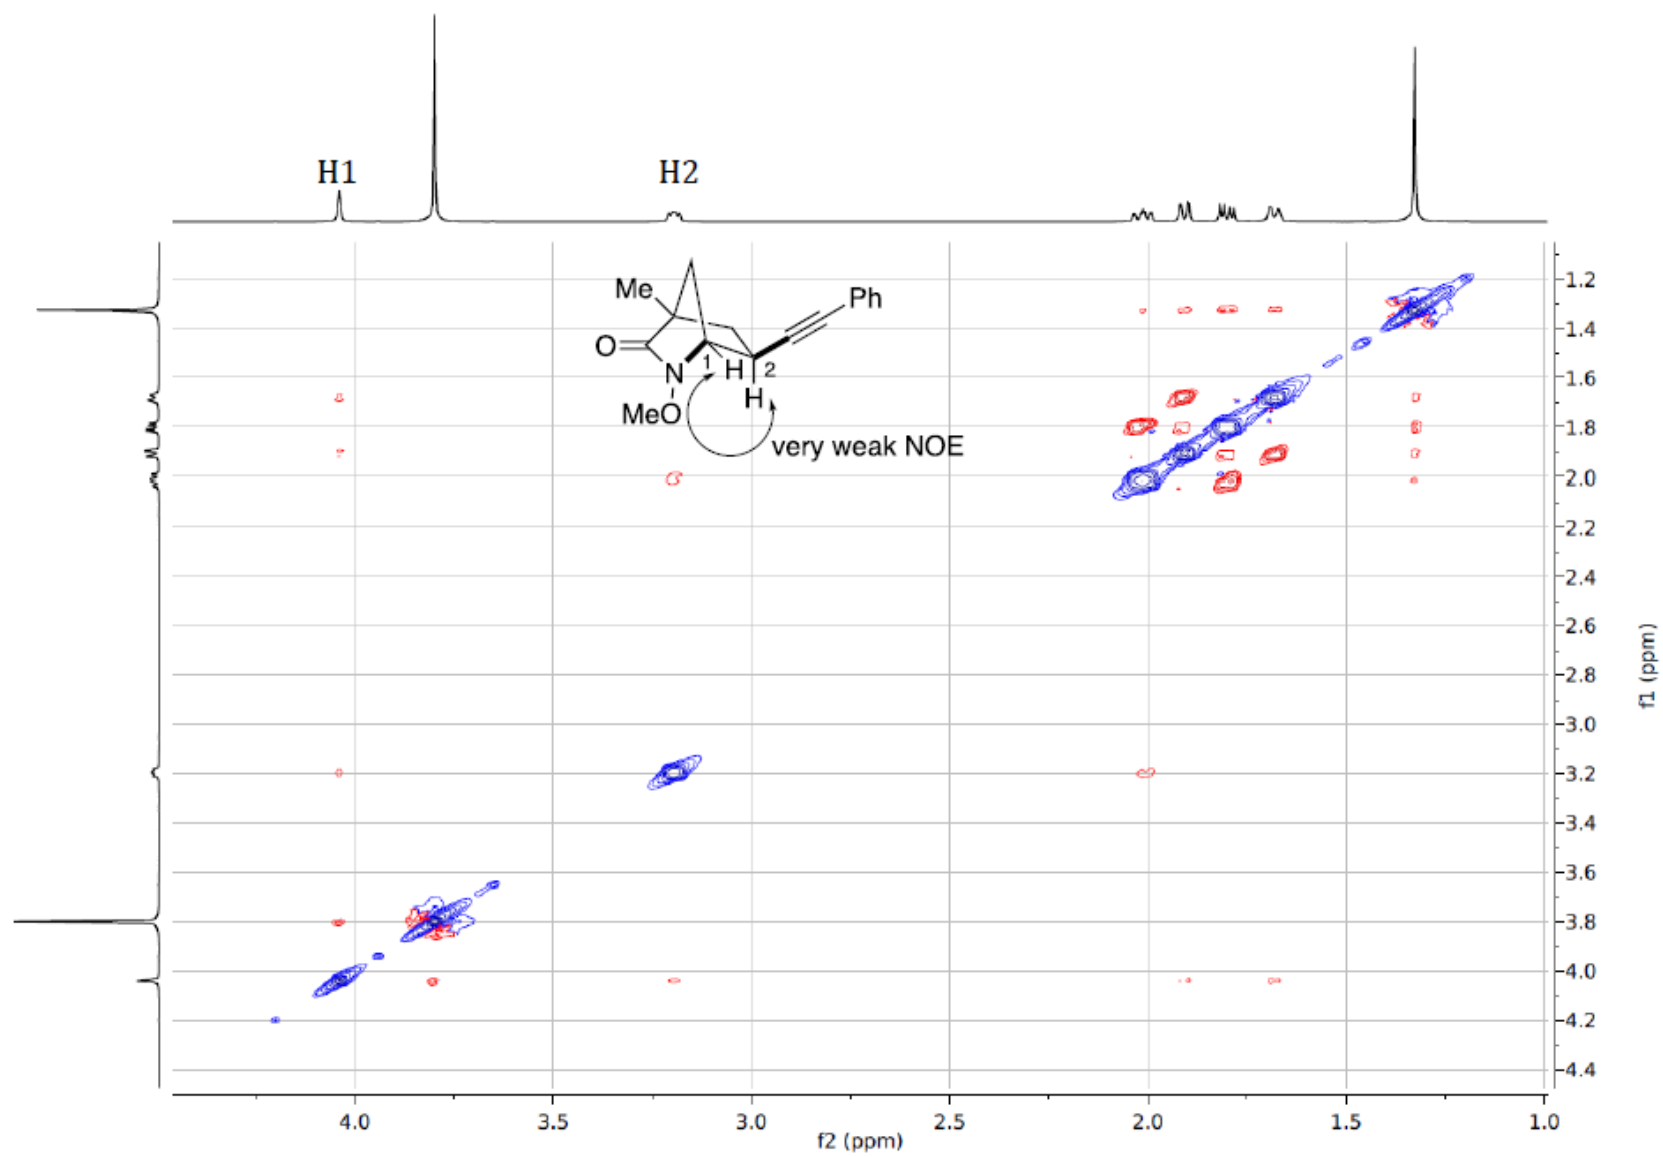

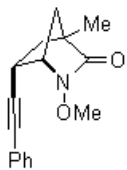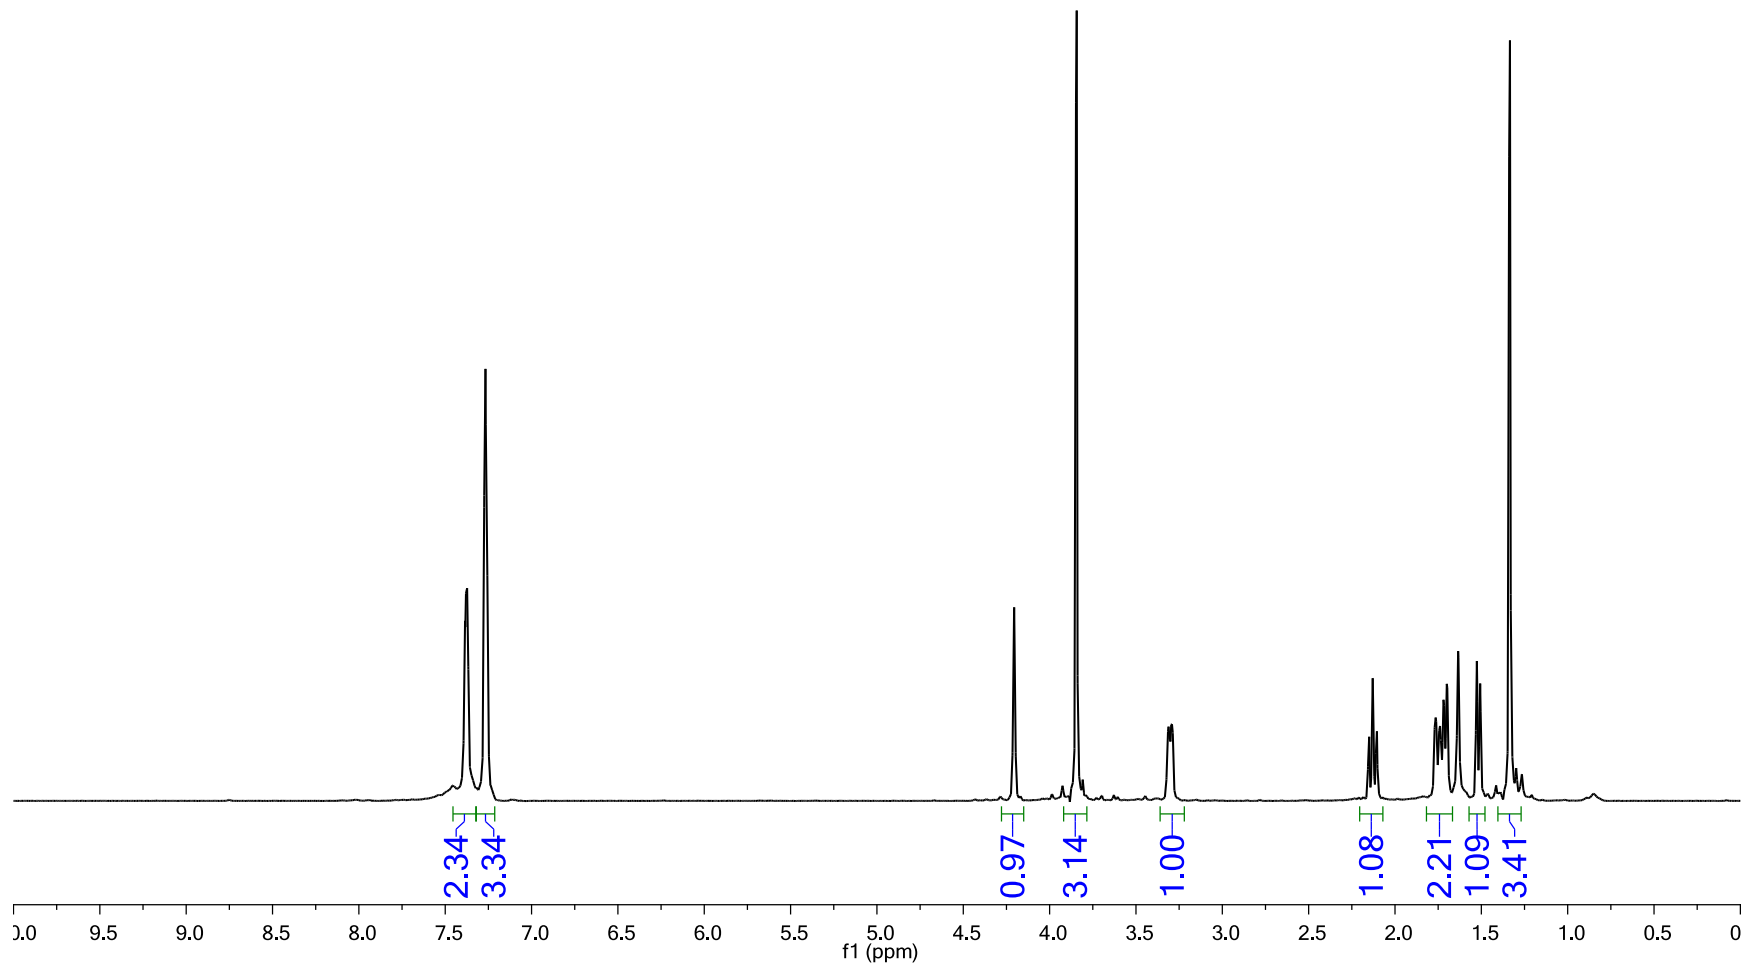

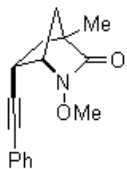

— 175.64

— 131.58

— 127.77

— 123.43

— 89.24

— 82.48

77.25

77.00

76.75

63.60

62.91

— 50.08

— 42.85

— 40.43

— 33.78

— 14.77

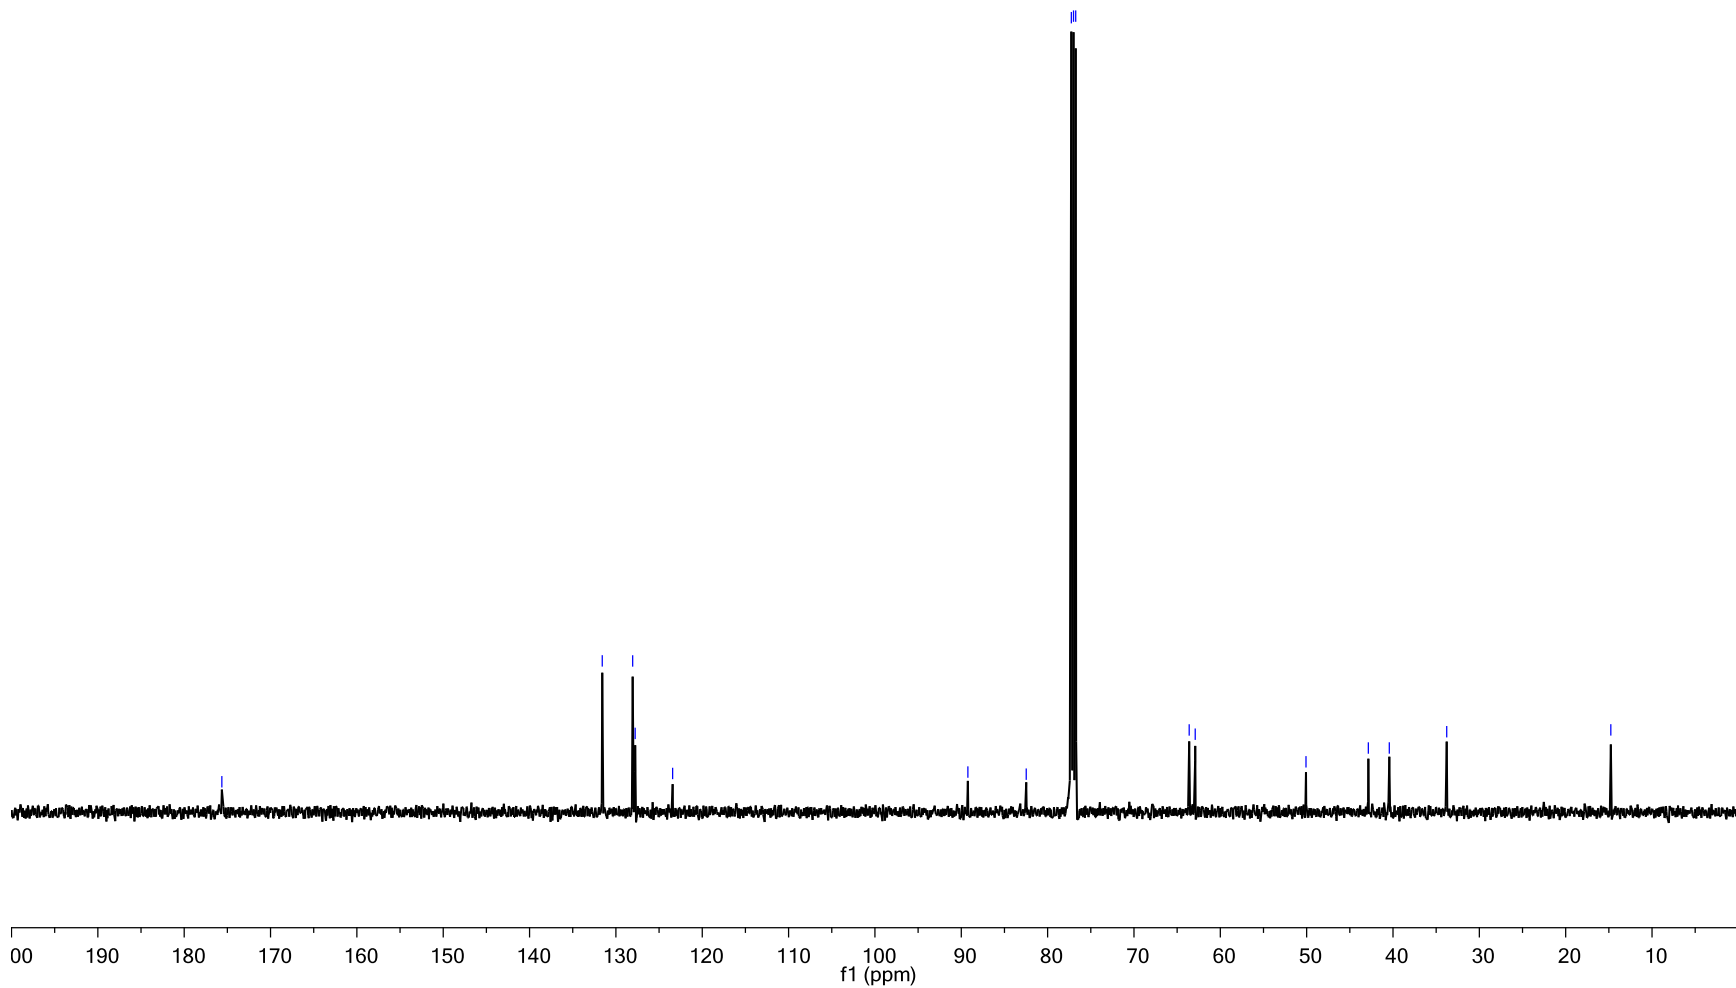

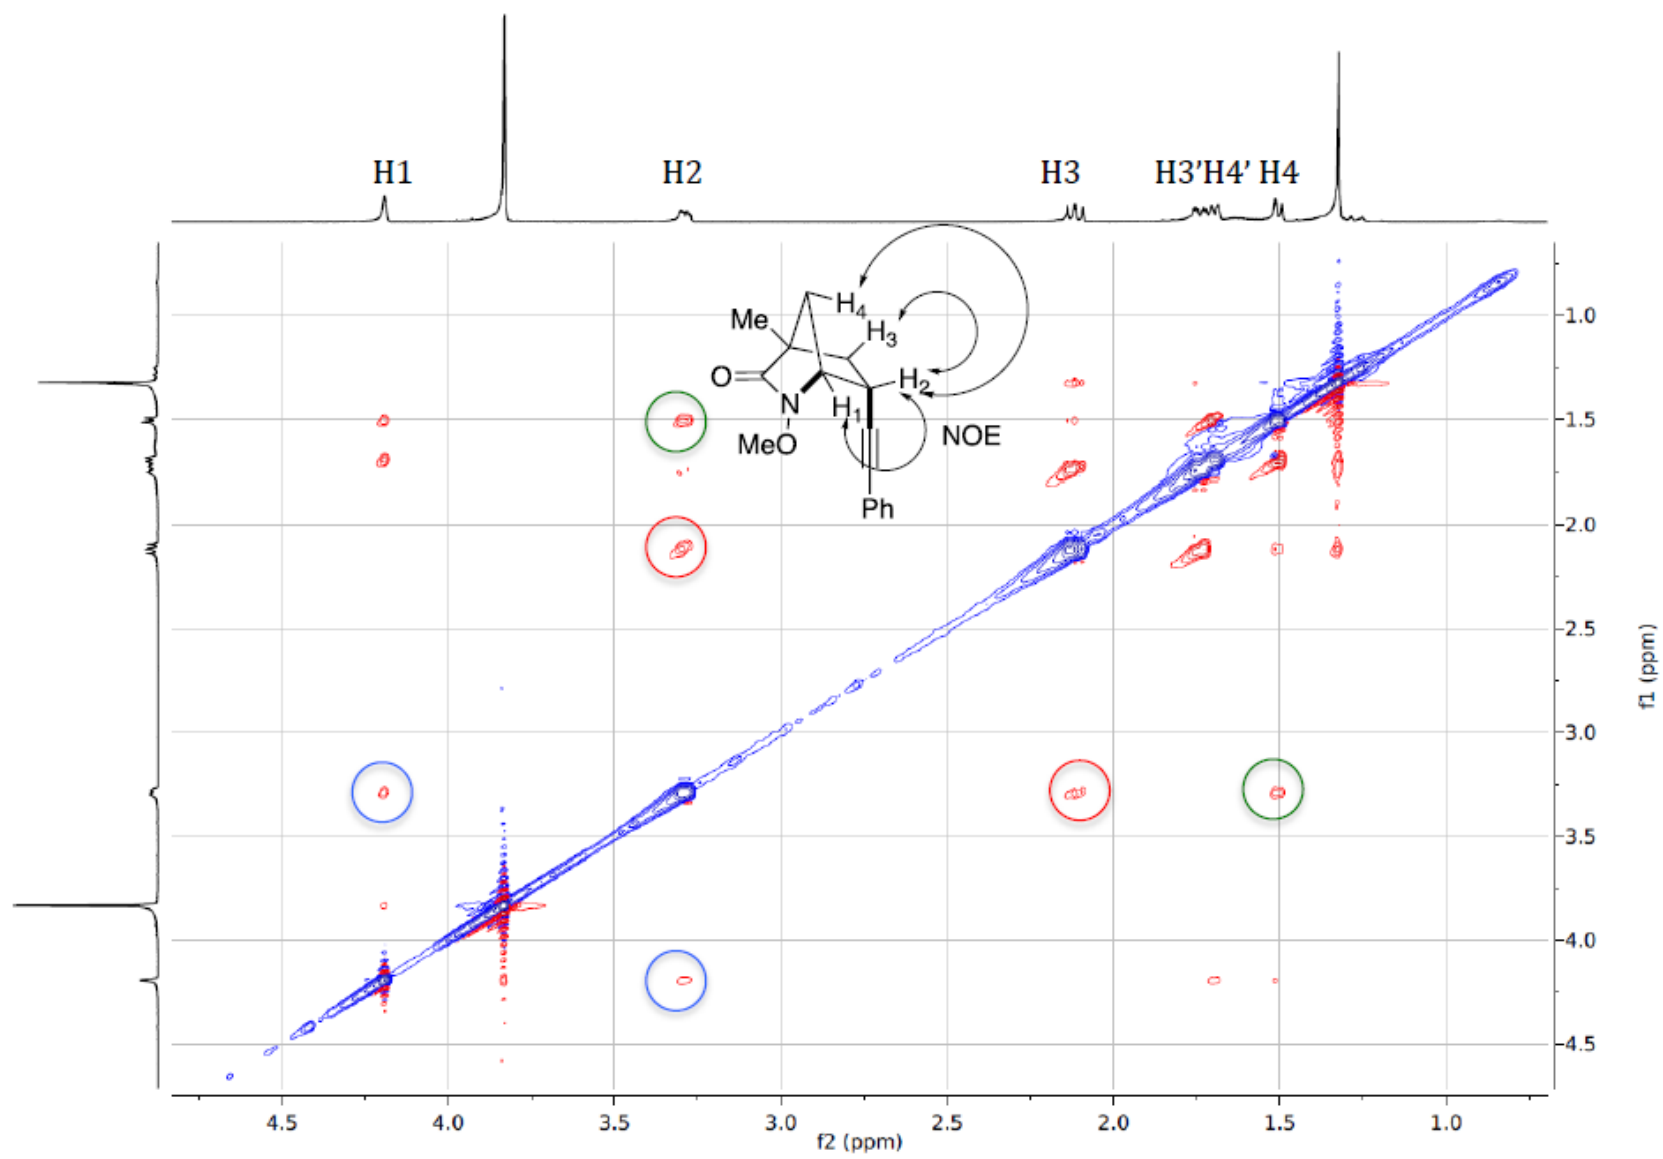

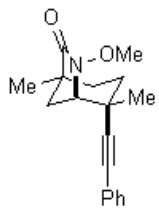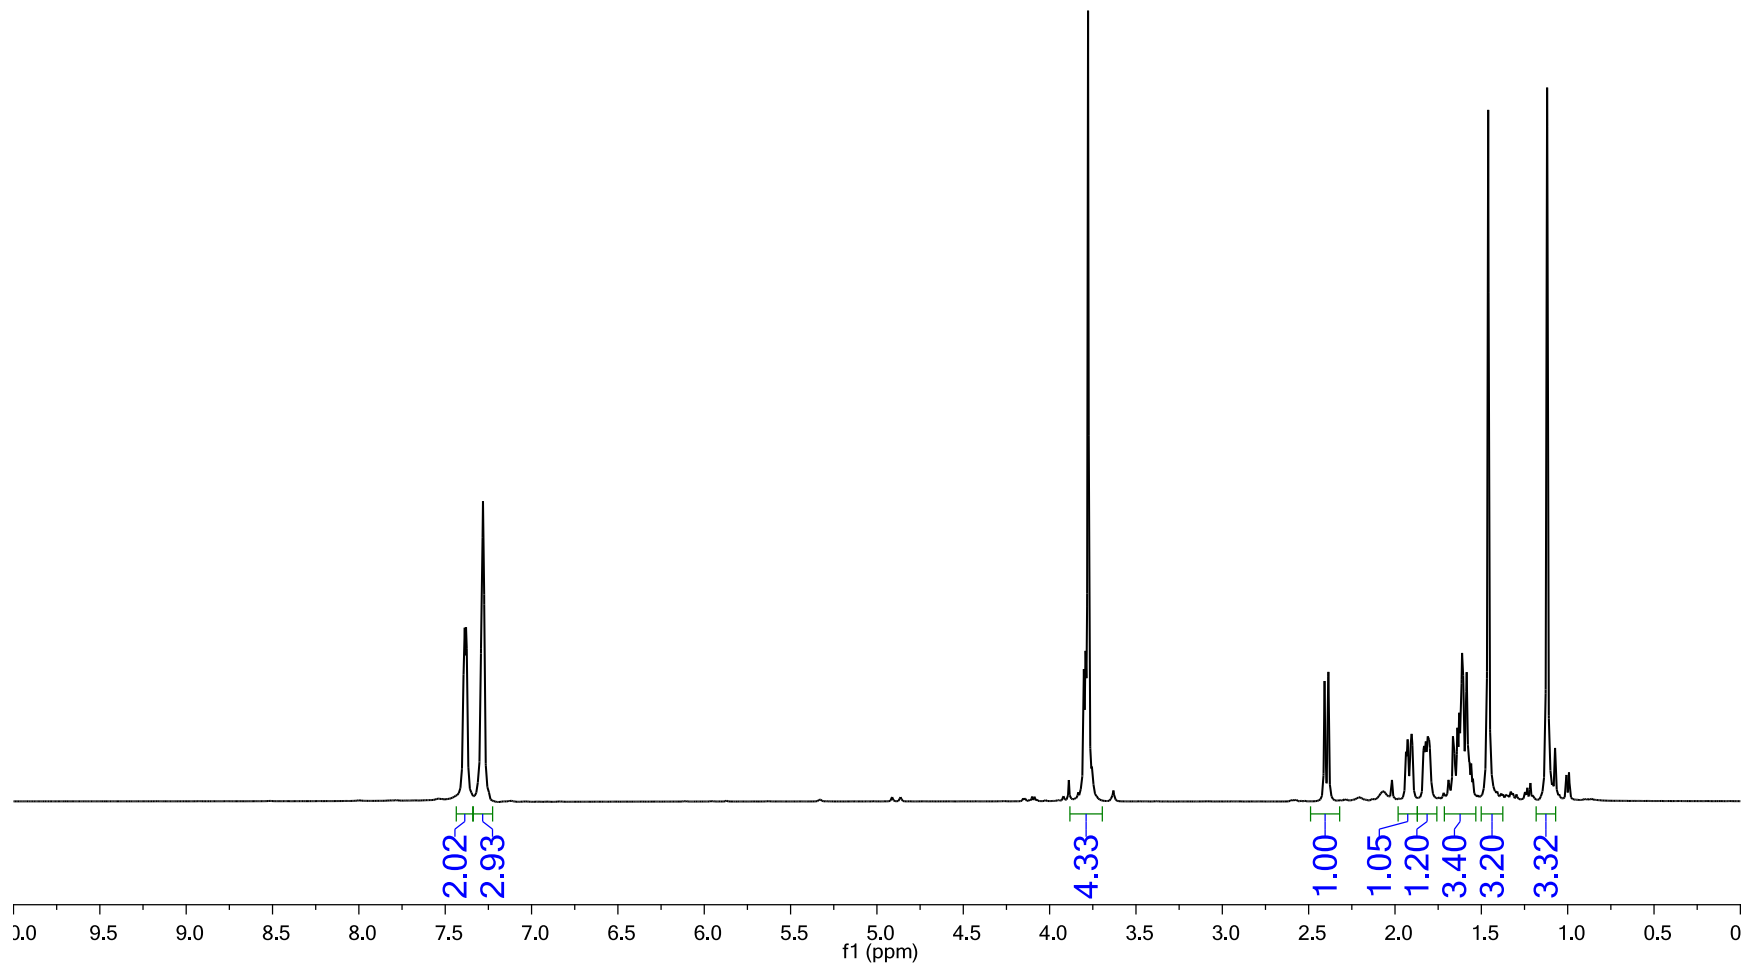

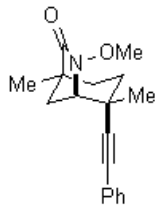

174.36

131.39

127.88

123.09

93.92

82.77

77.25

77.00

76.74

62.69

61.28

40.84

38.84

31.88

27.12

20.18

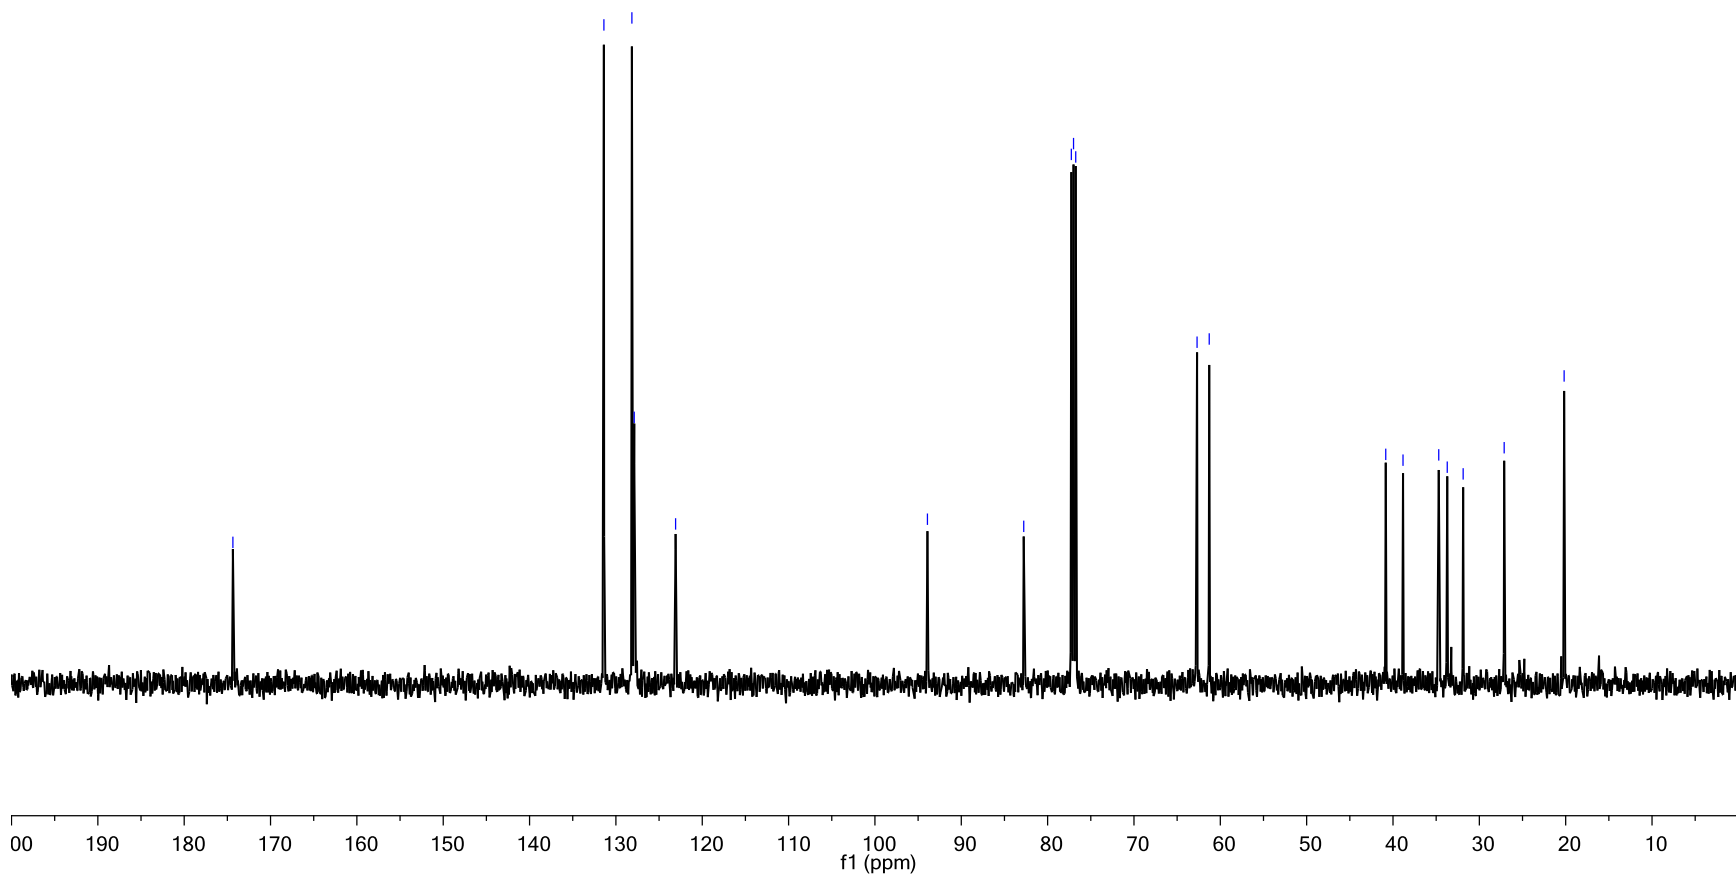

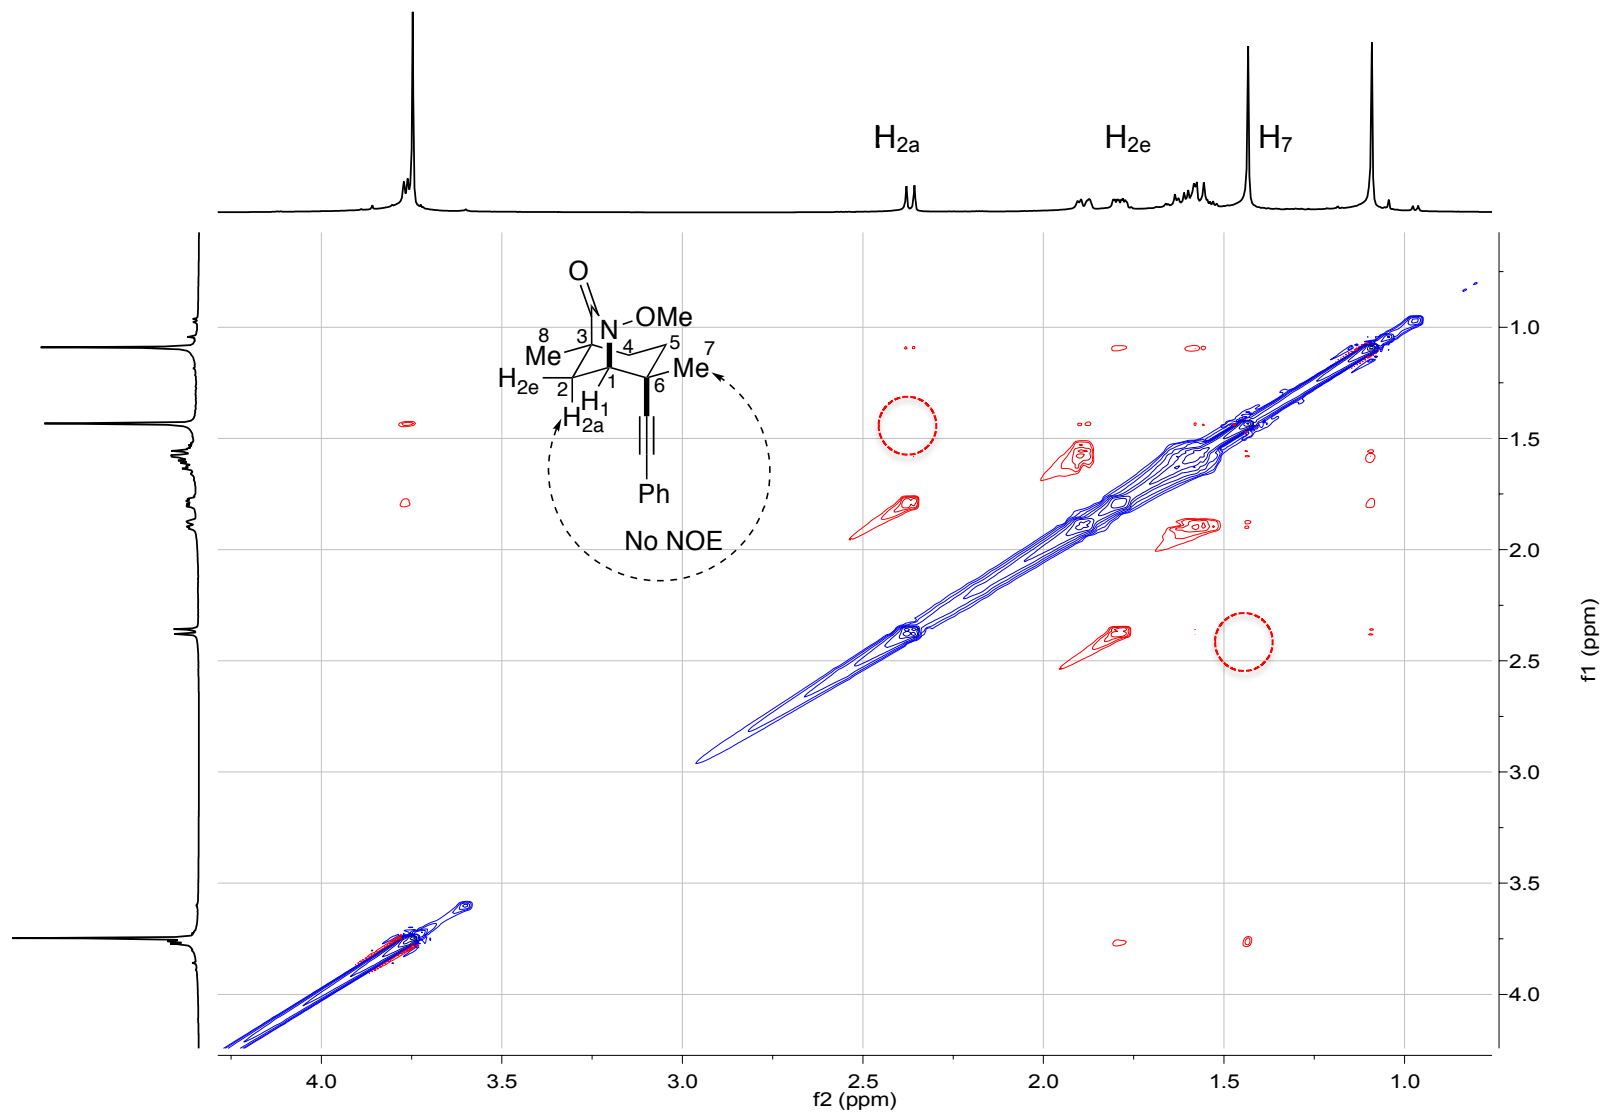

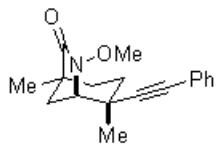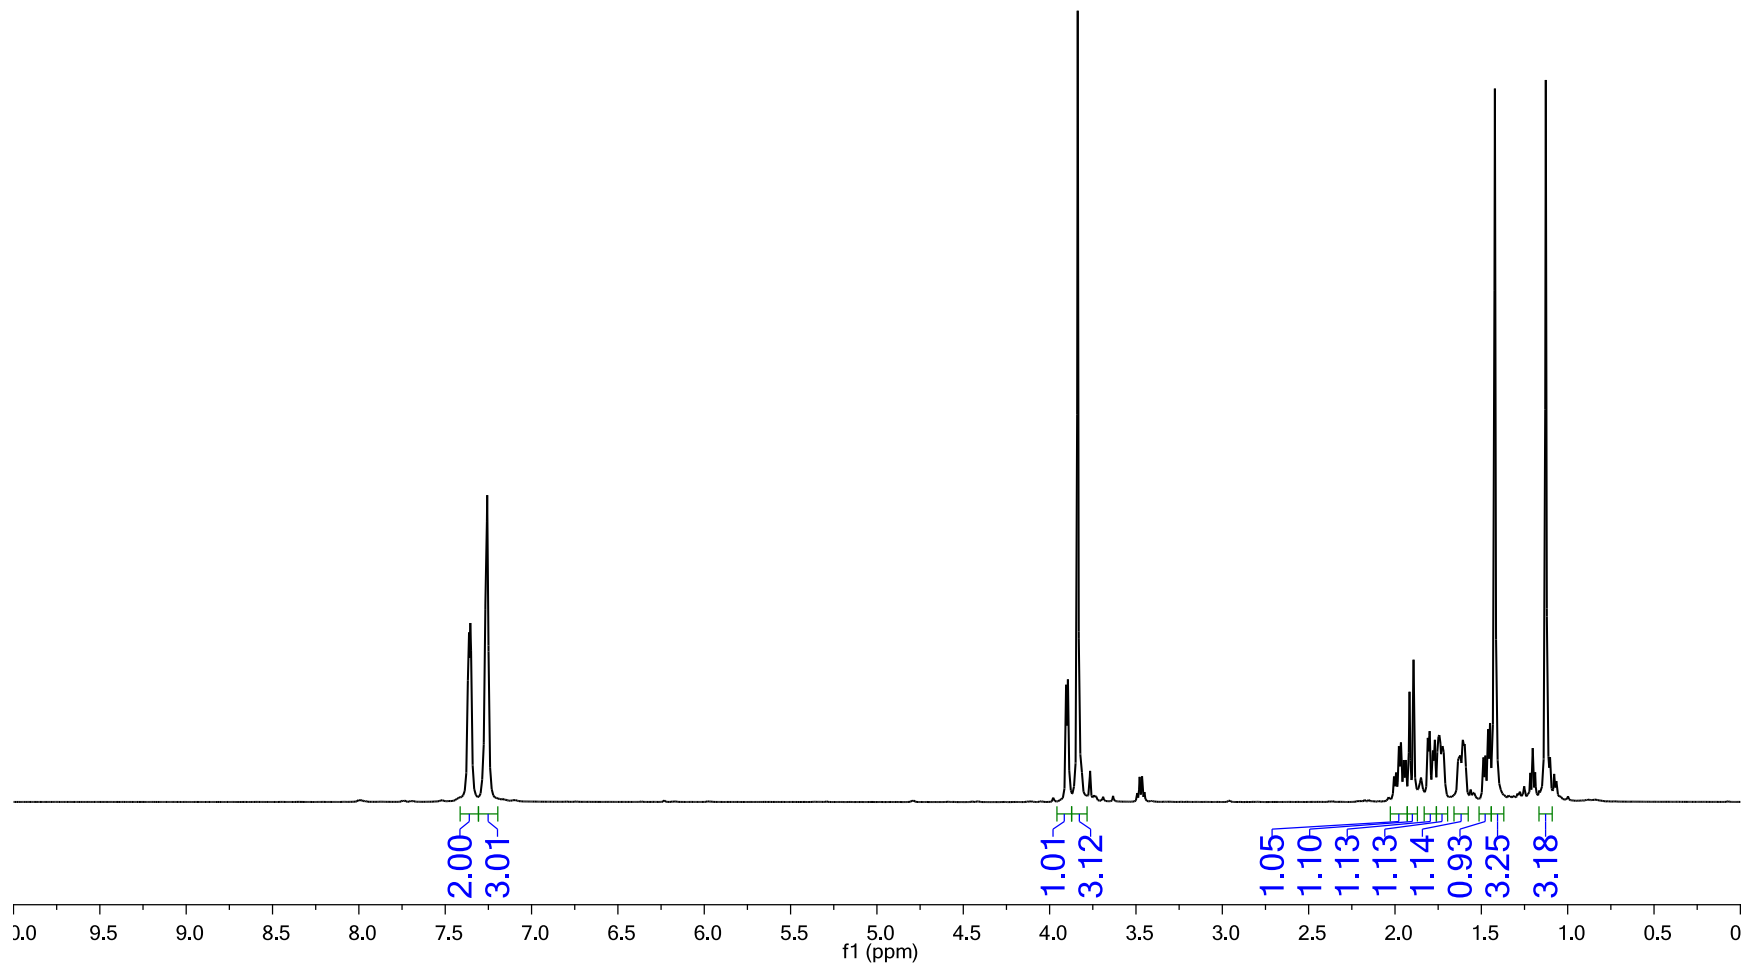



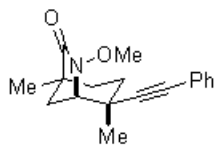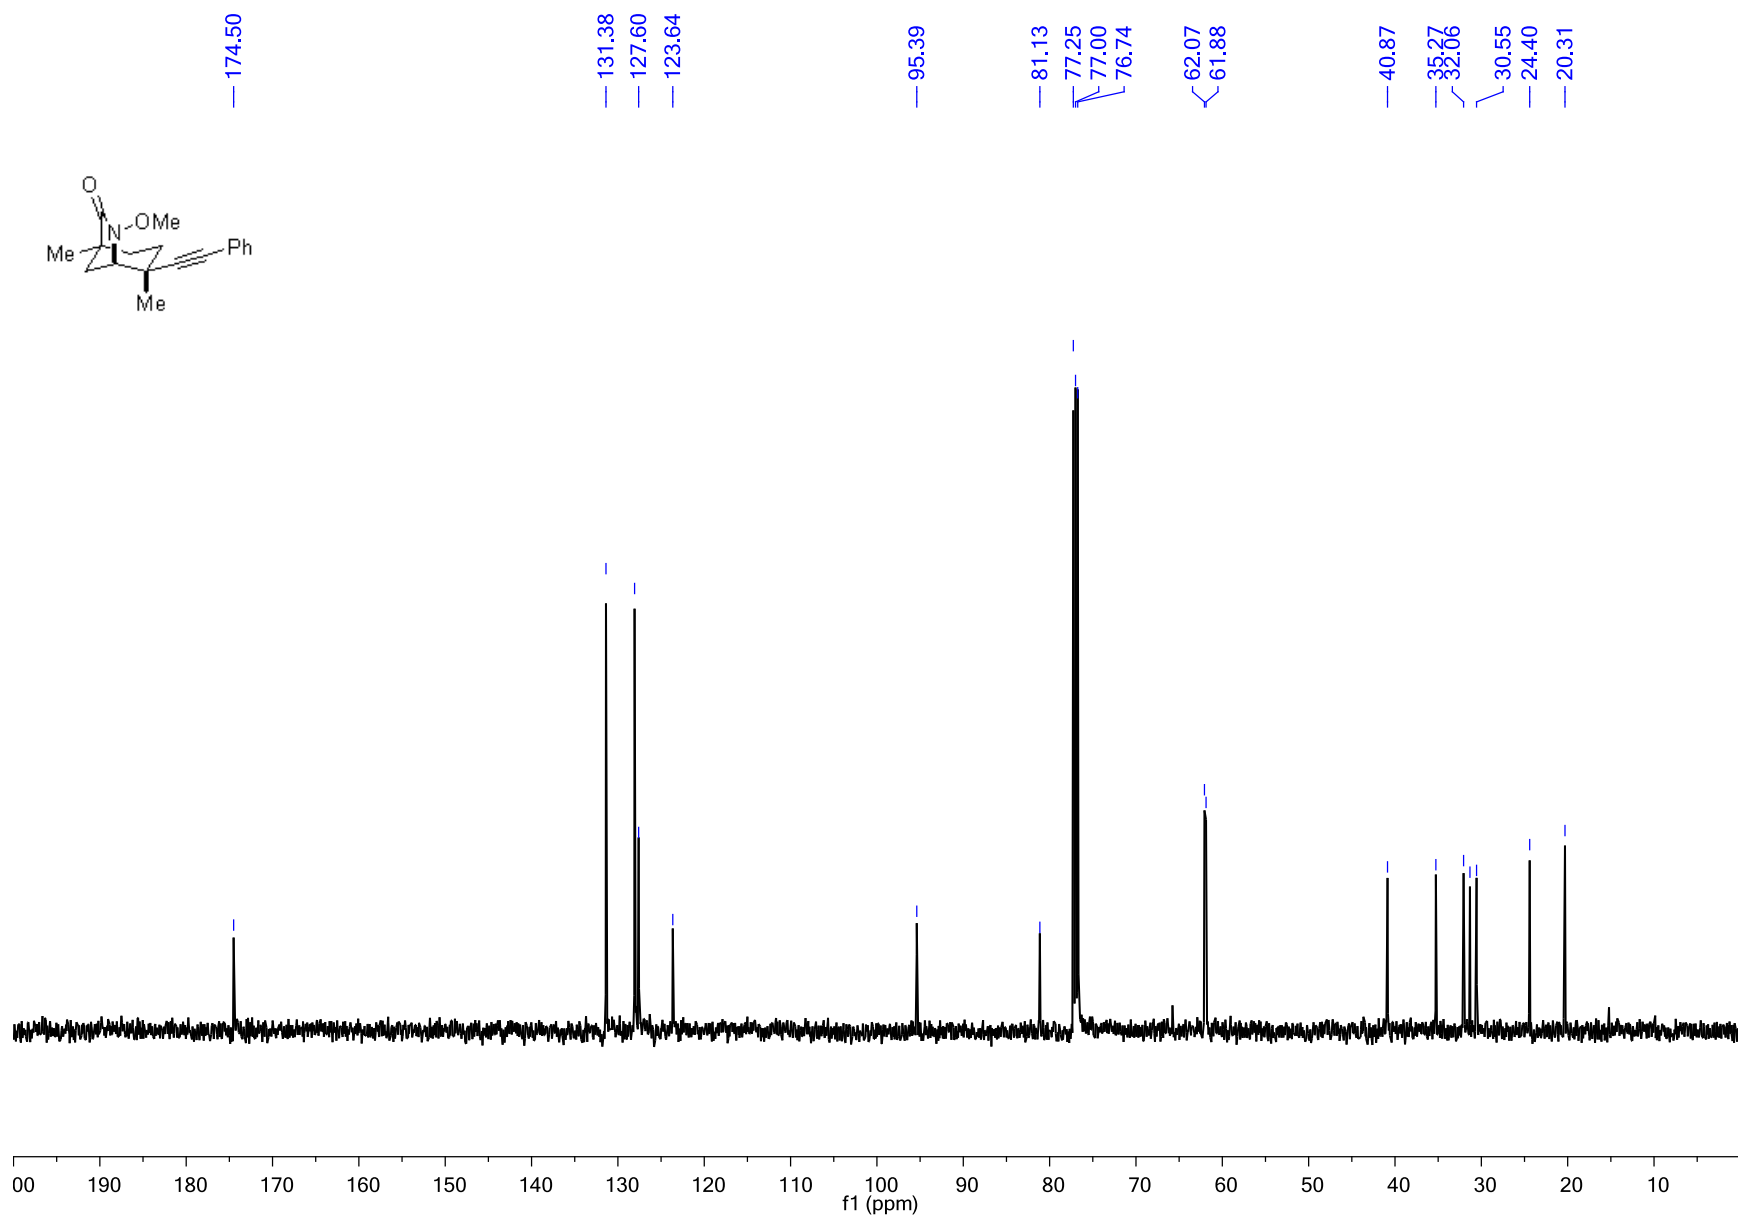

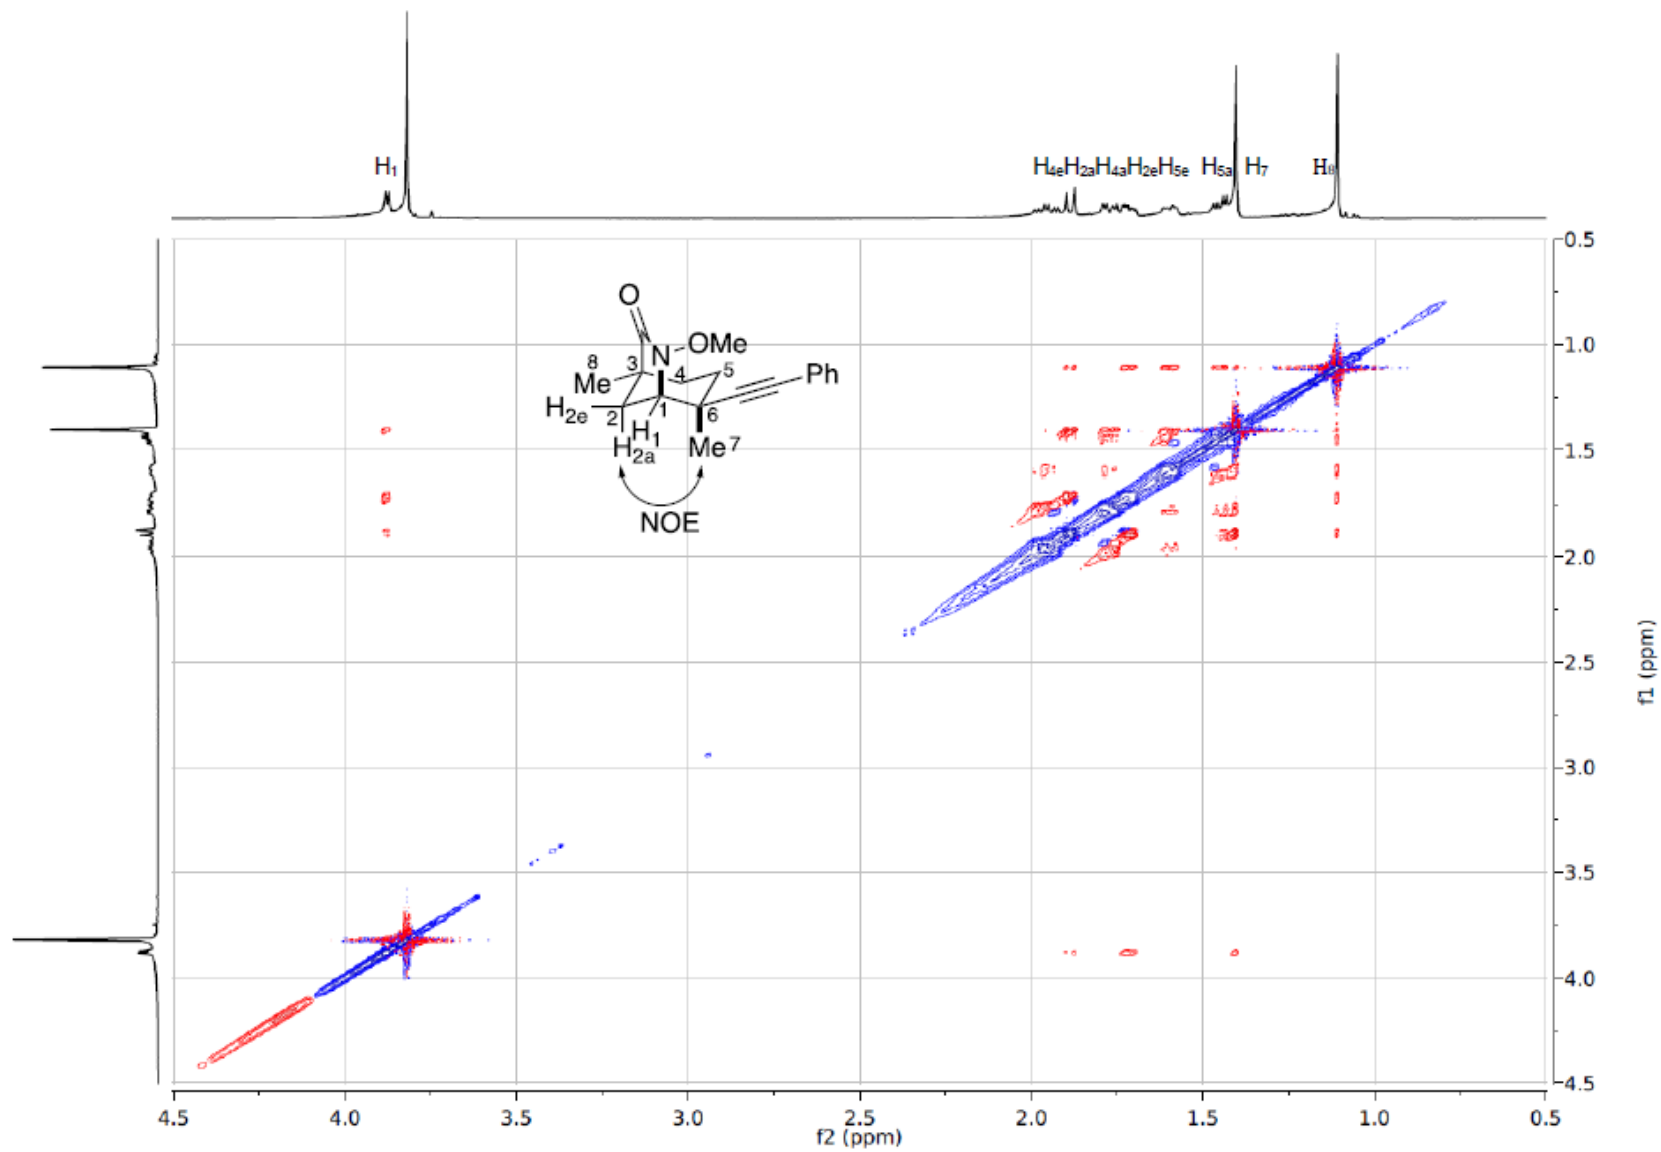

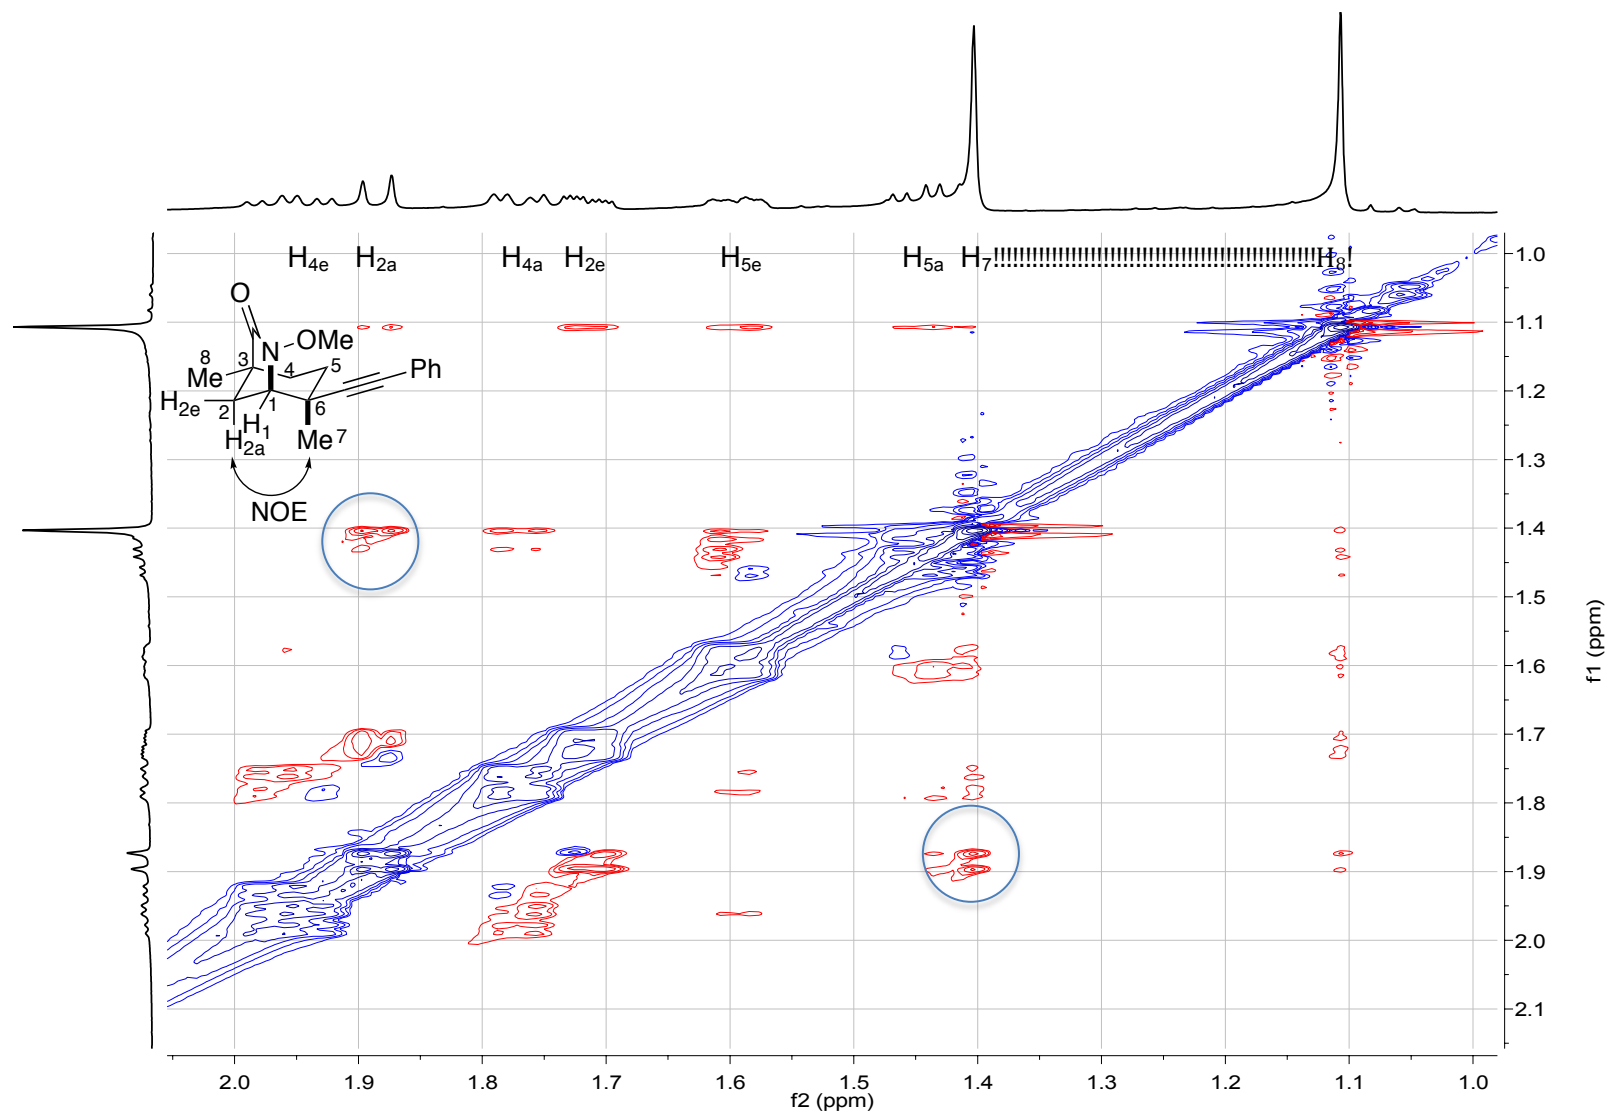

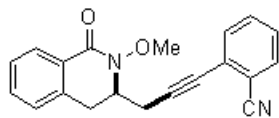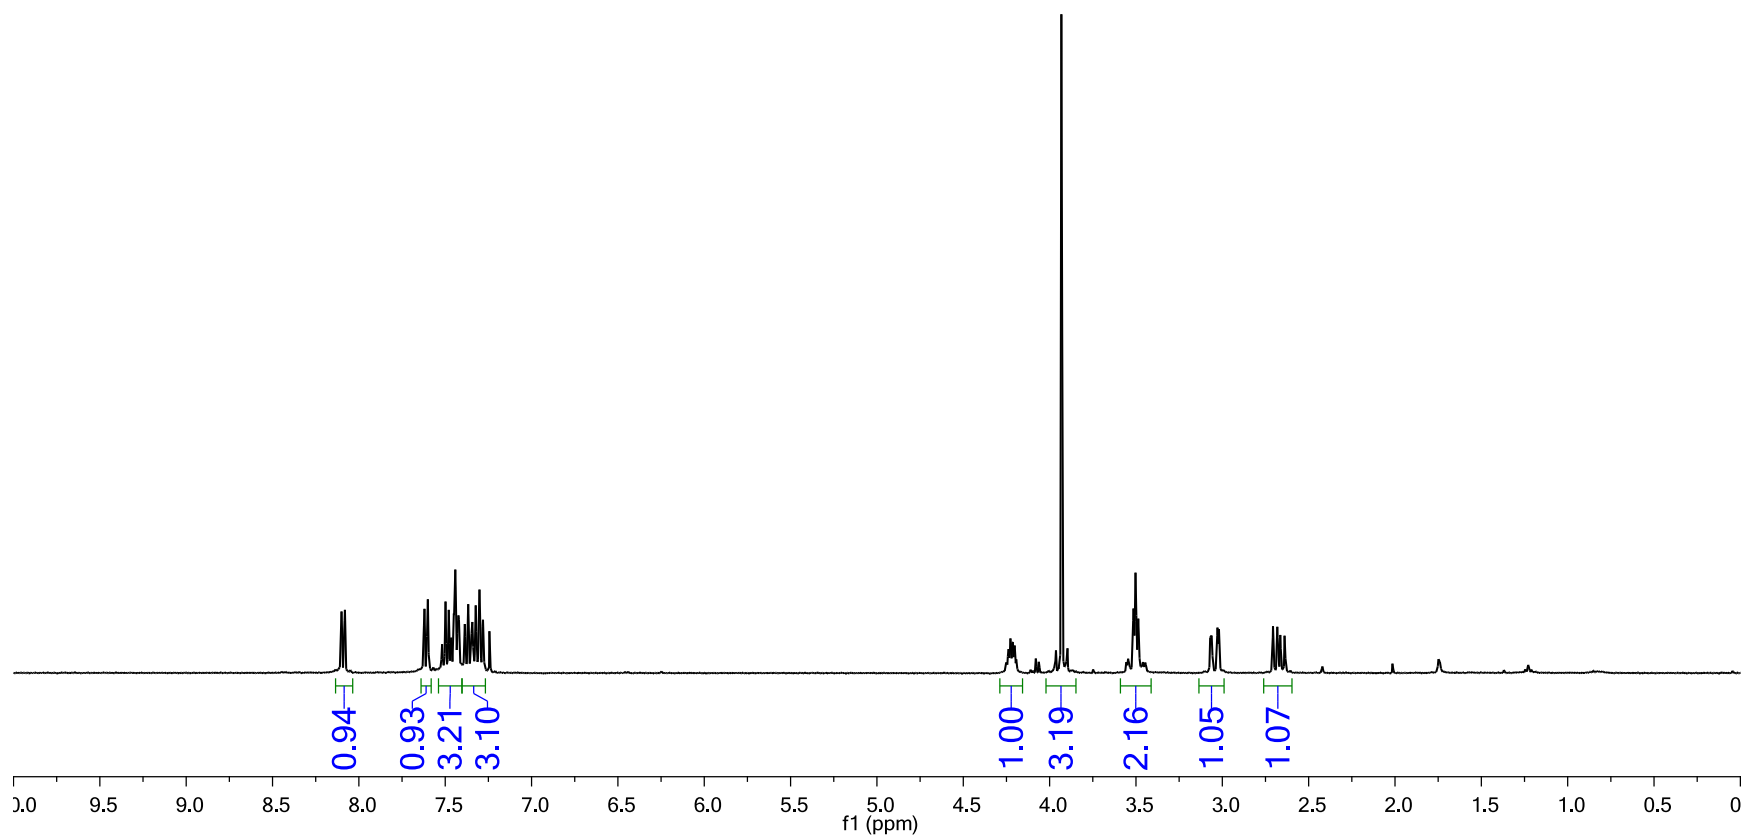

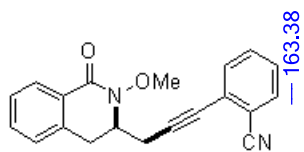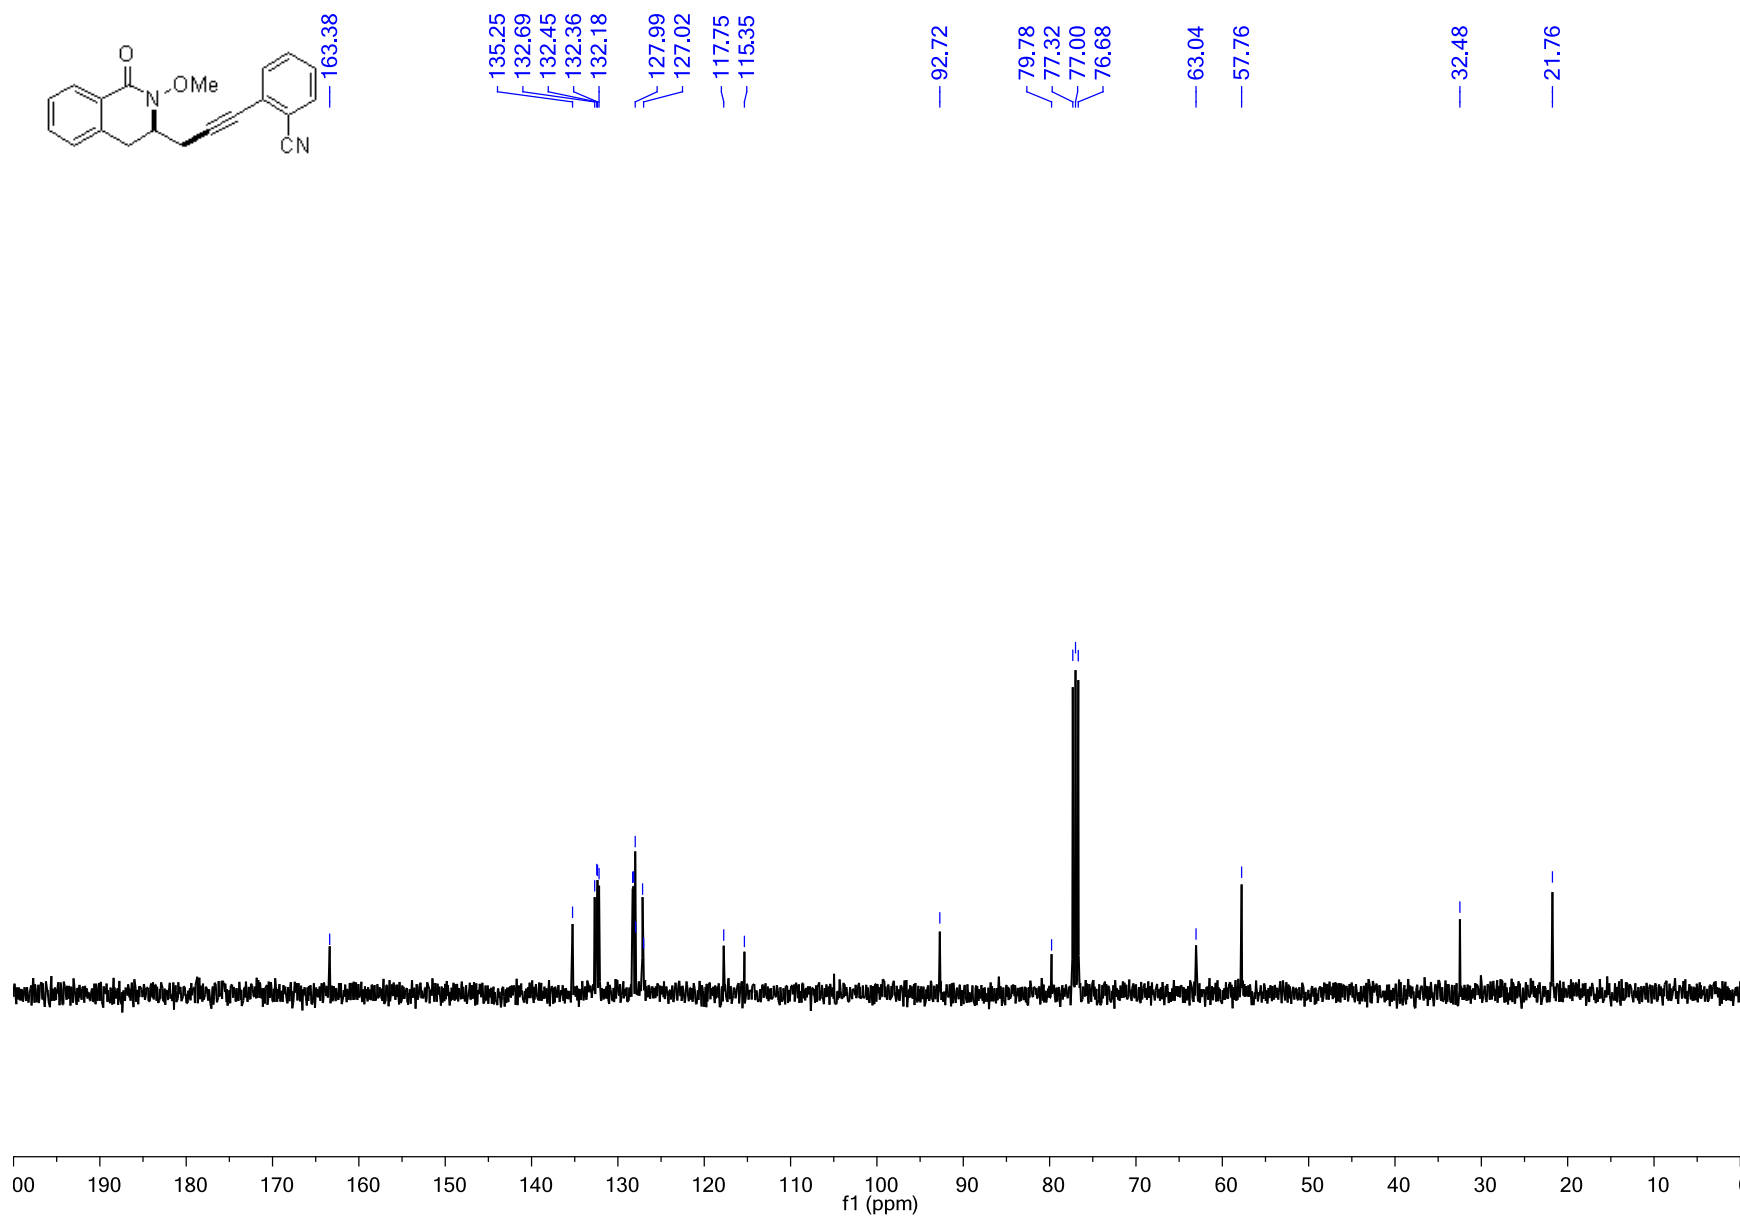

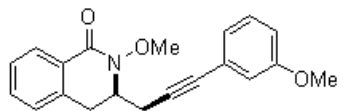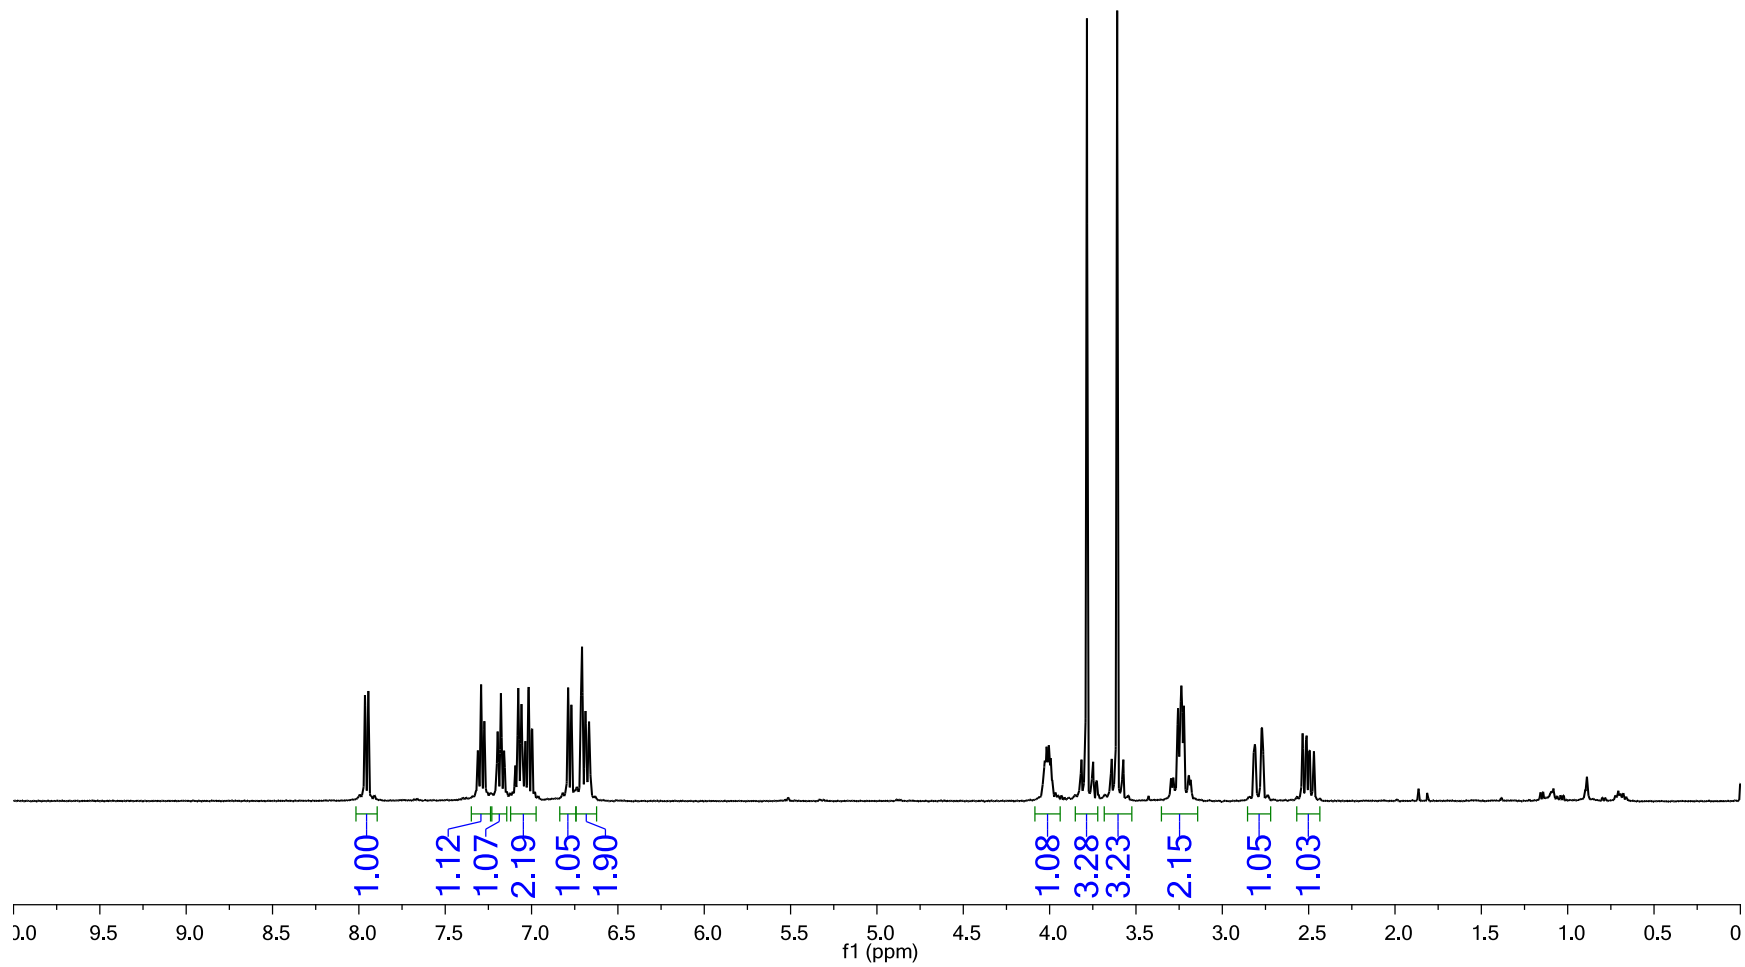

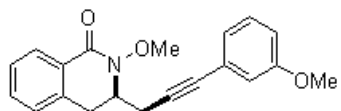

— 163.39  
— 159.16

— 135.29  
— 132.51  
— 127.10  
— 124.00  
— 116.45  
— 114.42

— 85.17  
— 83.36  
— 77.32  
— 77.00  
— 76.68

— 63.03  
— 57.90  
— 55.14

— 32.69

— 21.82

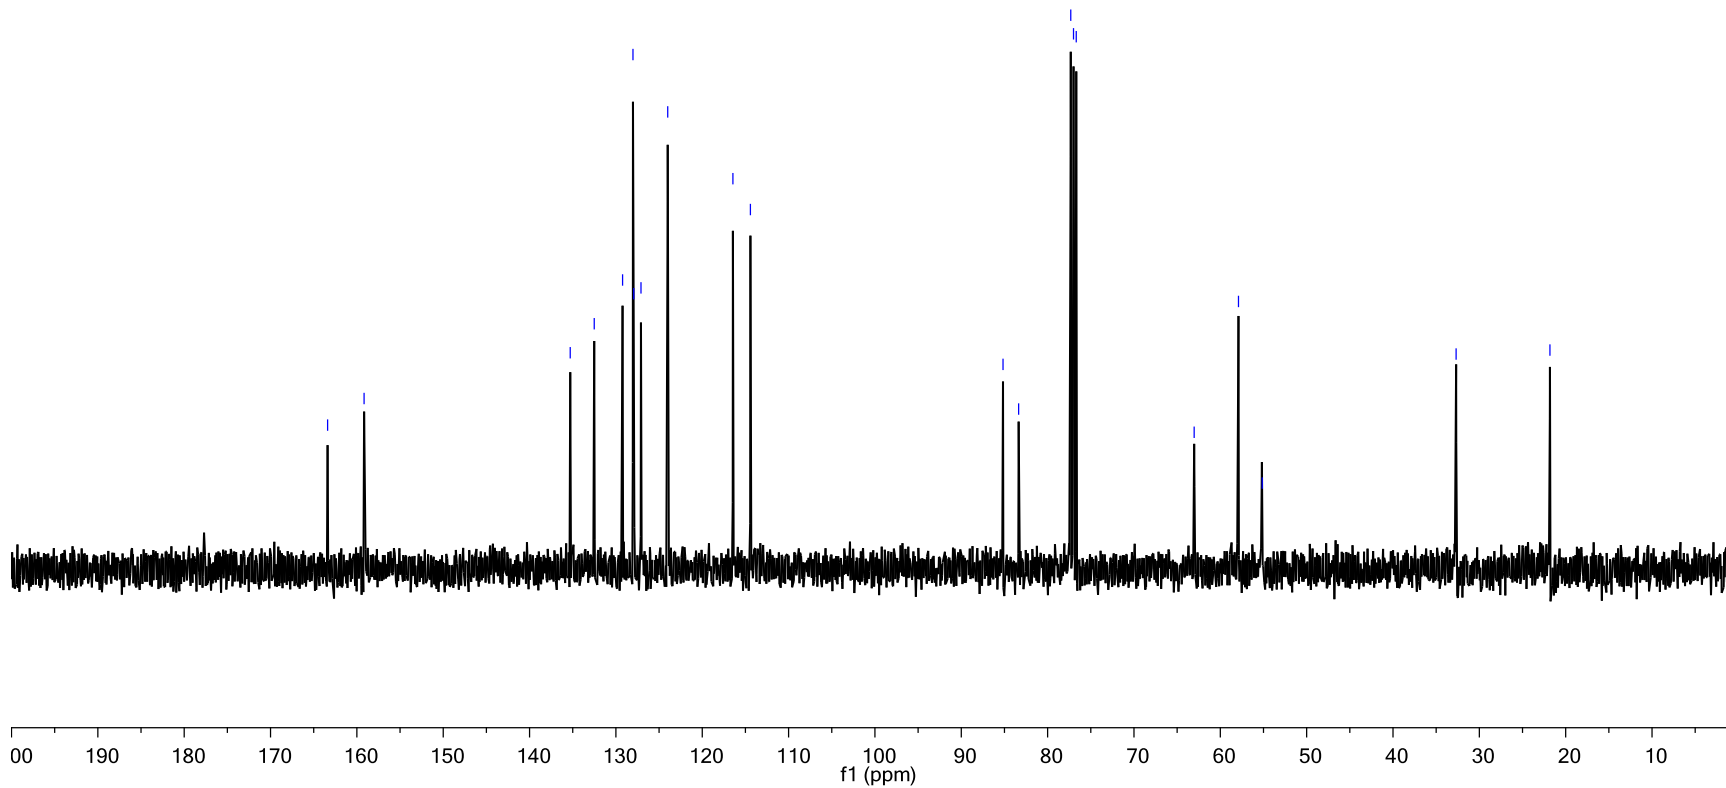

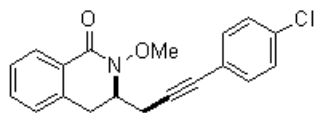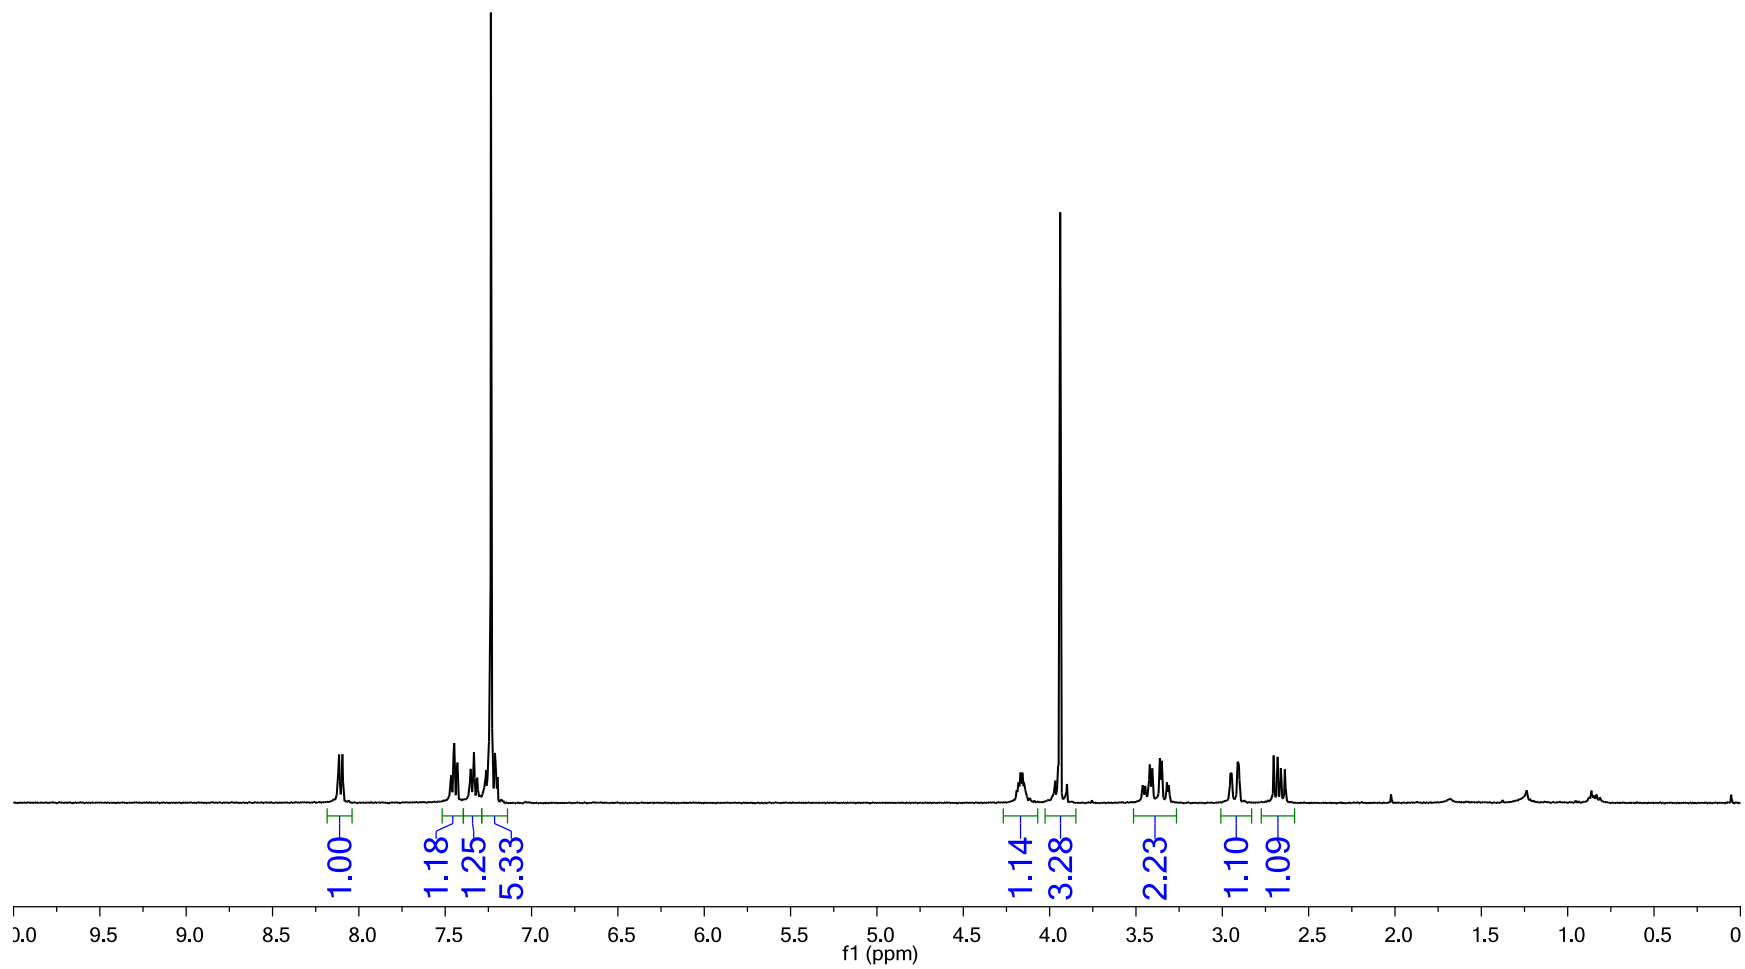



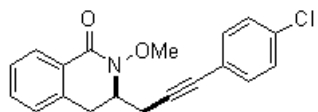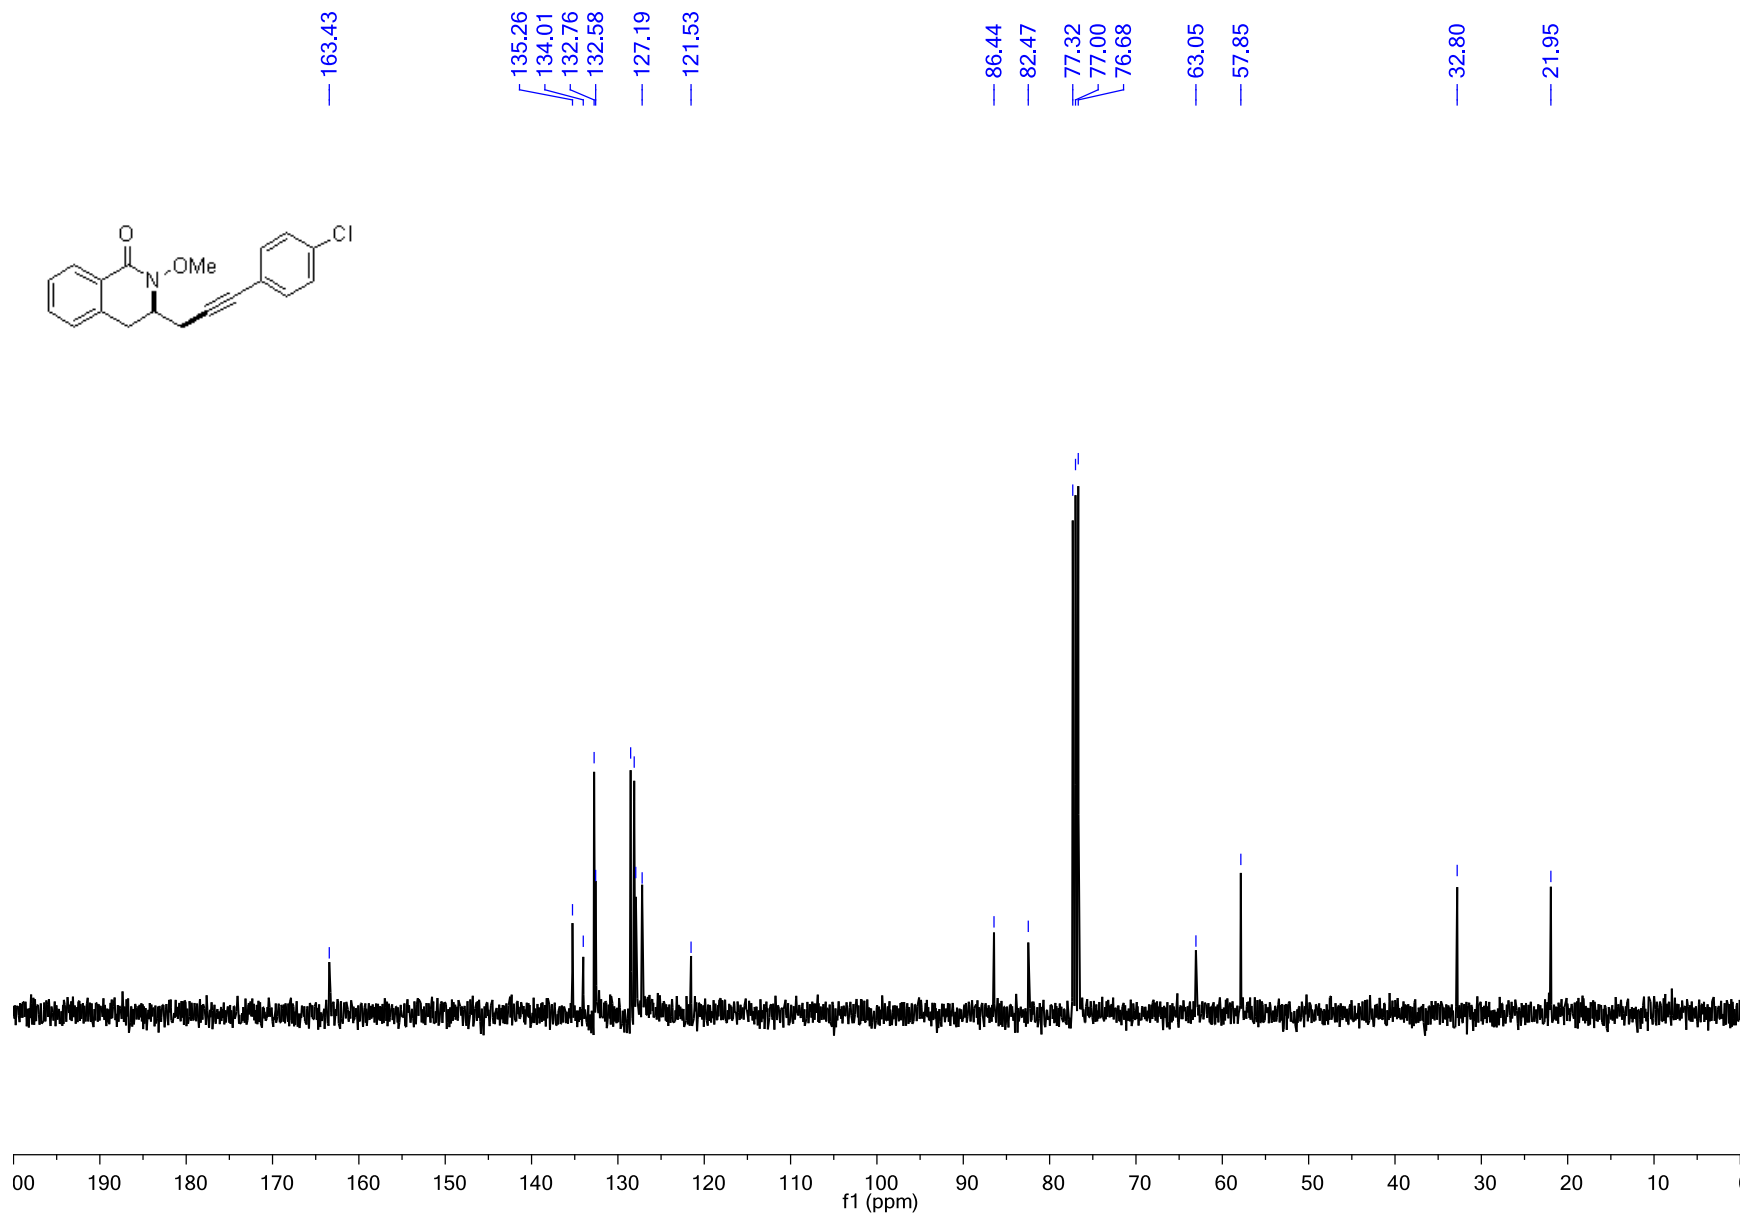

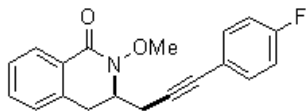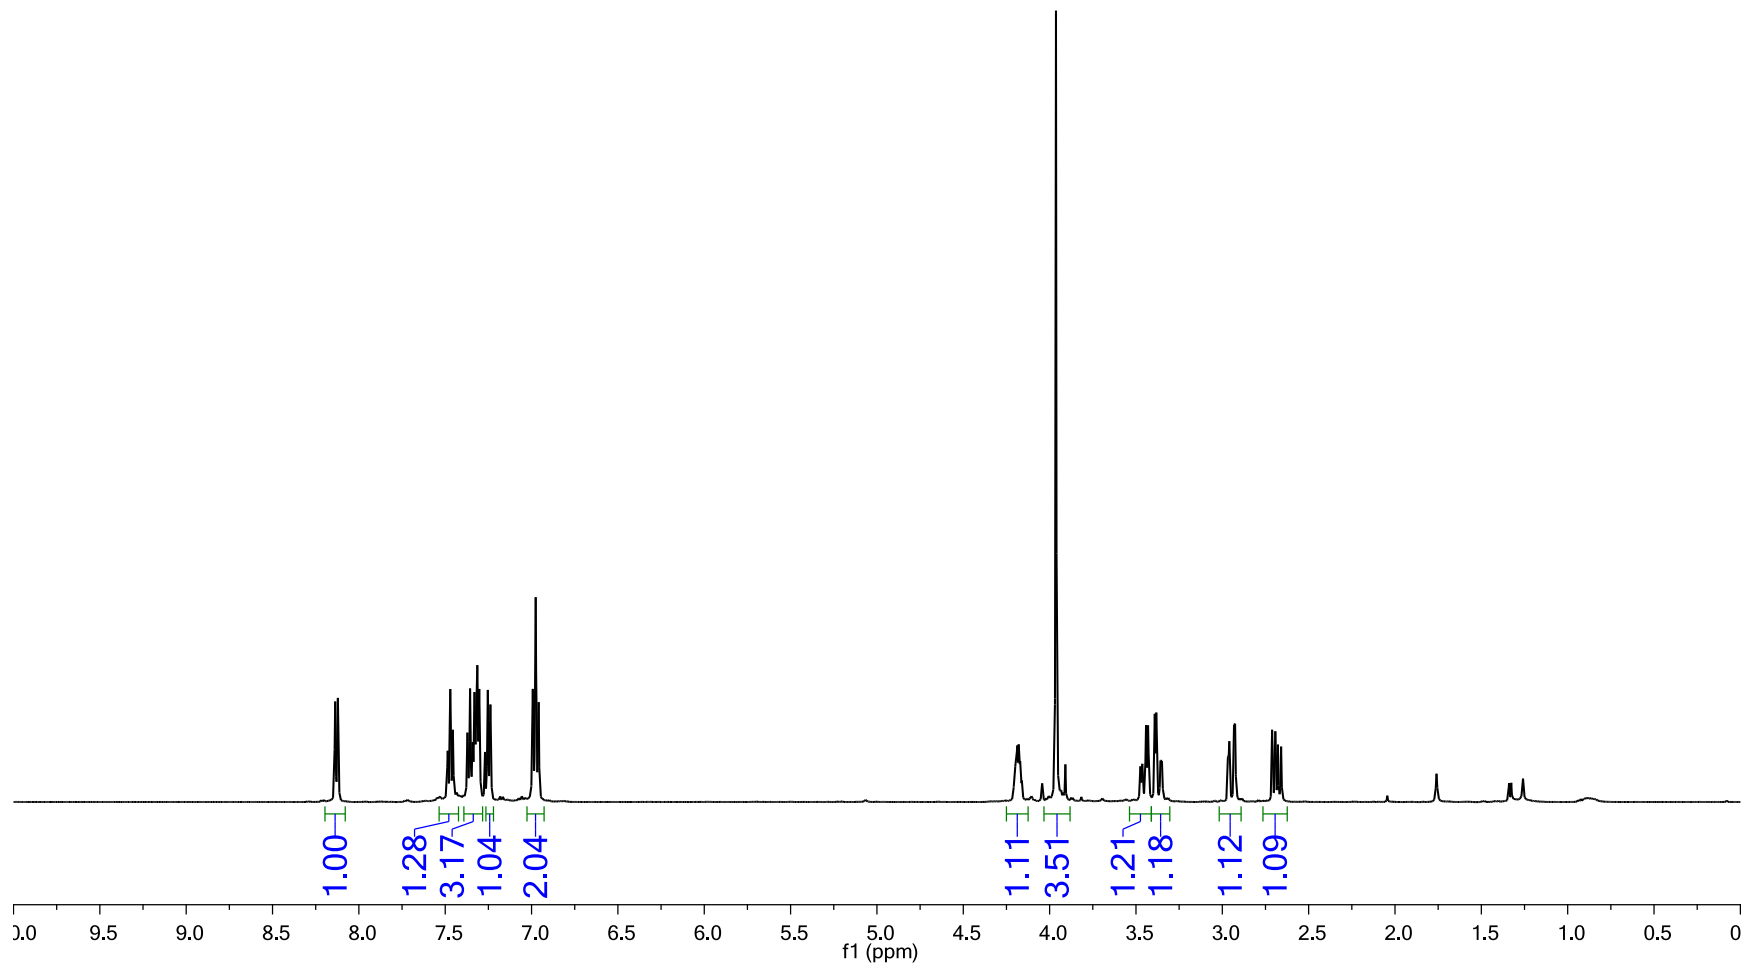

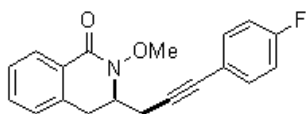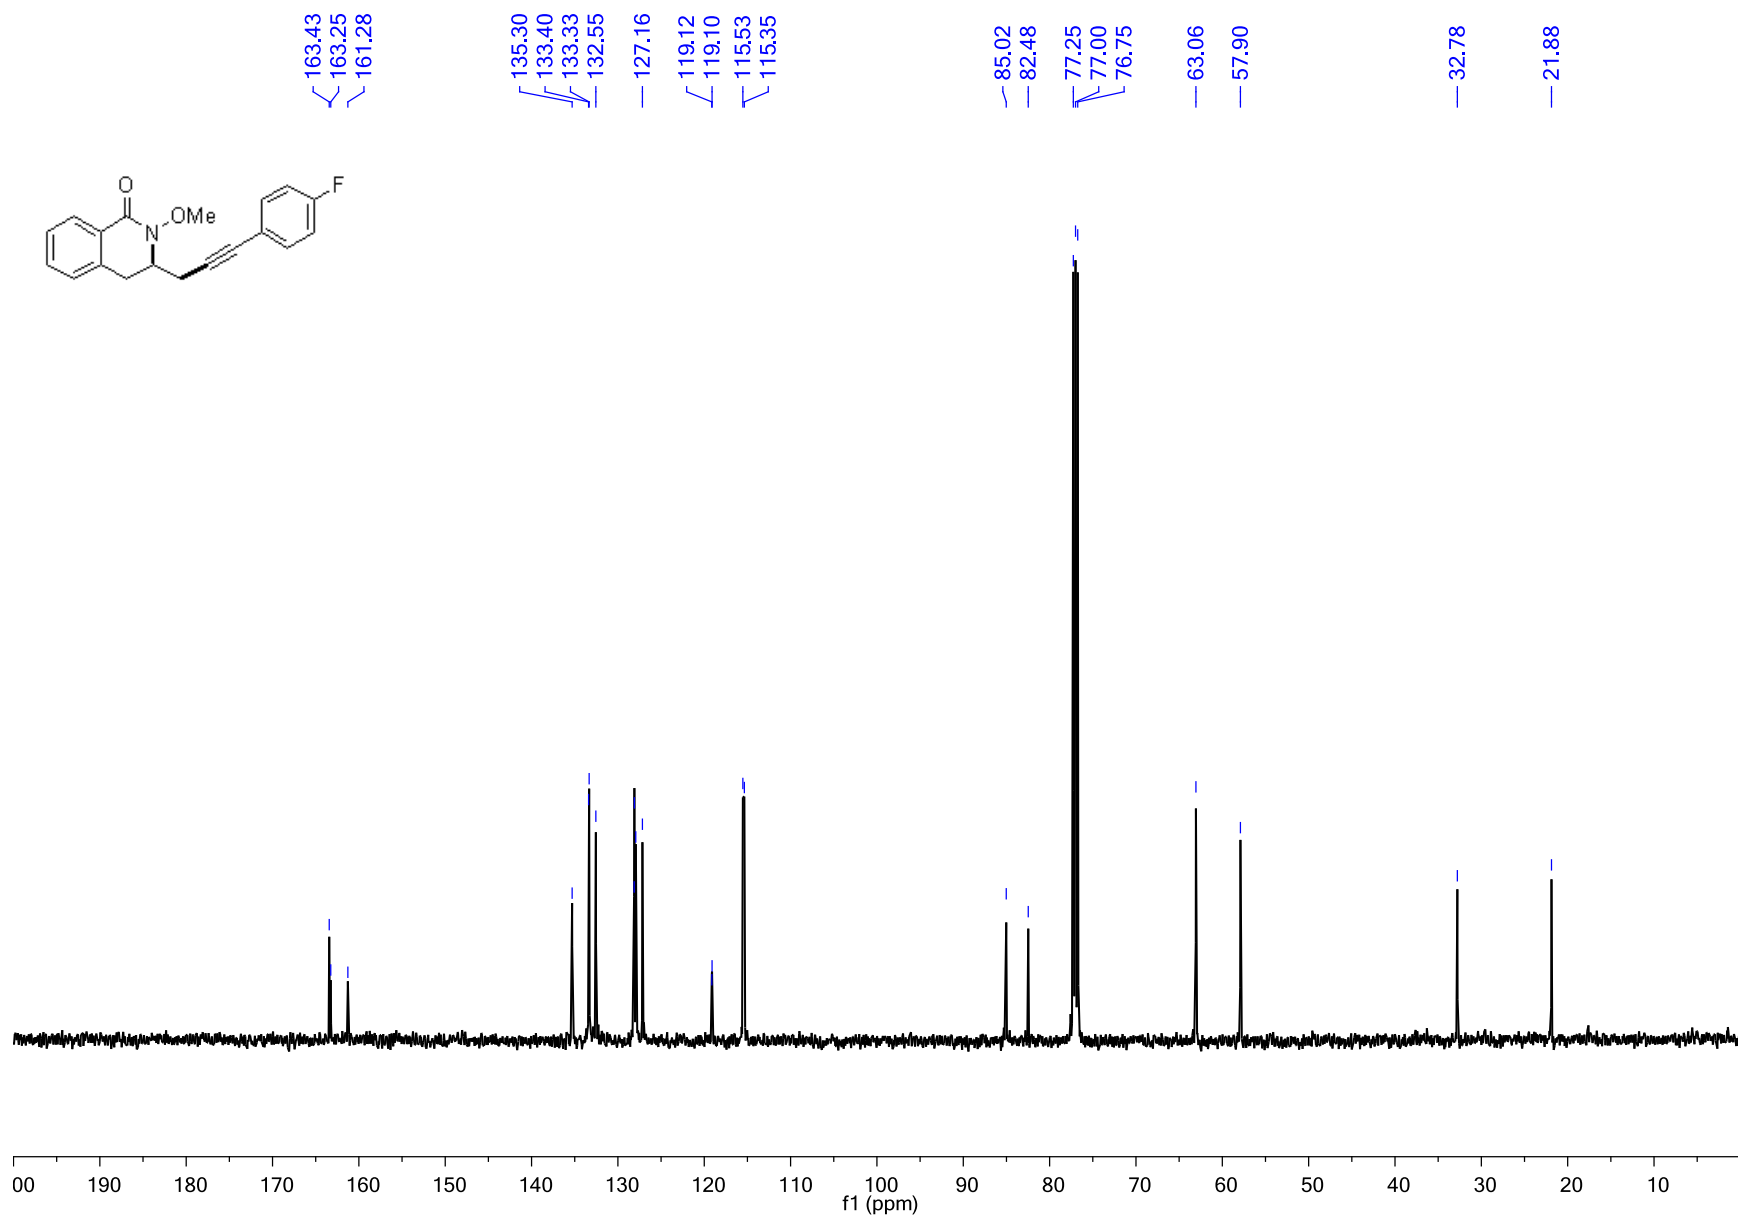

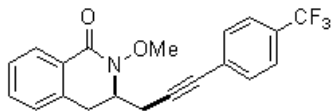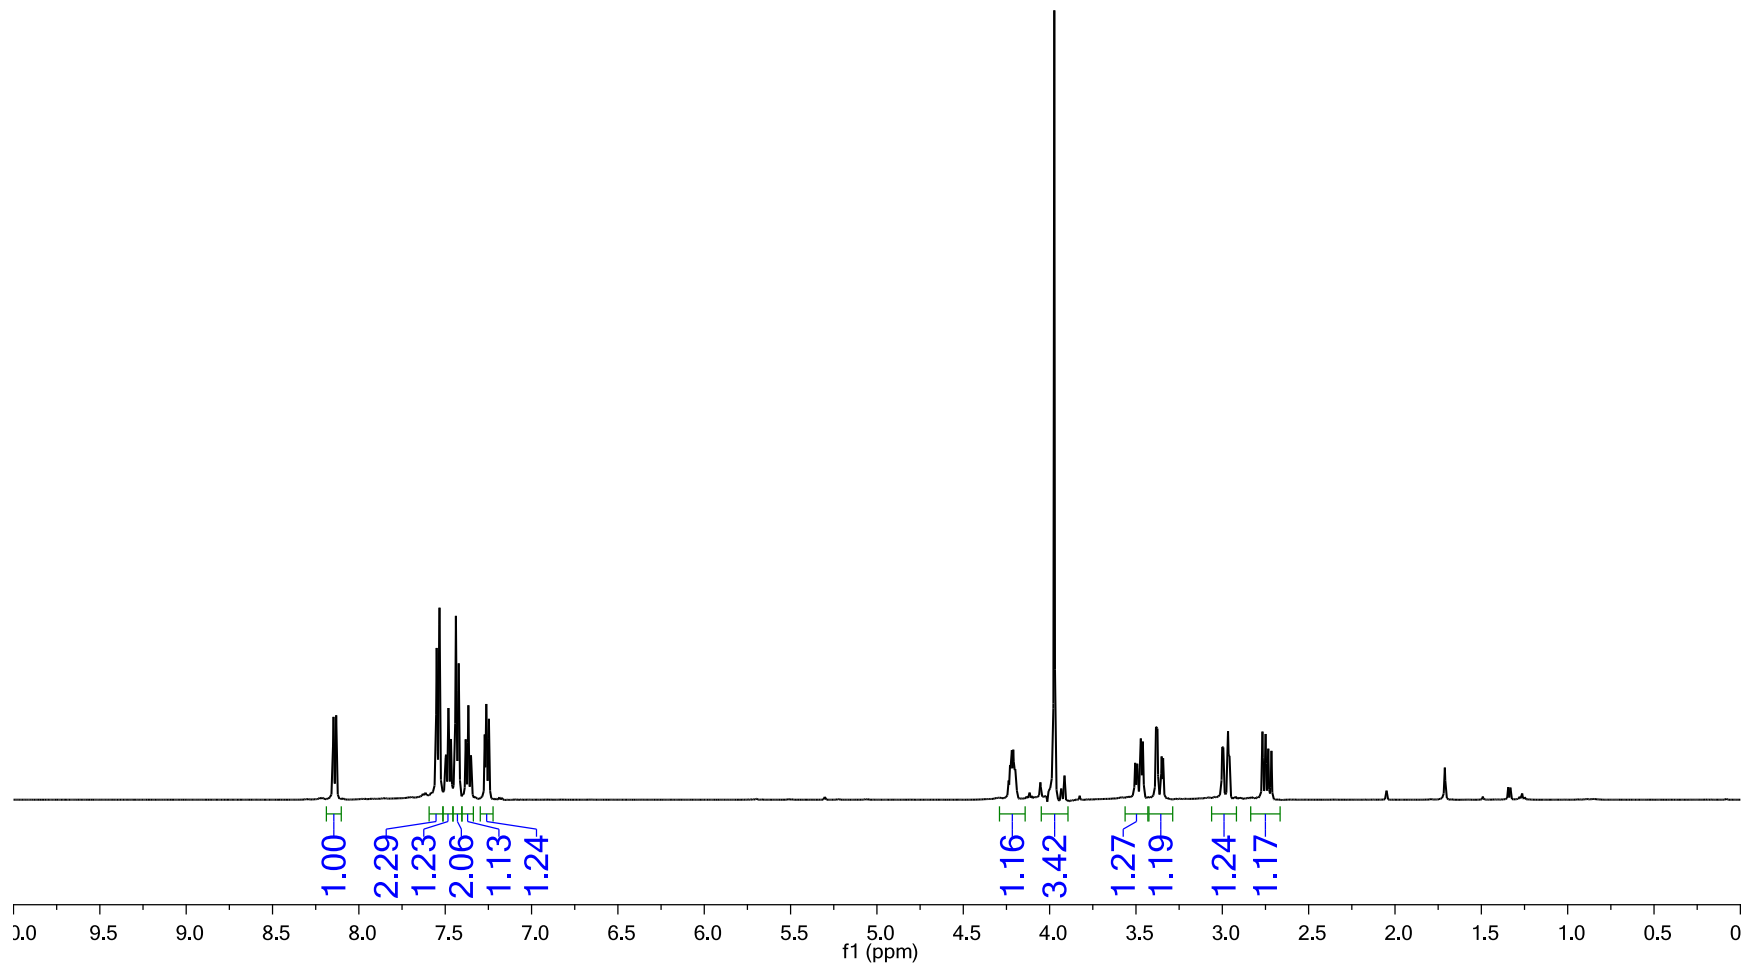

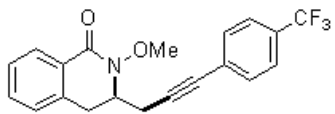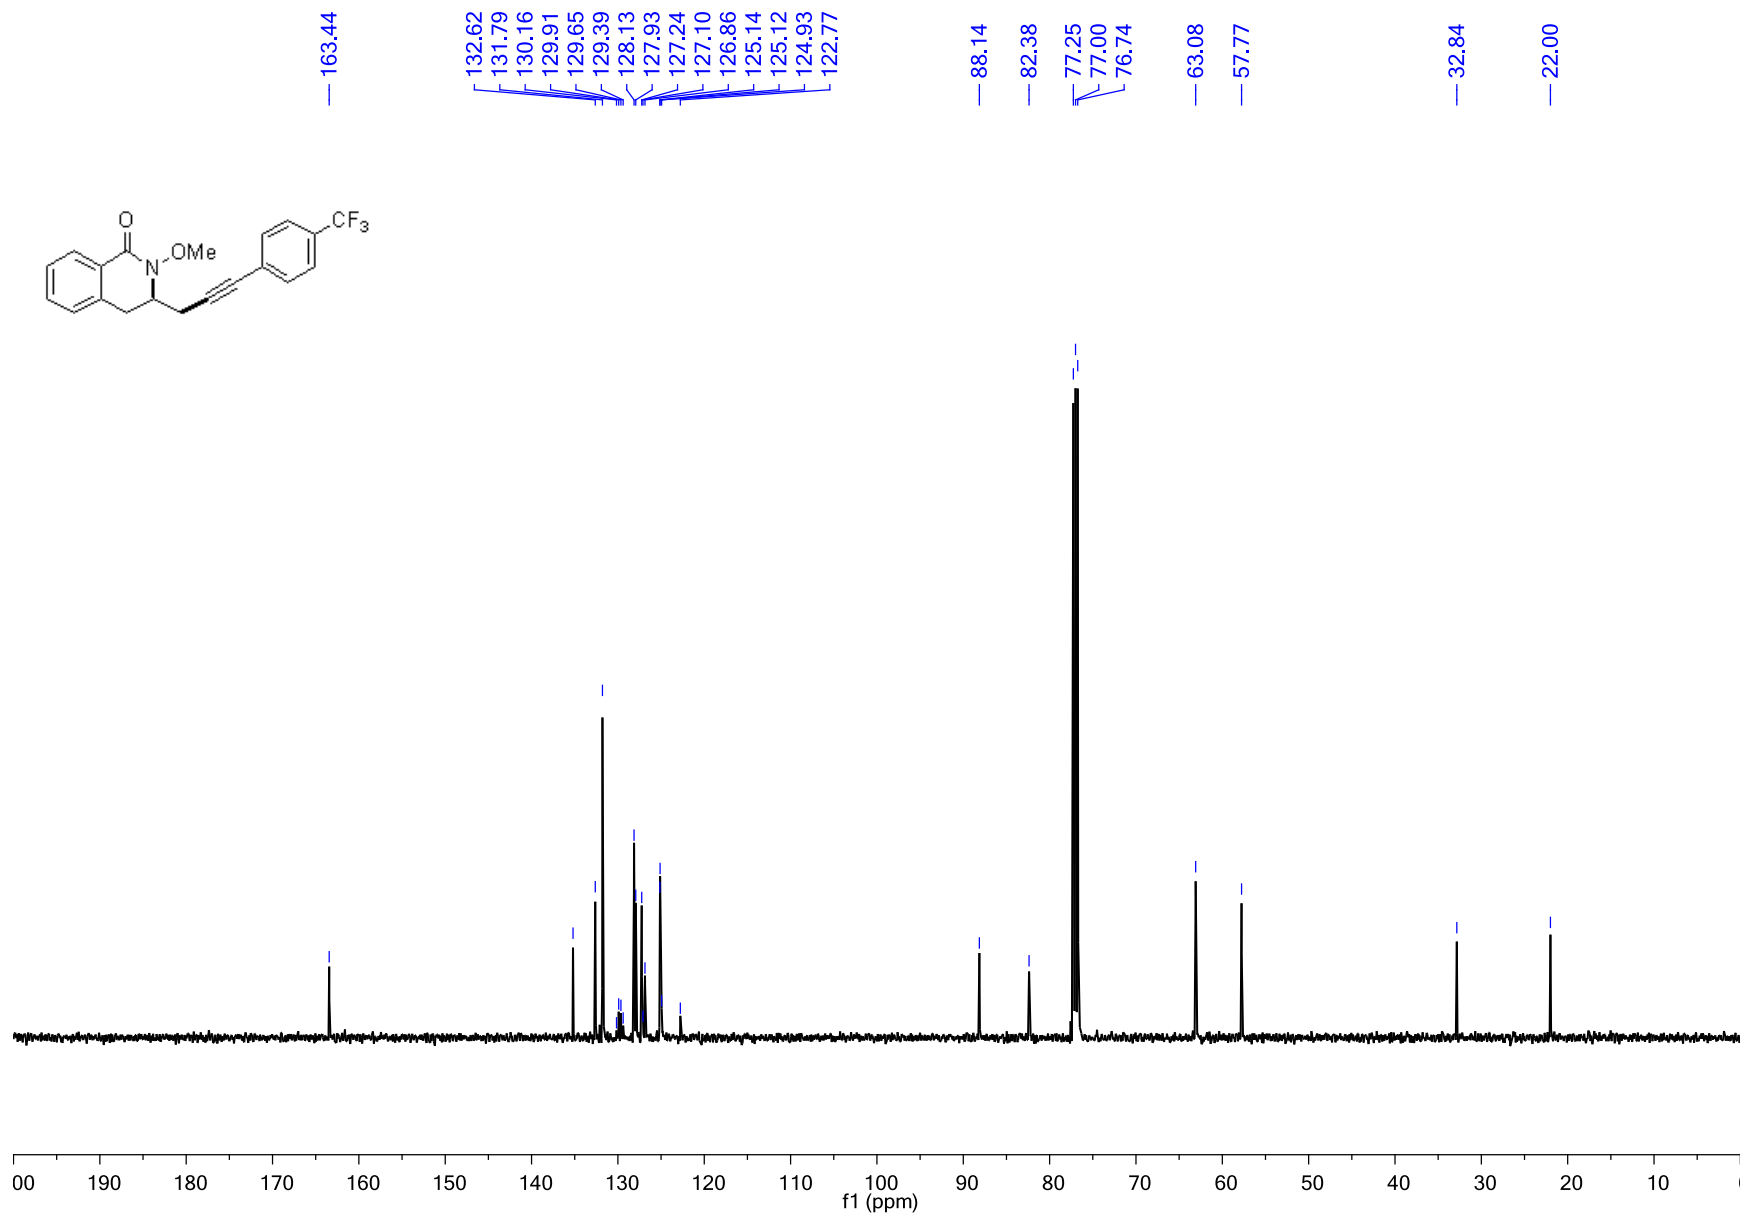

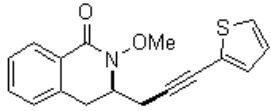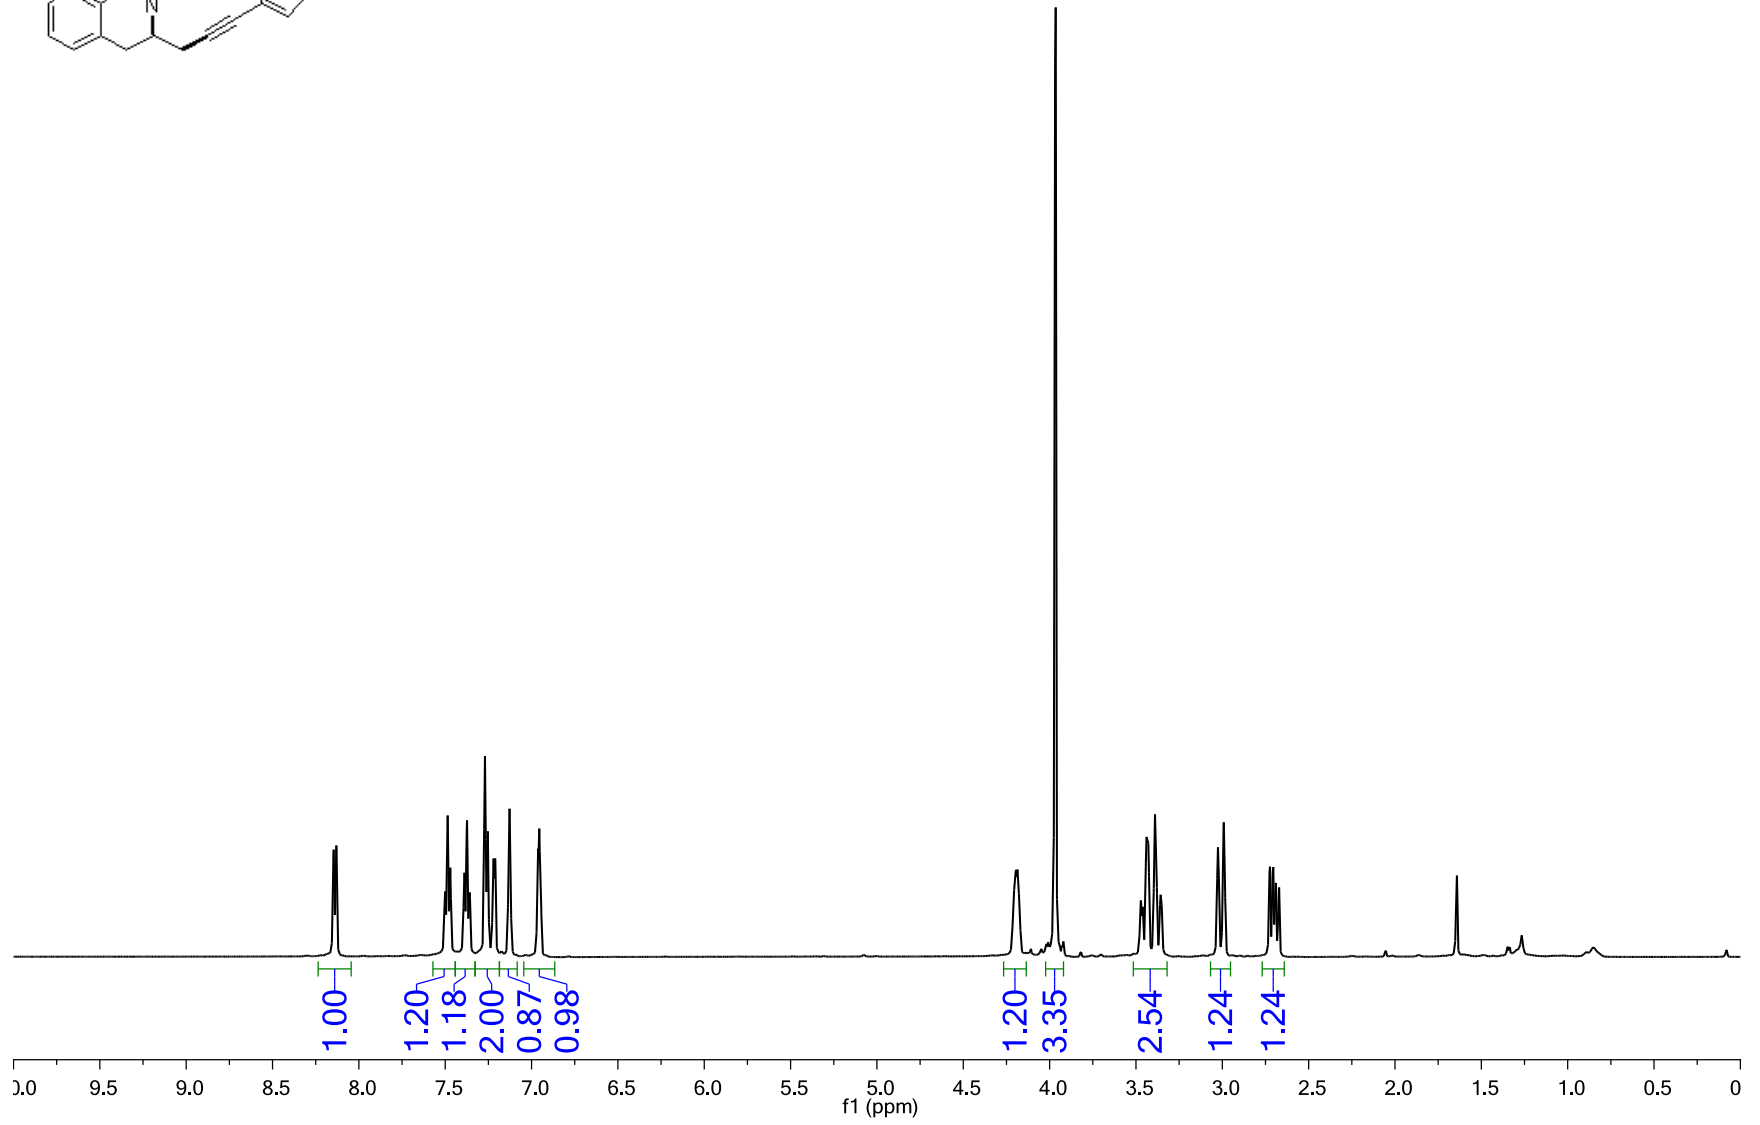

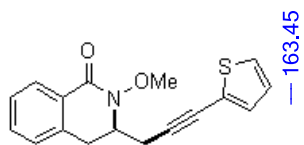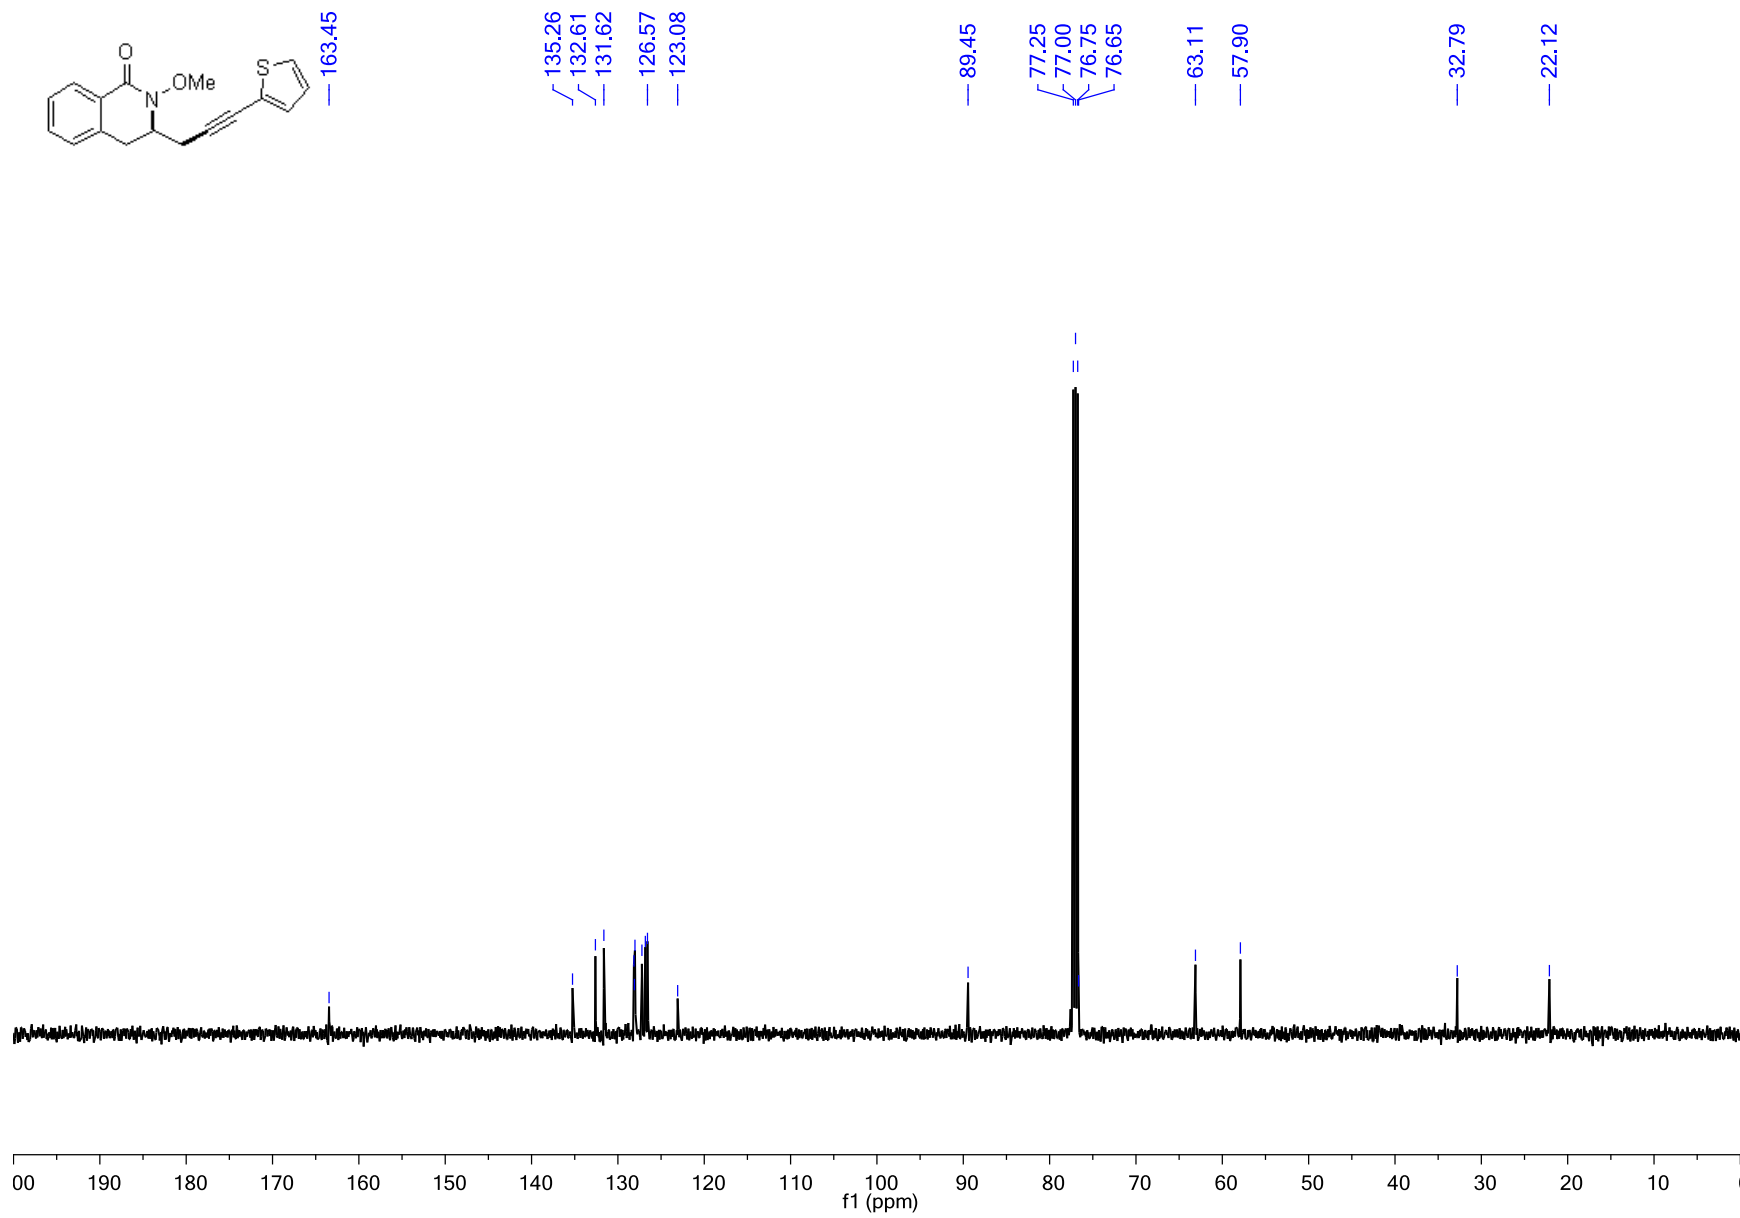

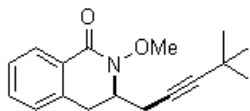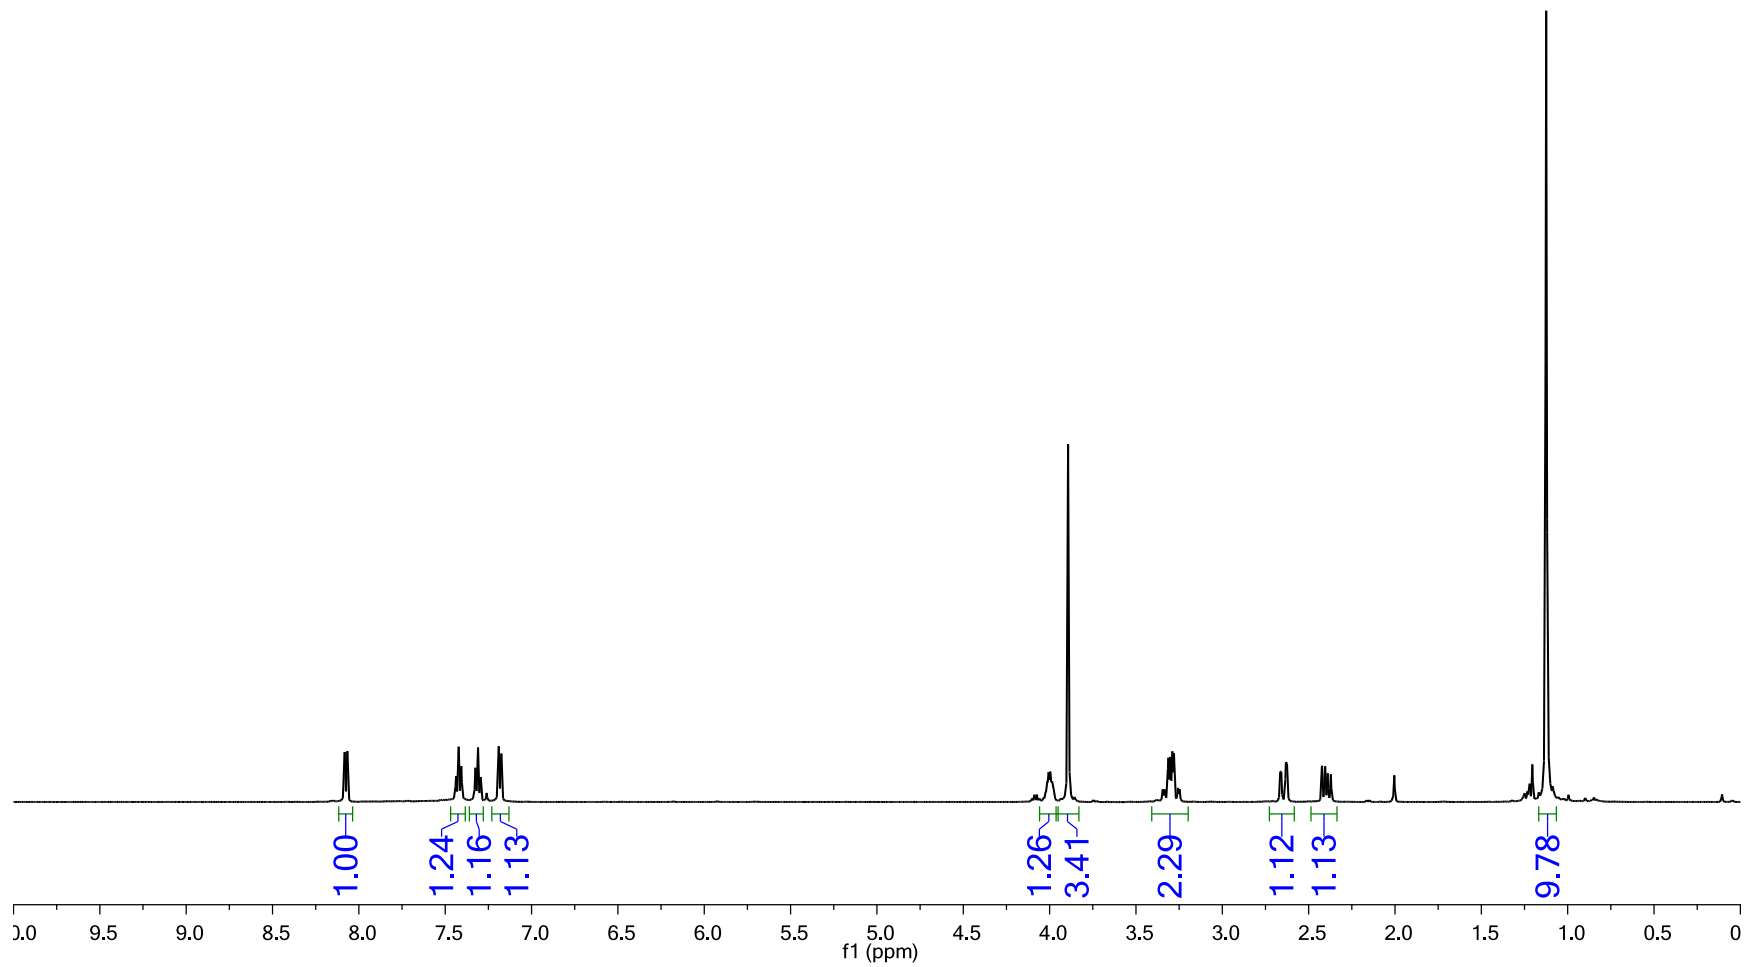



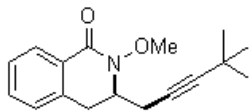

— 163.30

— 135.54  
— 132.34  
— 128.10  
— 127.92  
— 127.80  
— 126.91

— 92.18

— 77.25  
— 77.00  
— 76.75  
— 73.78

— 62.90  
— 58.05

— 32.47  
— 30.99  
— 27.25  
— 21.18

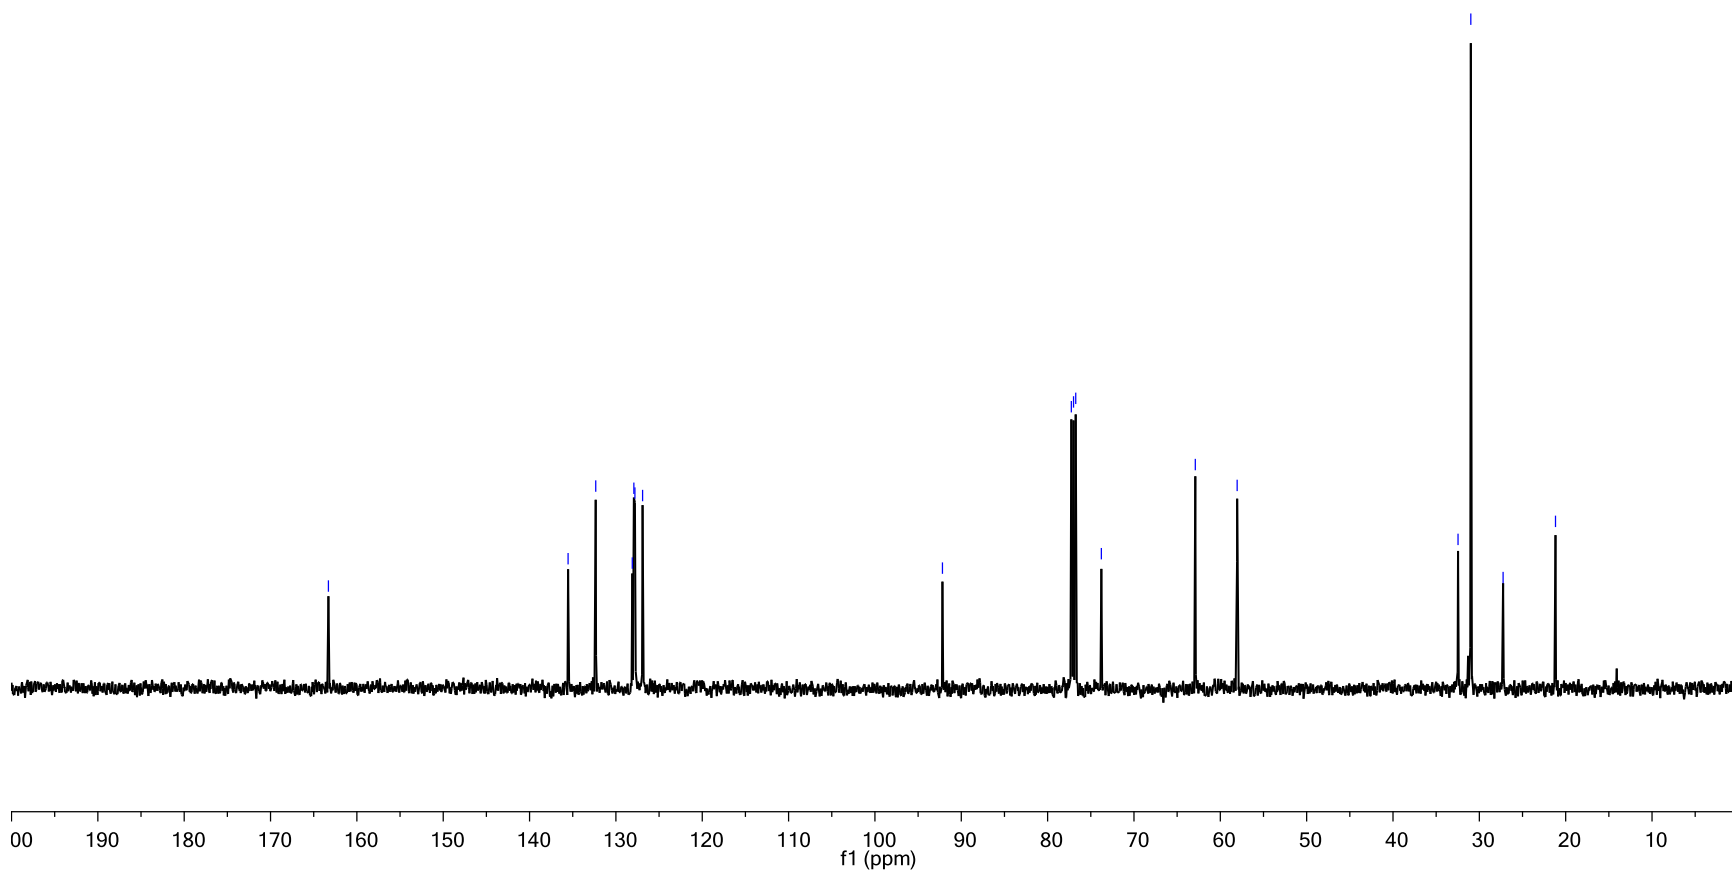

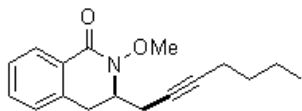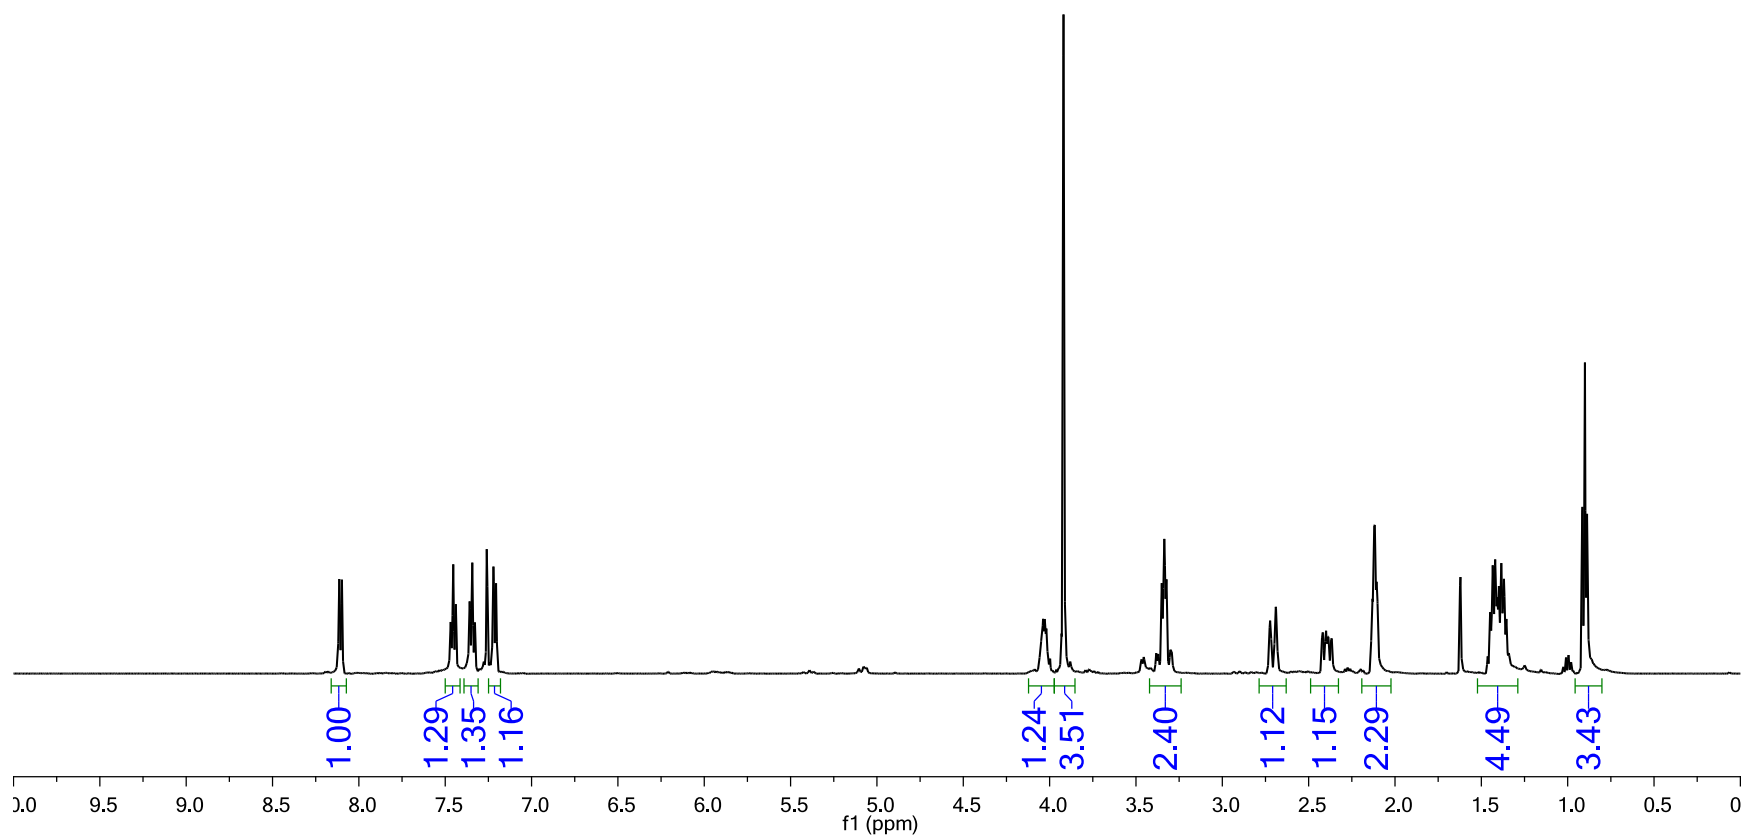

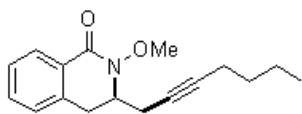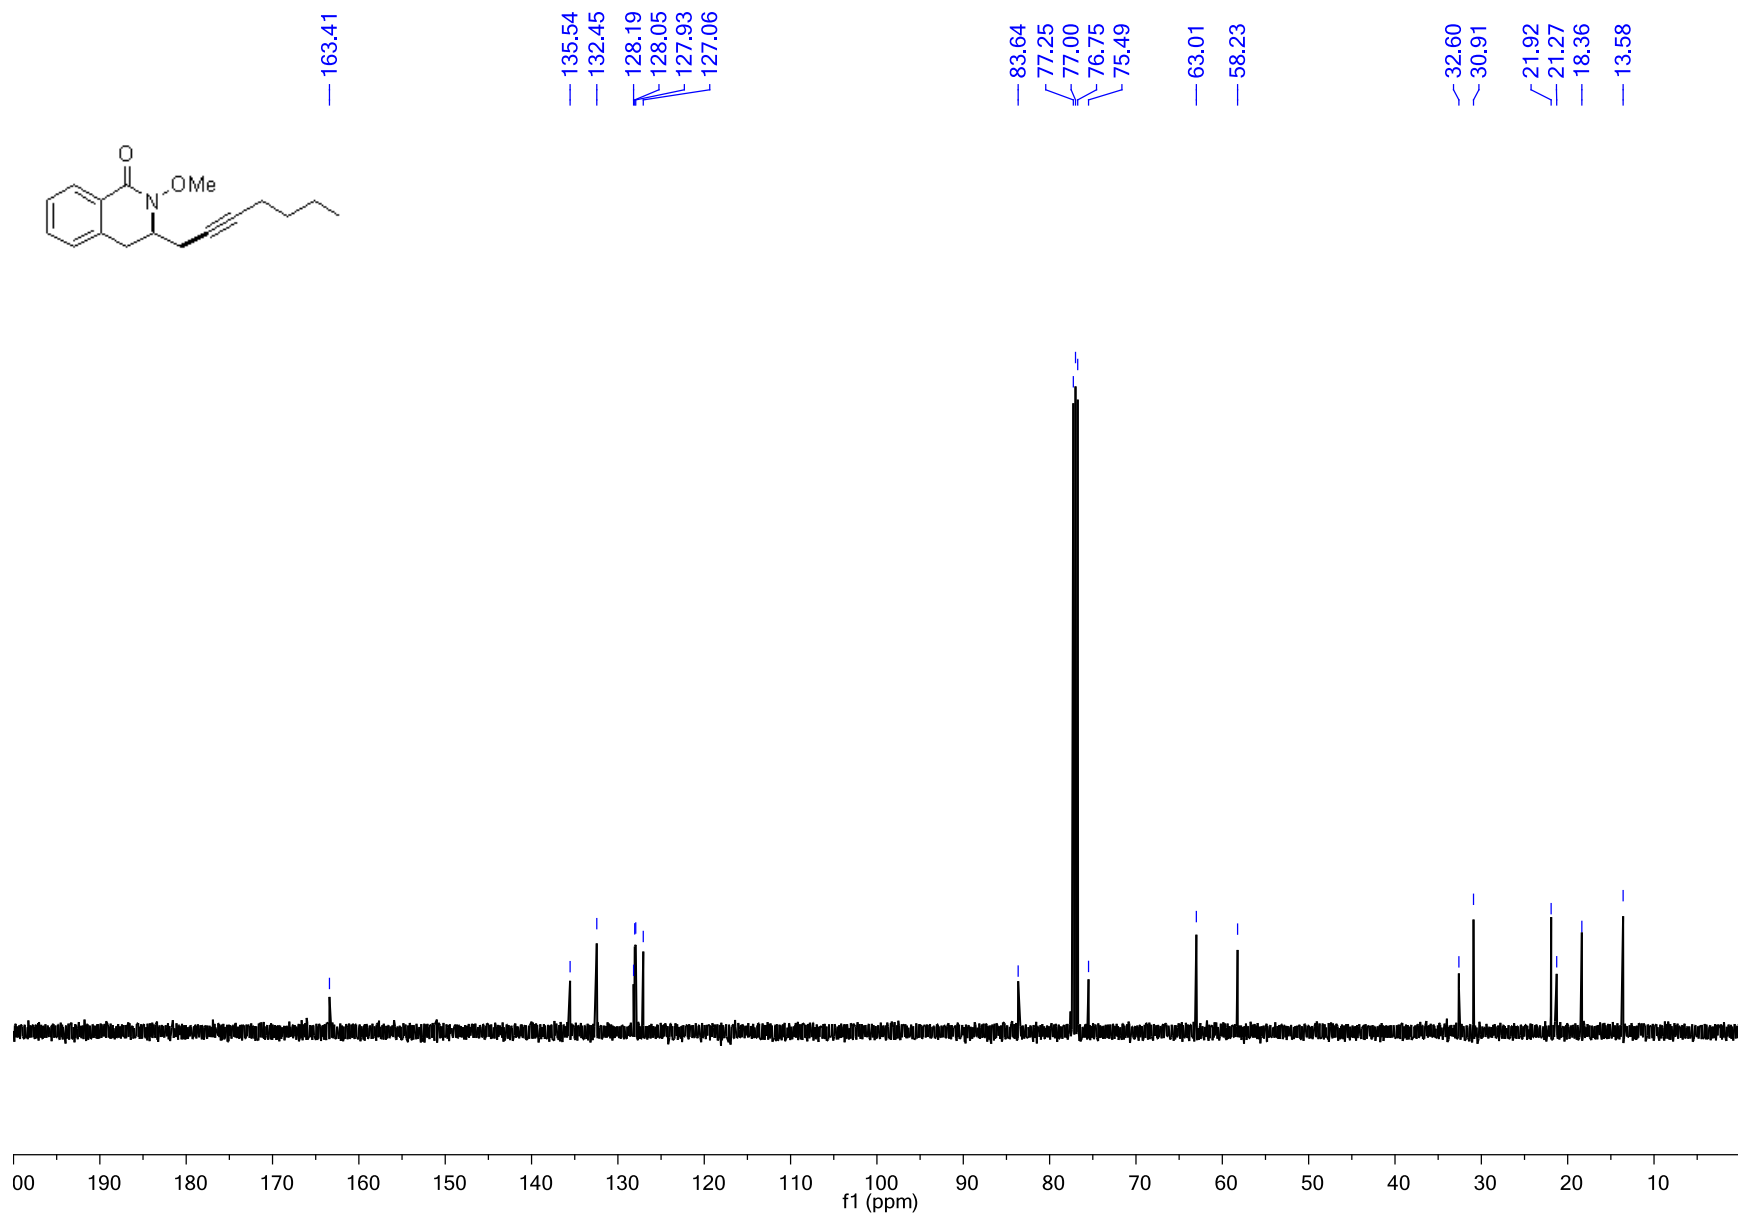



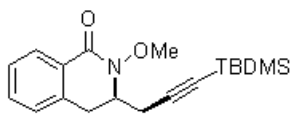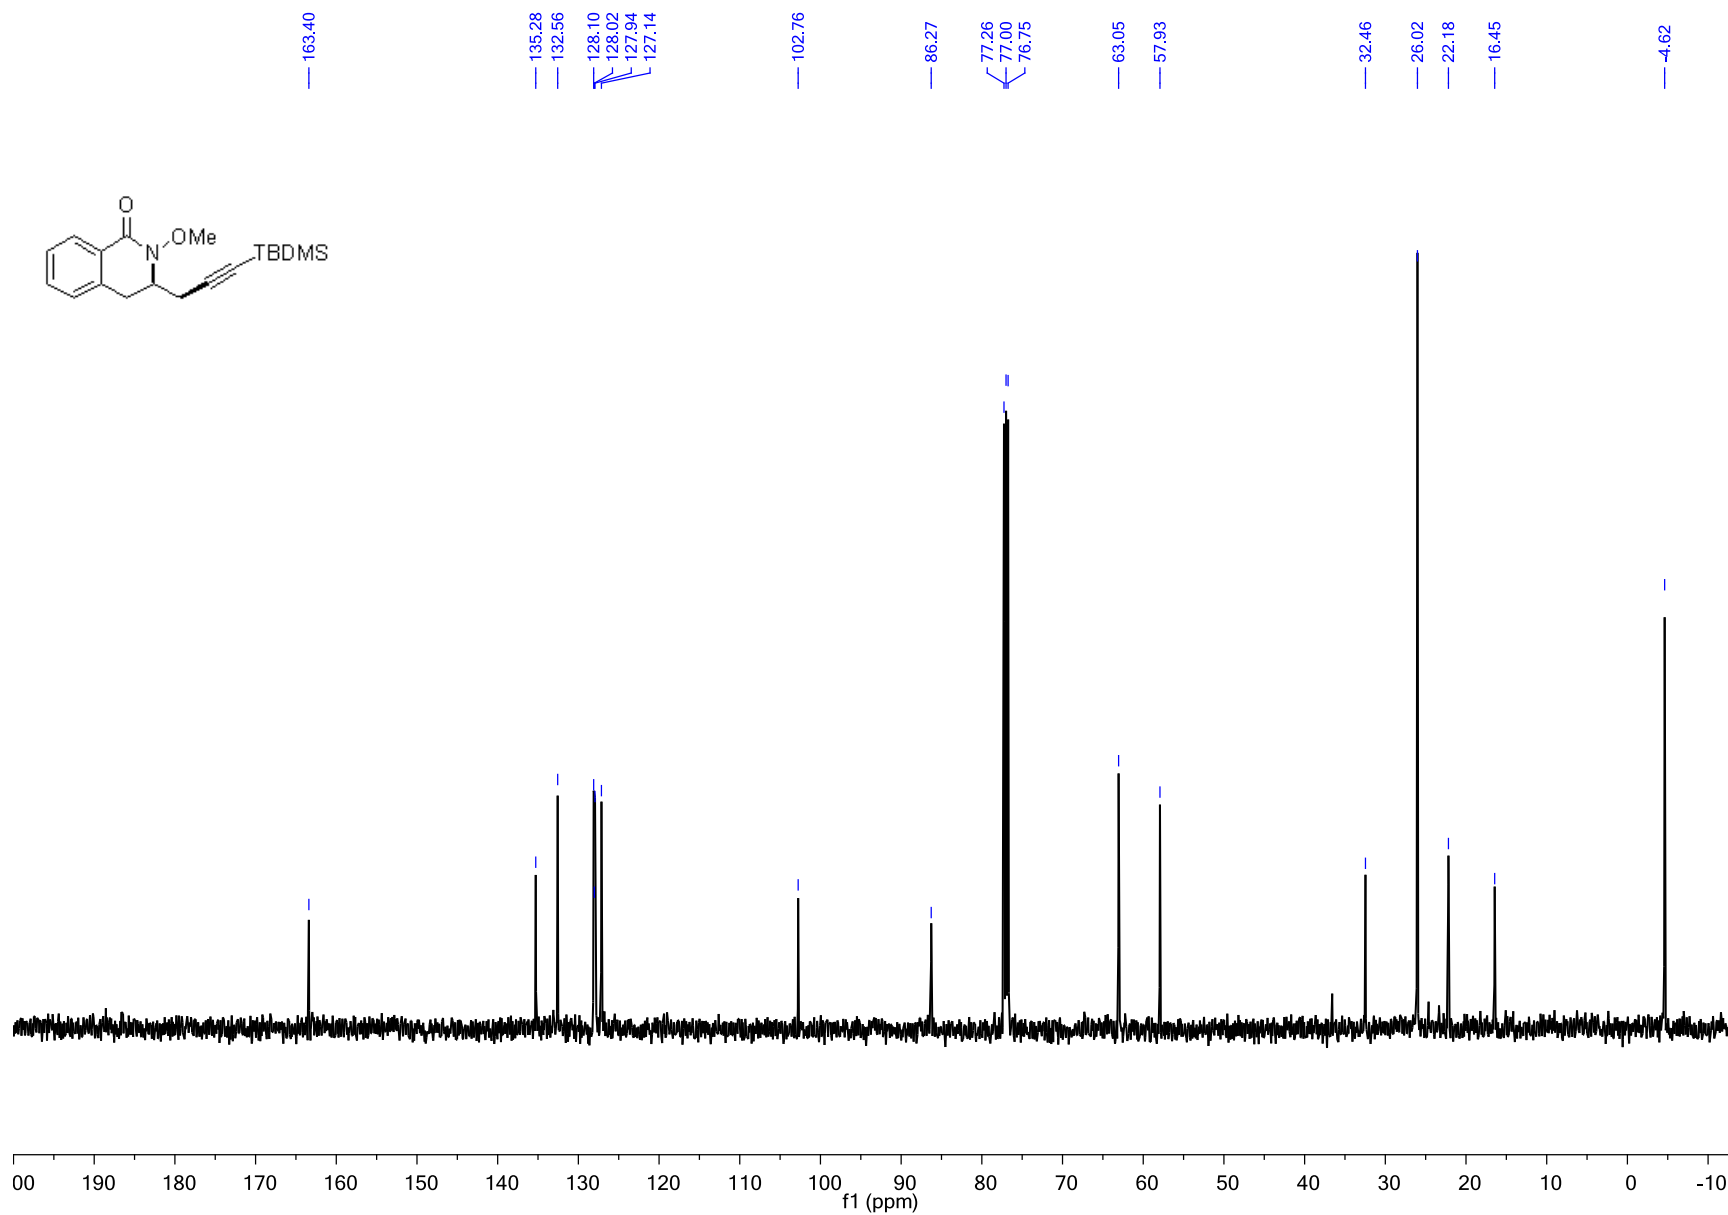

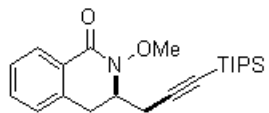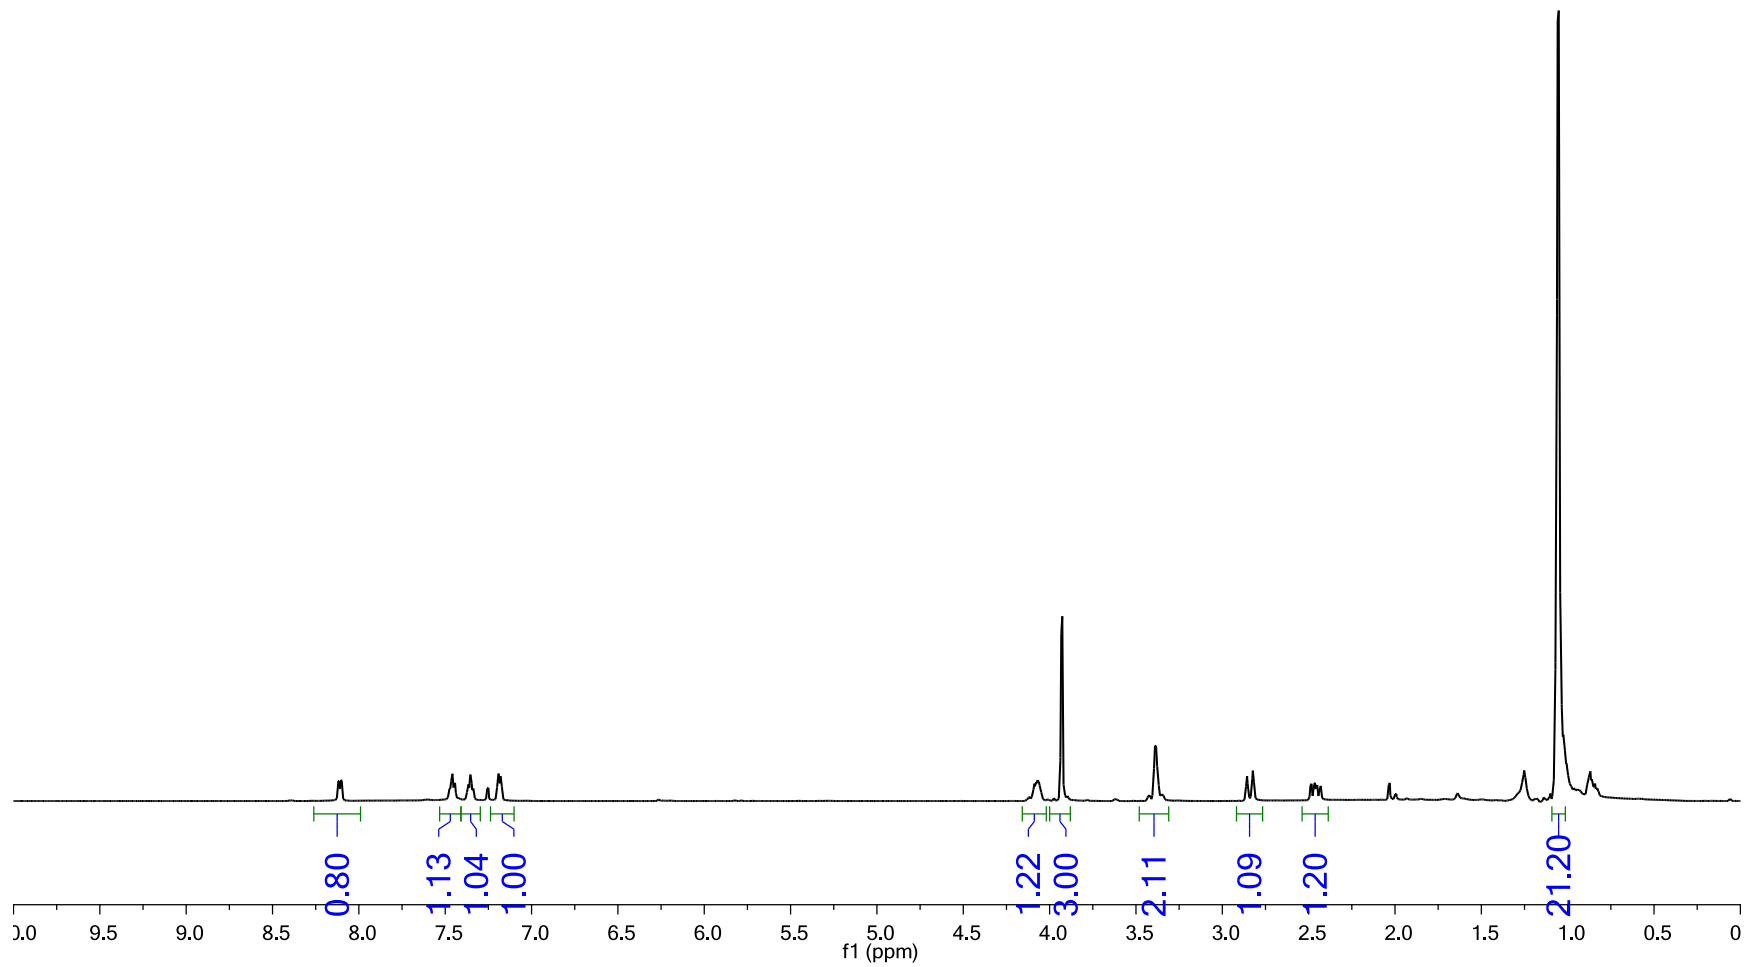

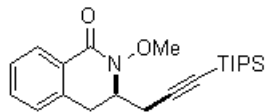

163.46

135.36

132.61

128.18

128.11

127.94

127.18

103.89

84.12

77.26

77.00

76.75

63.15

58.20

32.47

22.24

18.60

11.20

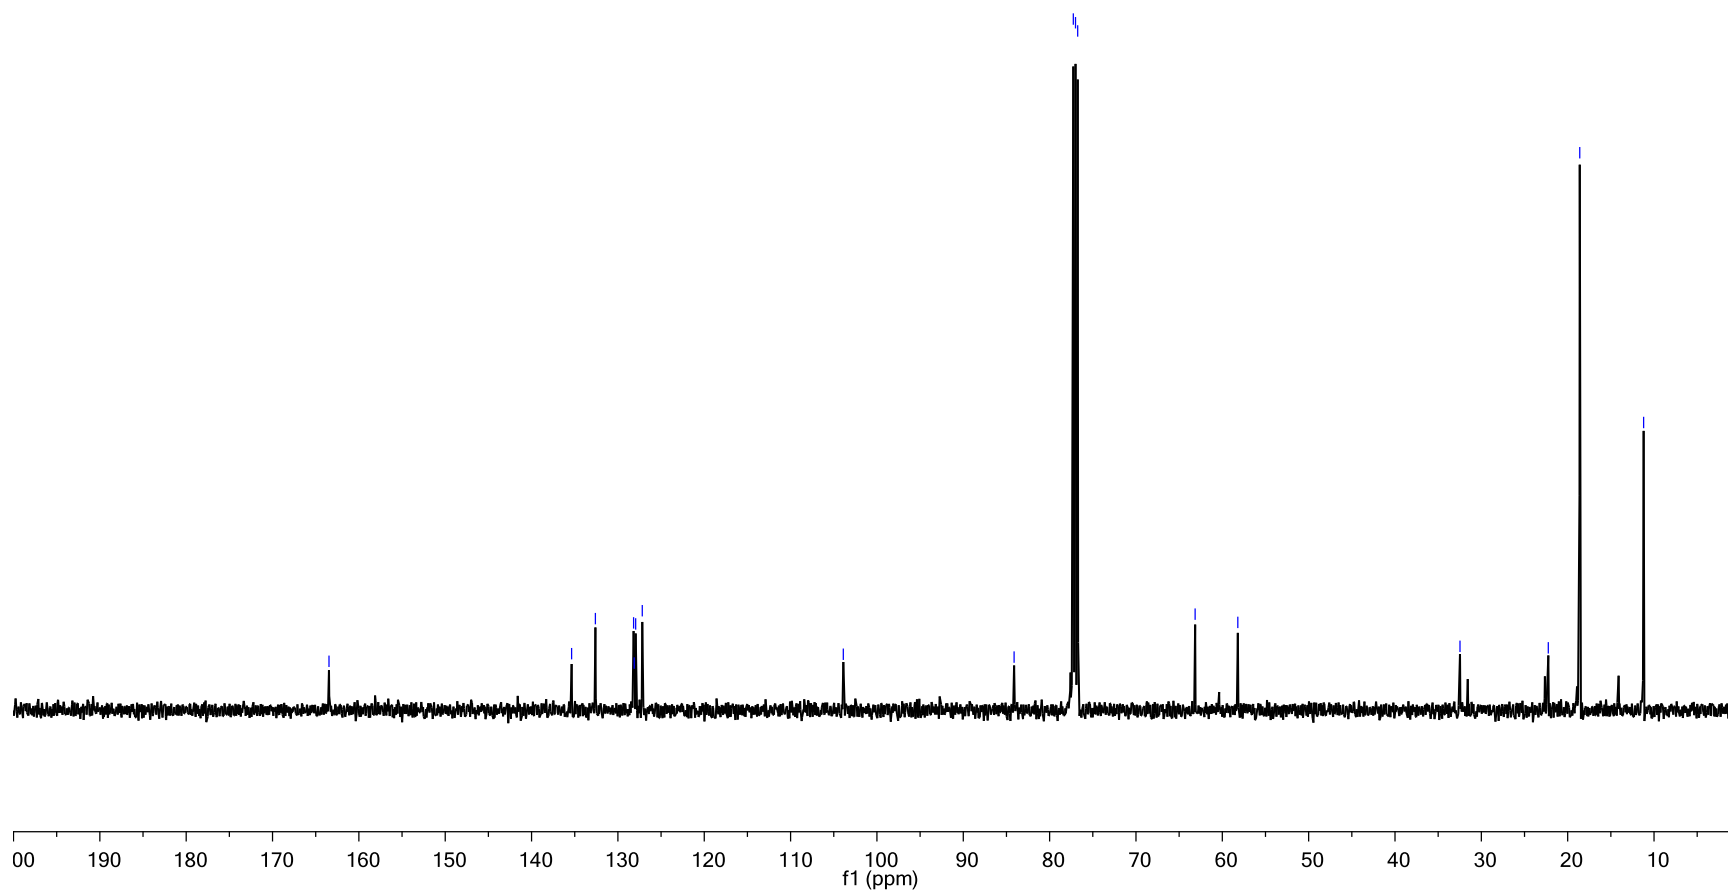

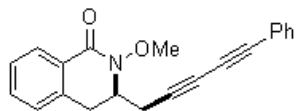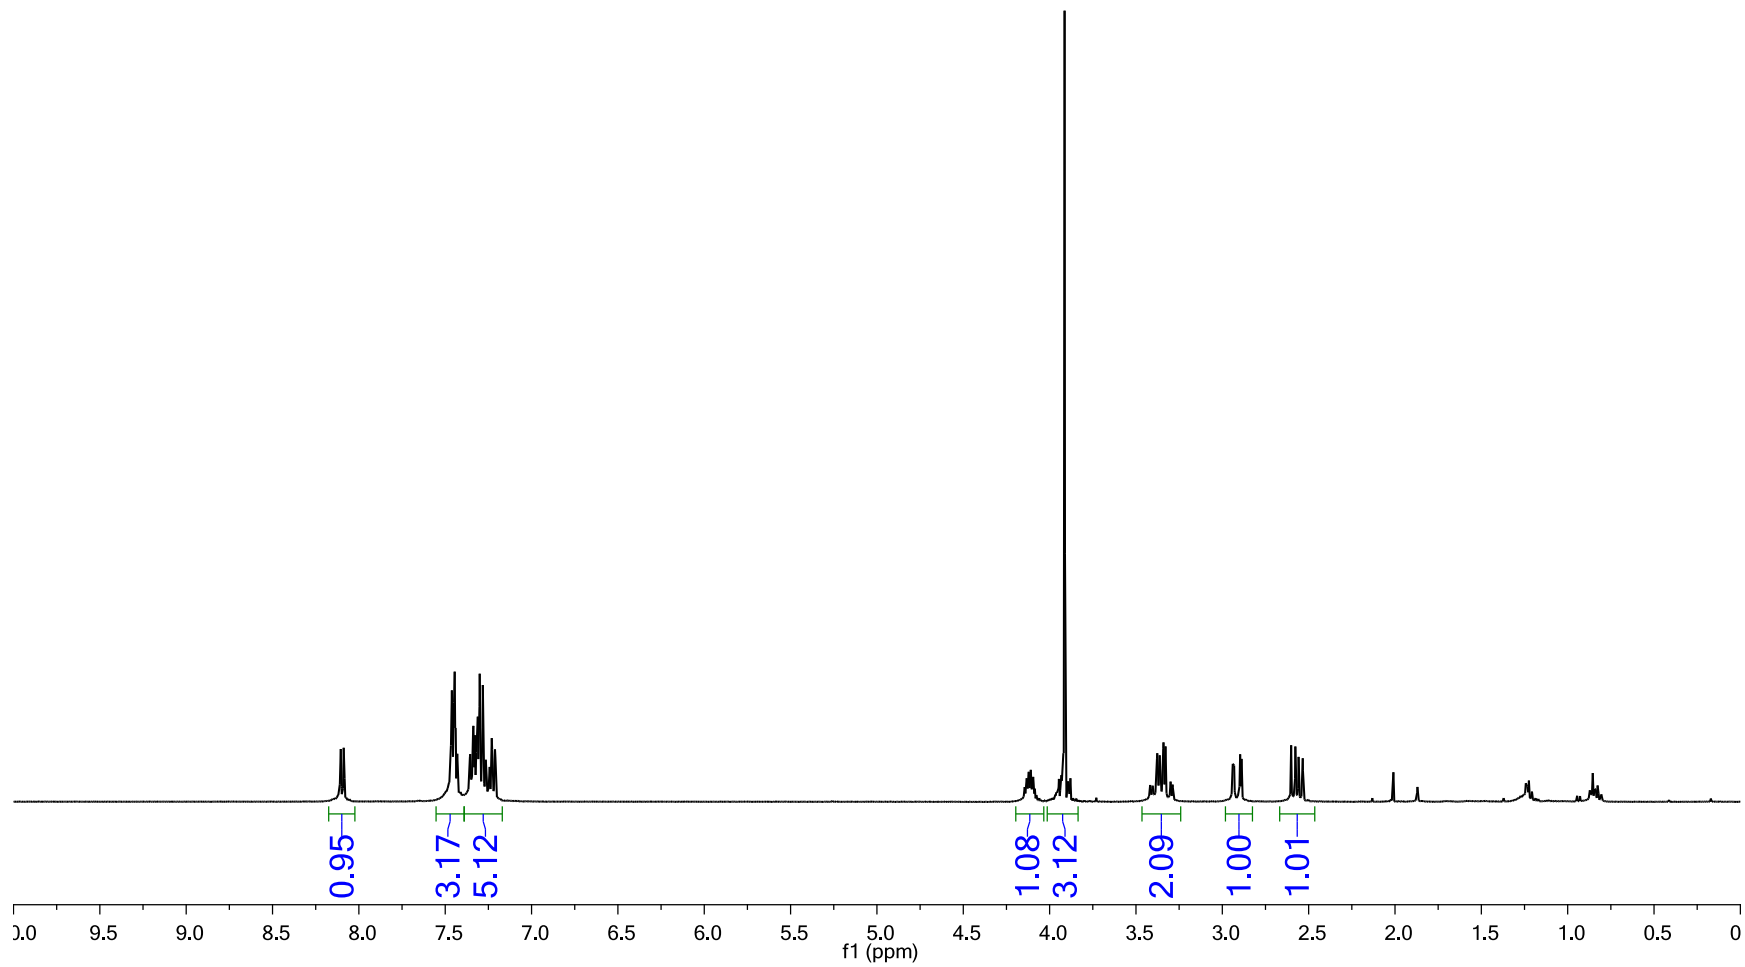



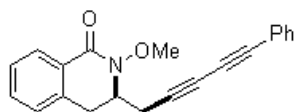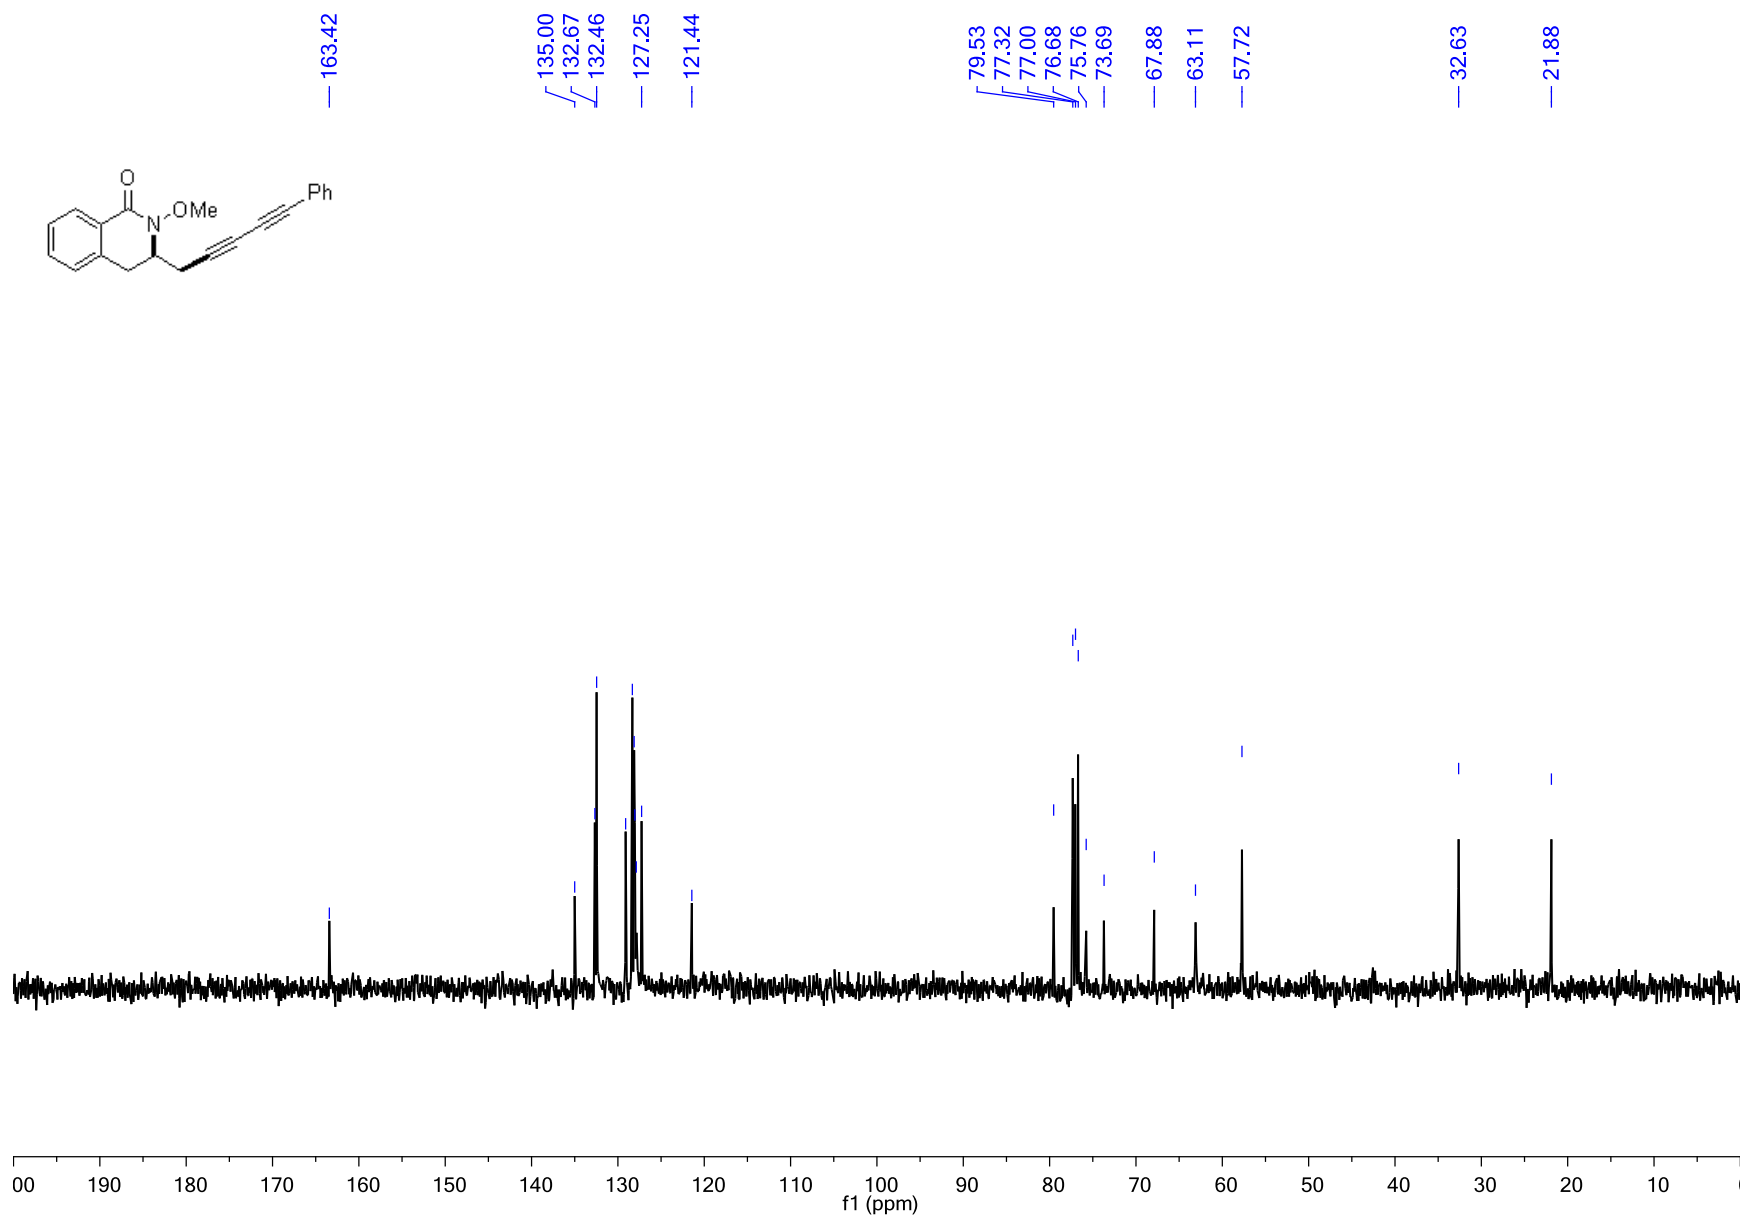

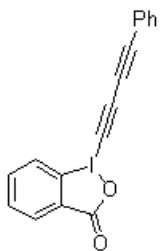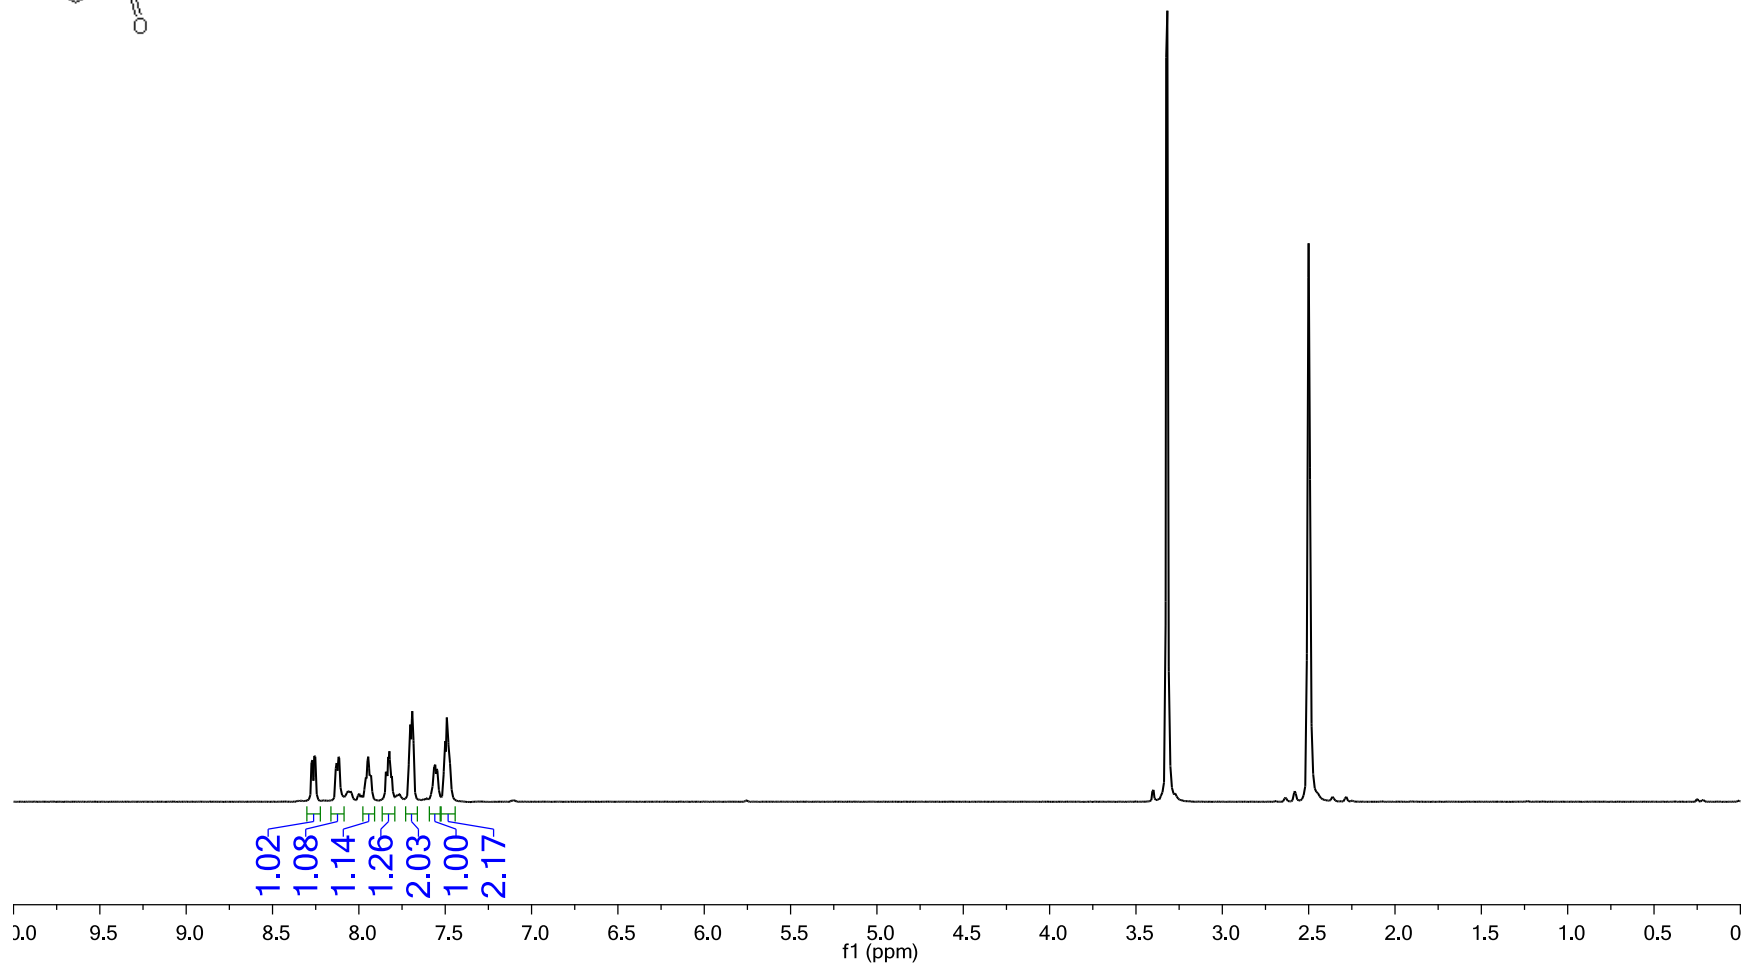

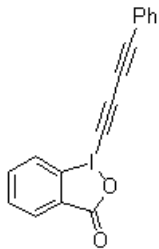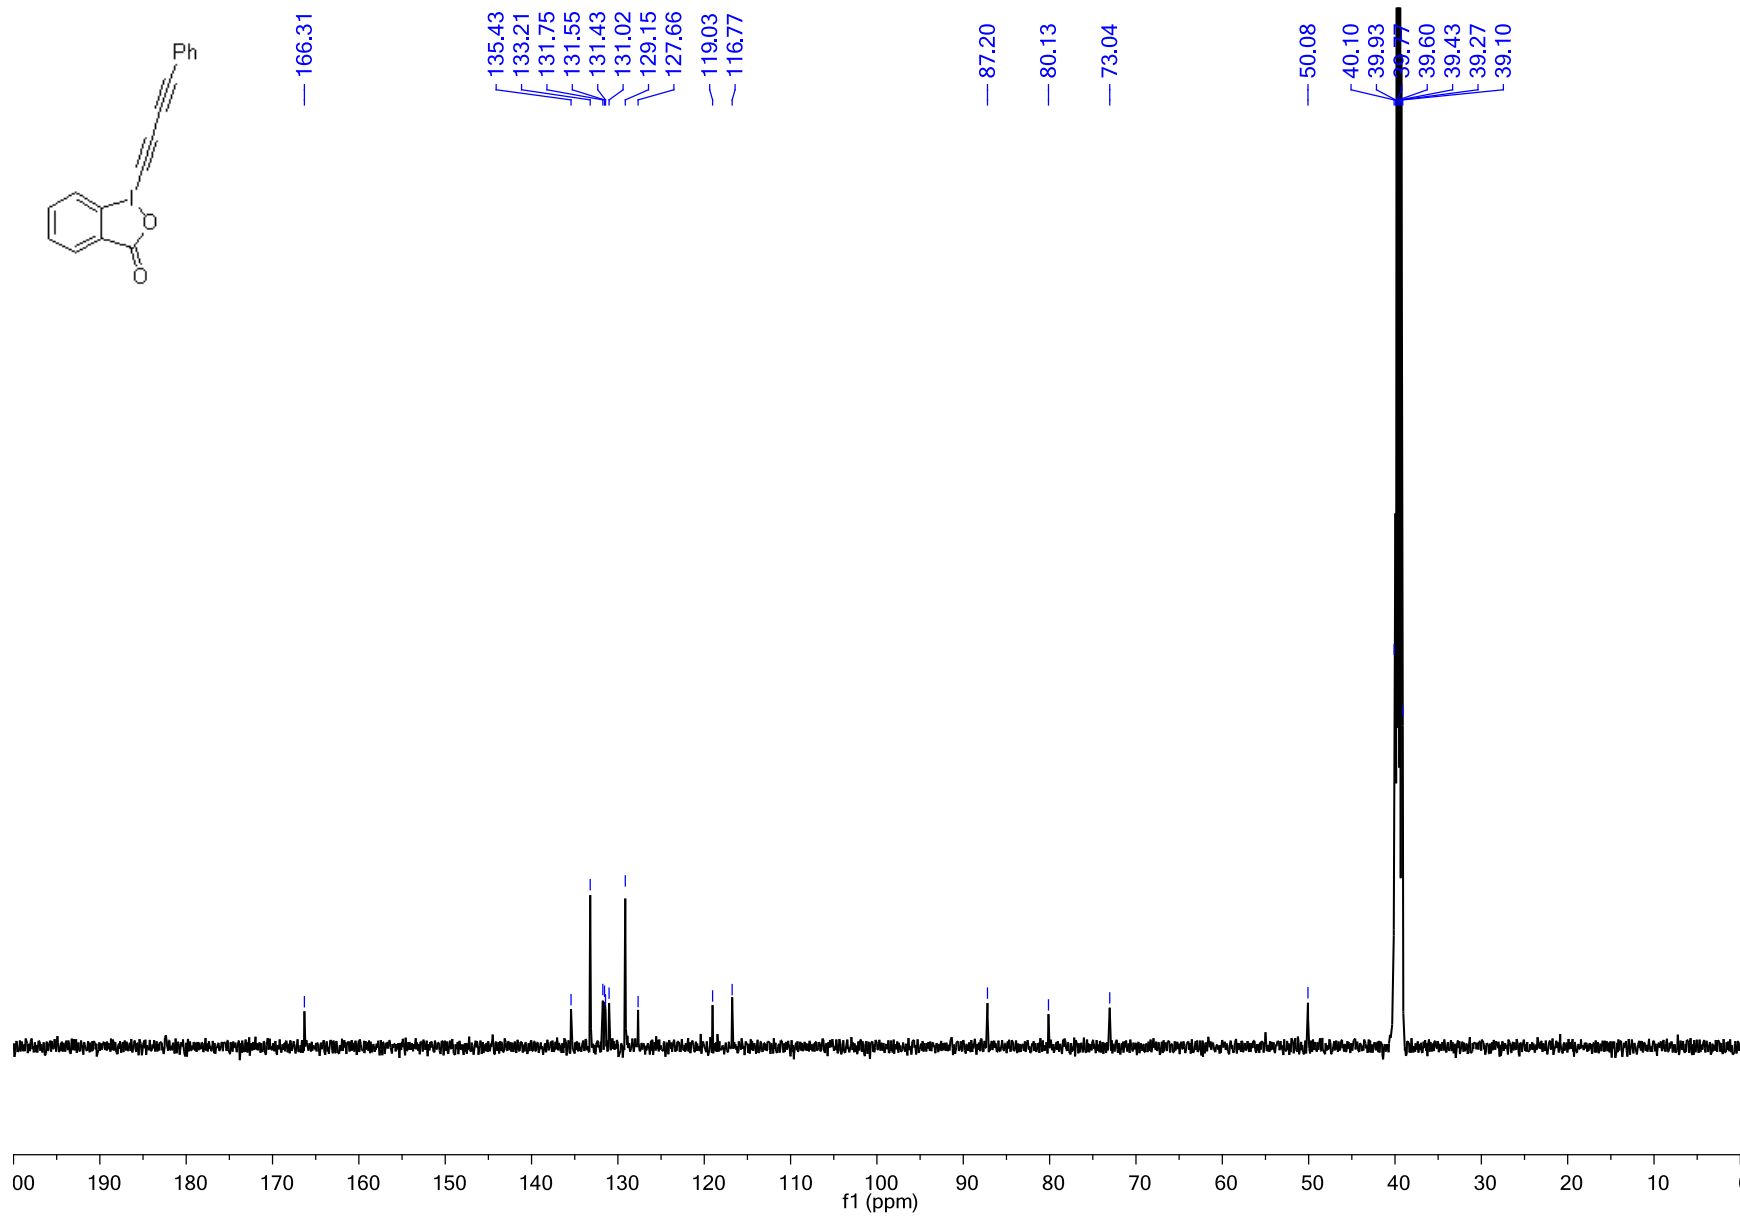

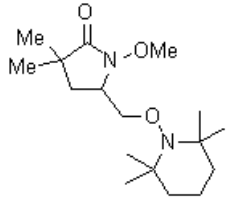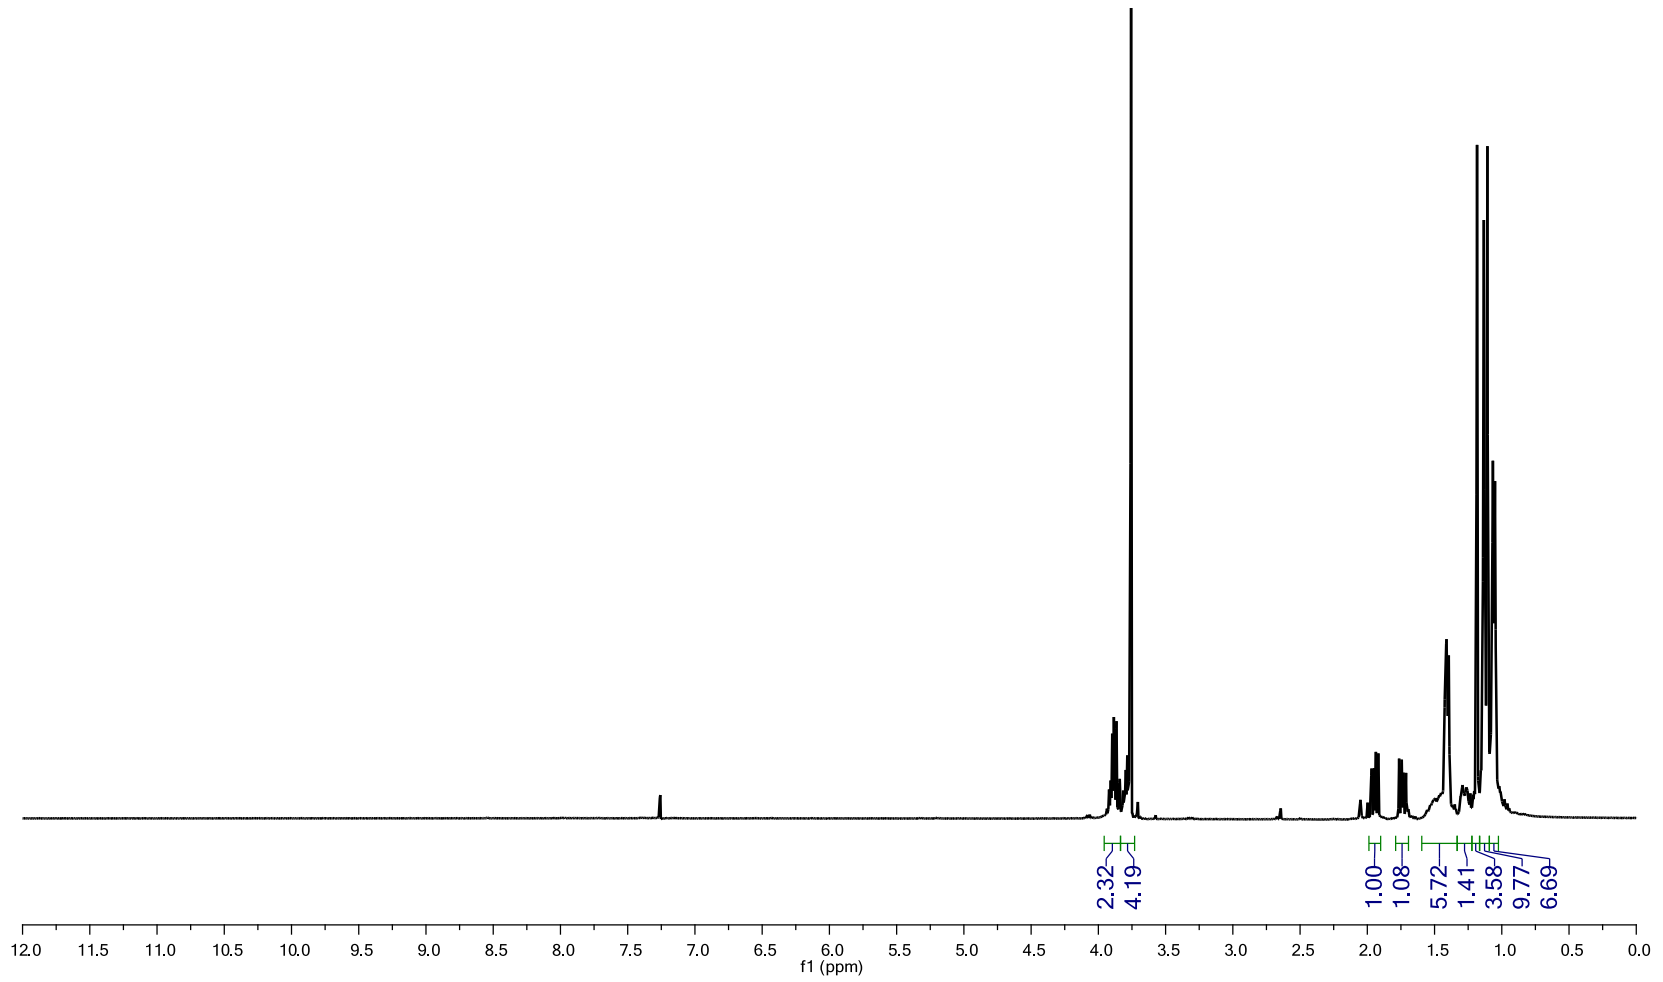

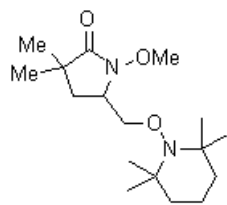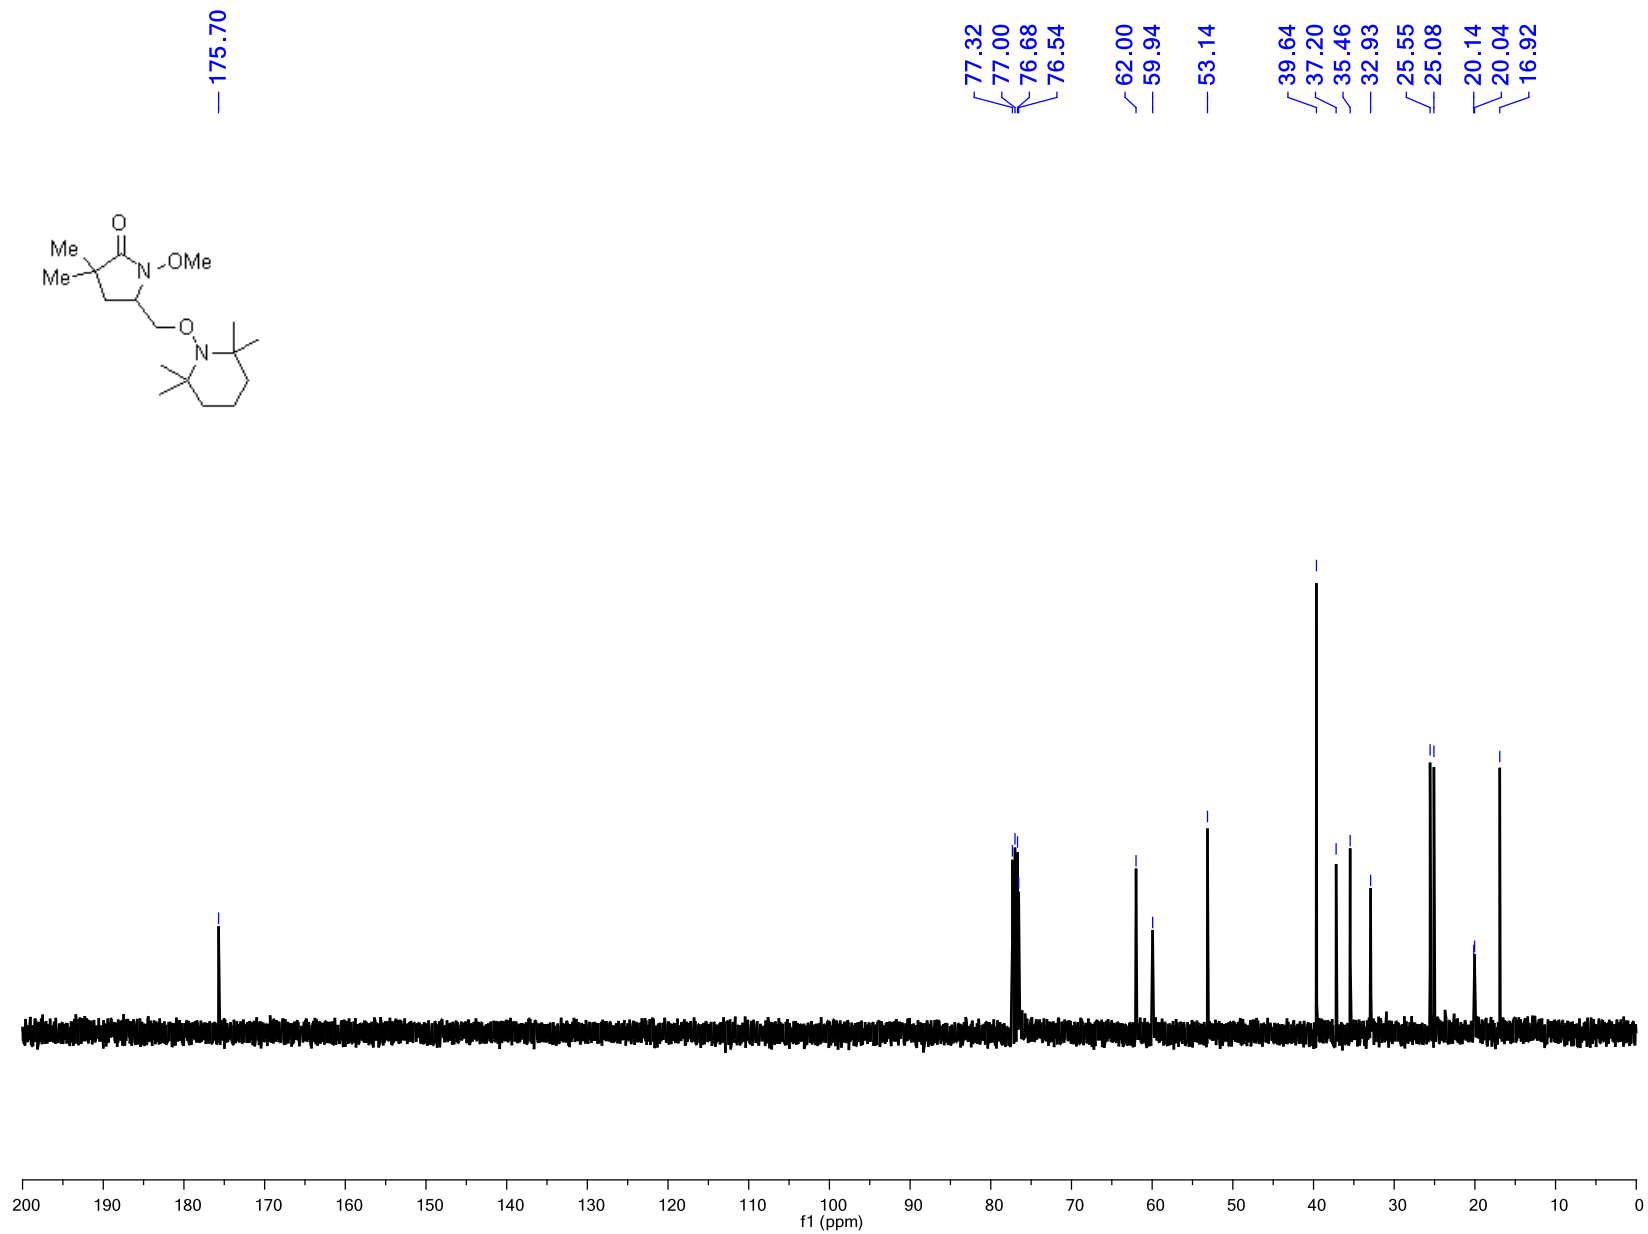

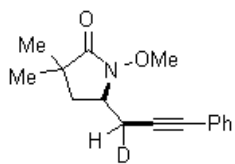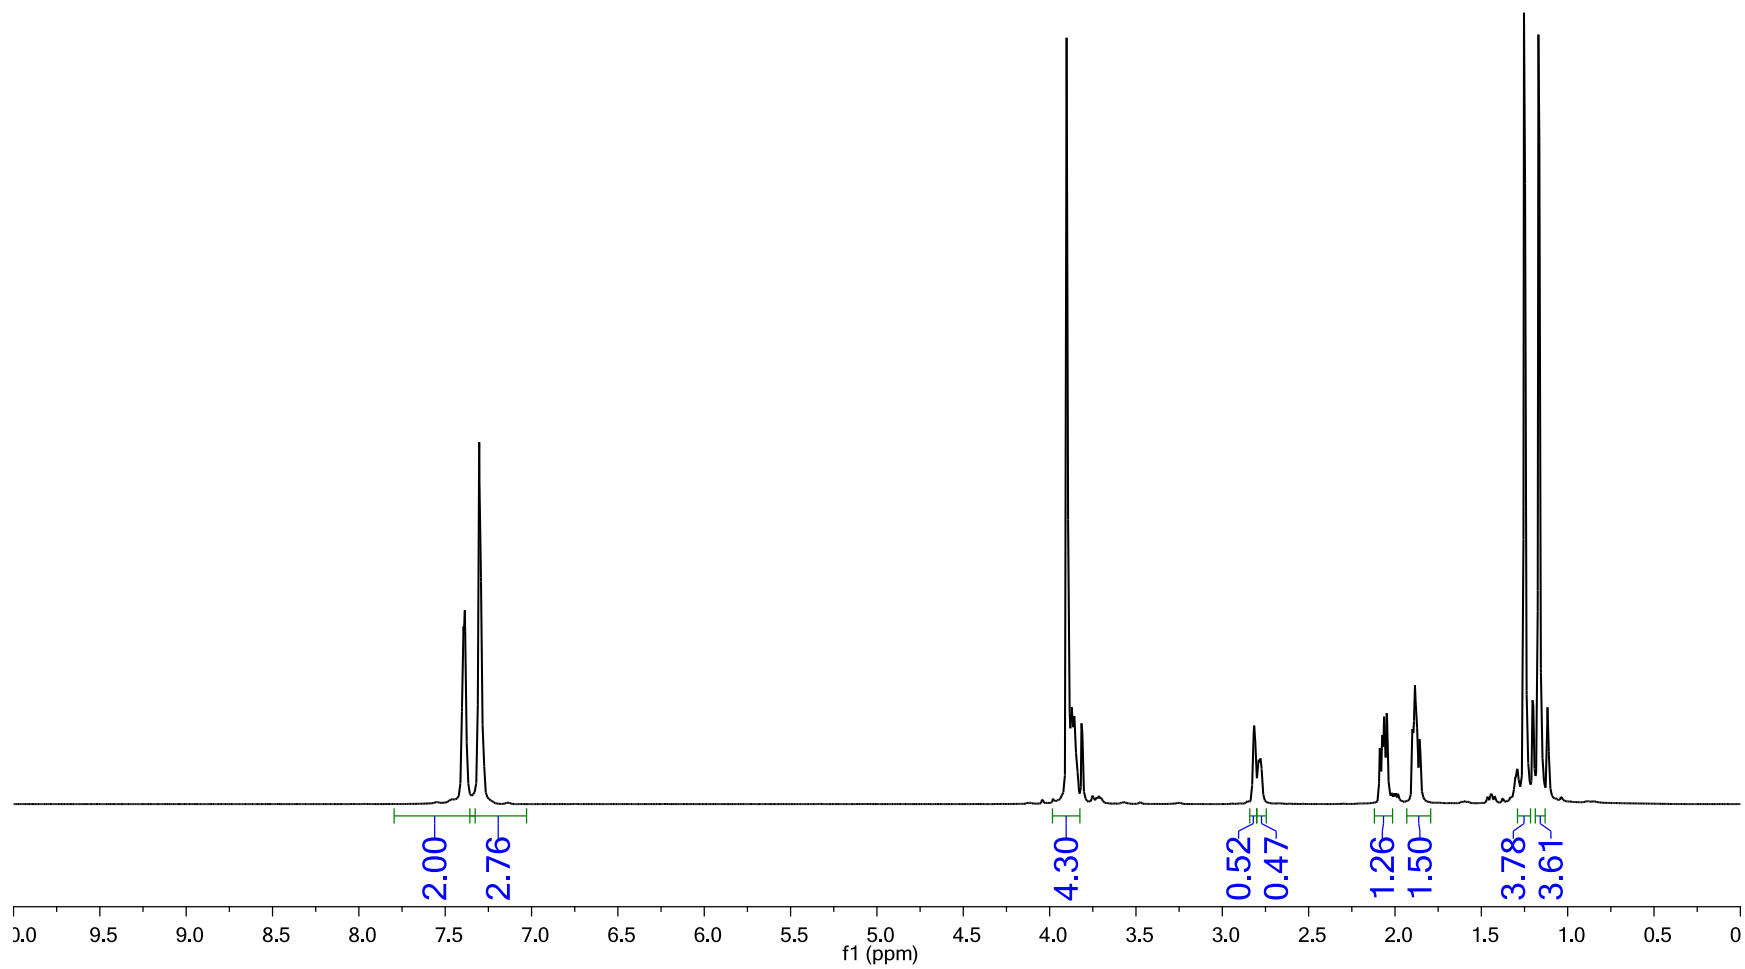

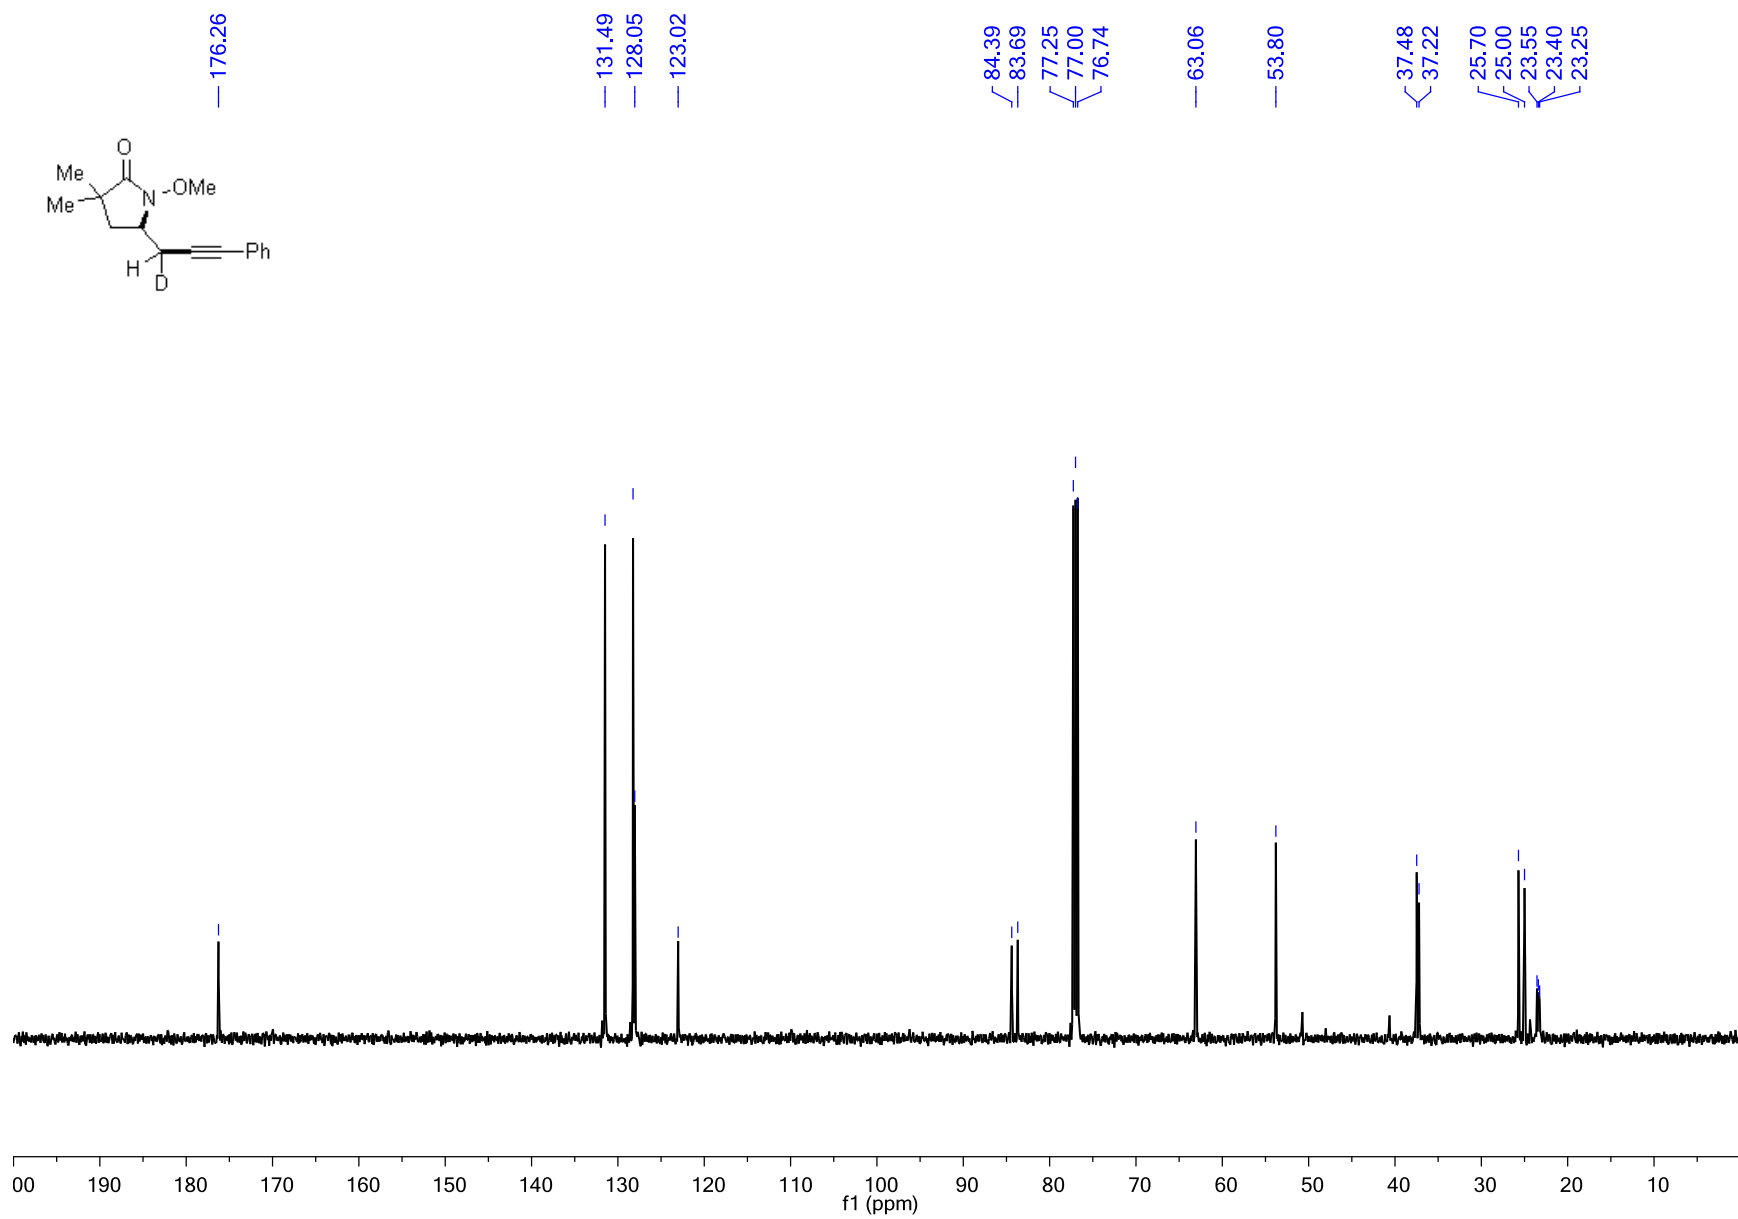

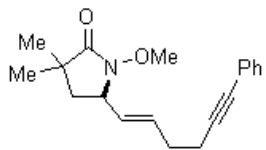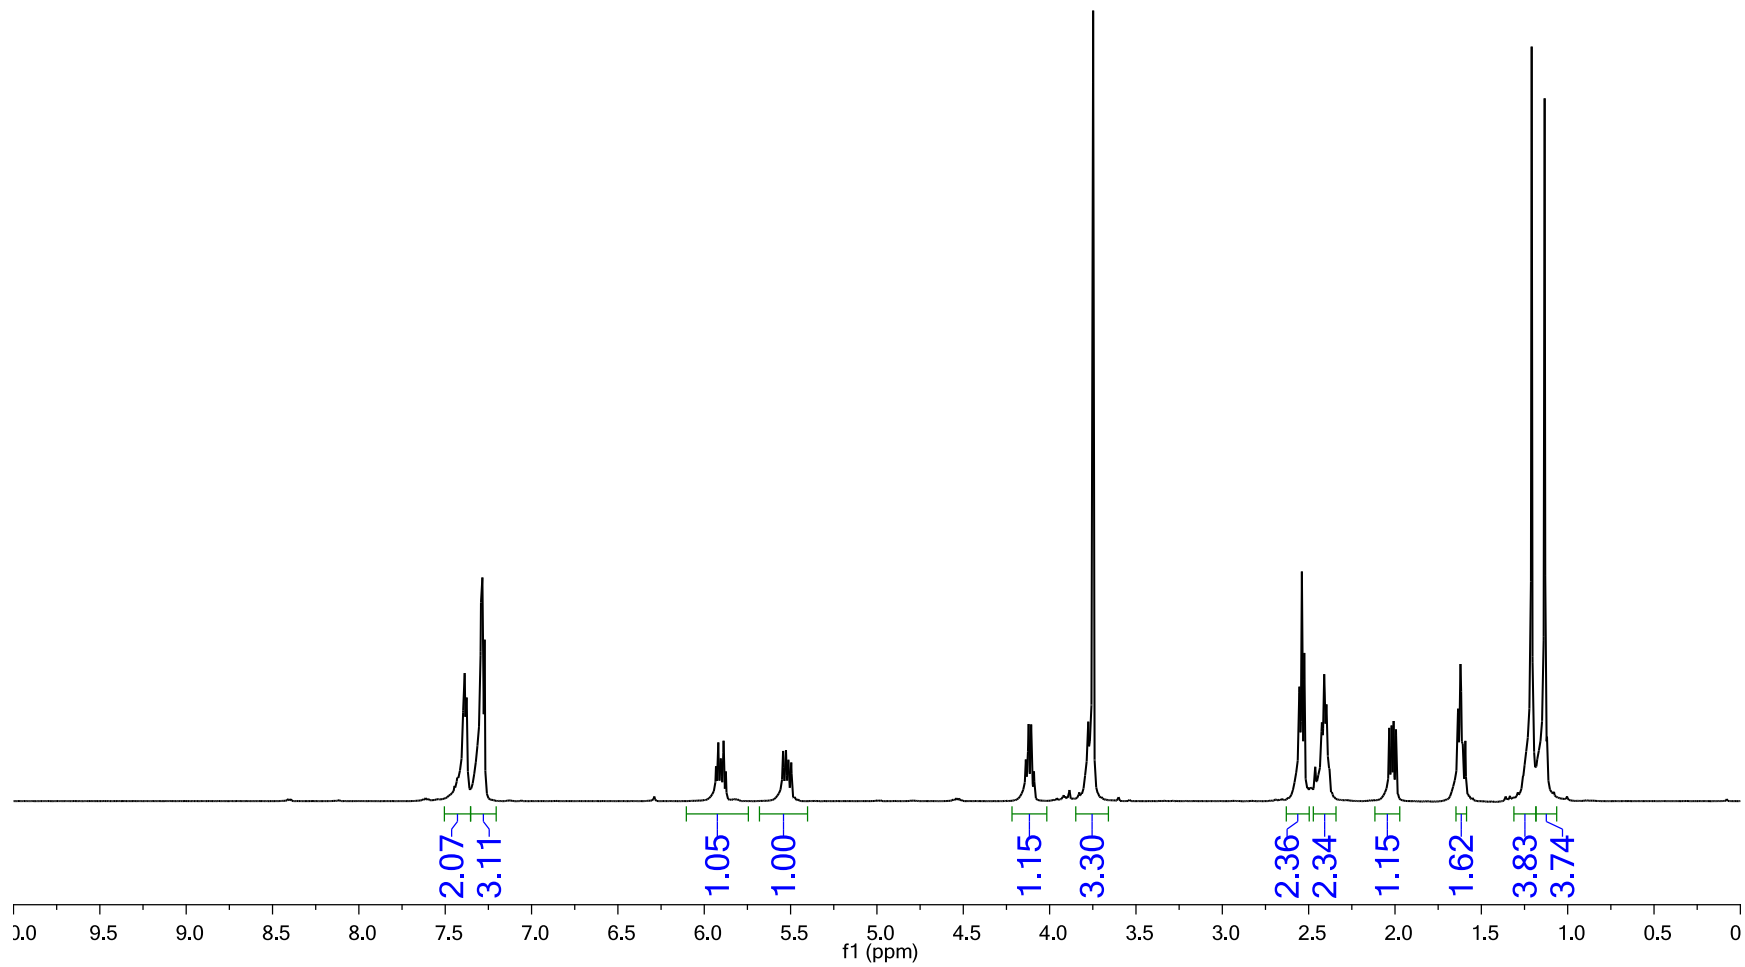



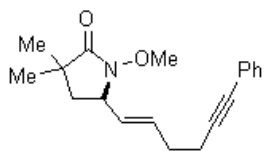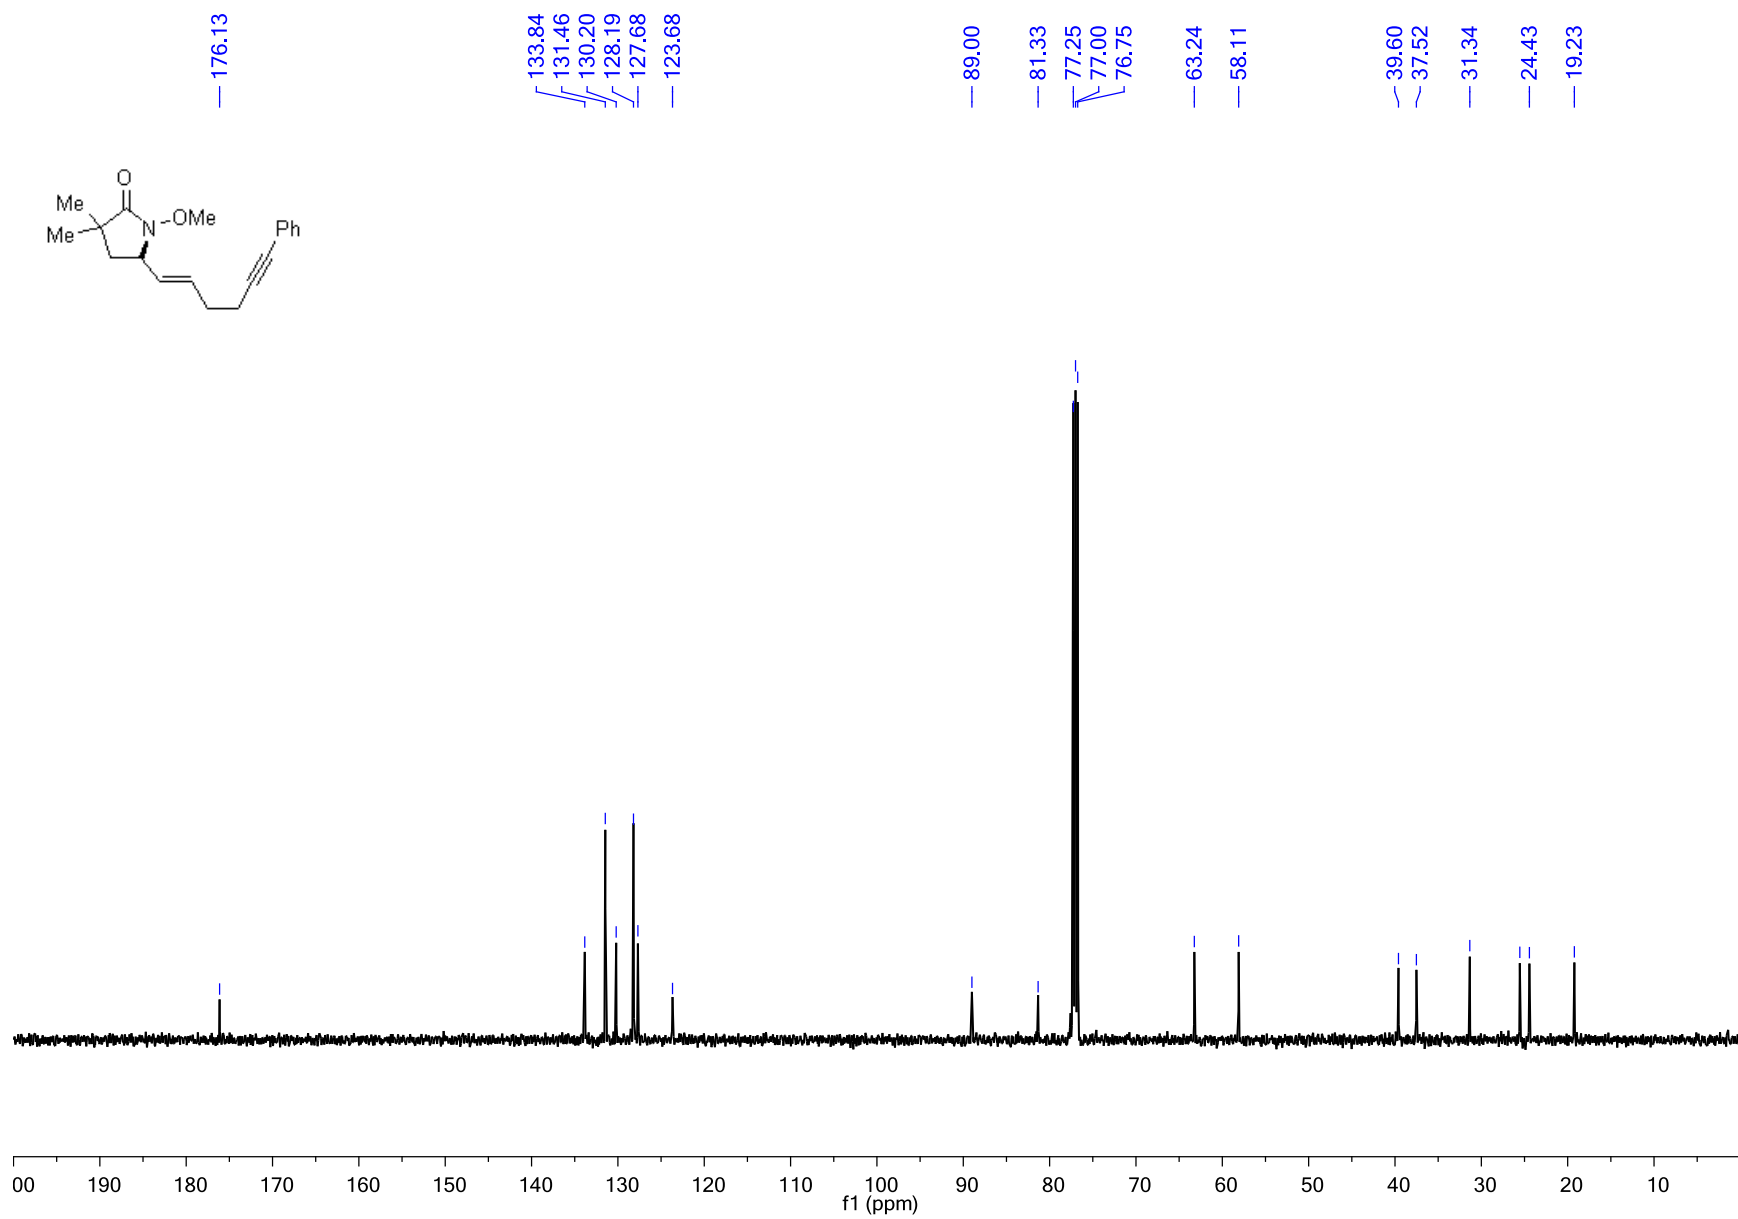

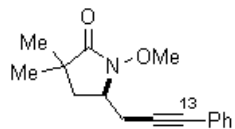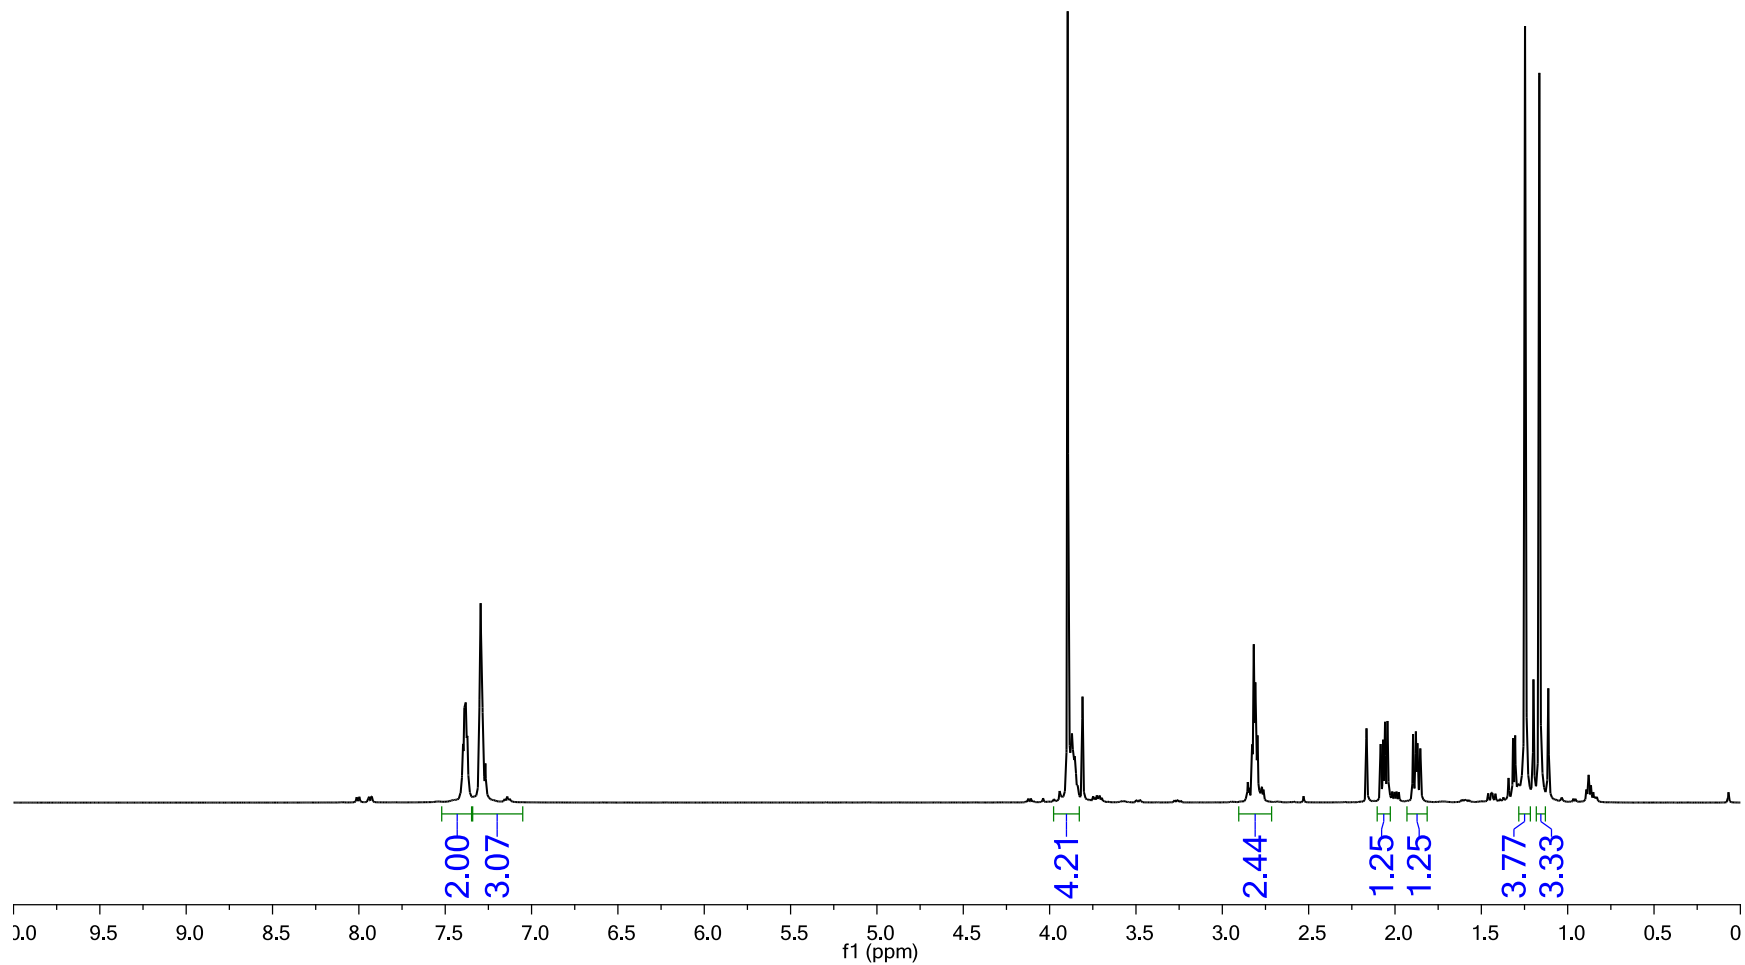

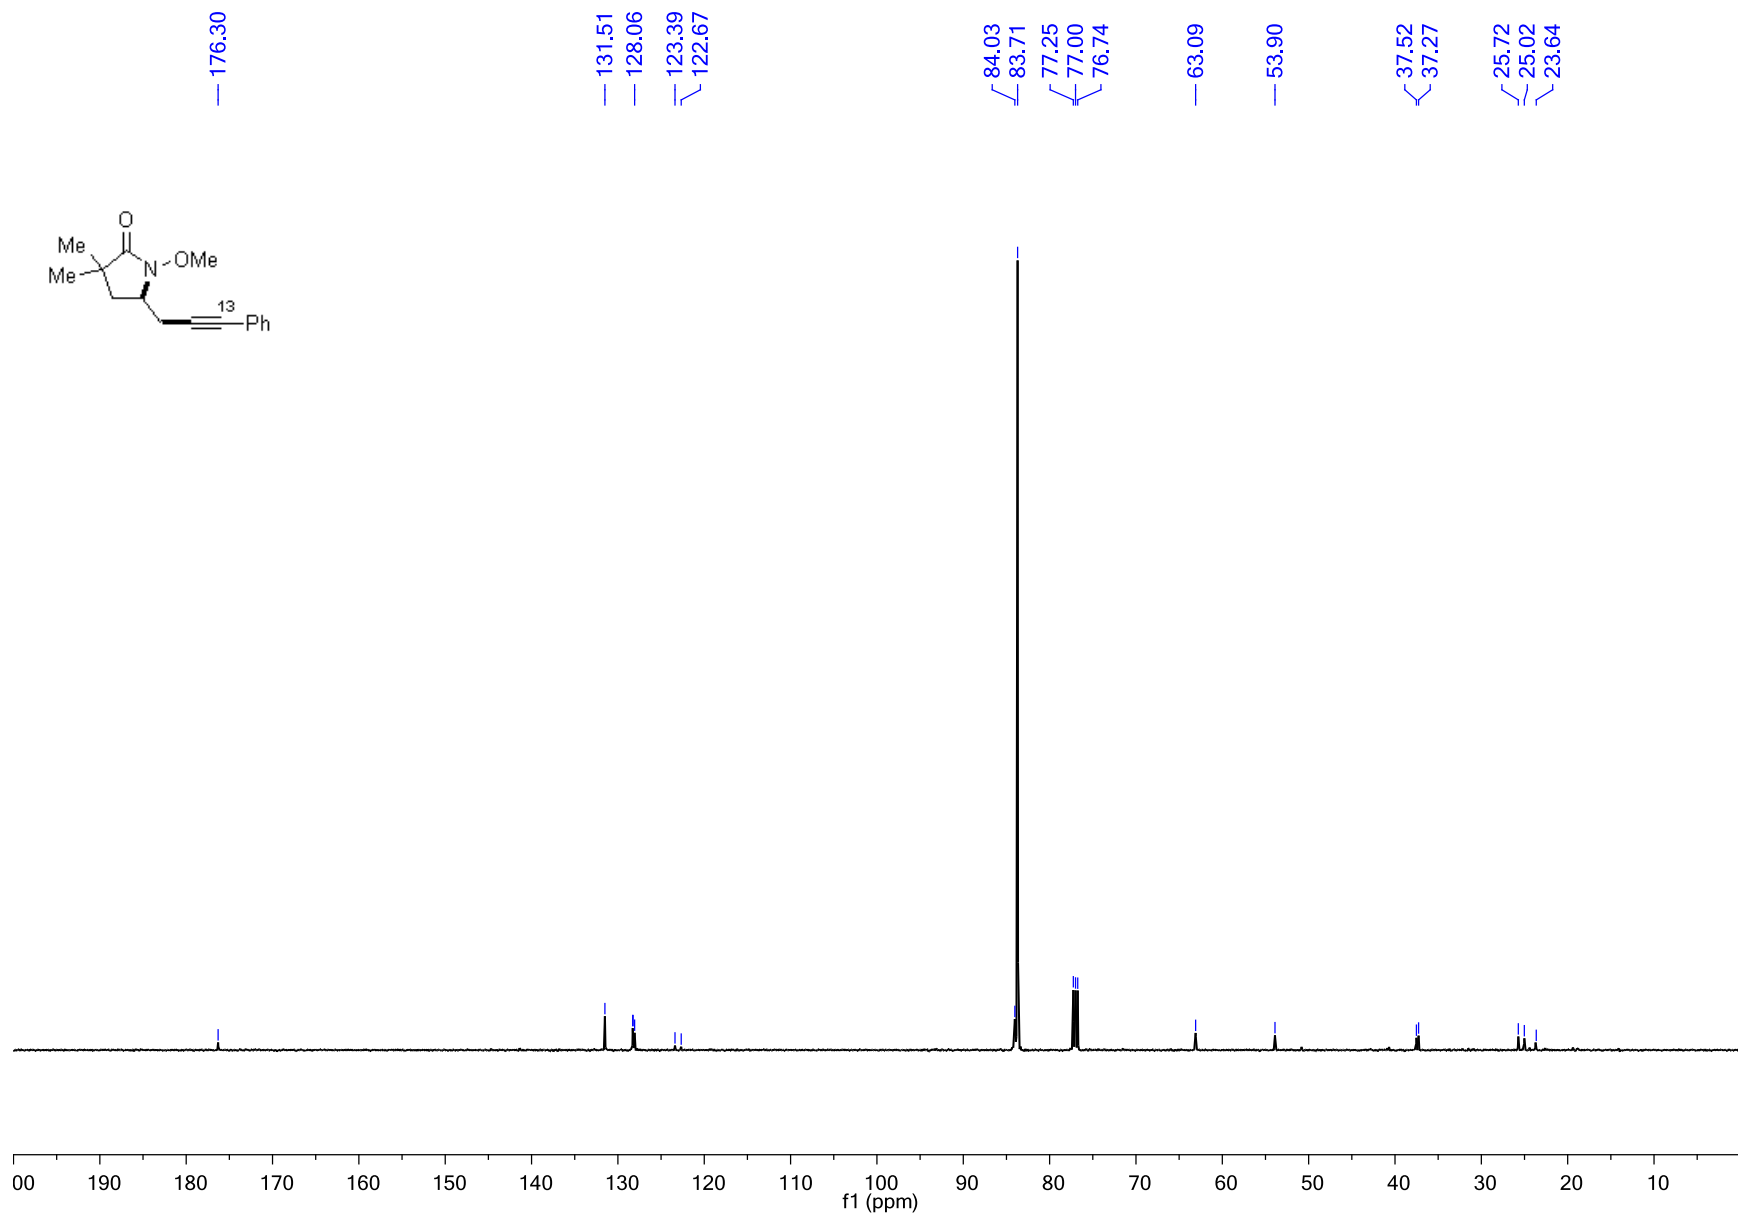

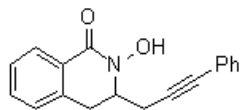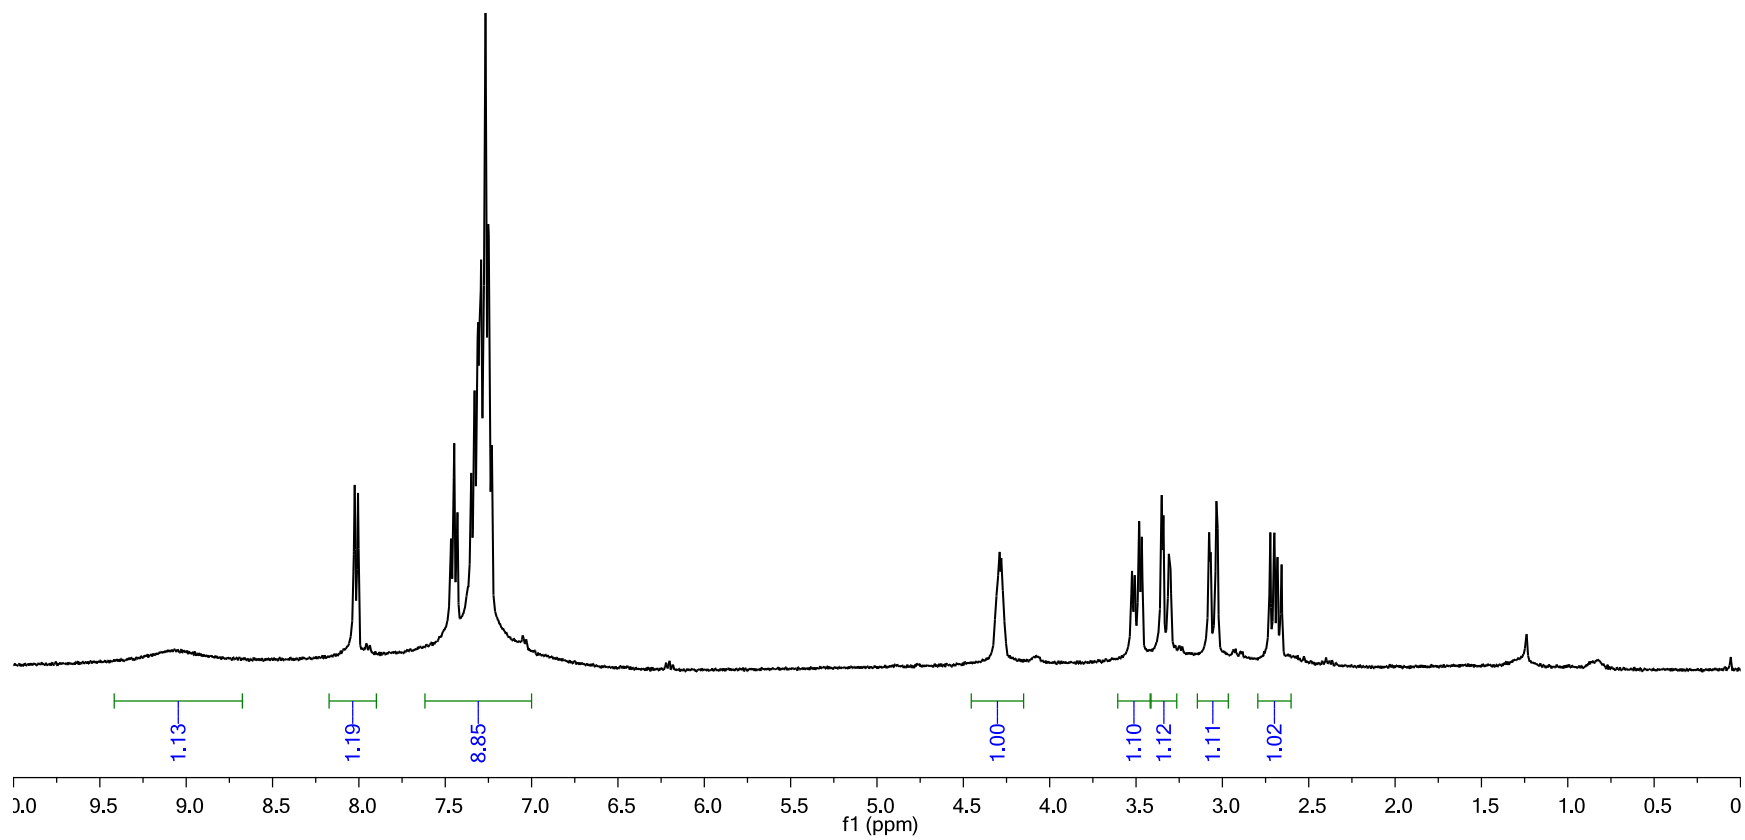

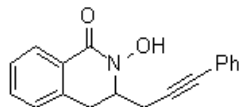

— 161.669

— 134.955

— 132.490

— 131.582

— 126.500

— 123.038

— 84.968

— 83.539

— 77.254

— 77.000

— 76.746

— 57.895

— 31.727

— 22.035

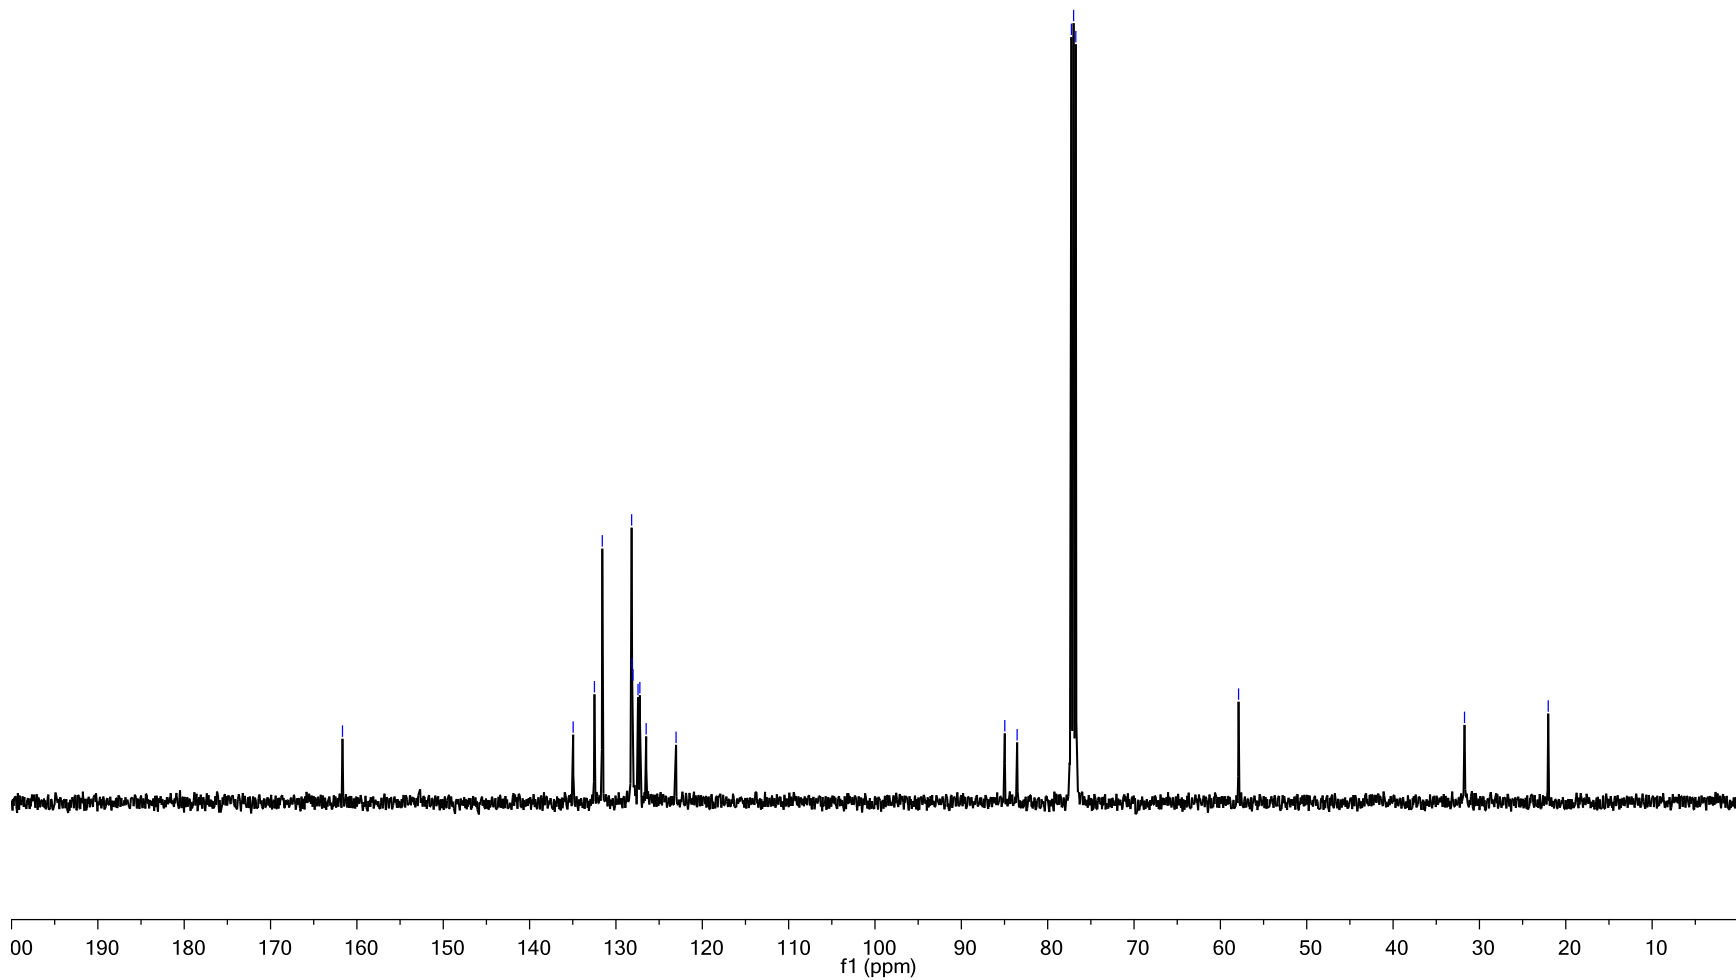

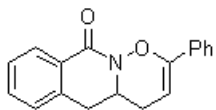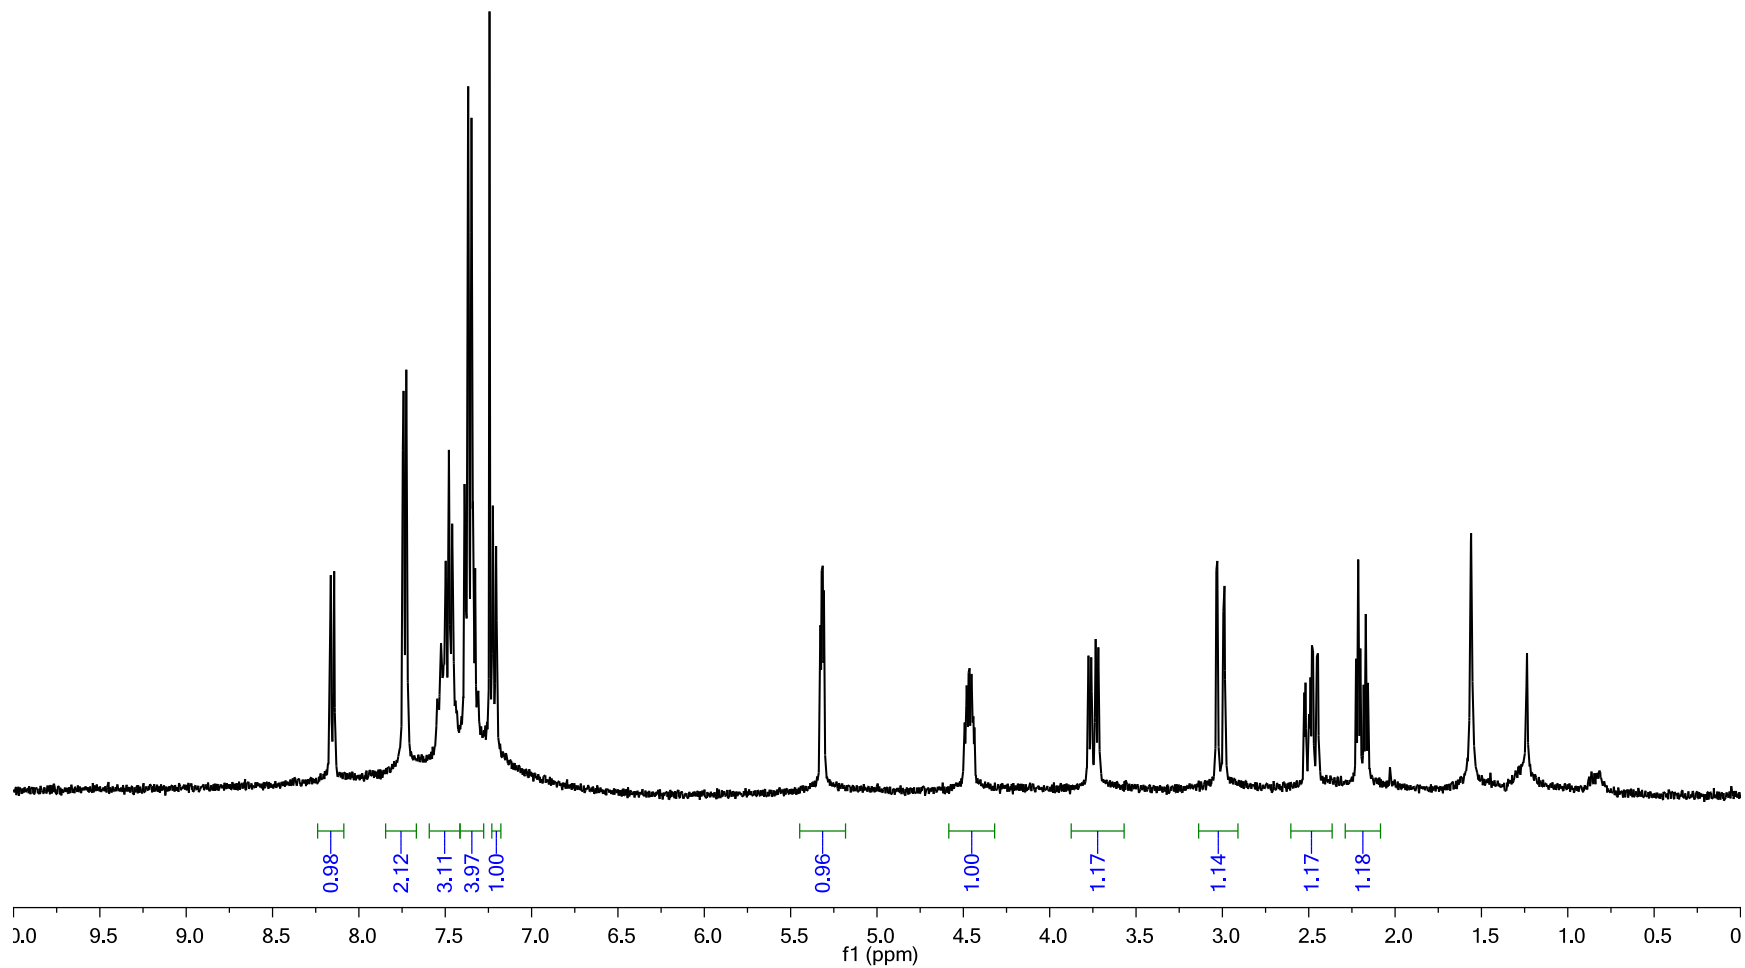

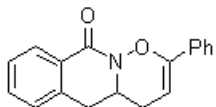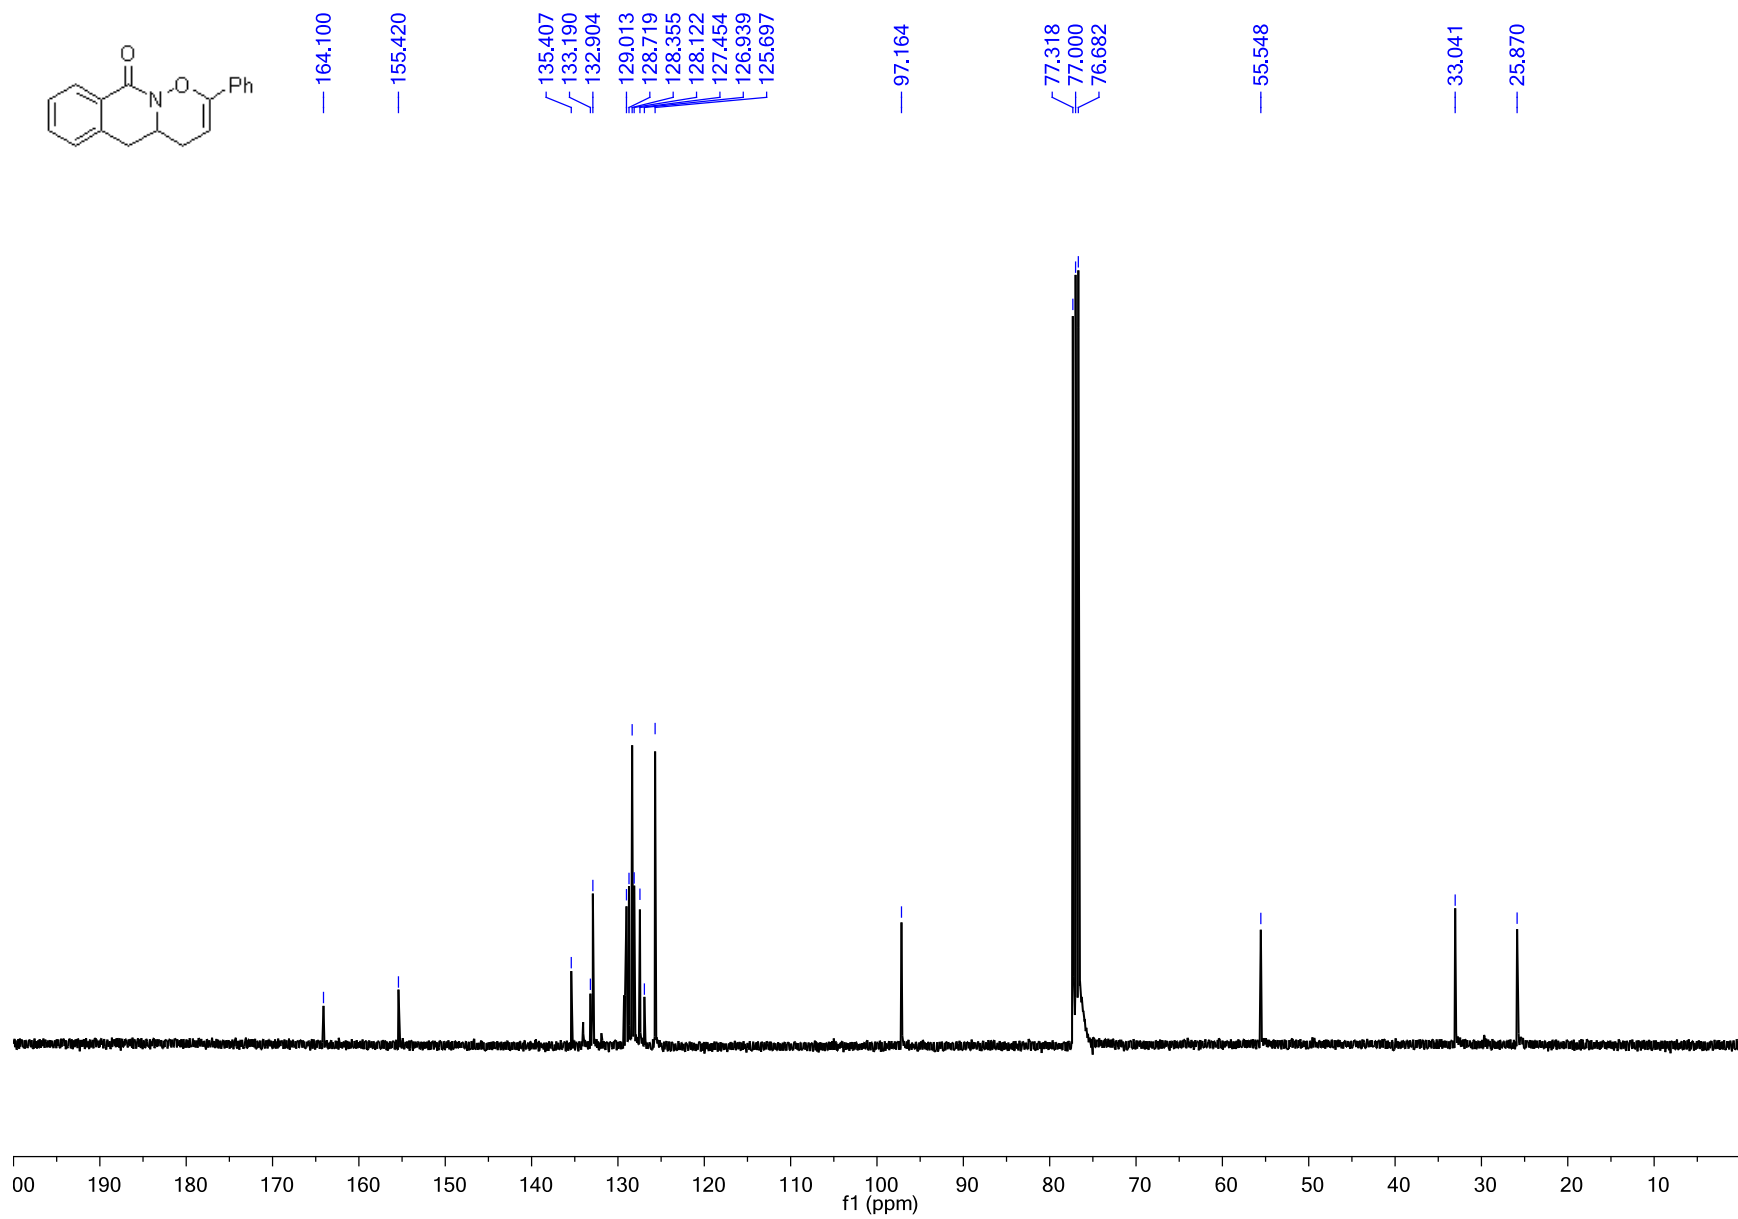

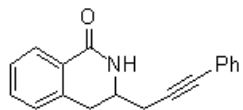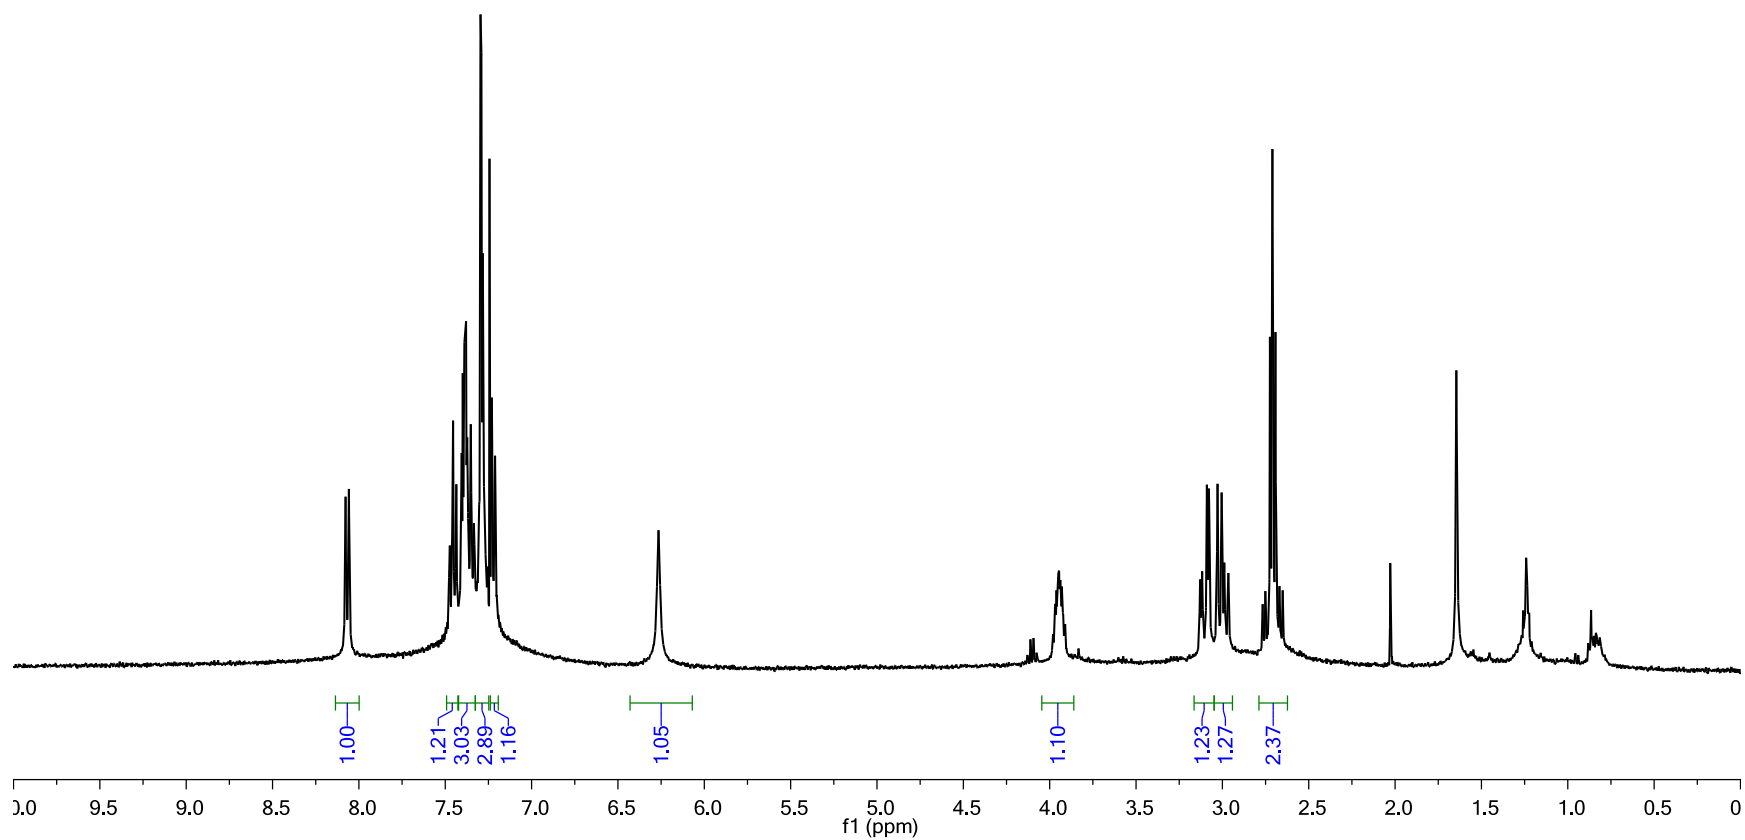



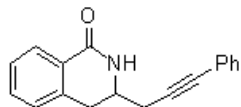

— 165.822

— 137.141

— 131.677

— 127.266

— 122.781

∟ 84.426

∟ 83.927

∟ 77.254

∟ 77.000

∟ 76.746

— 50.374

— 33.710

— 26.339

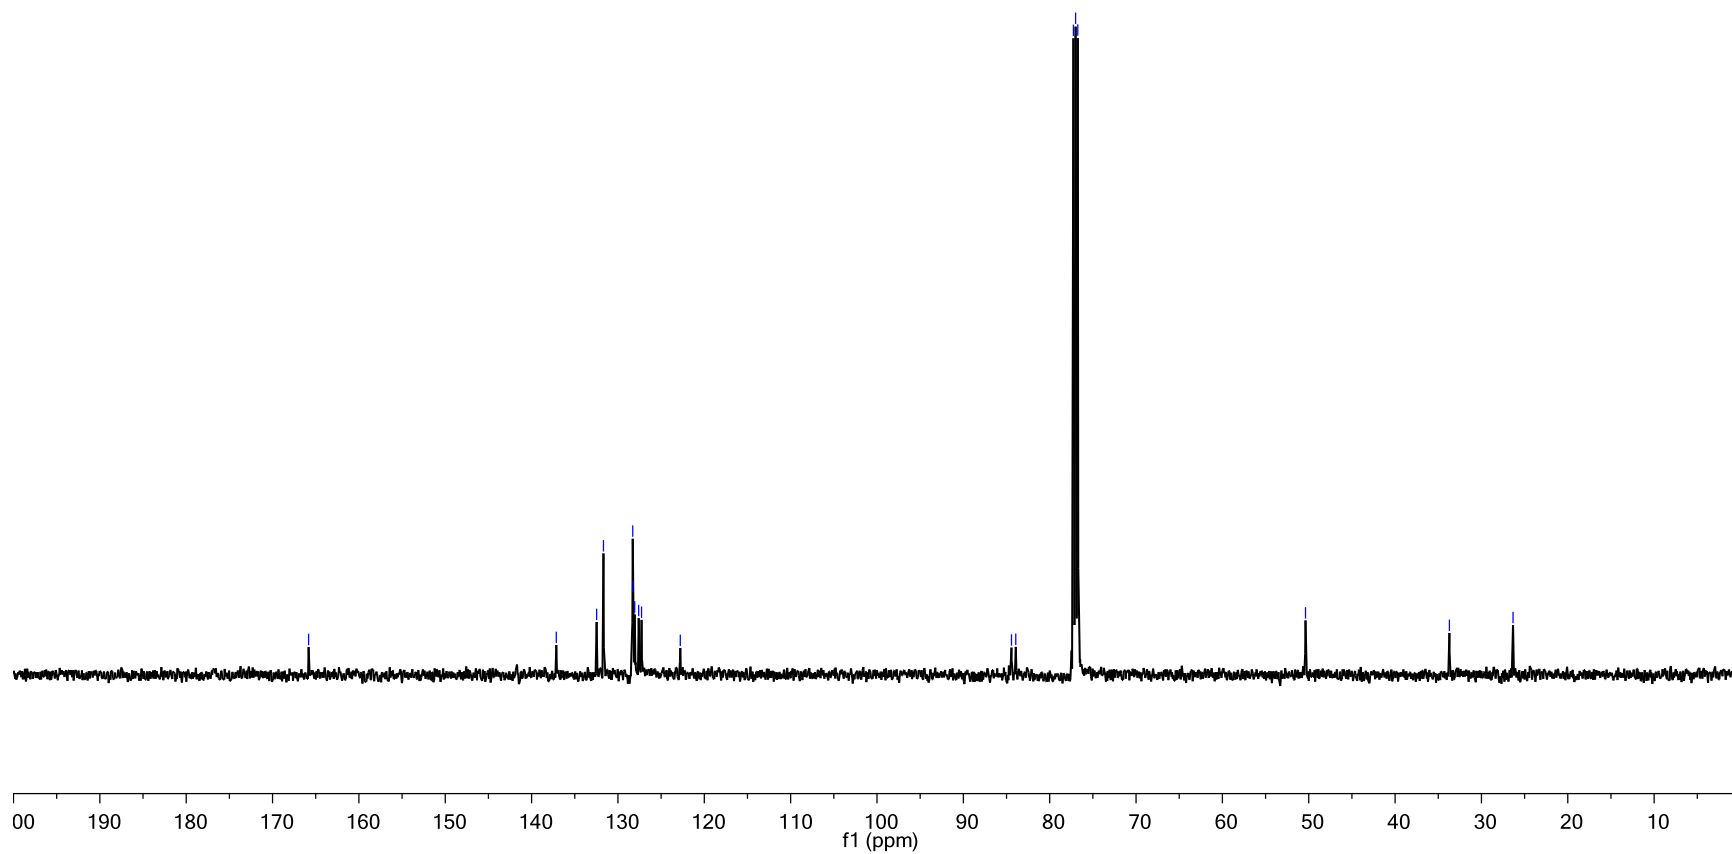

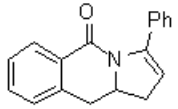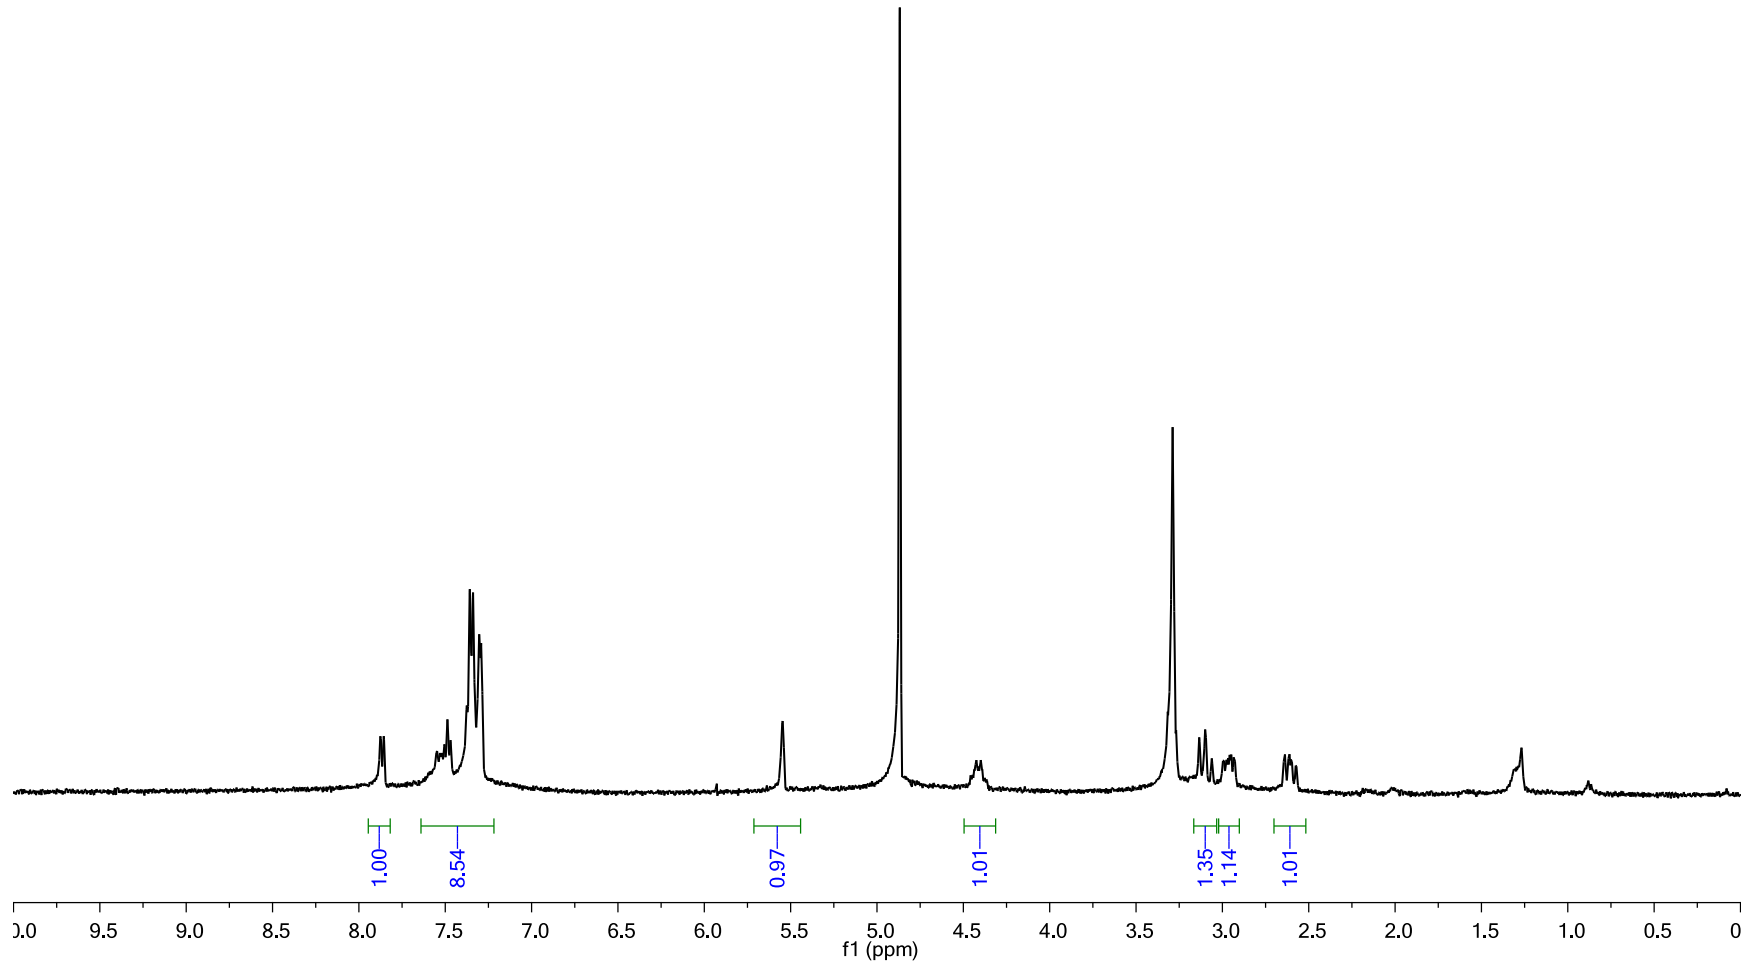

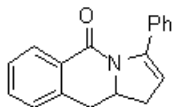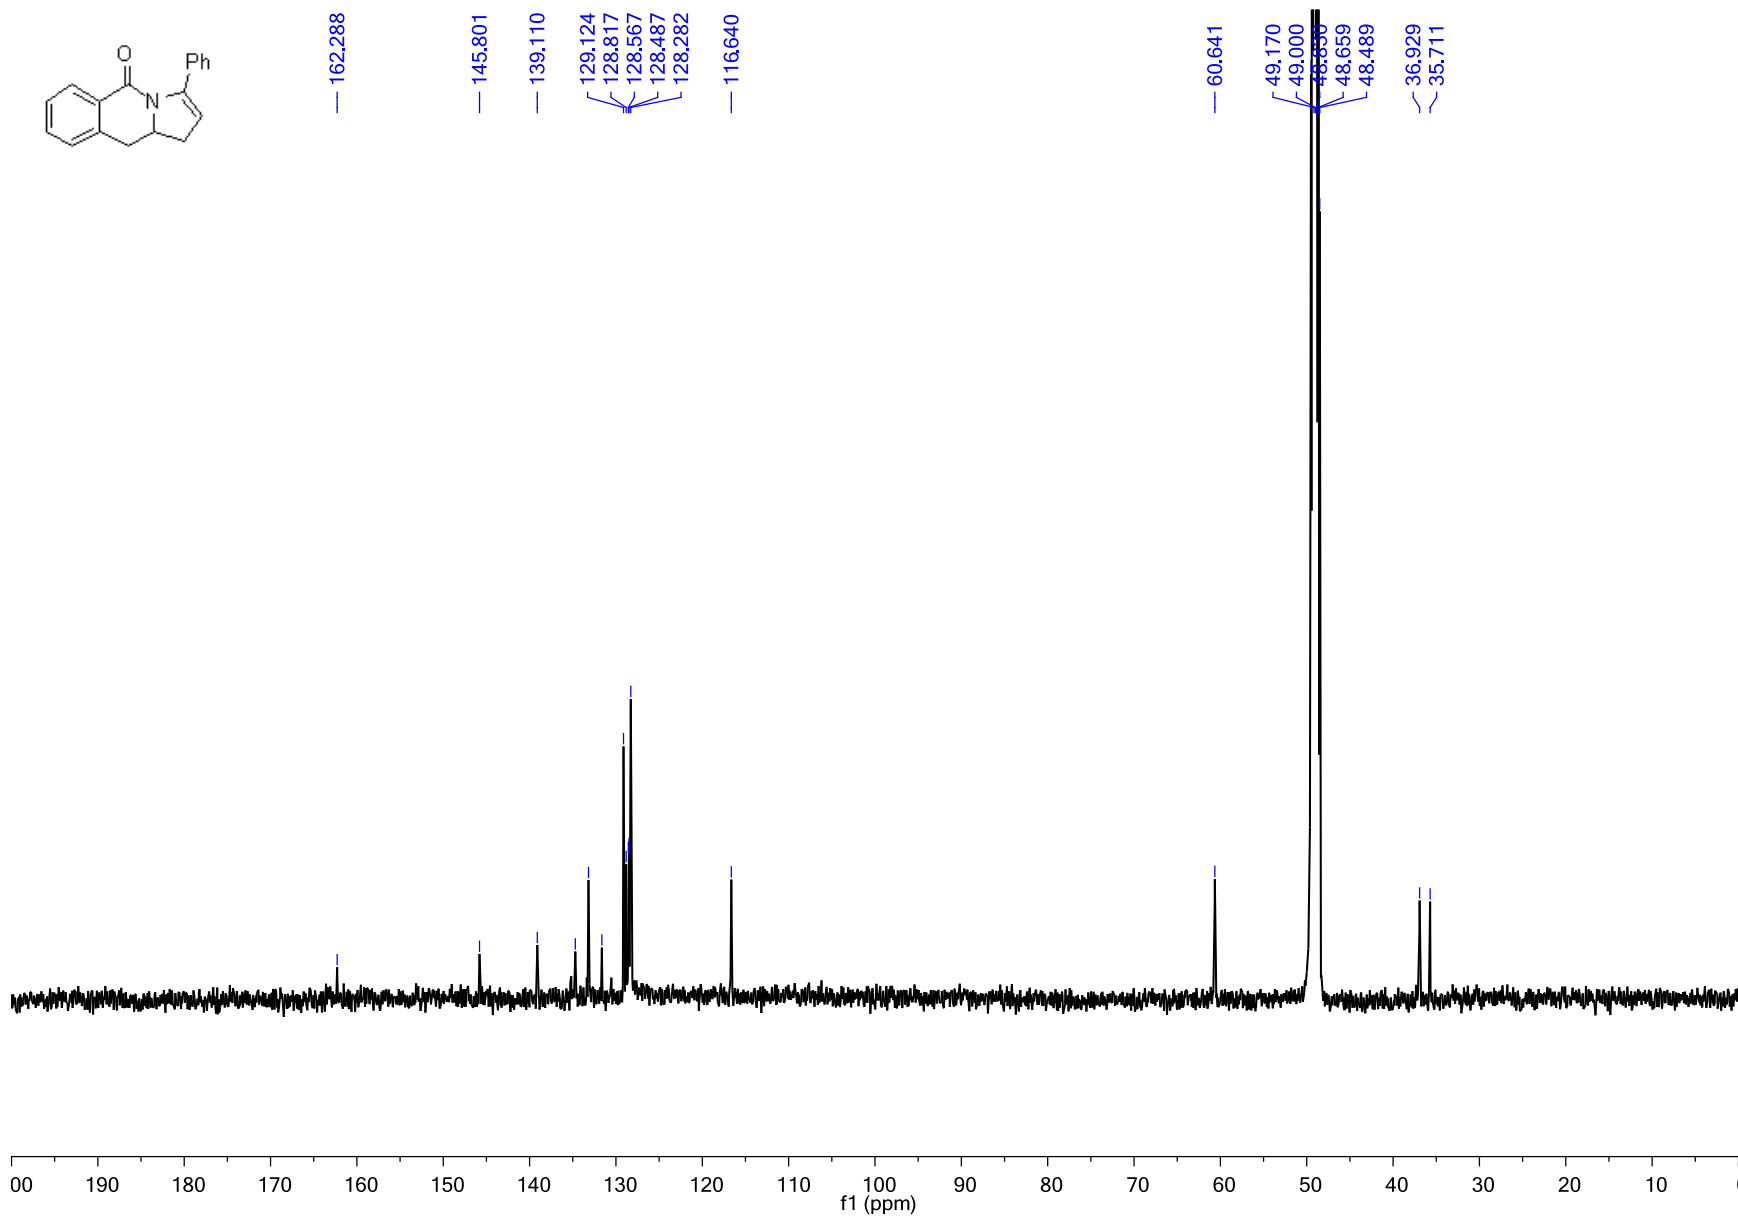

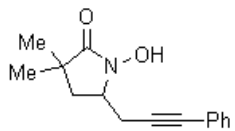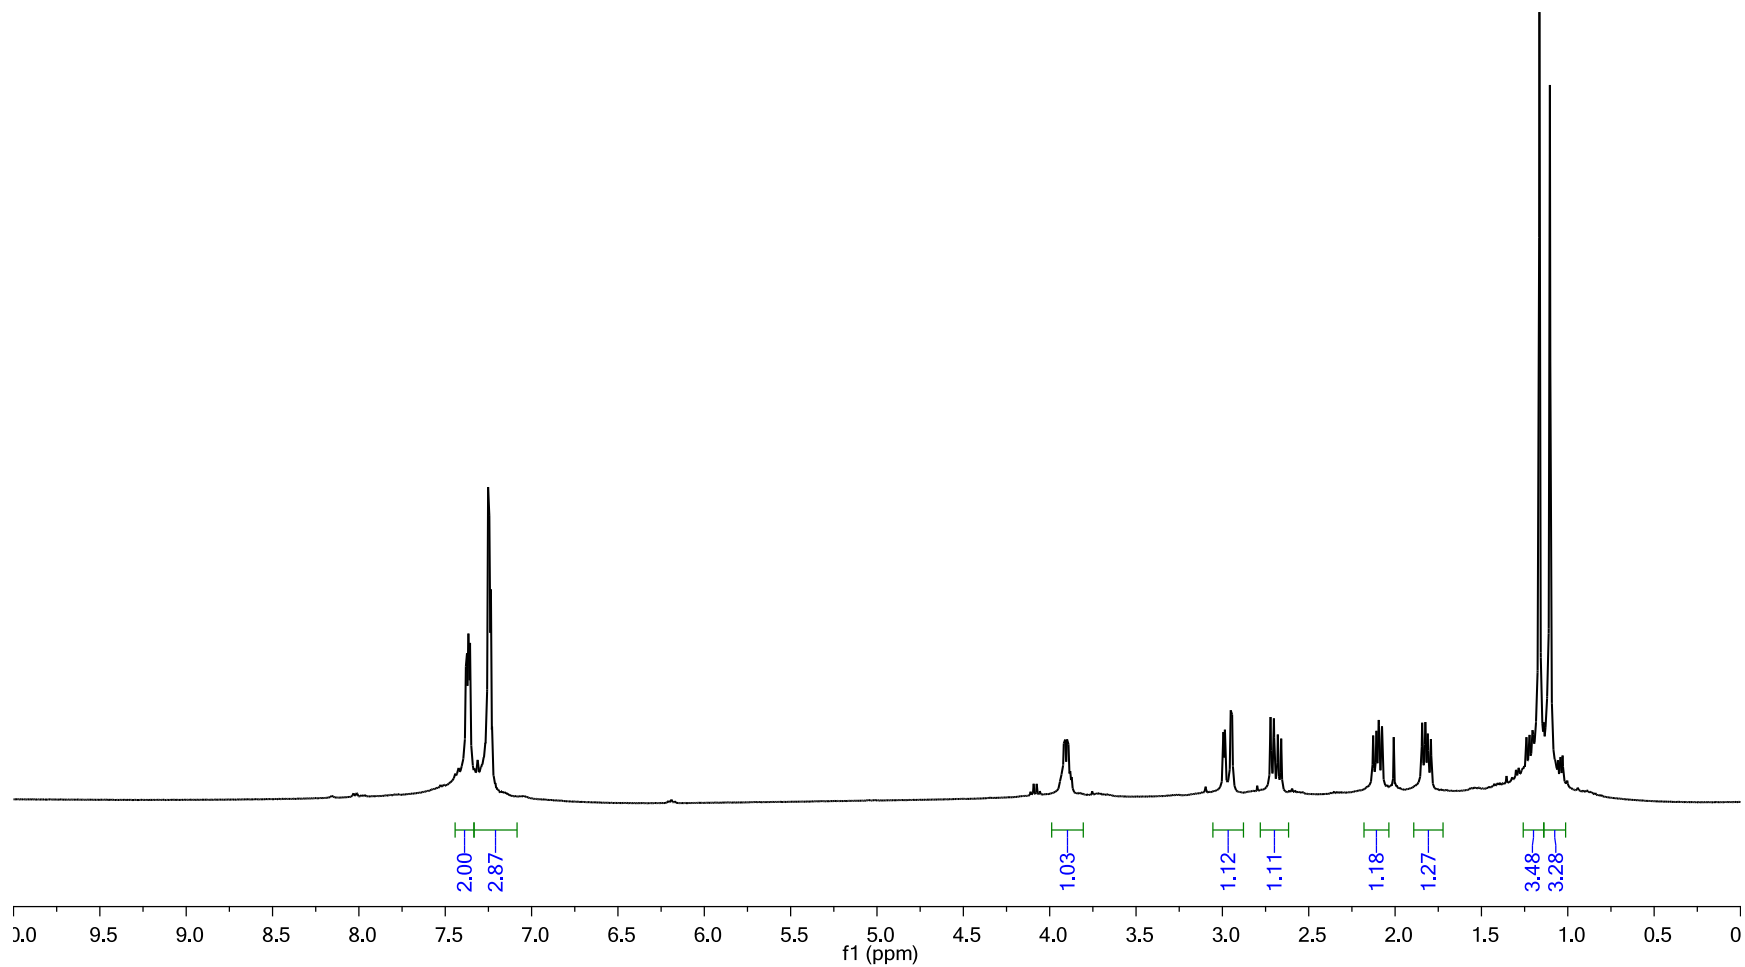

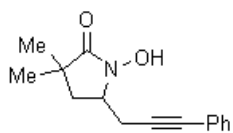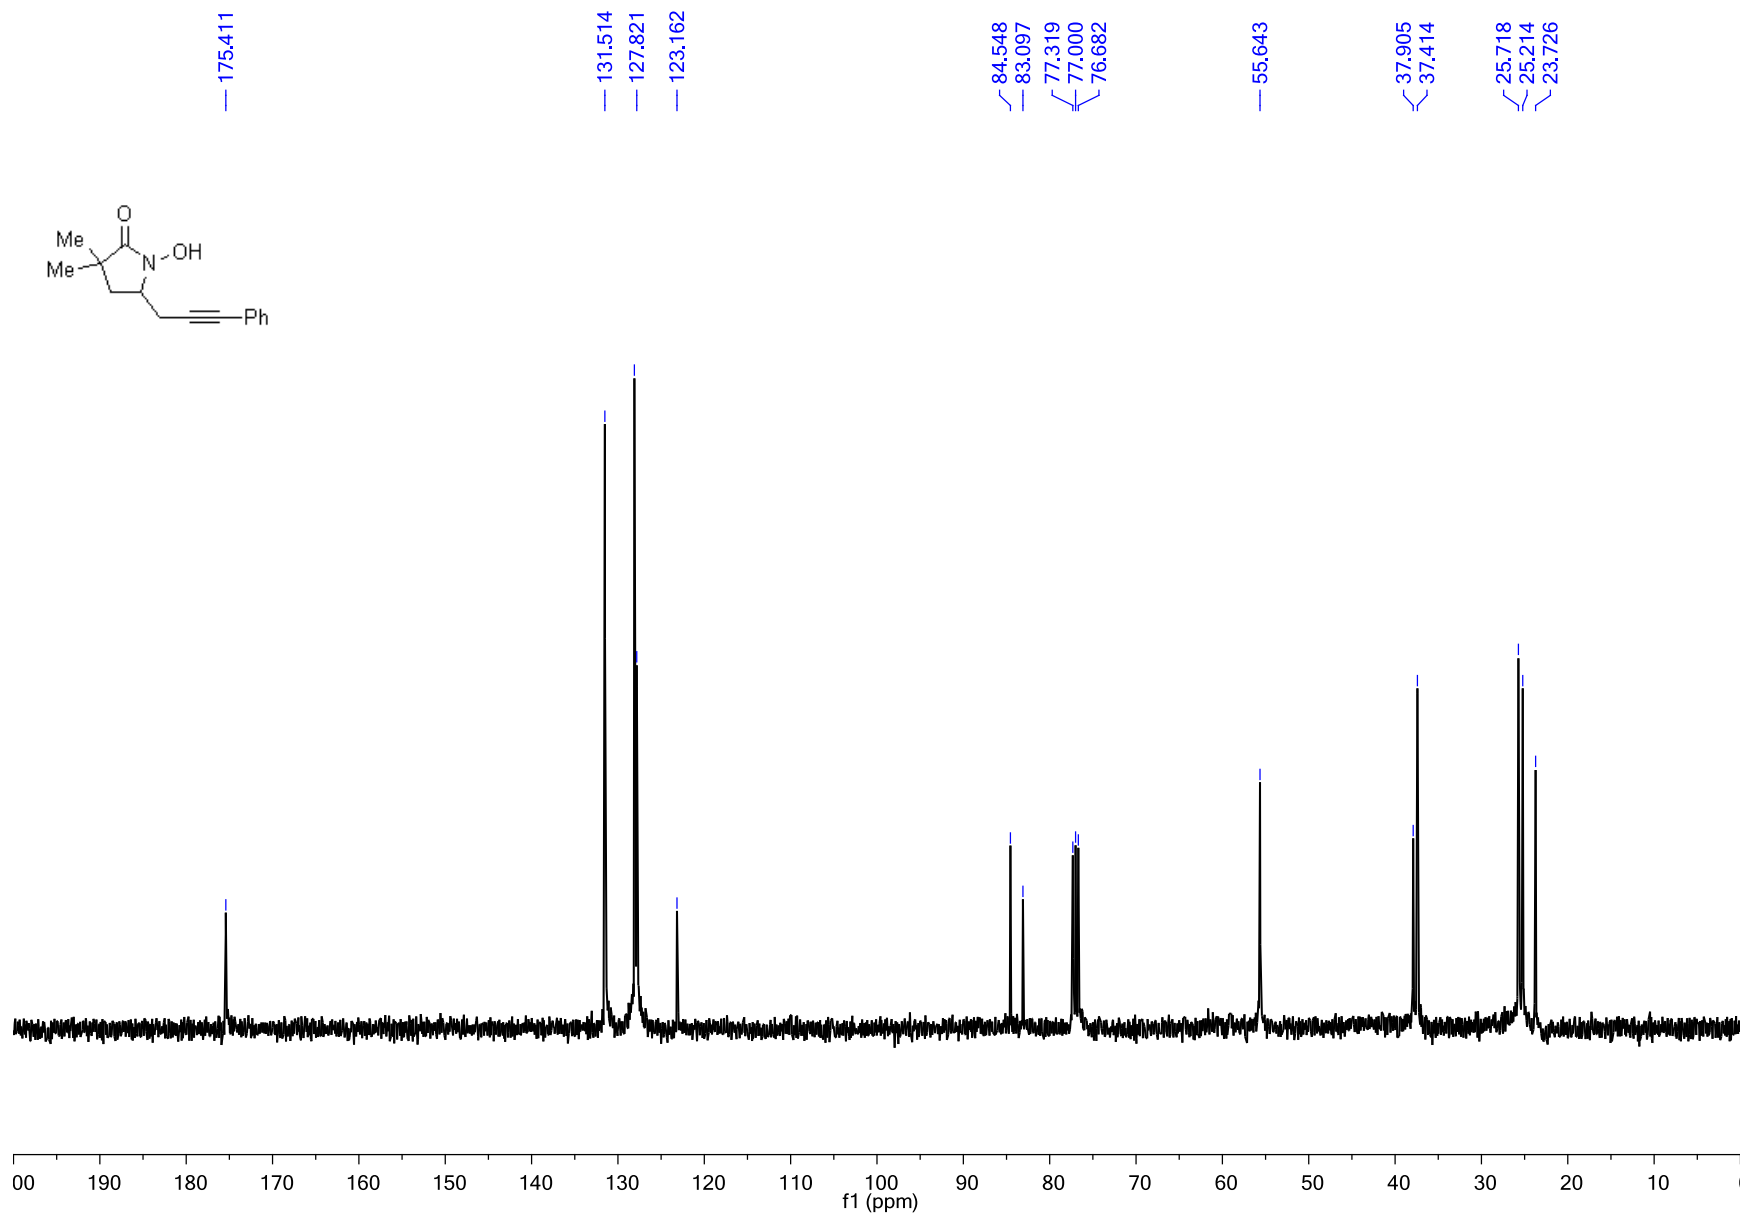

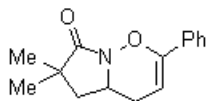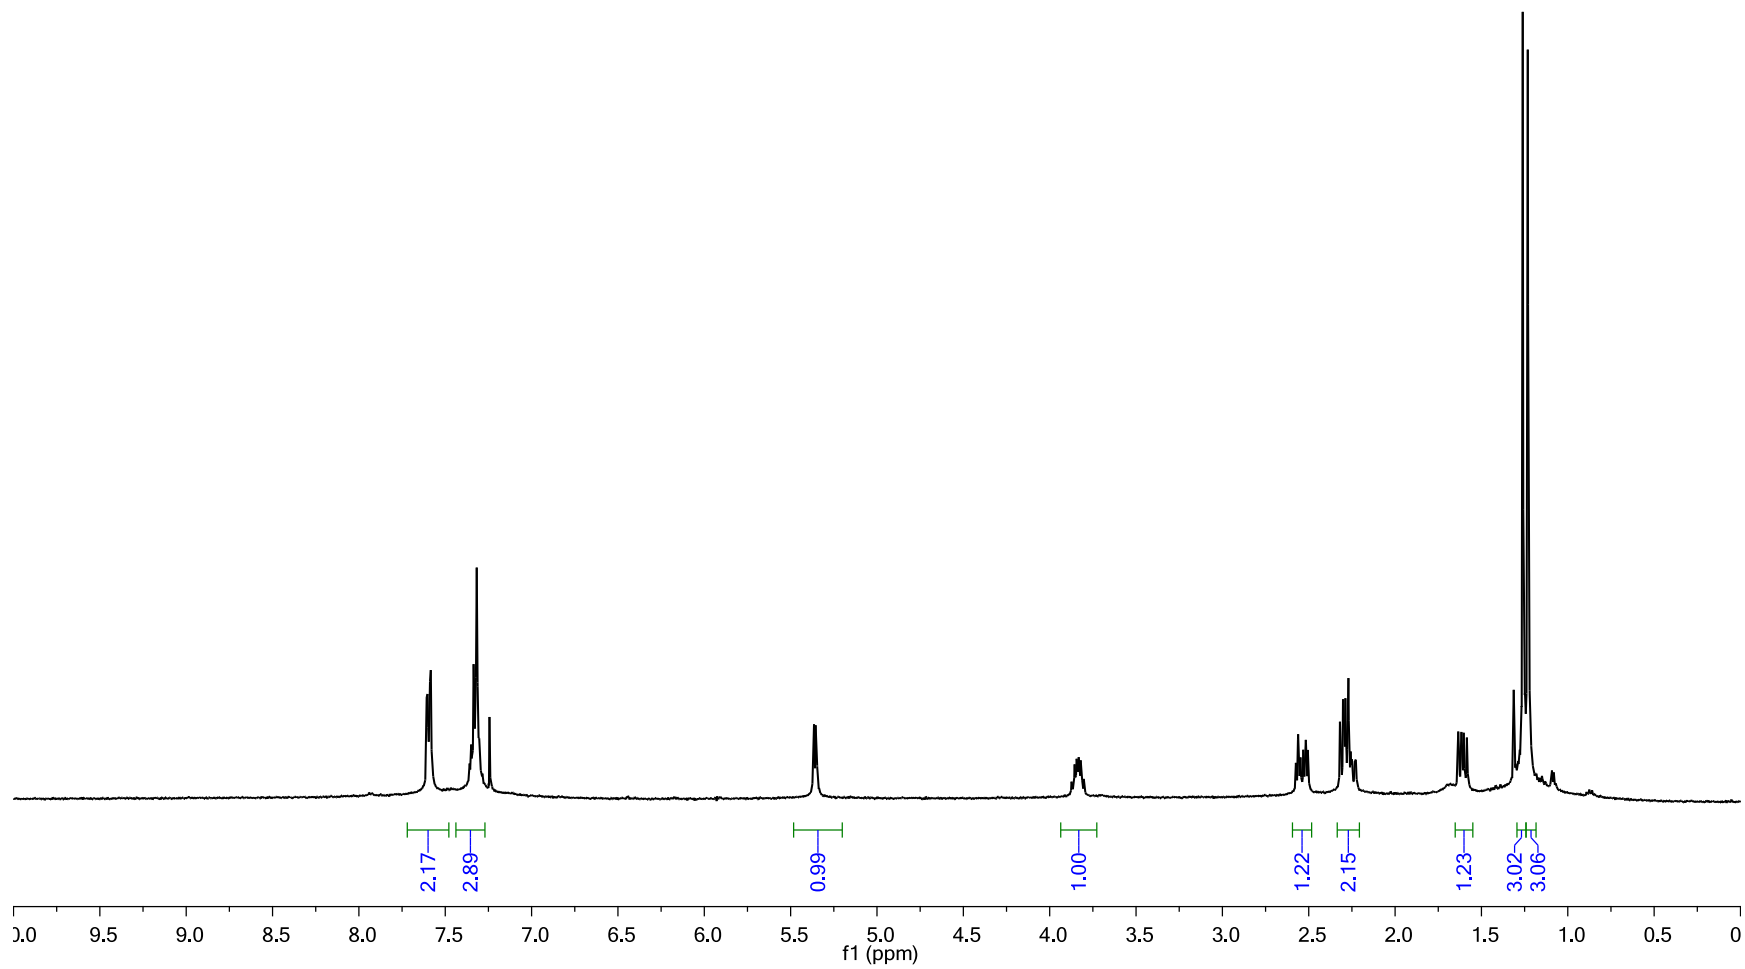

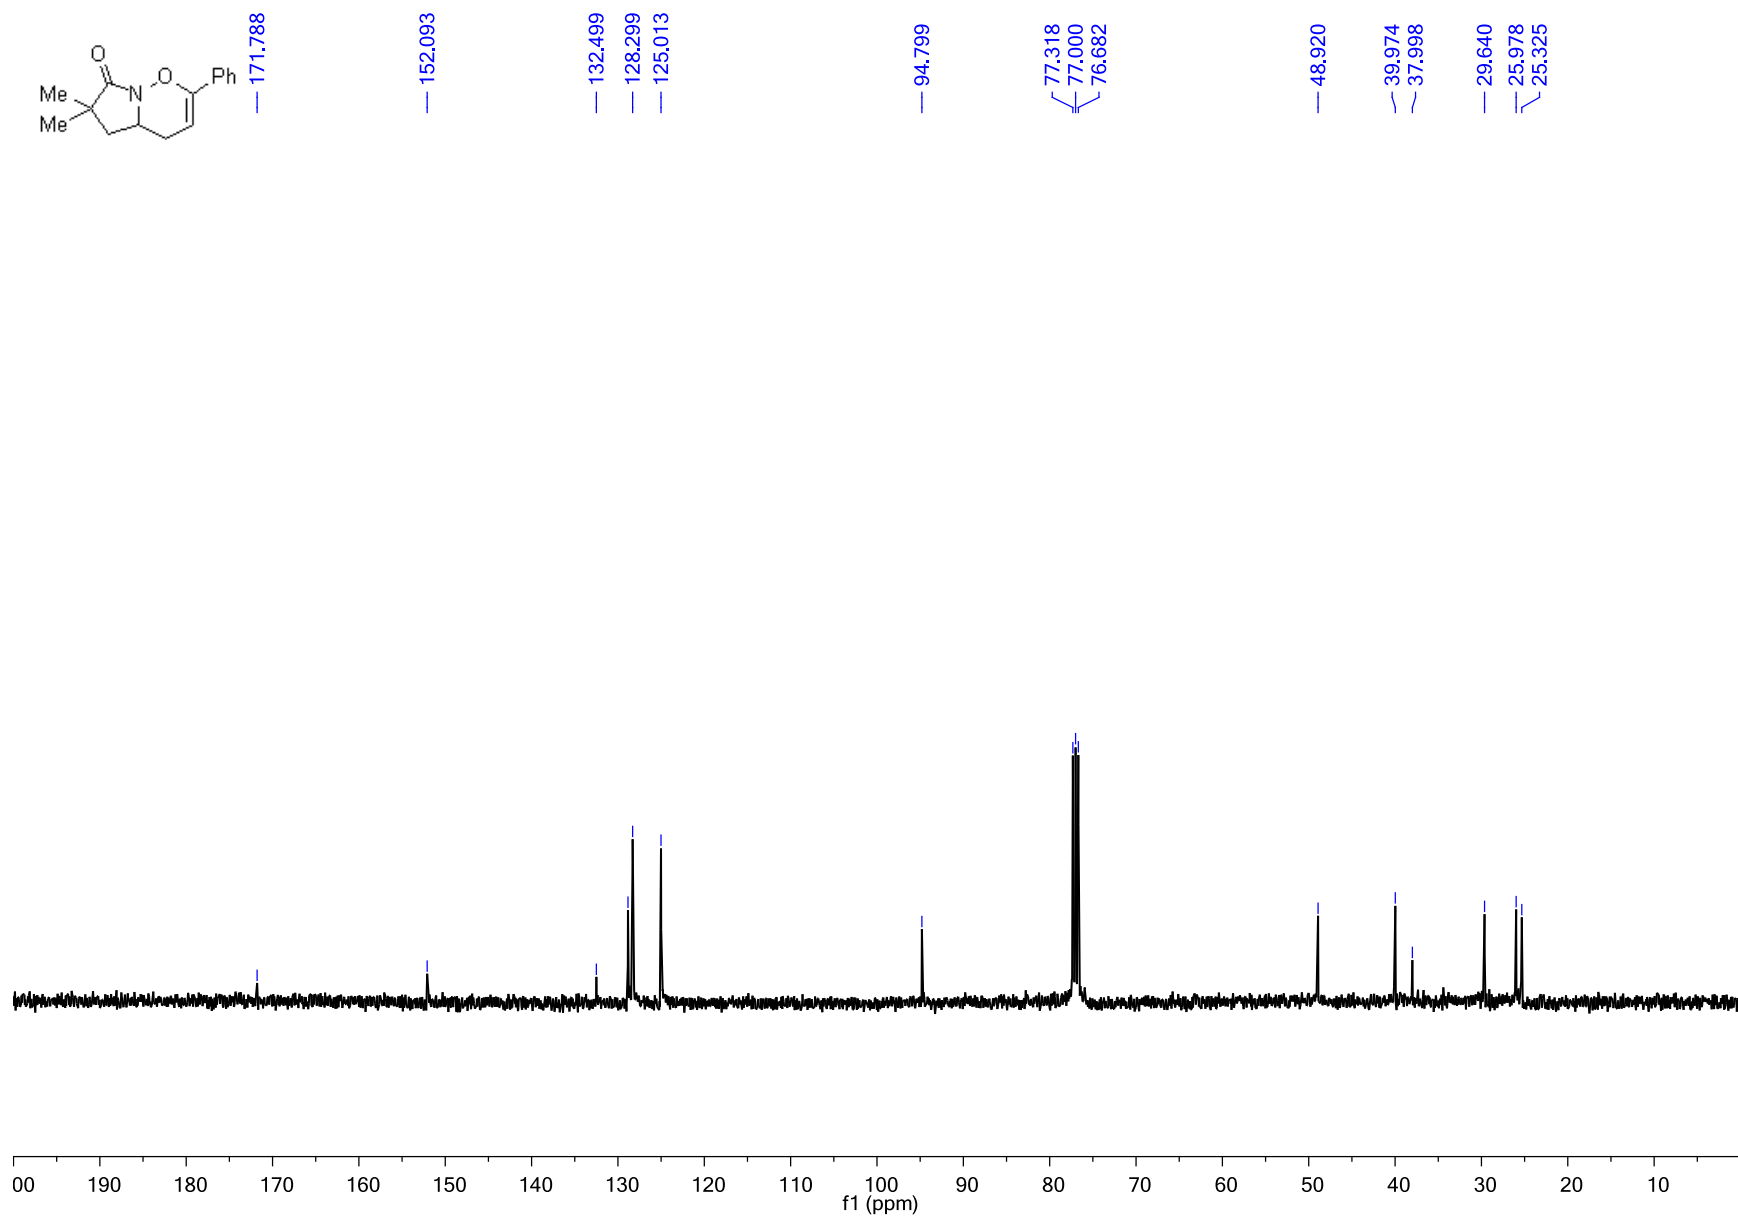

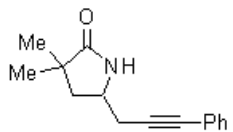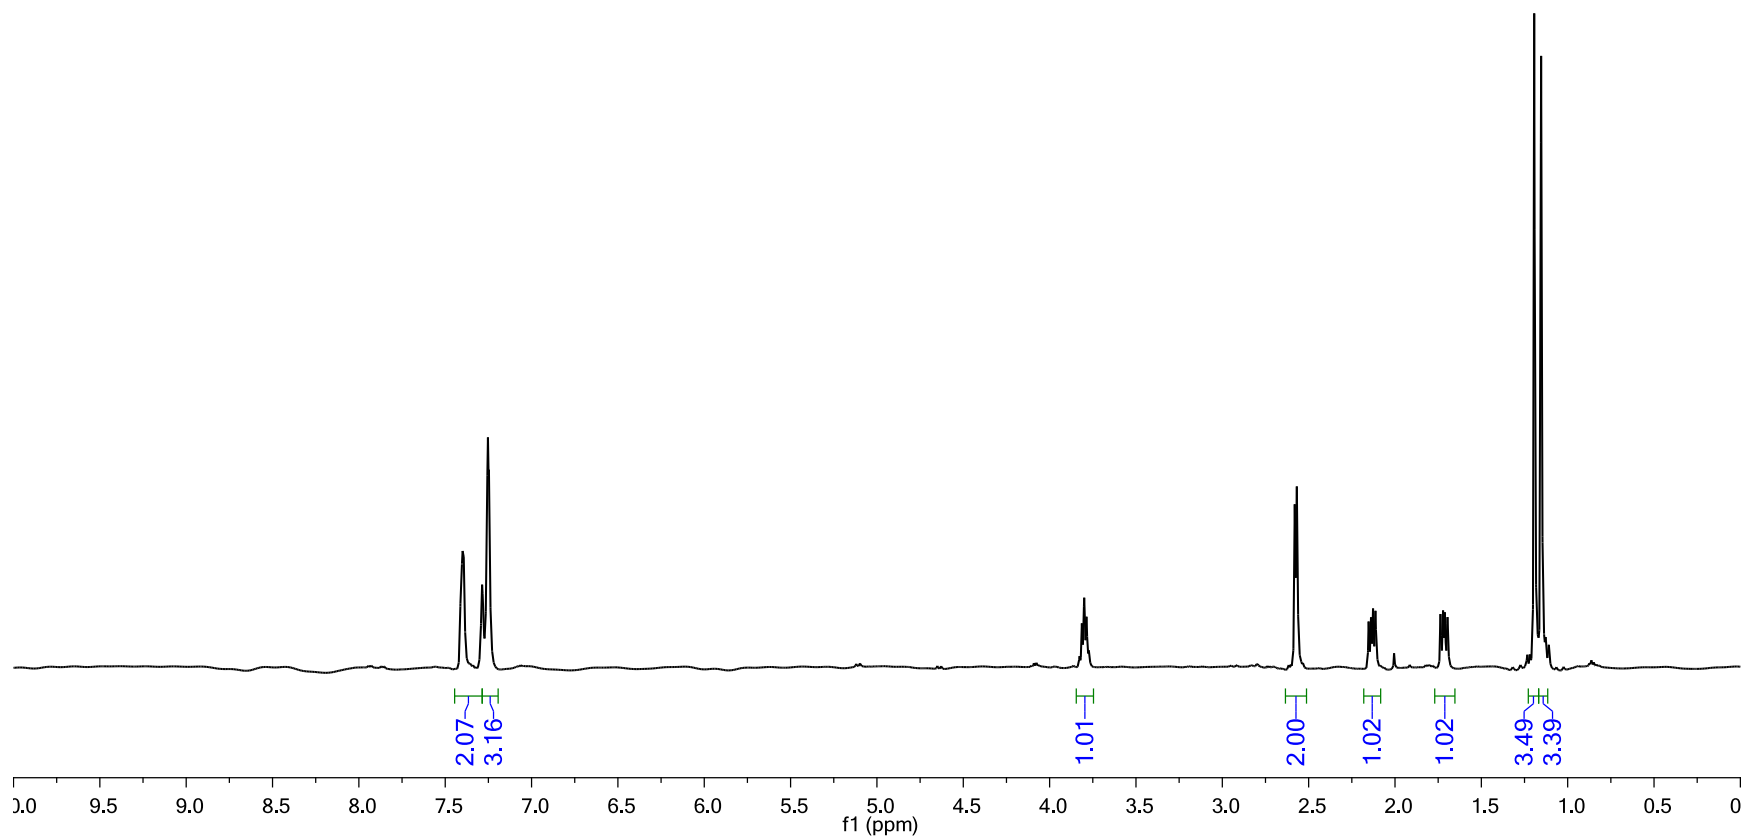



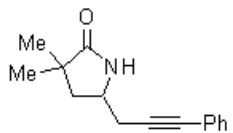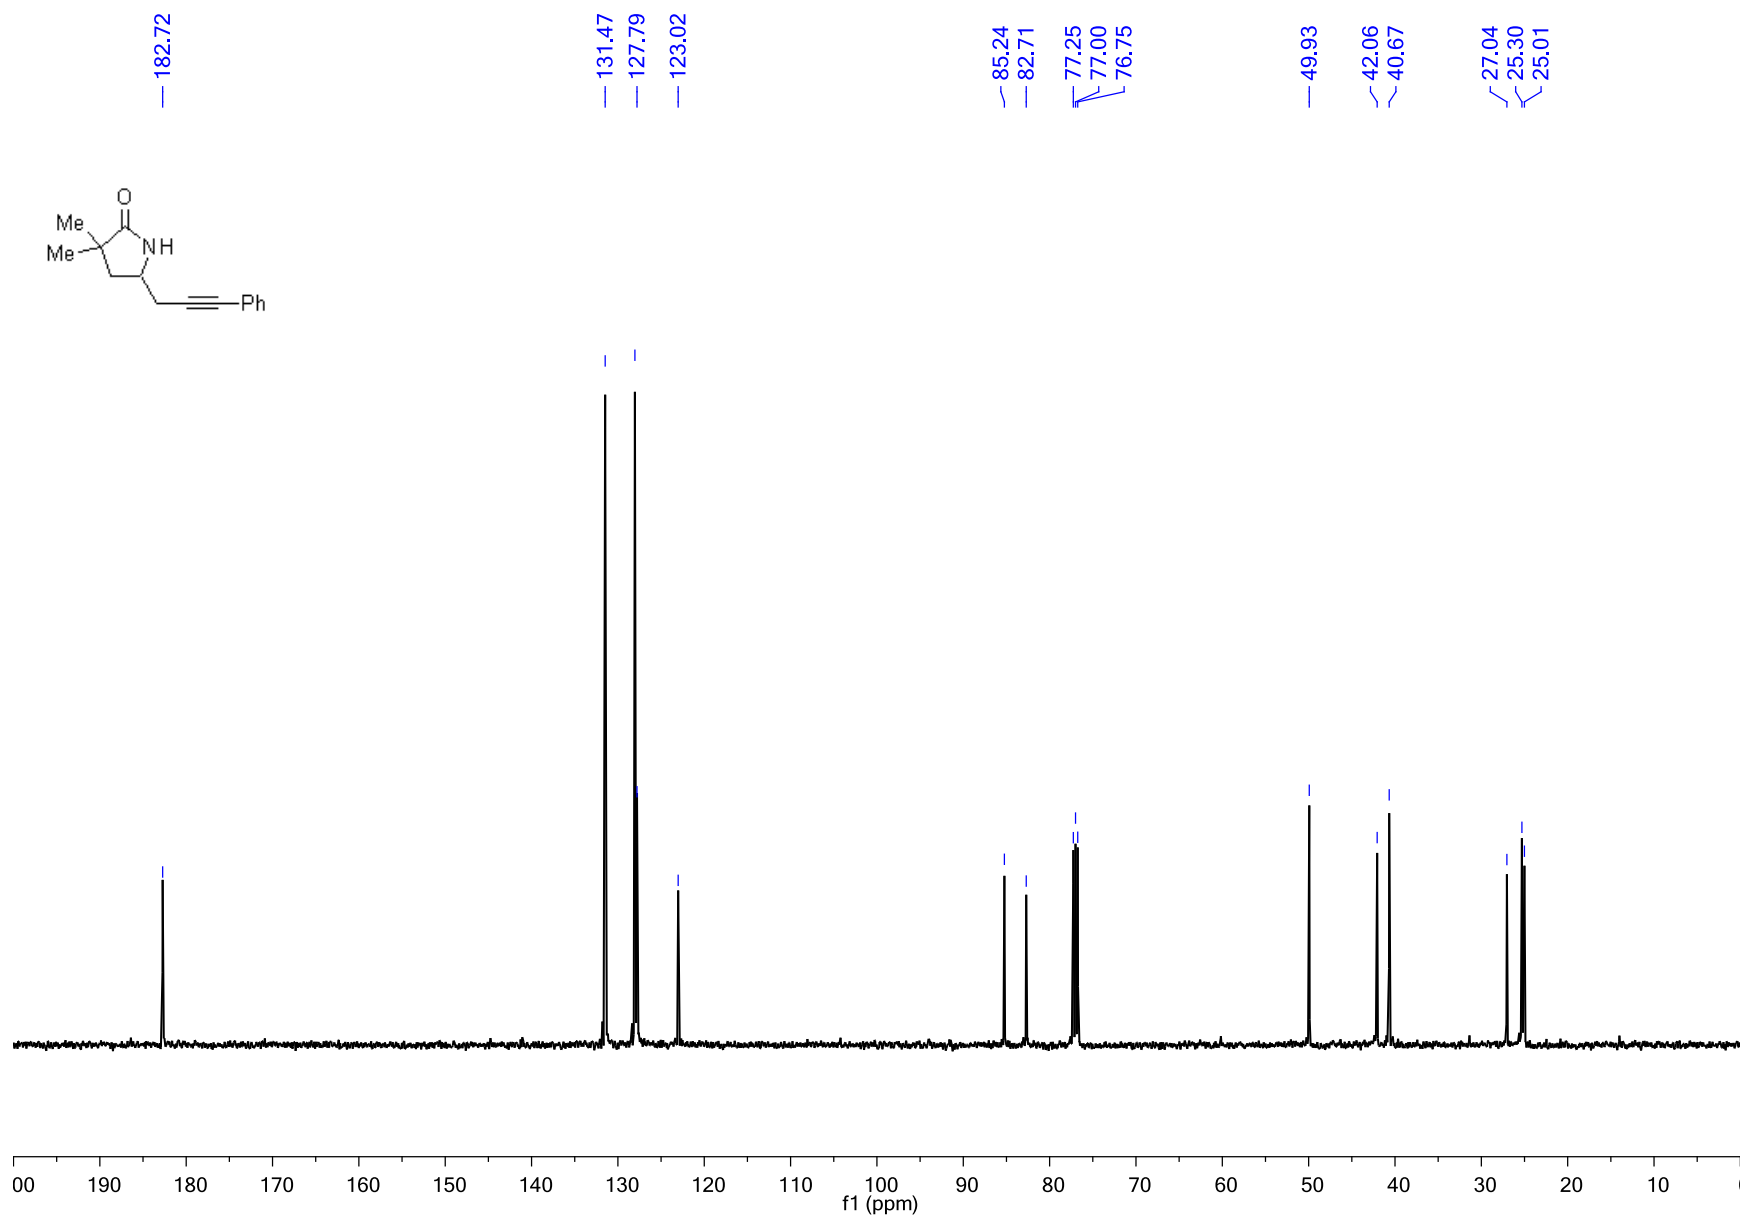

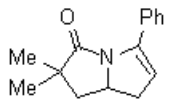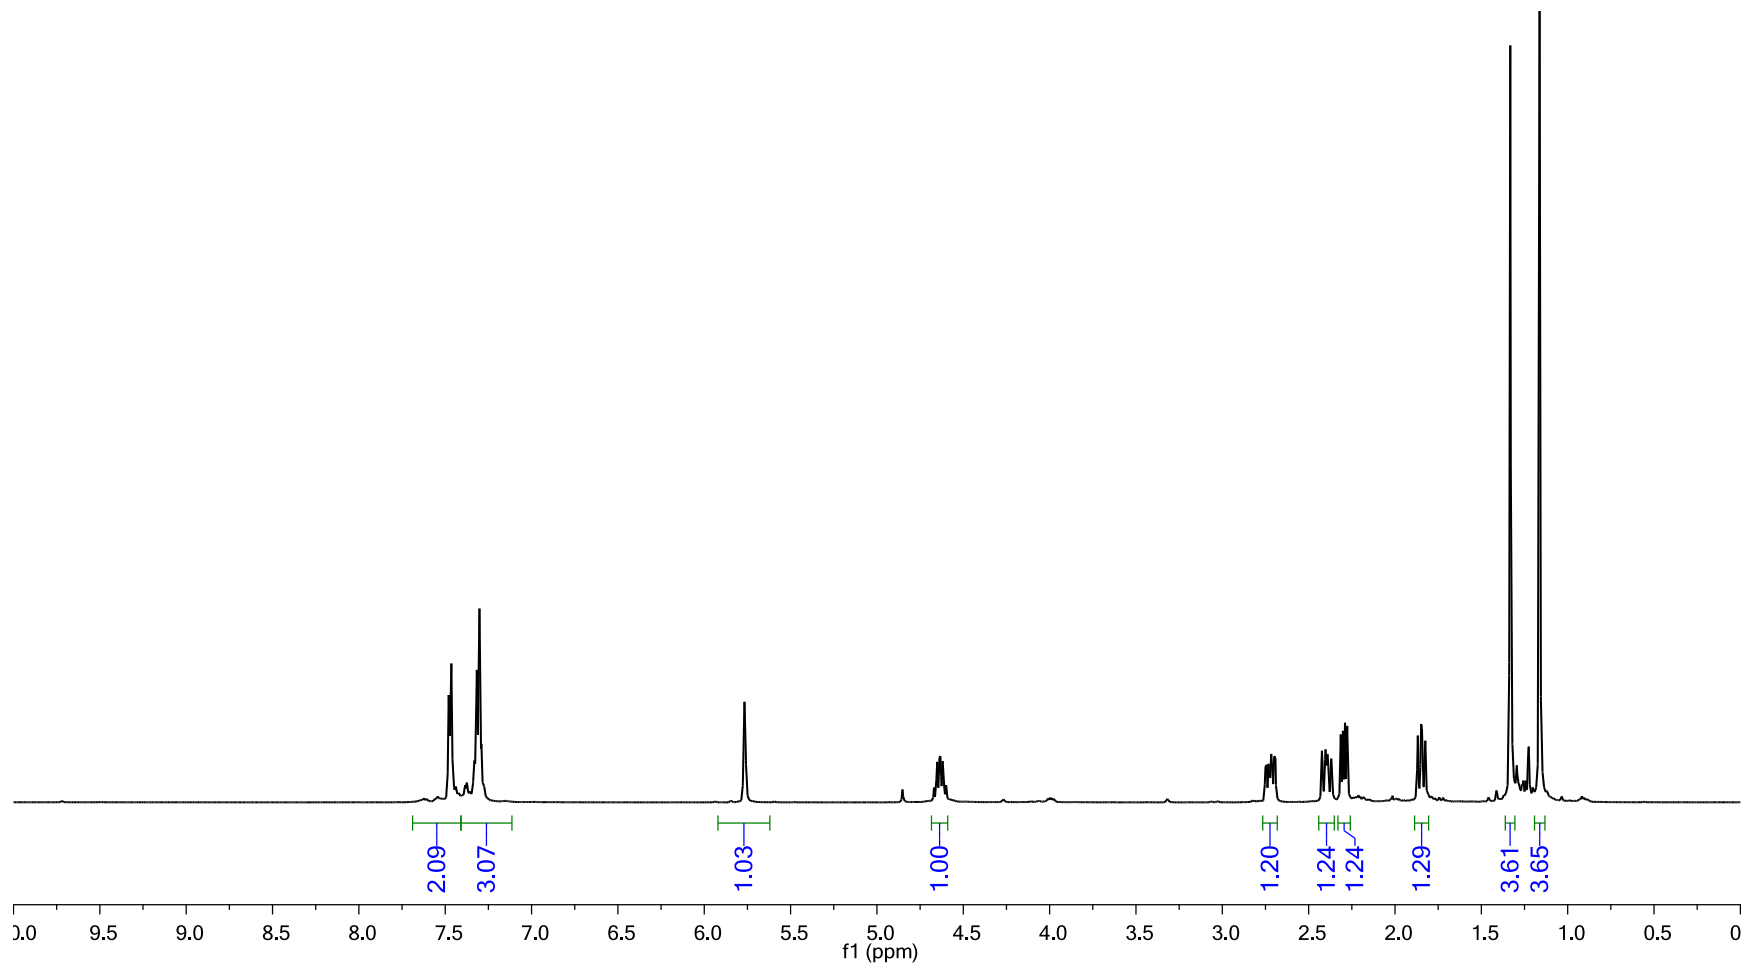

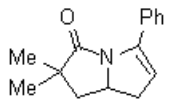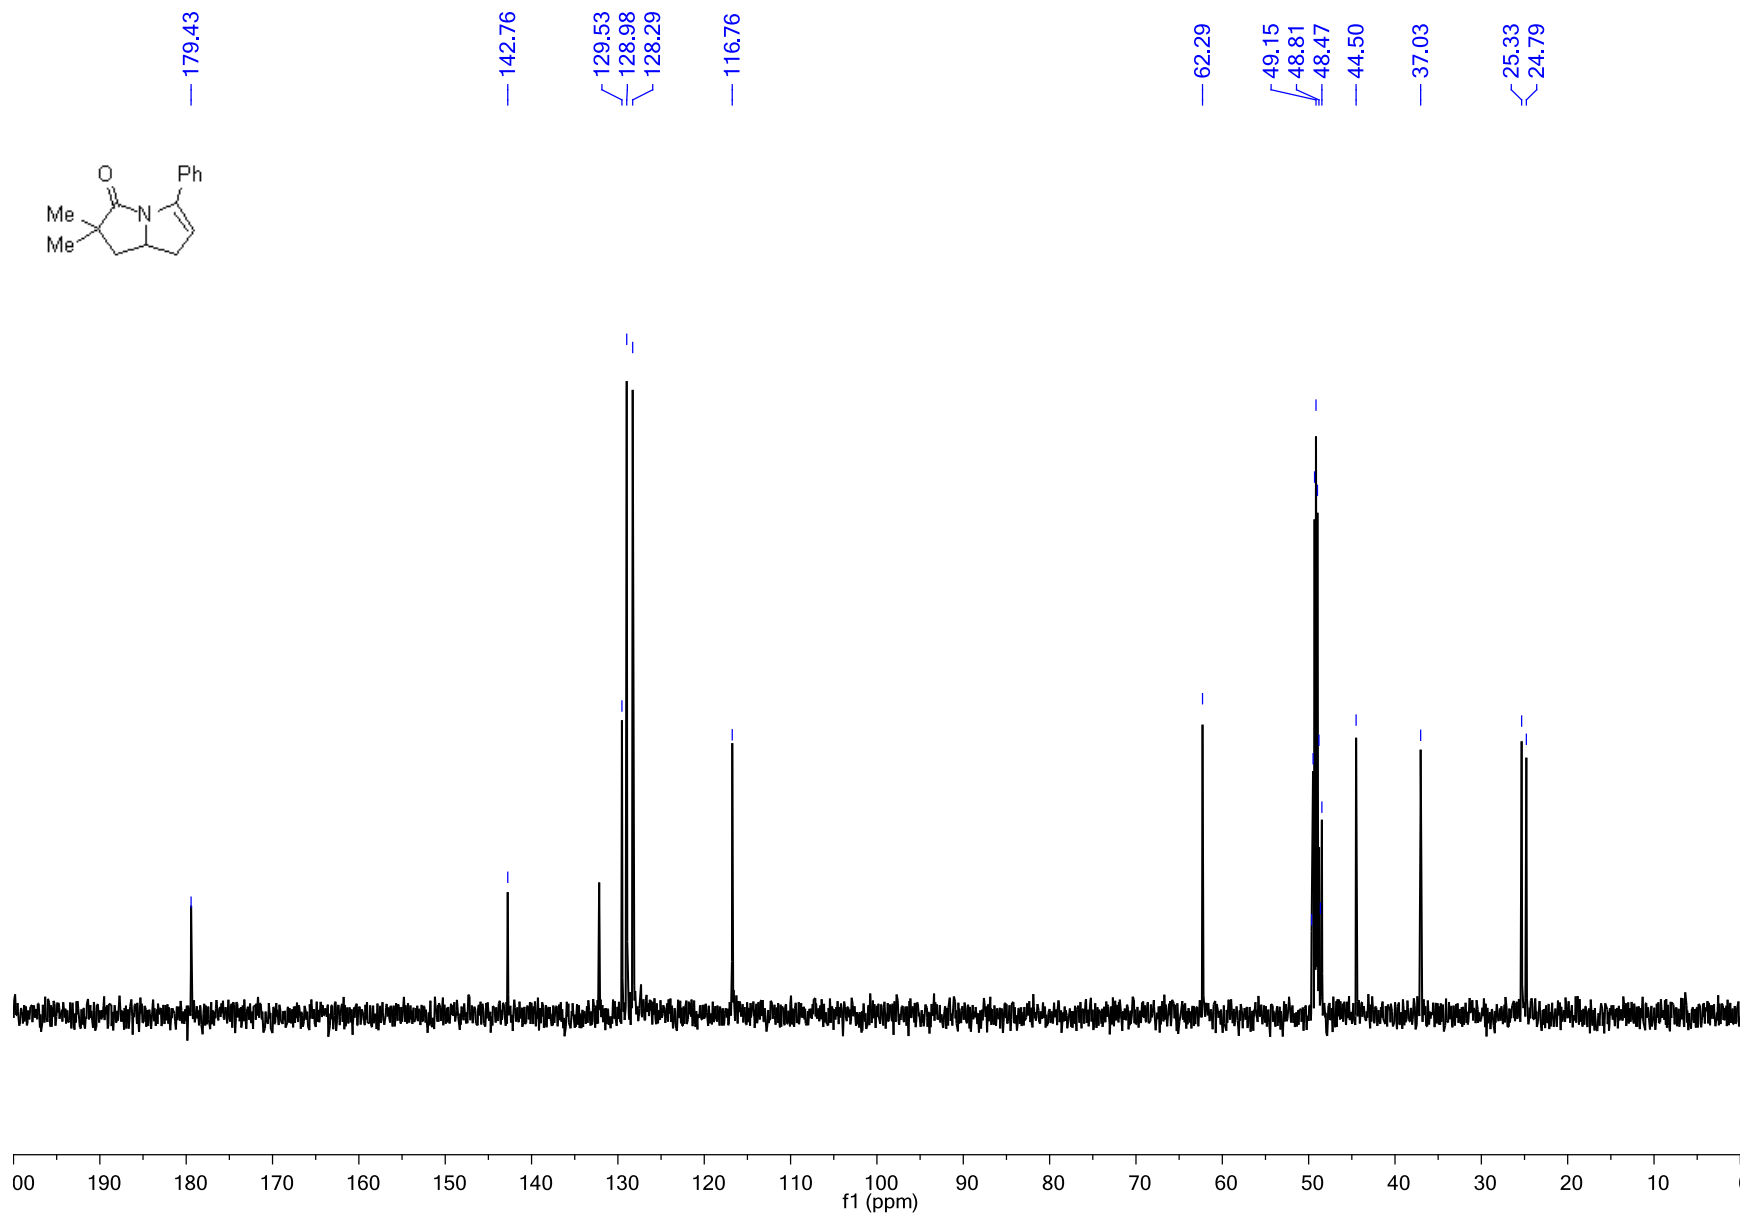

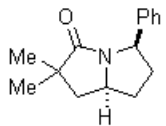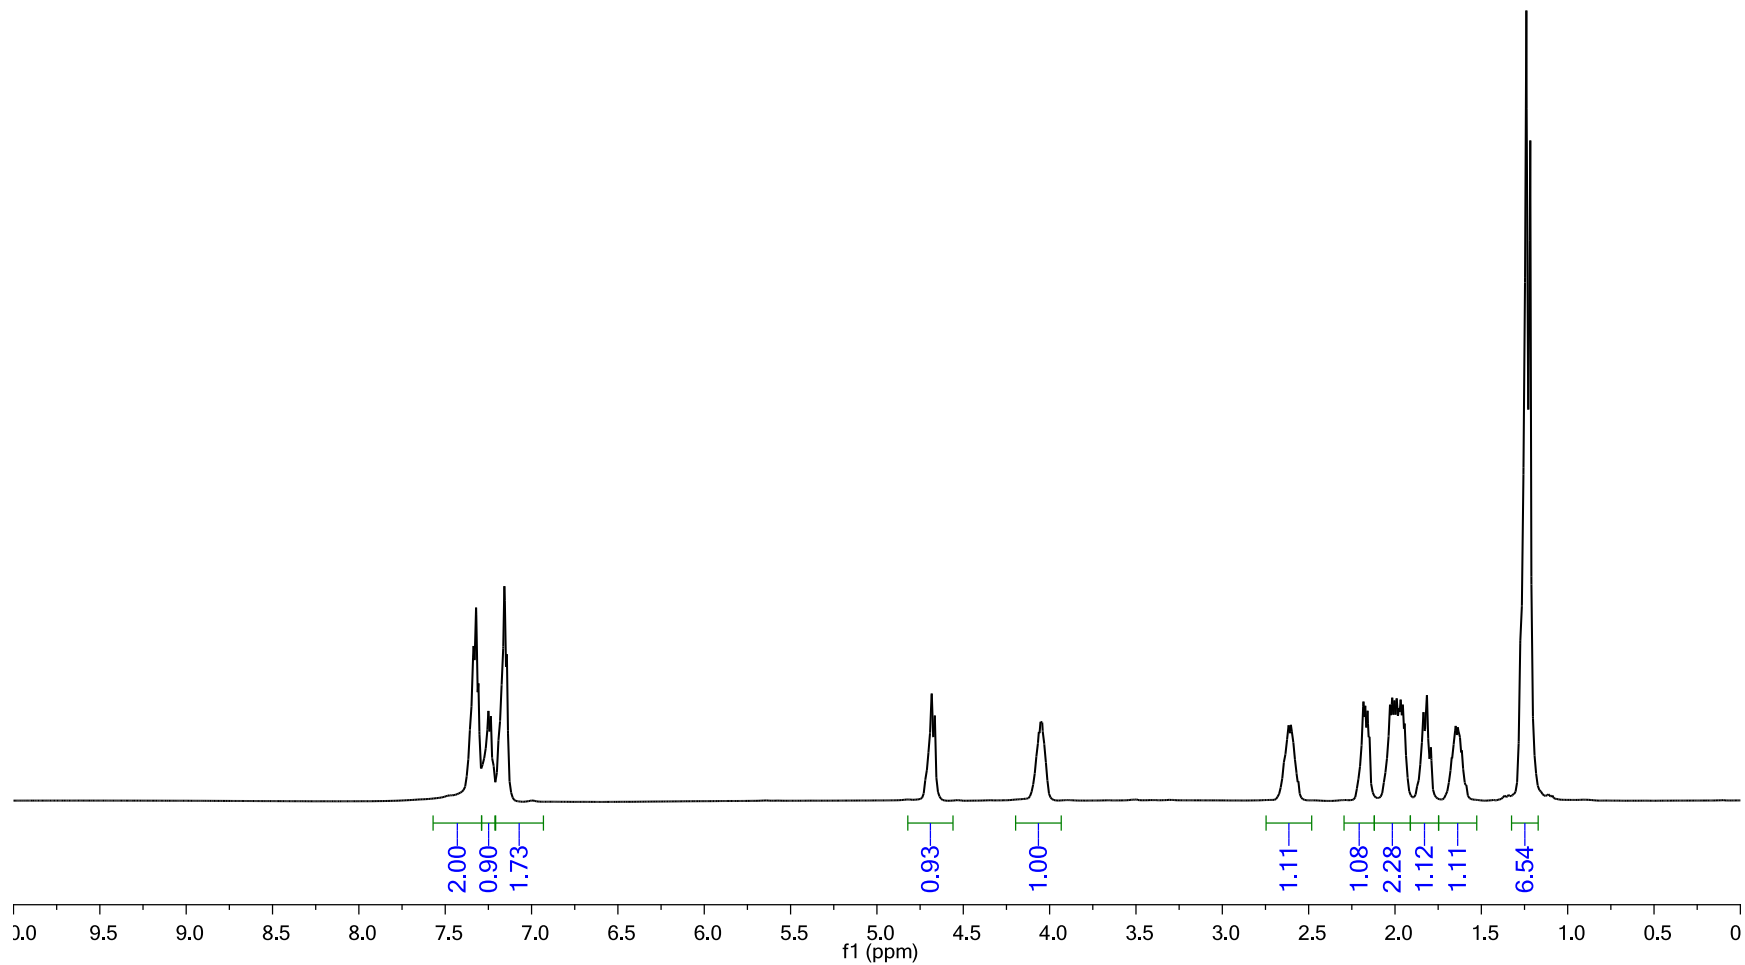

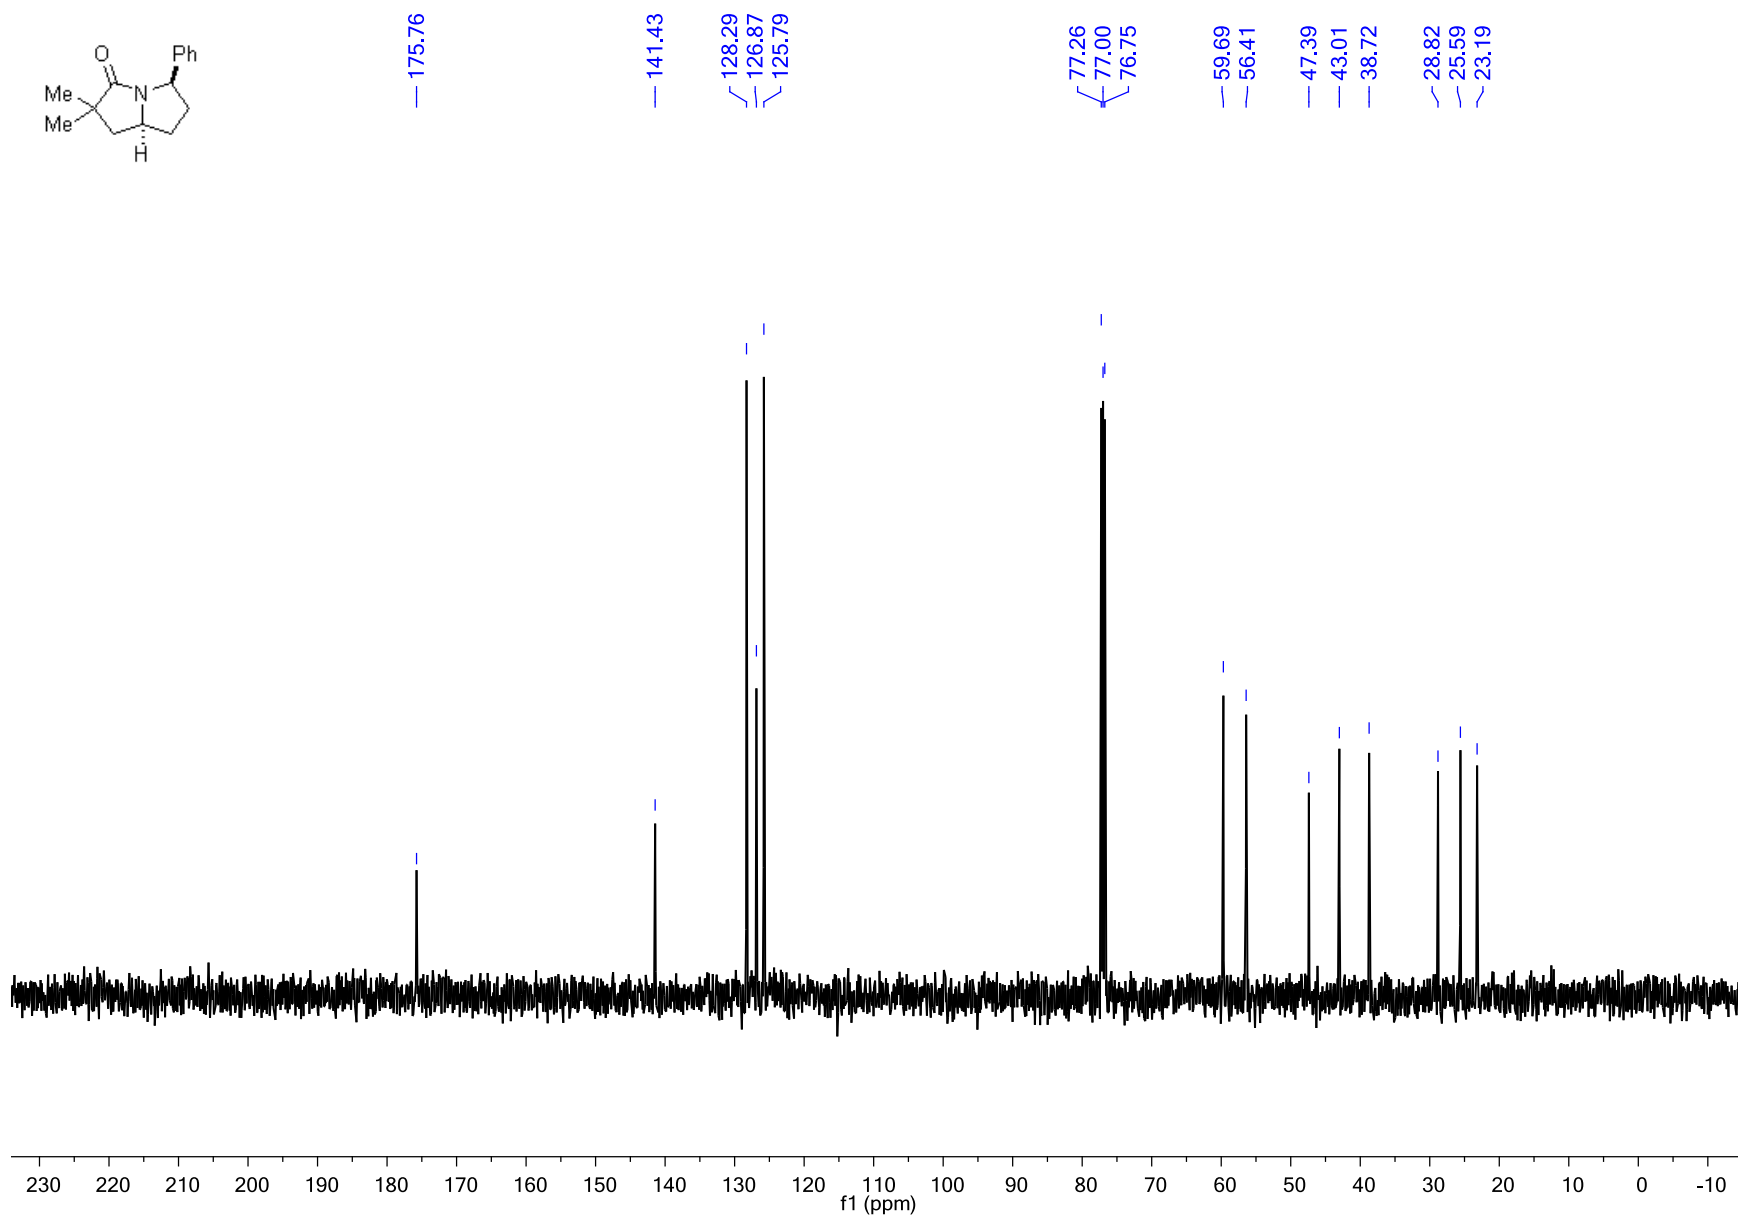

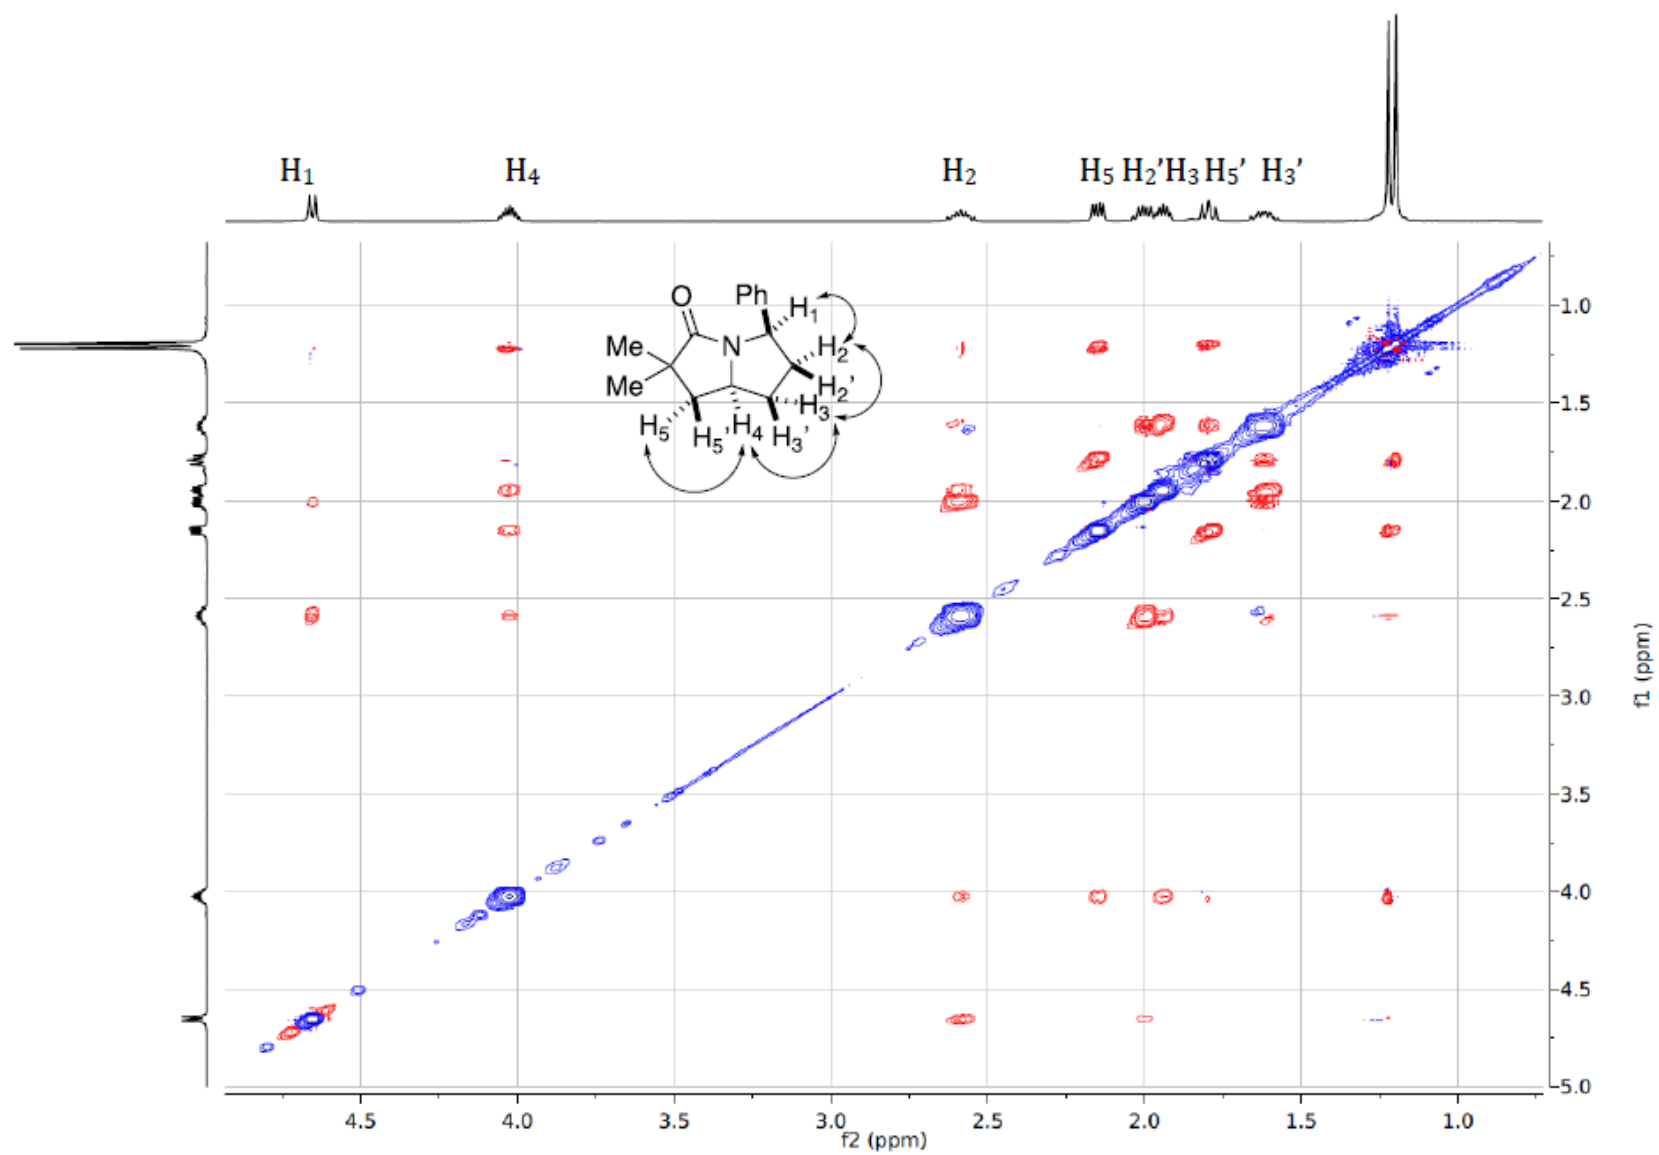

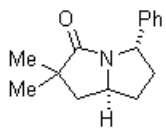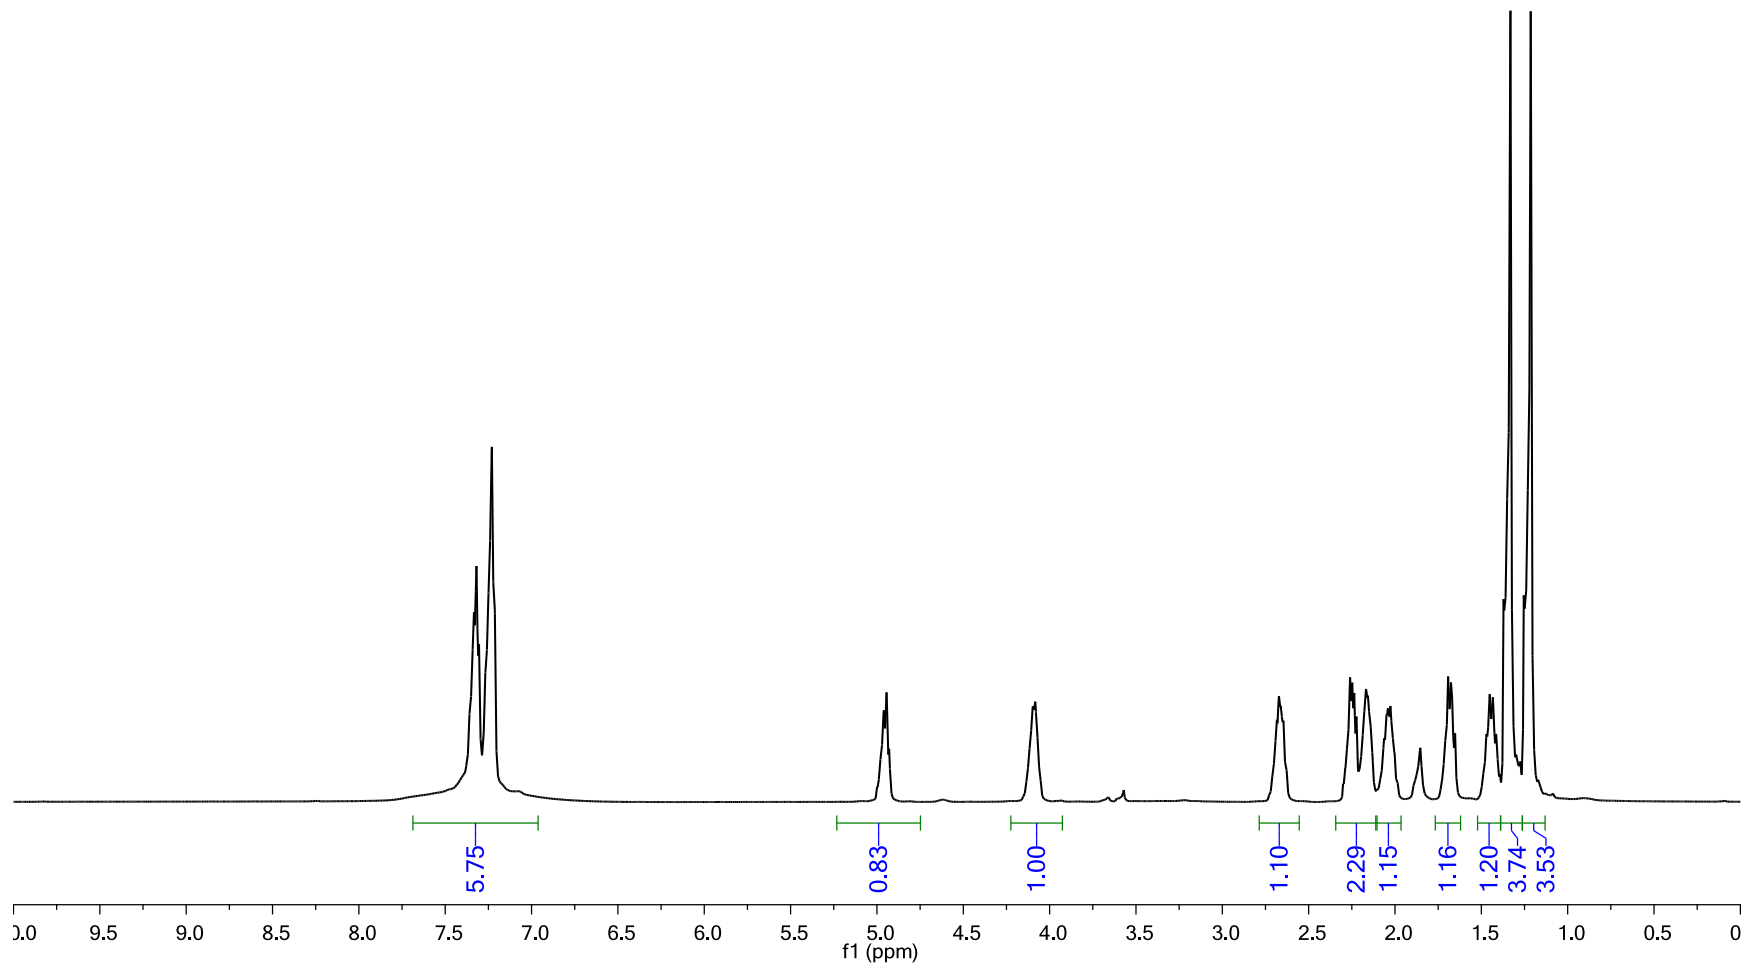

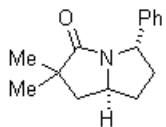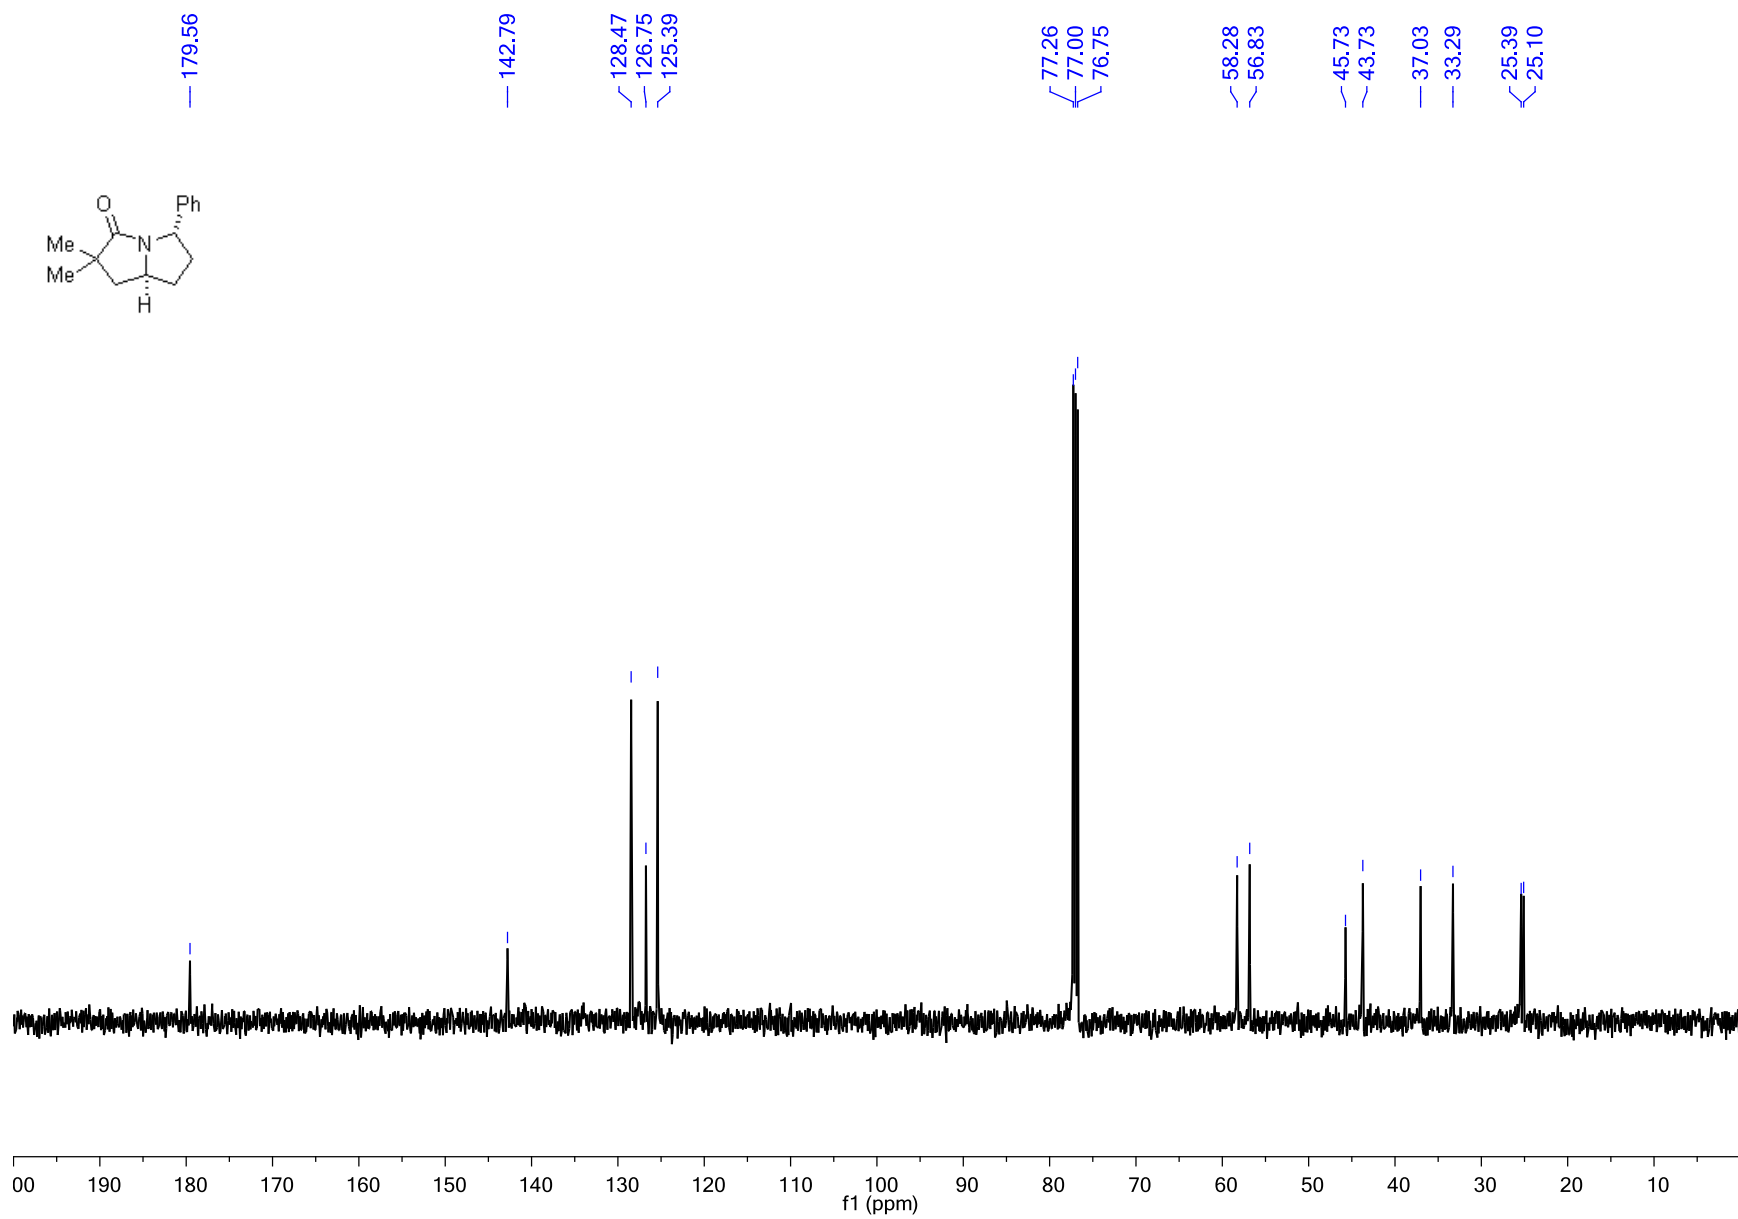



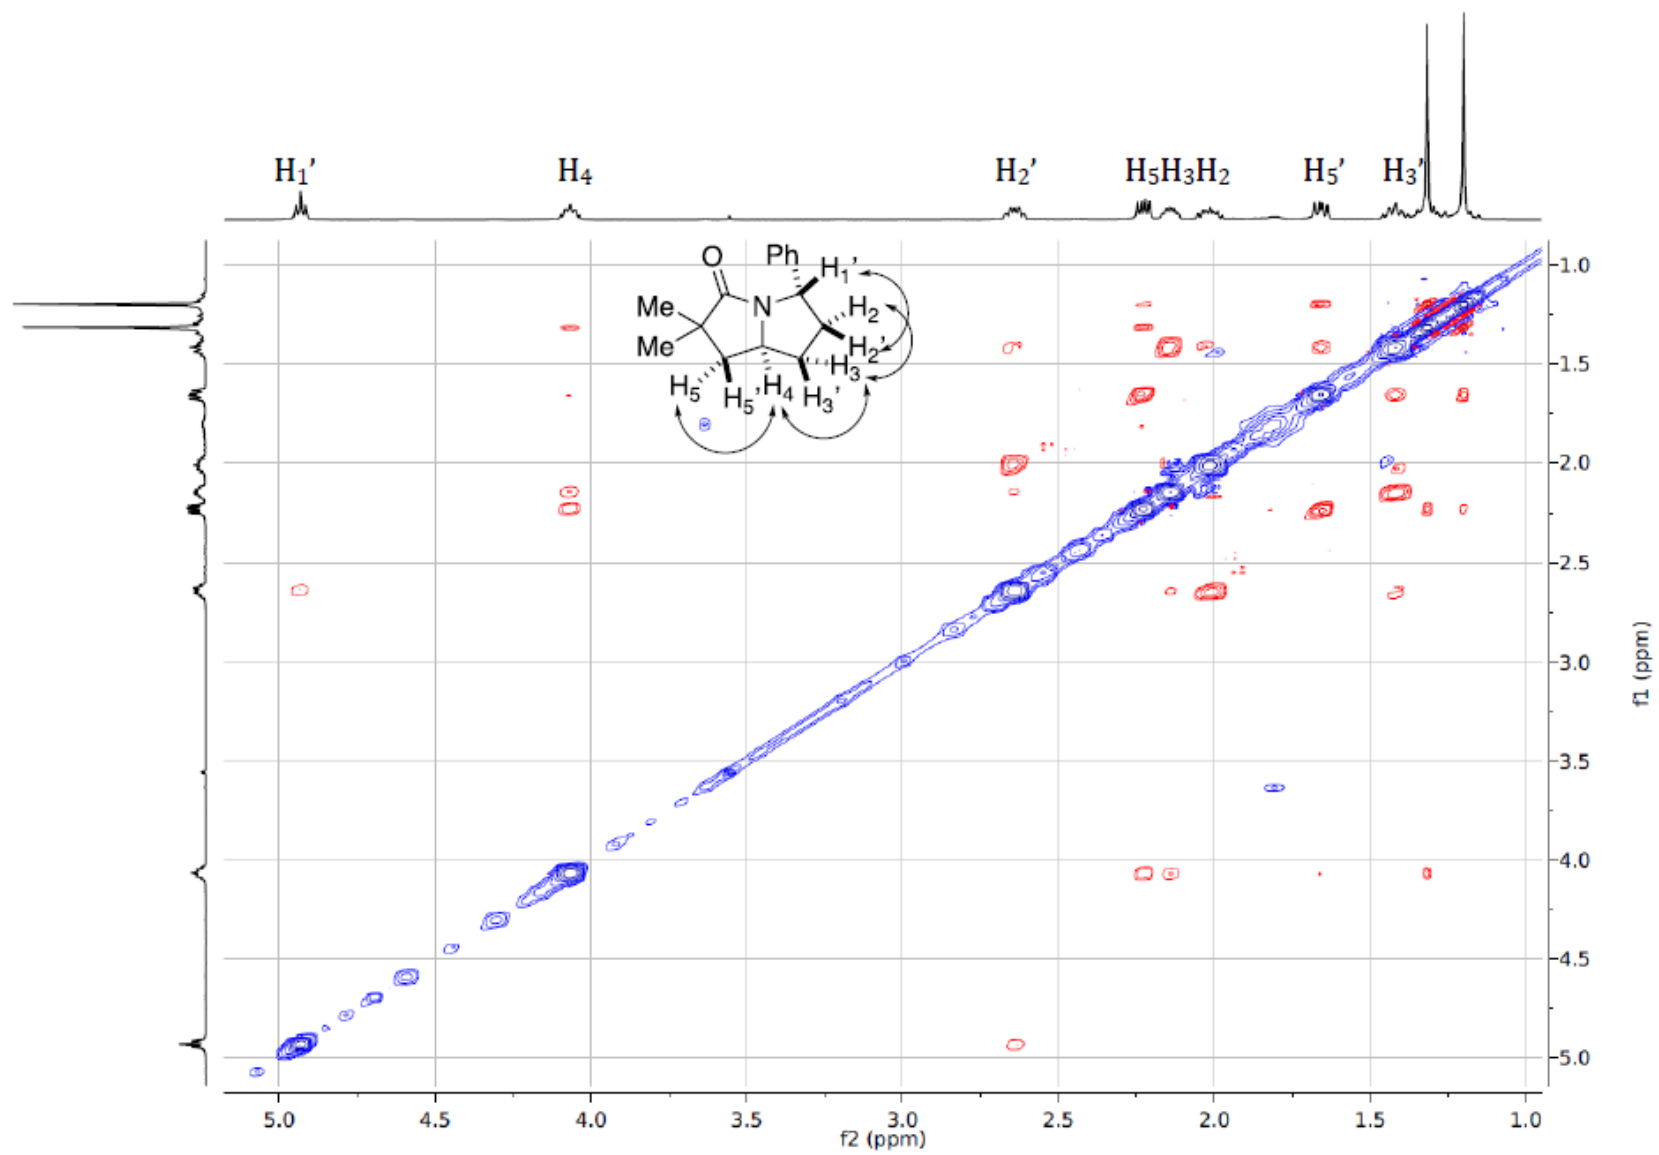

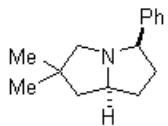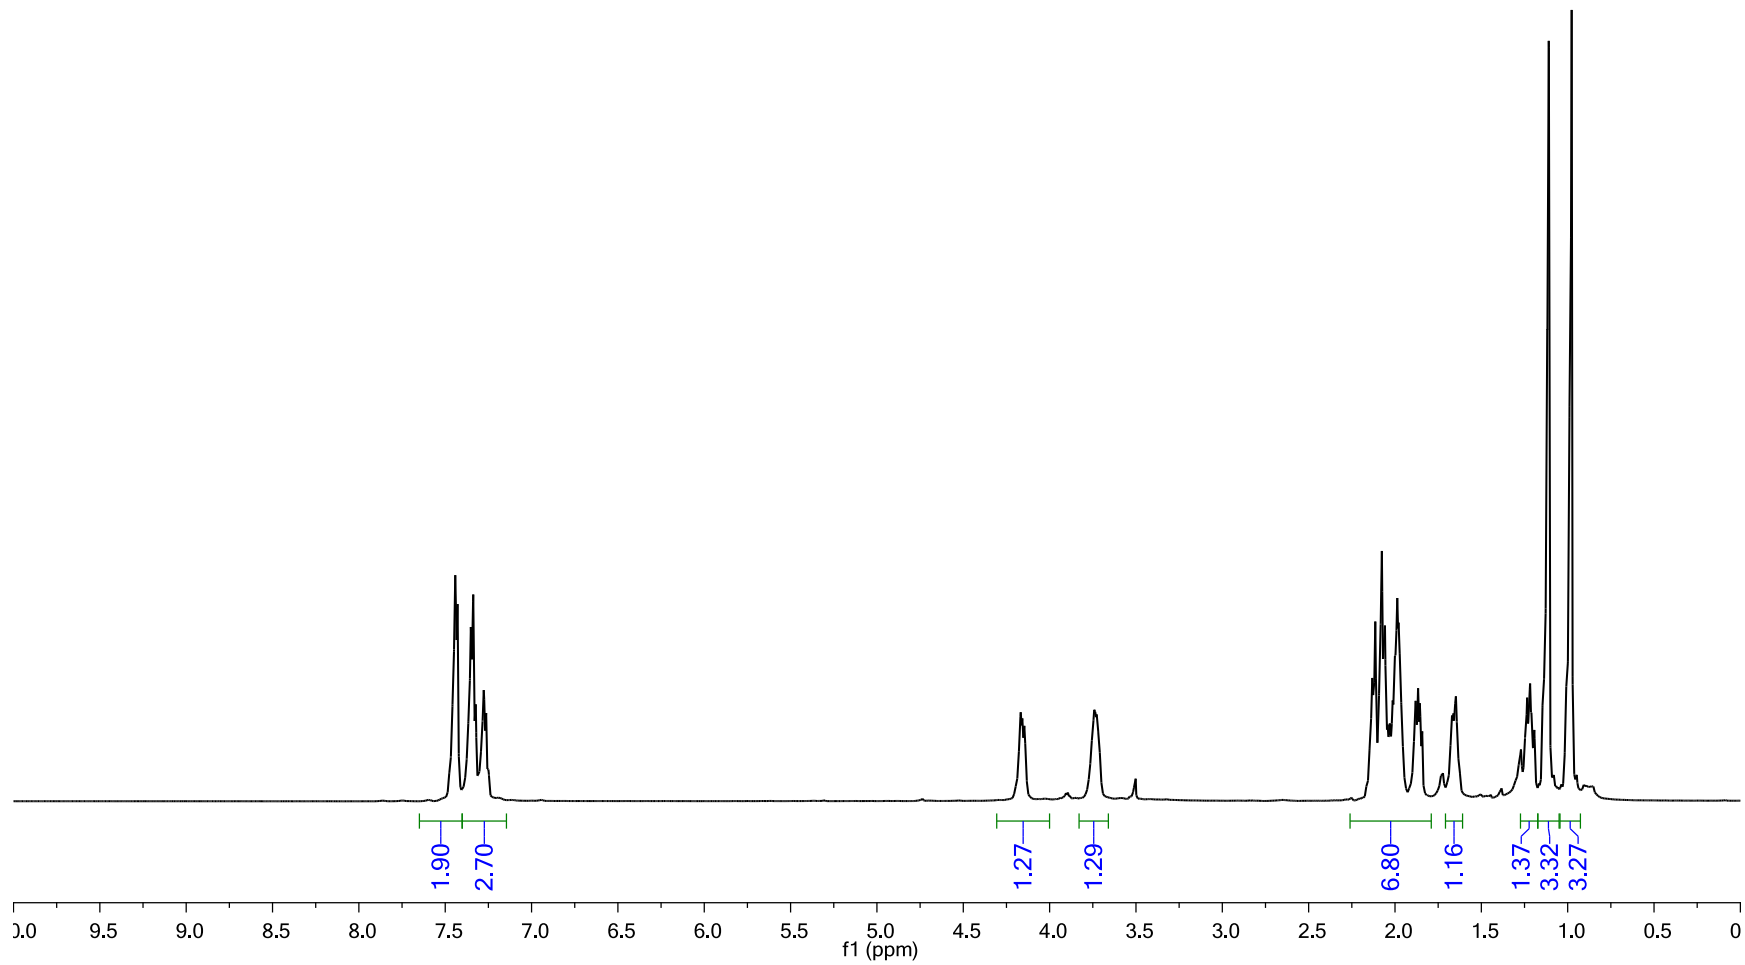

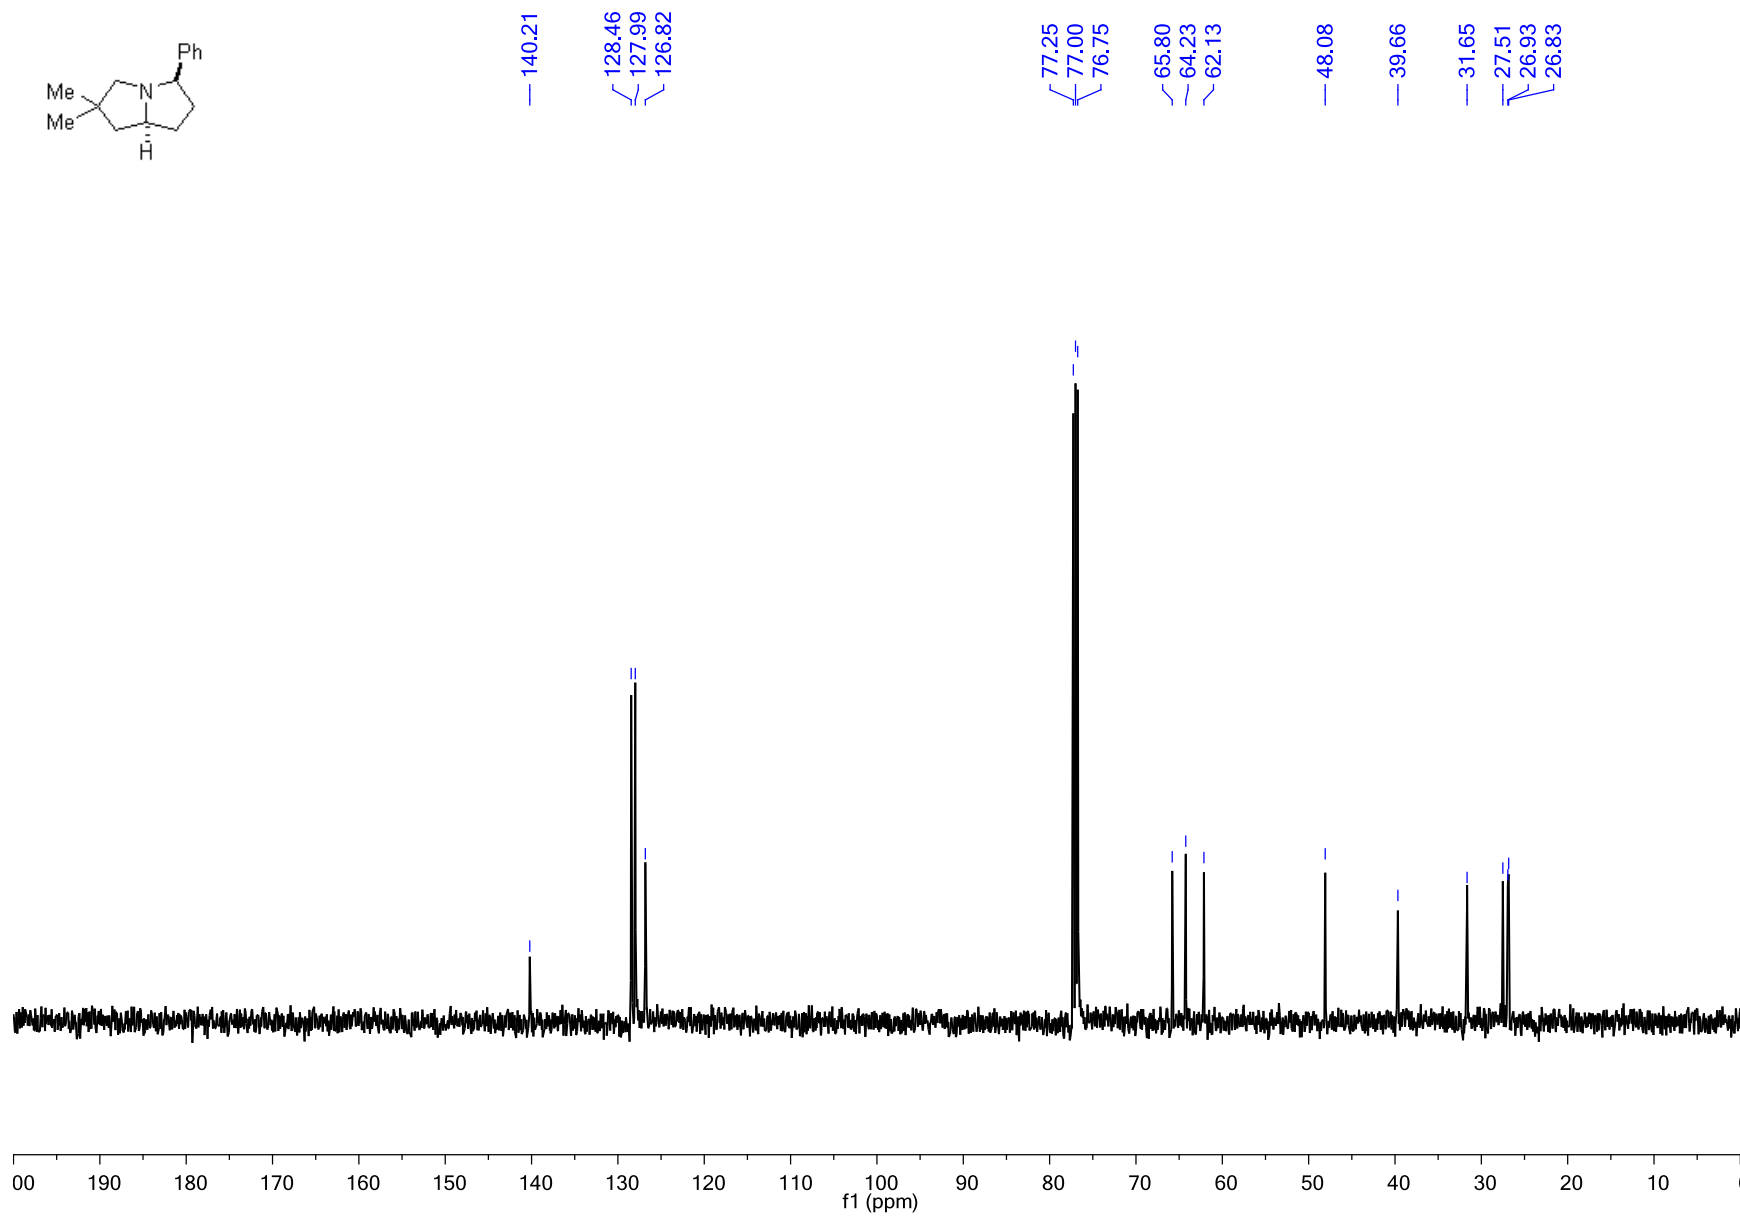

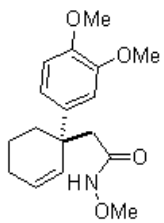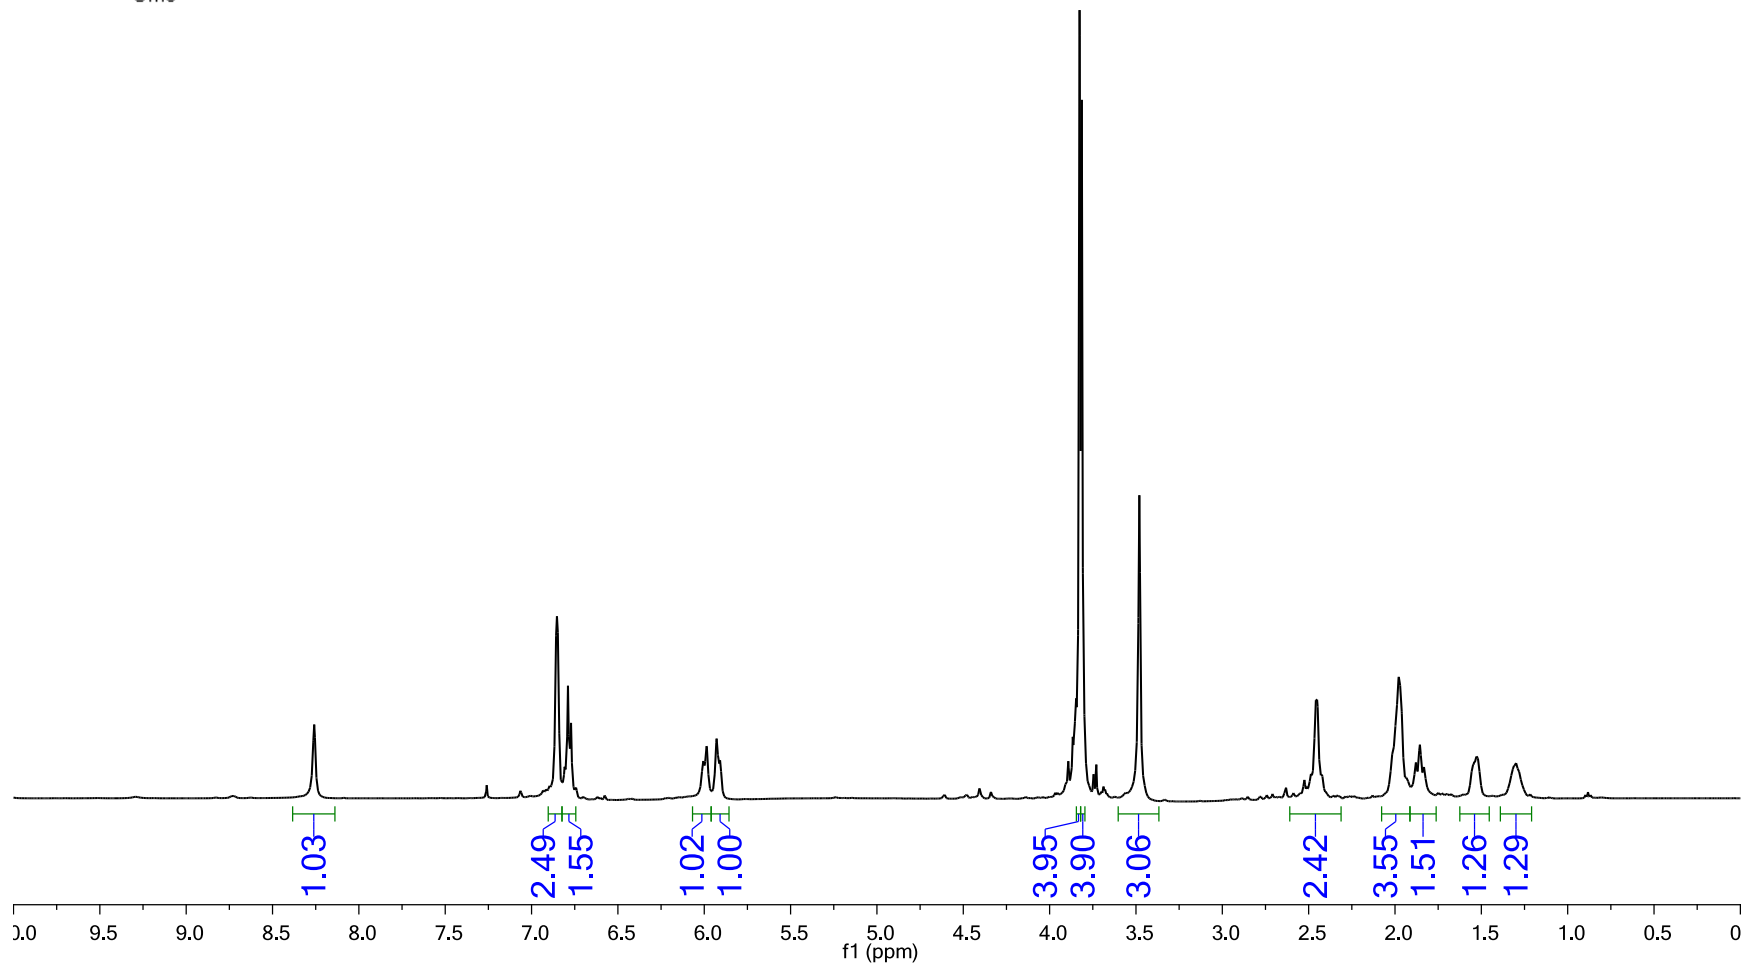

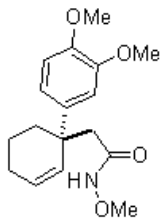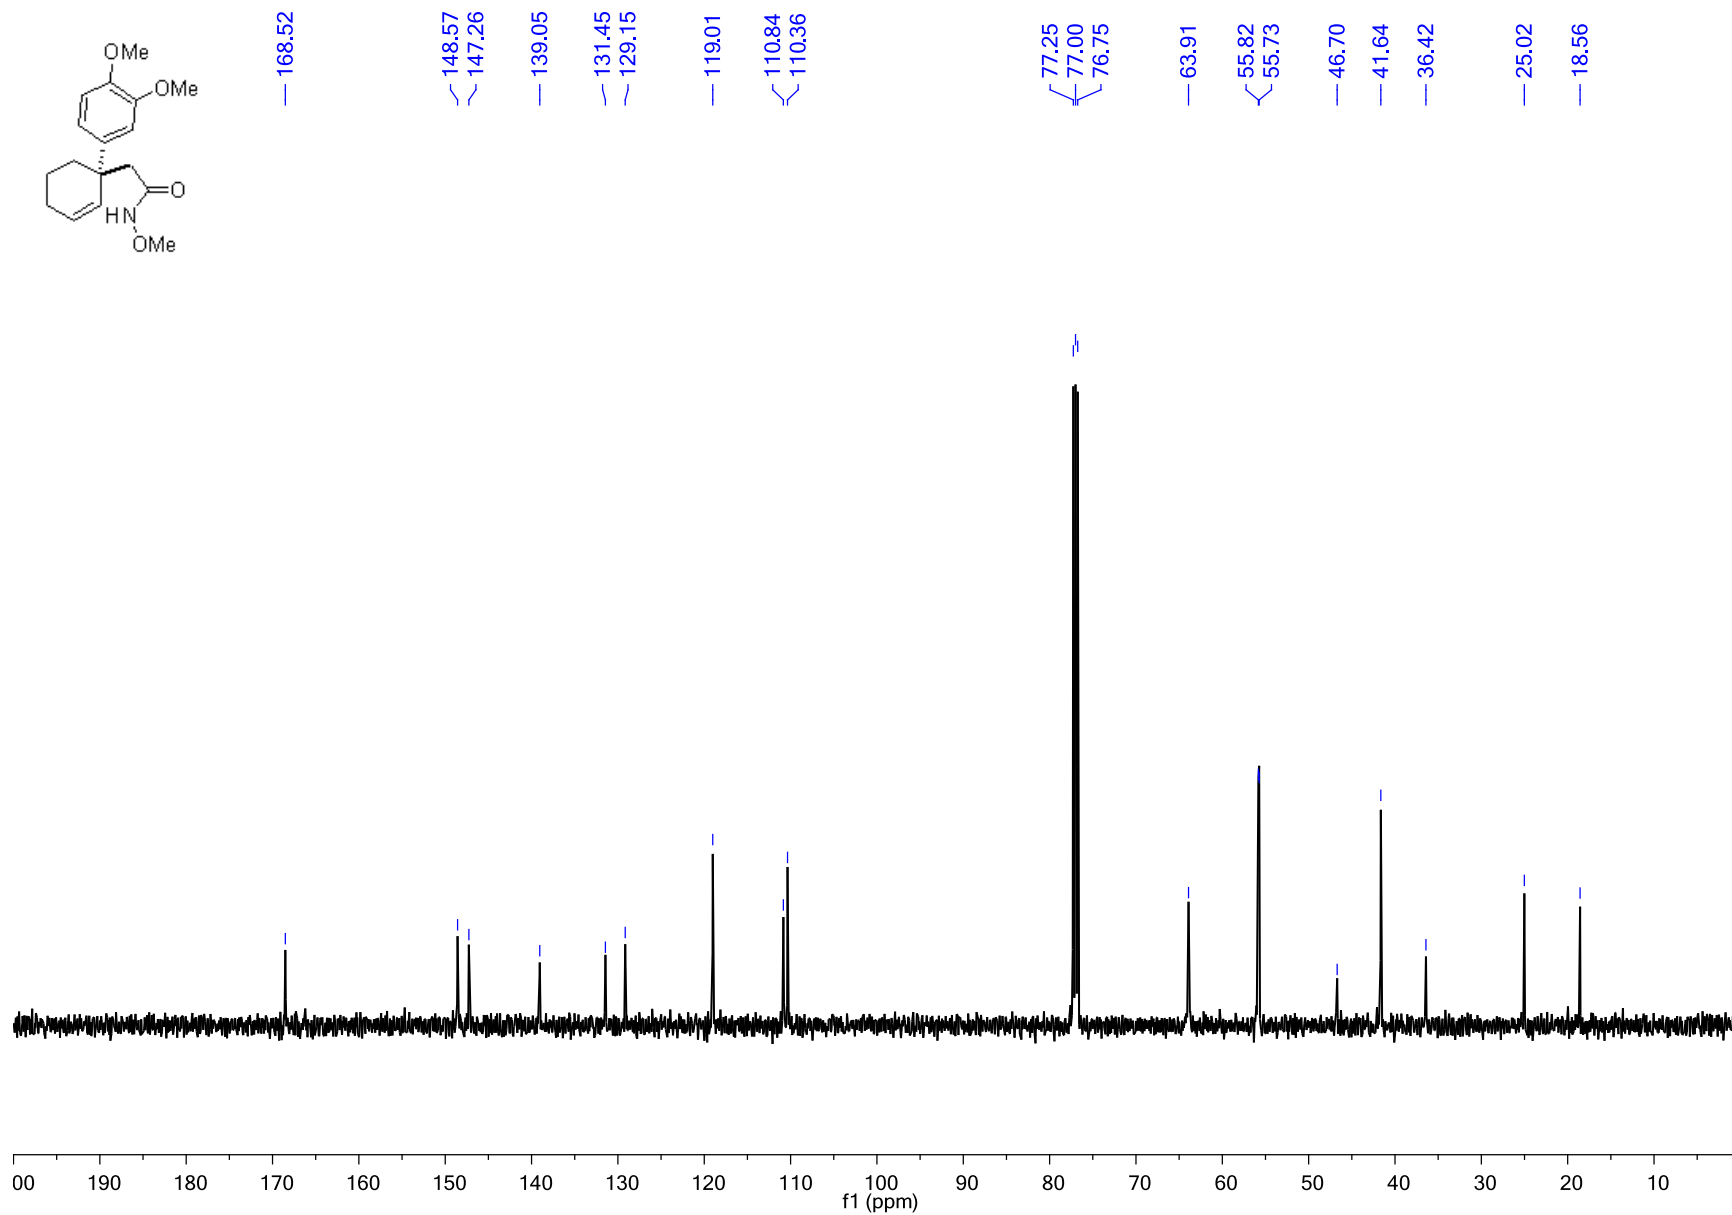

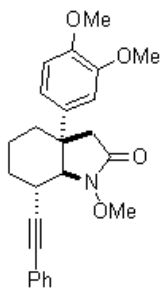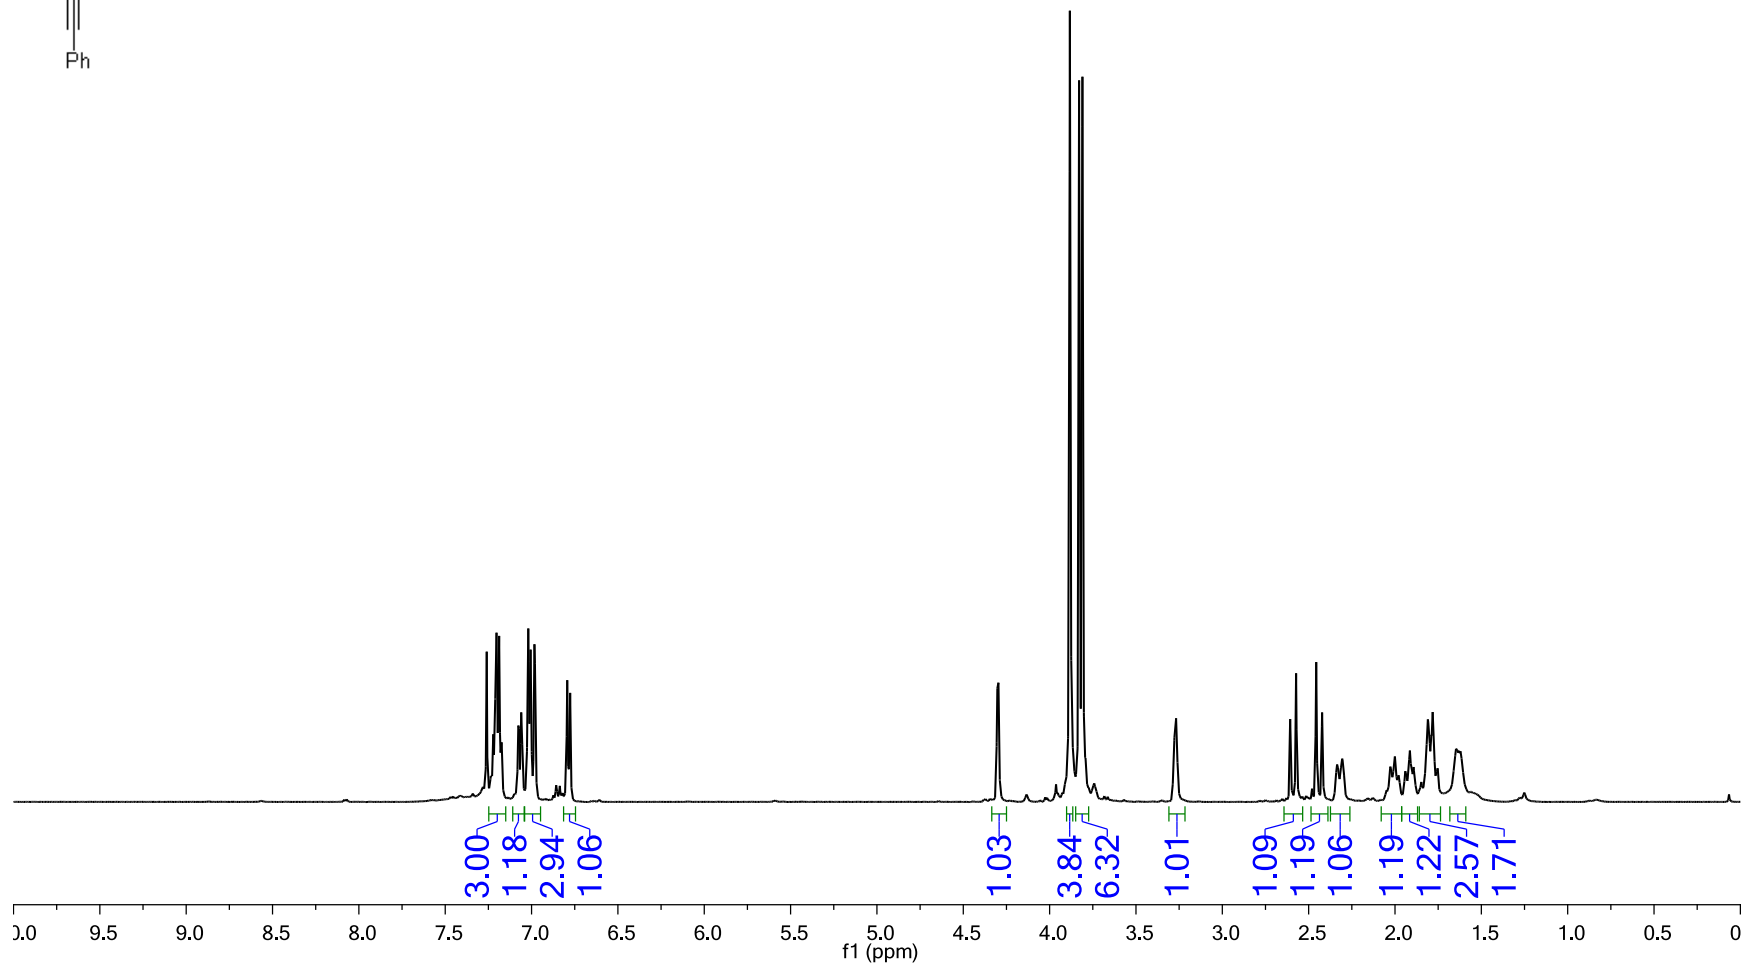

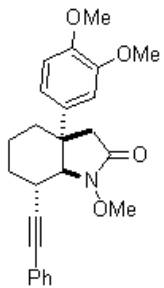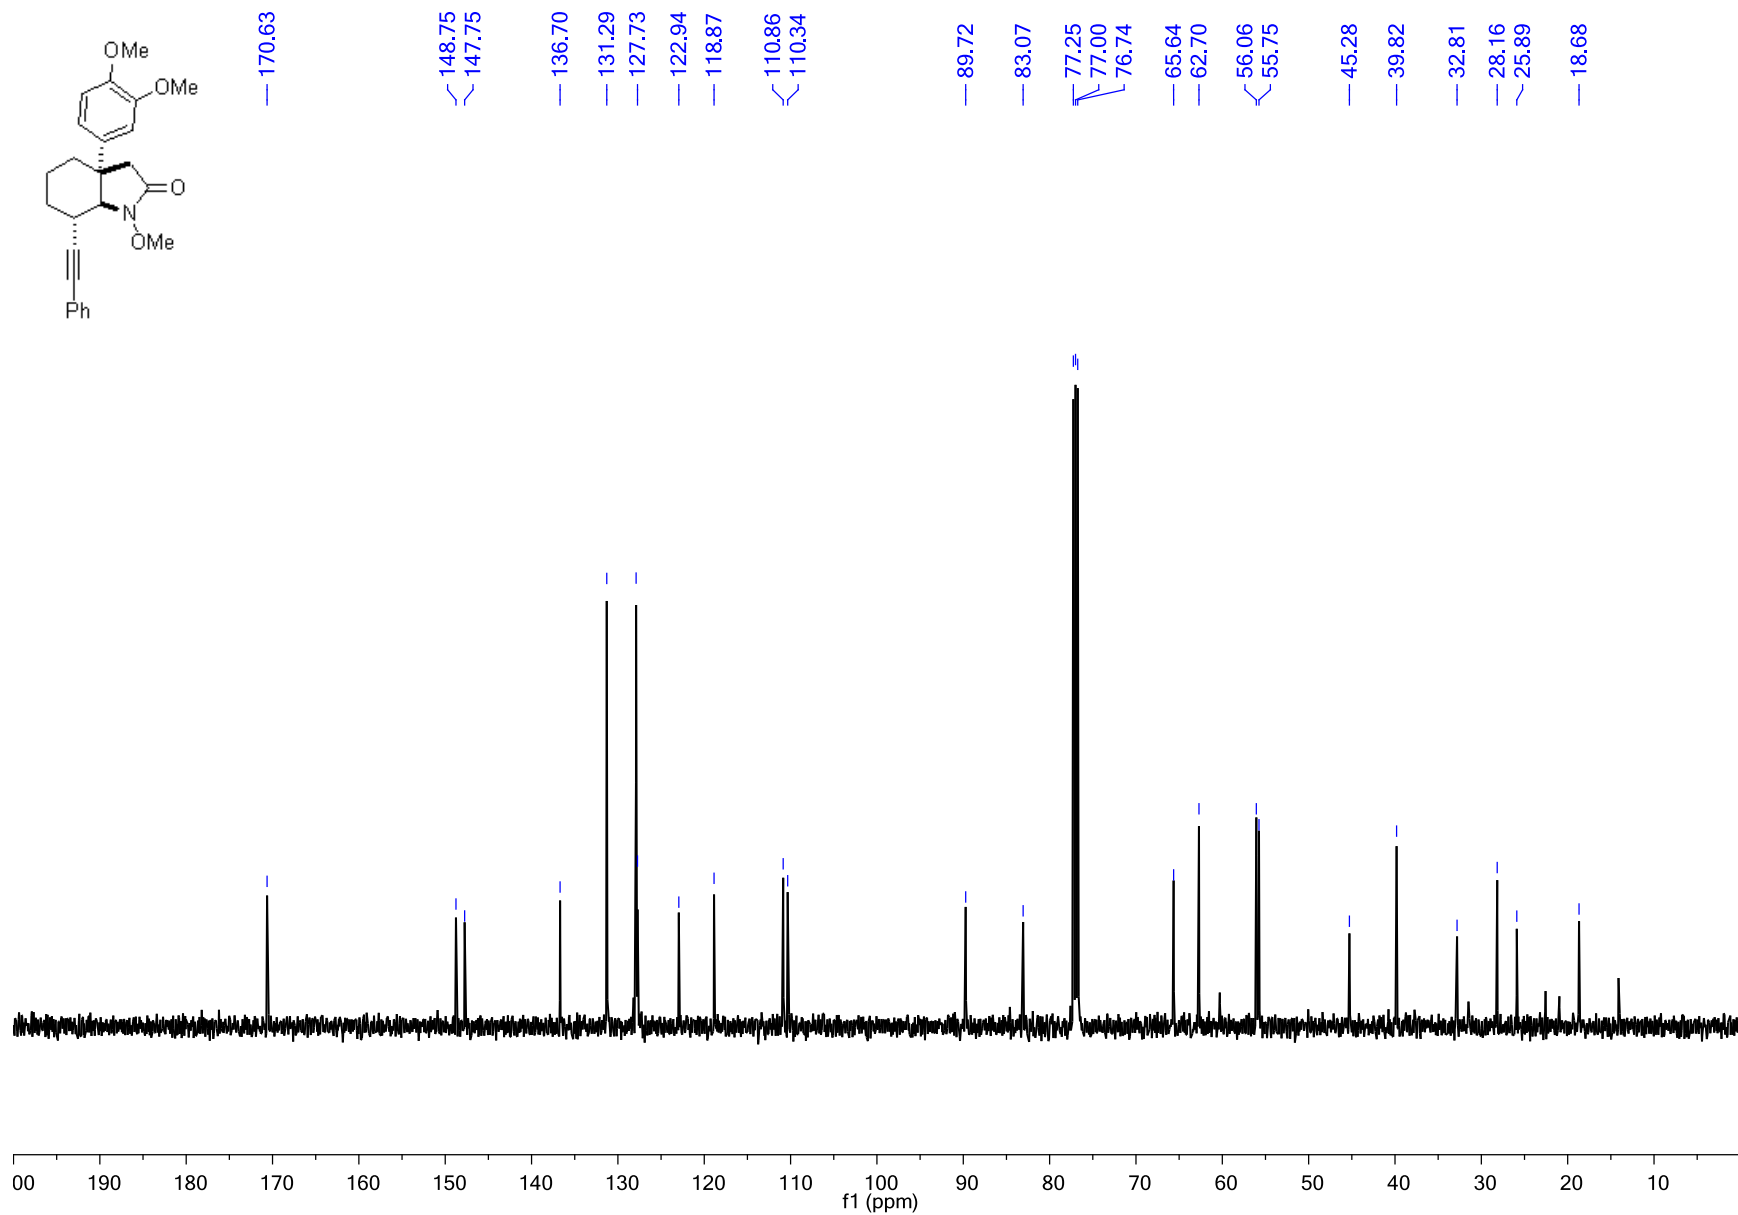

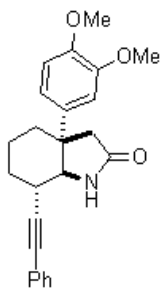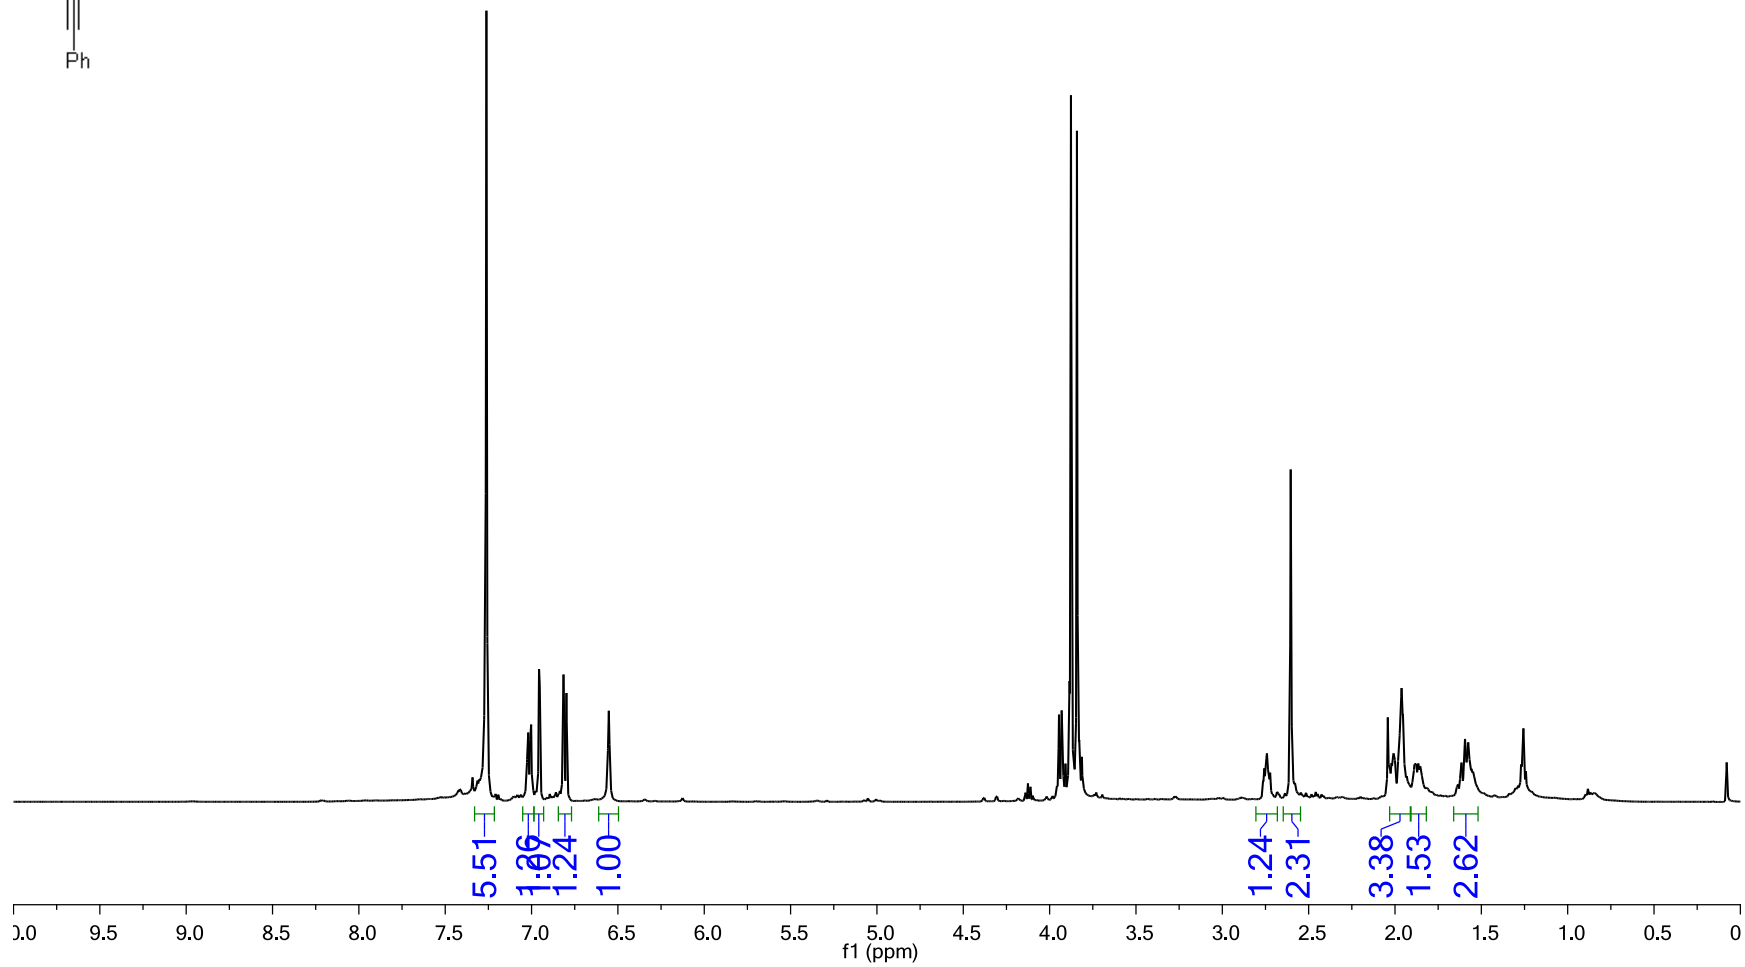



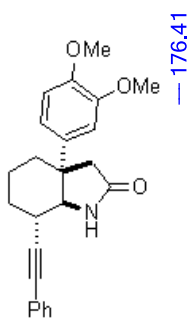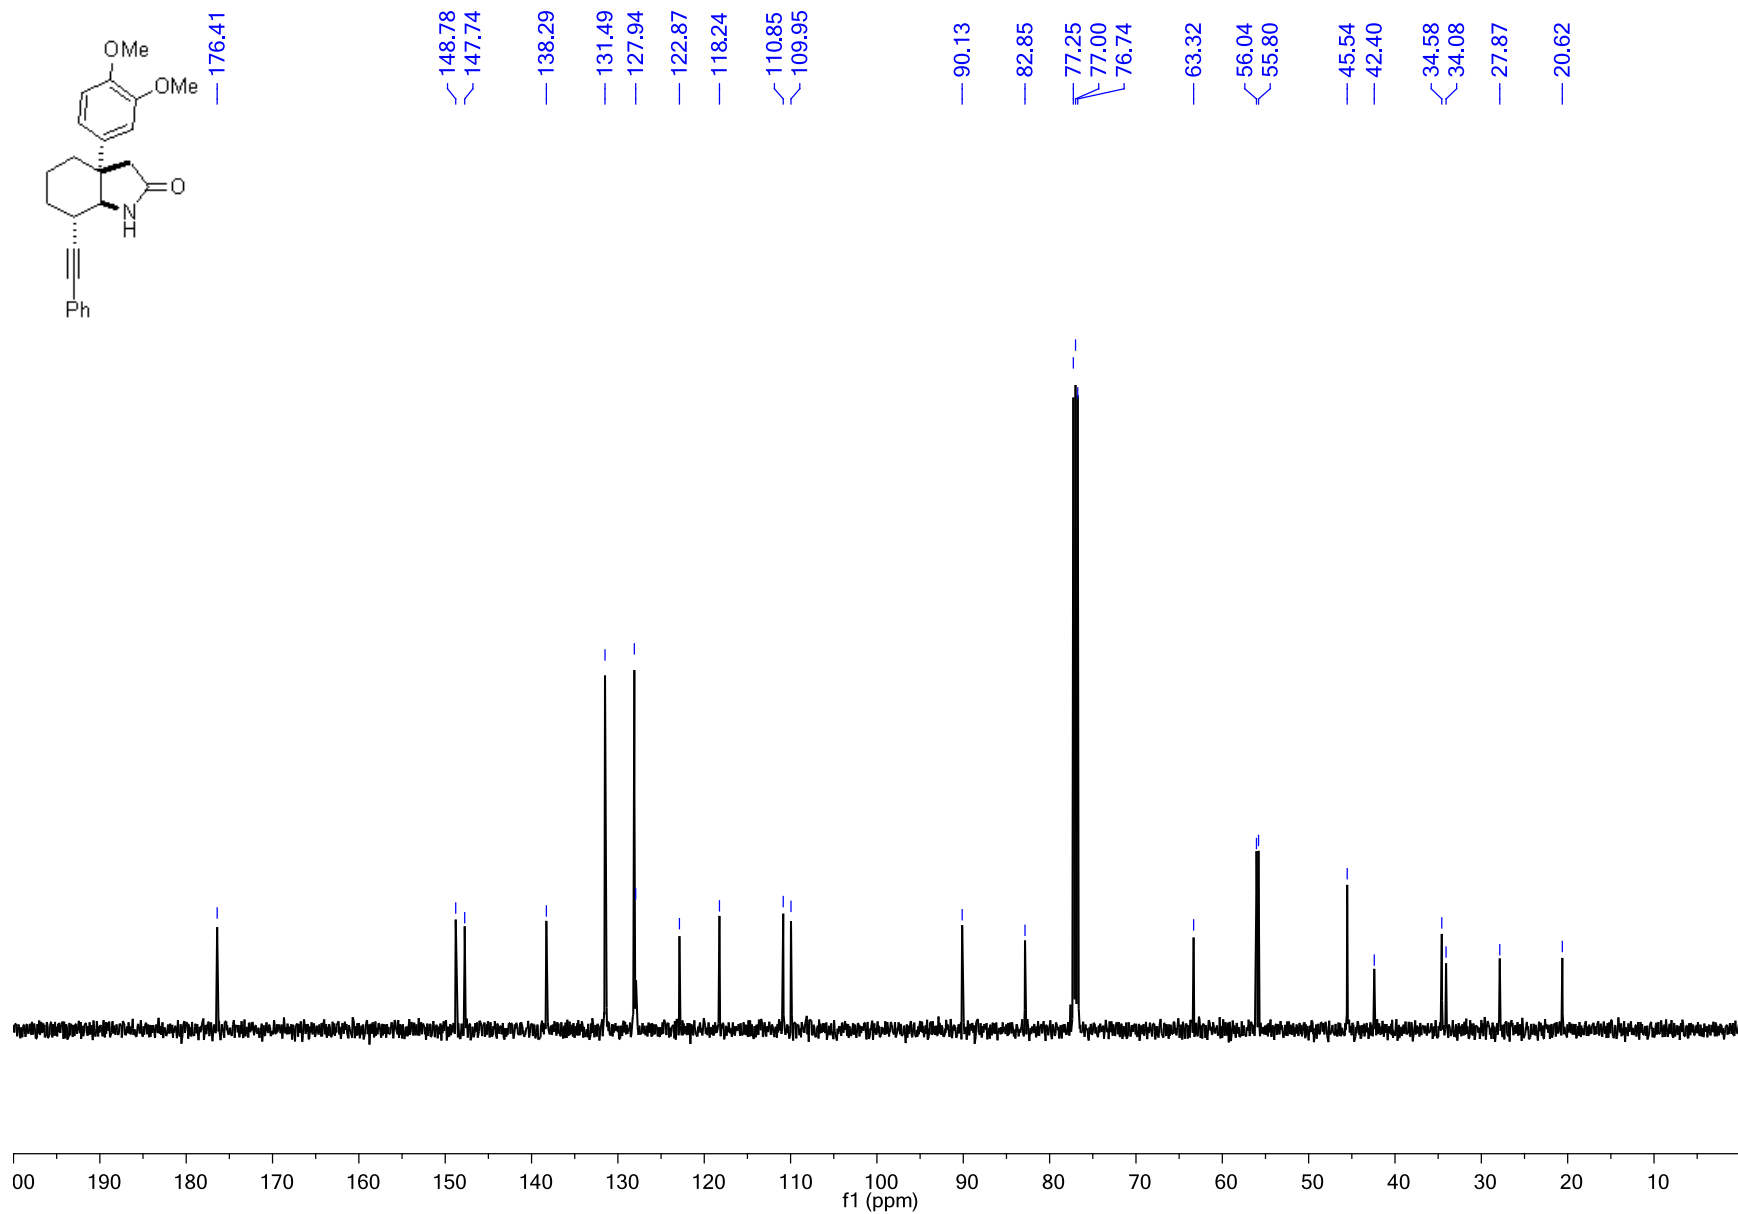

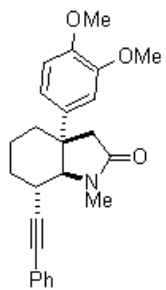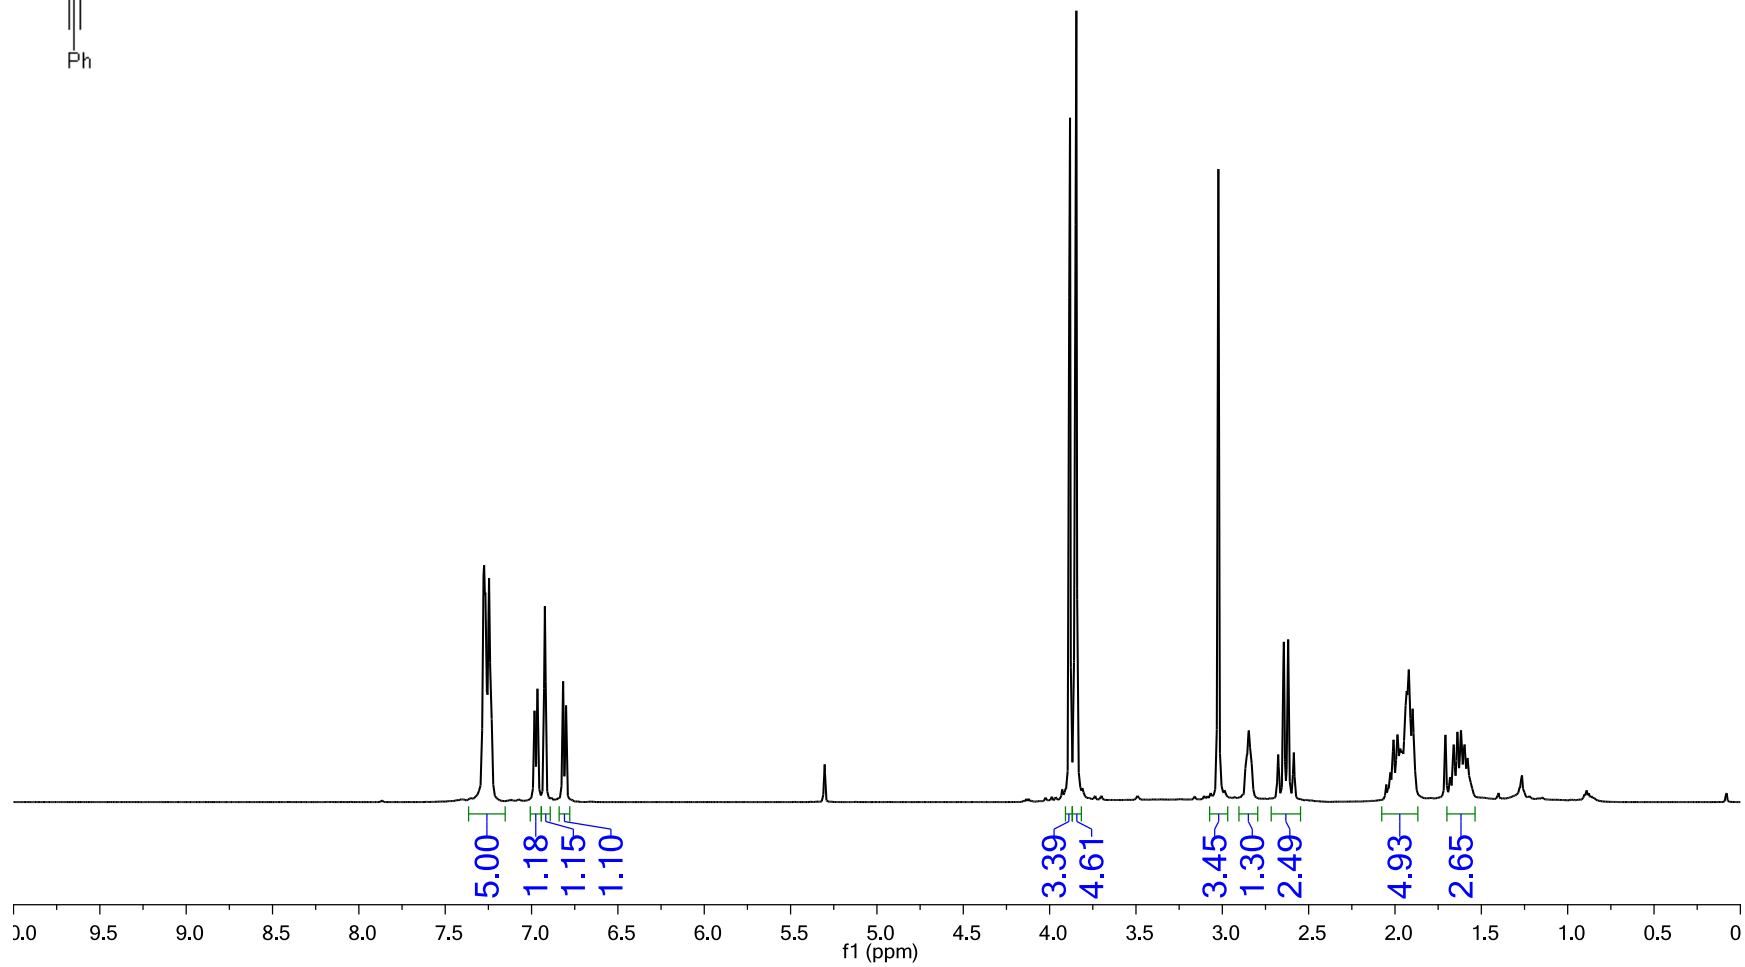

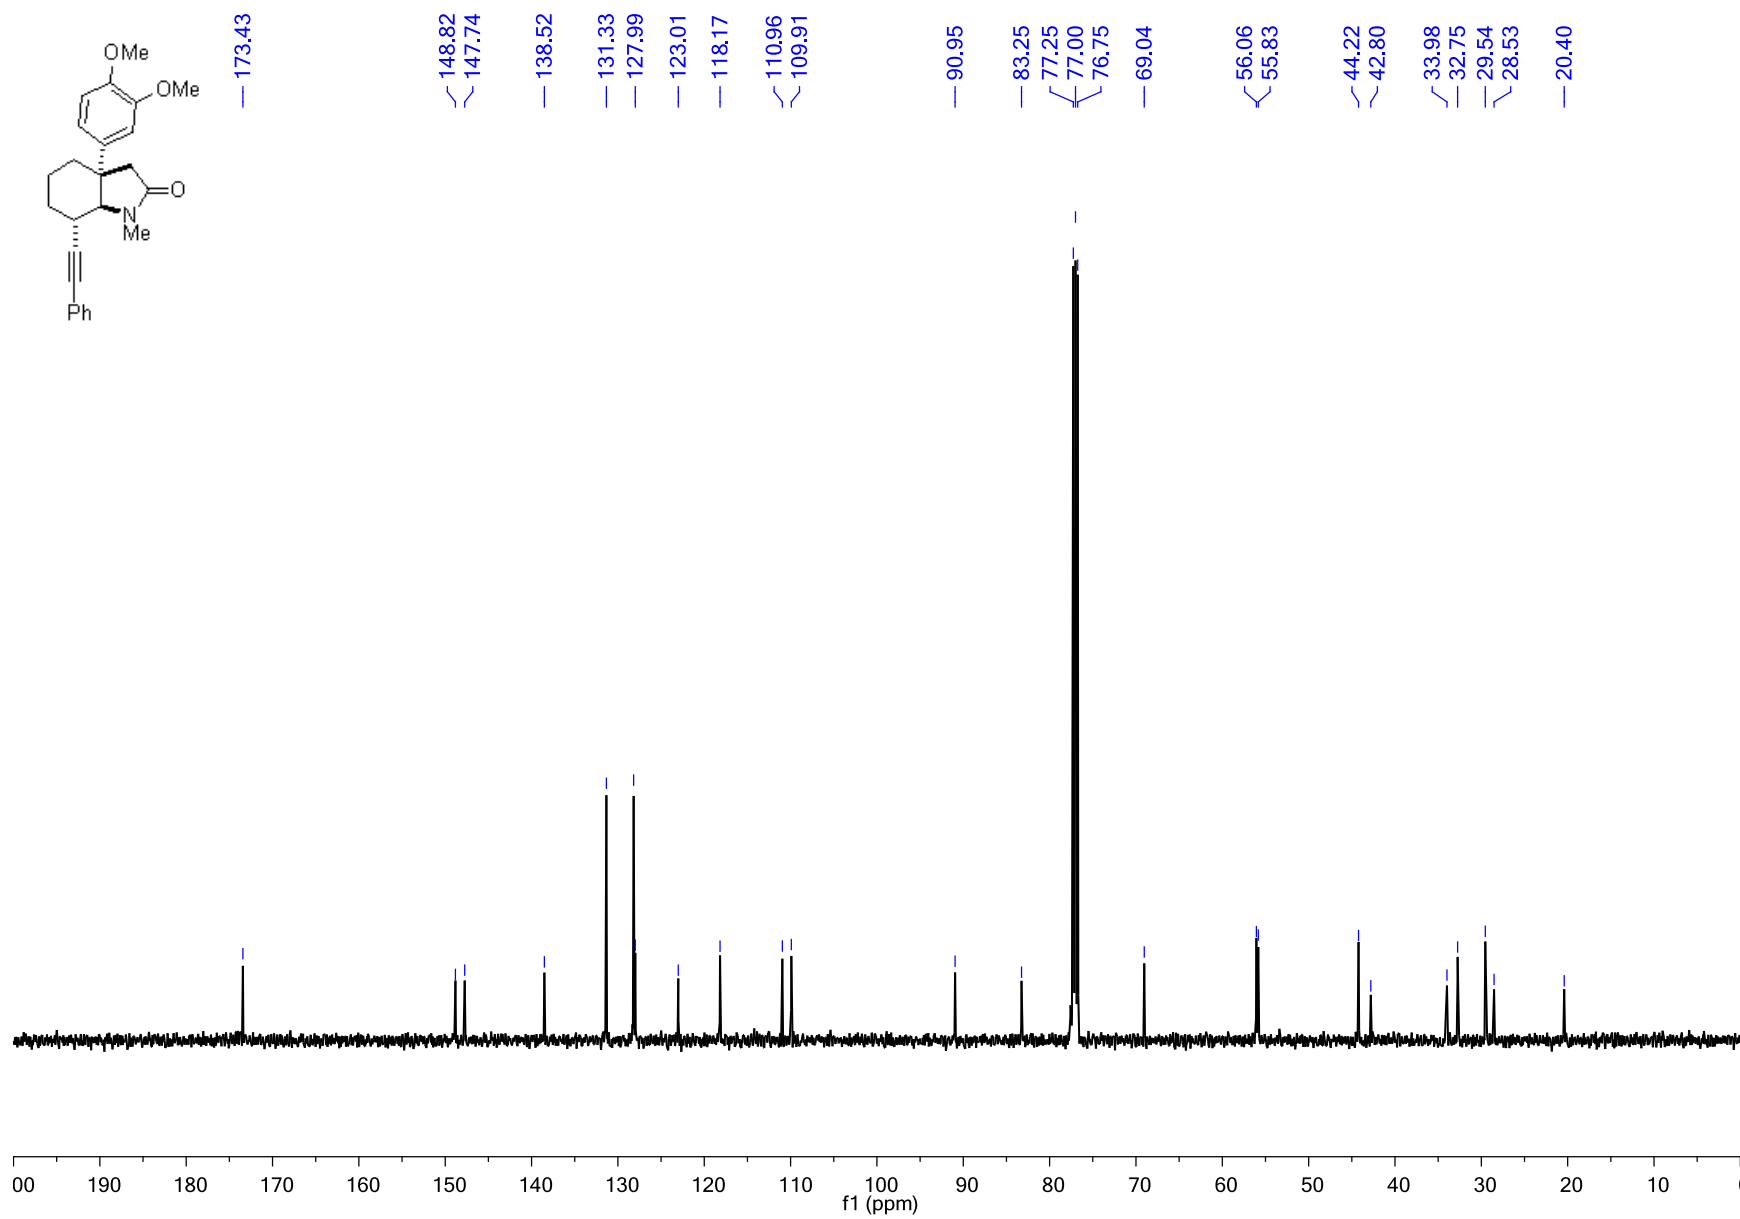

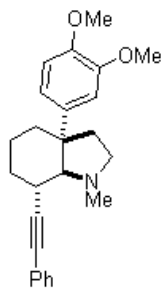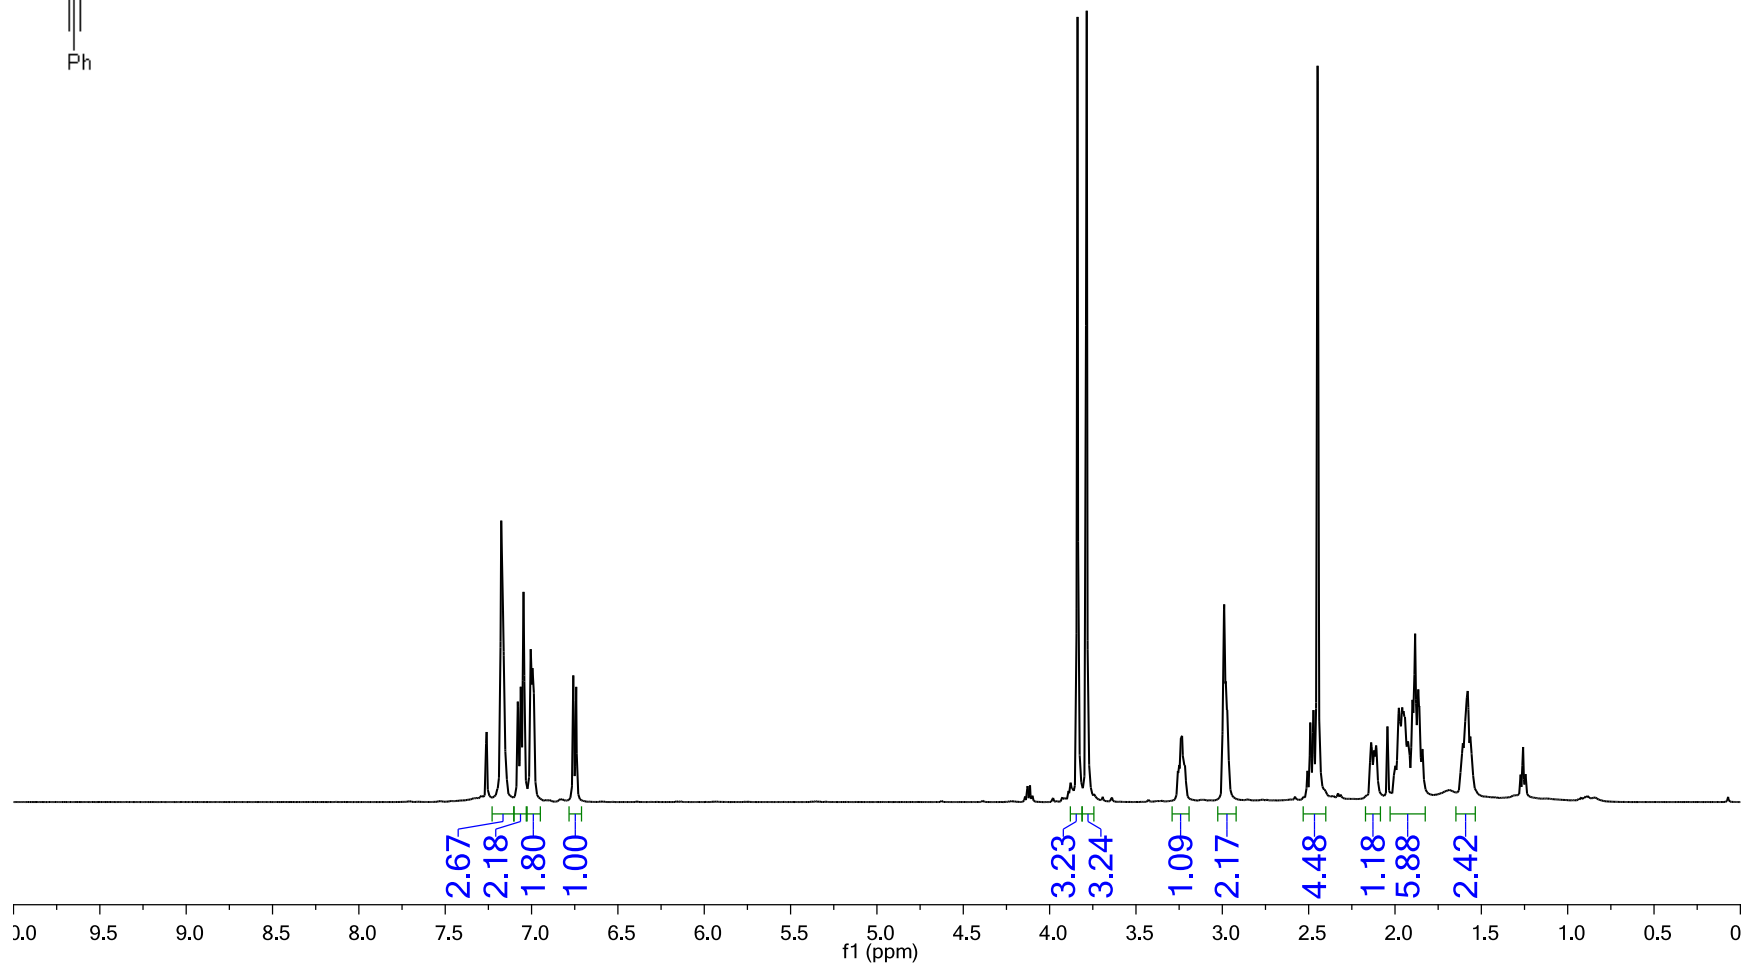

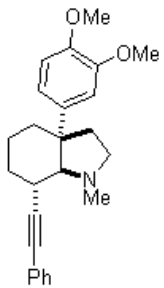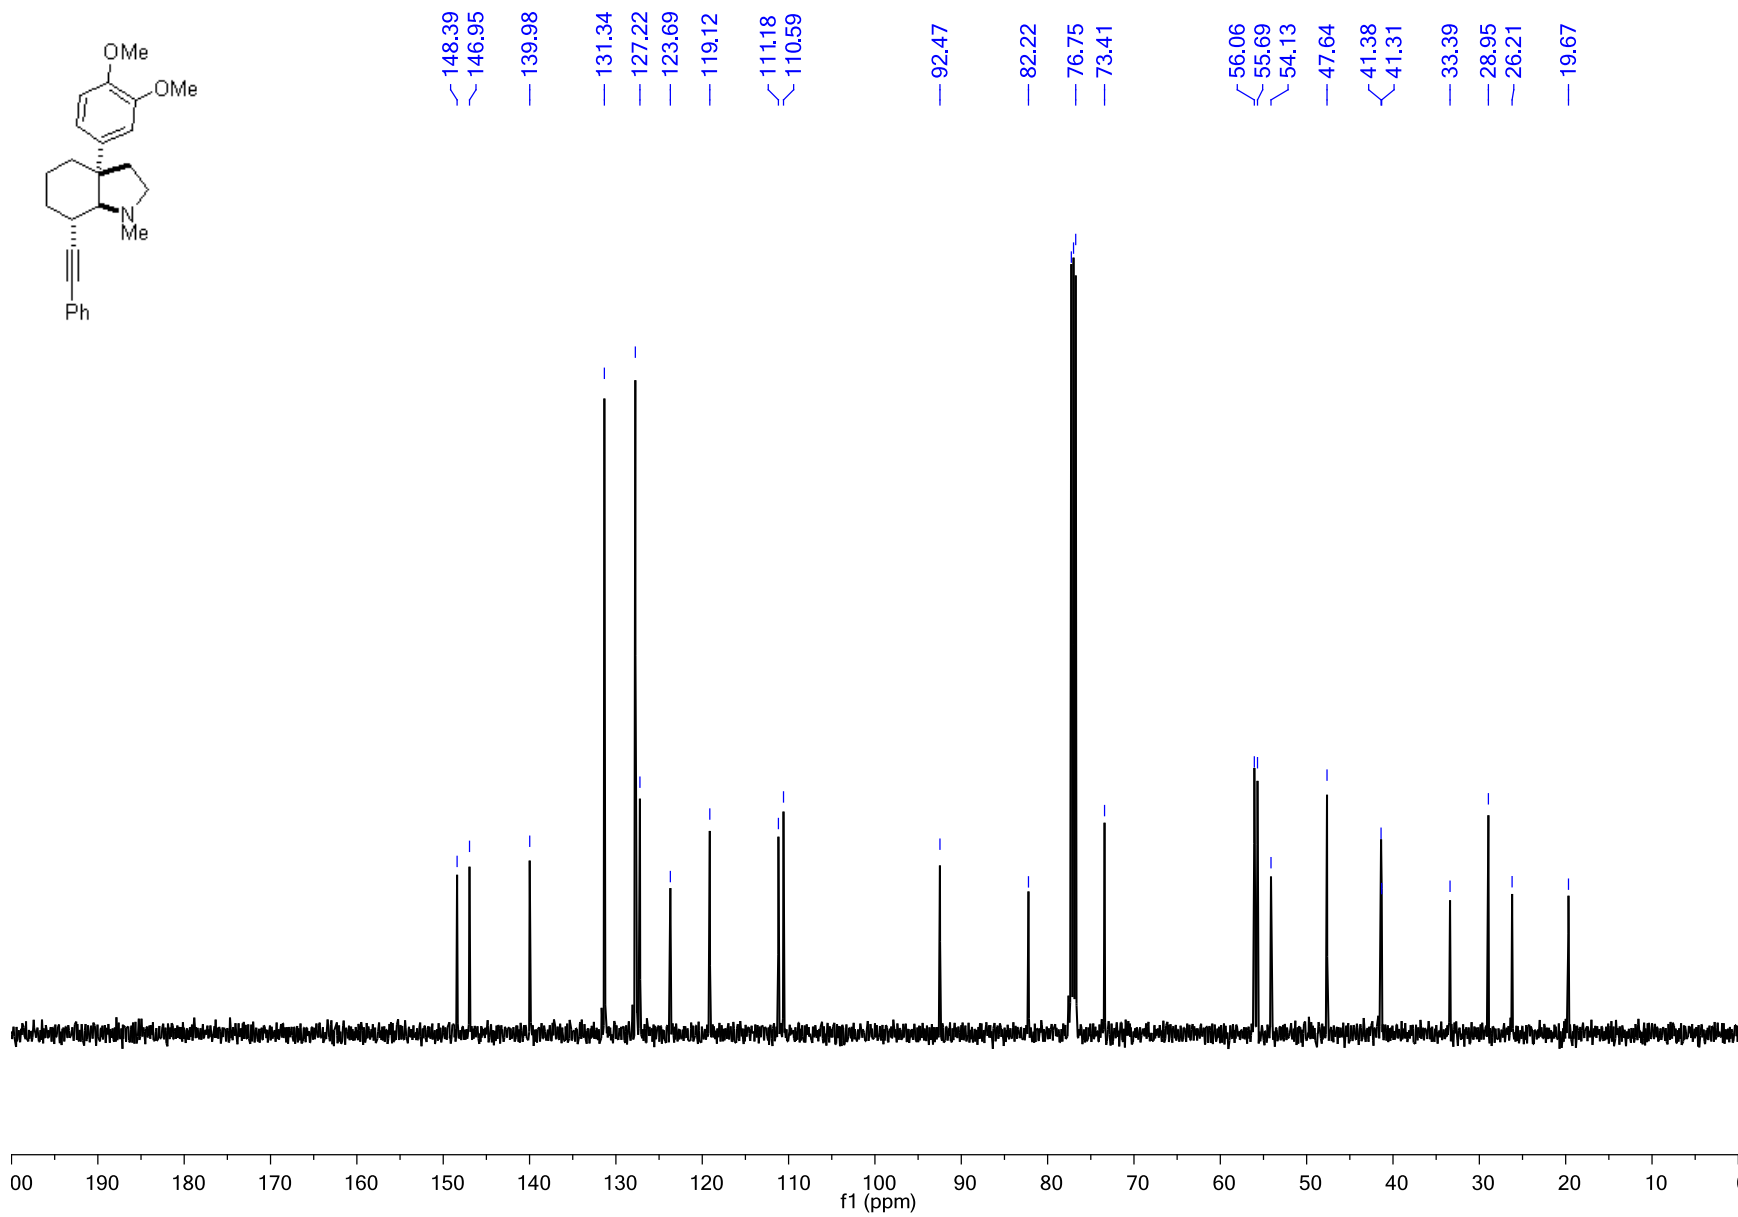

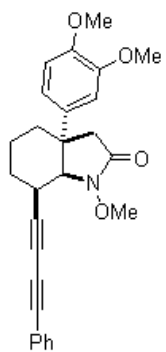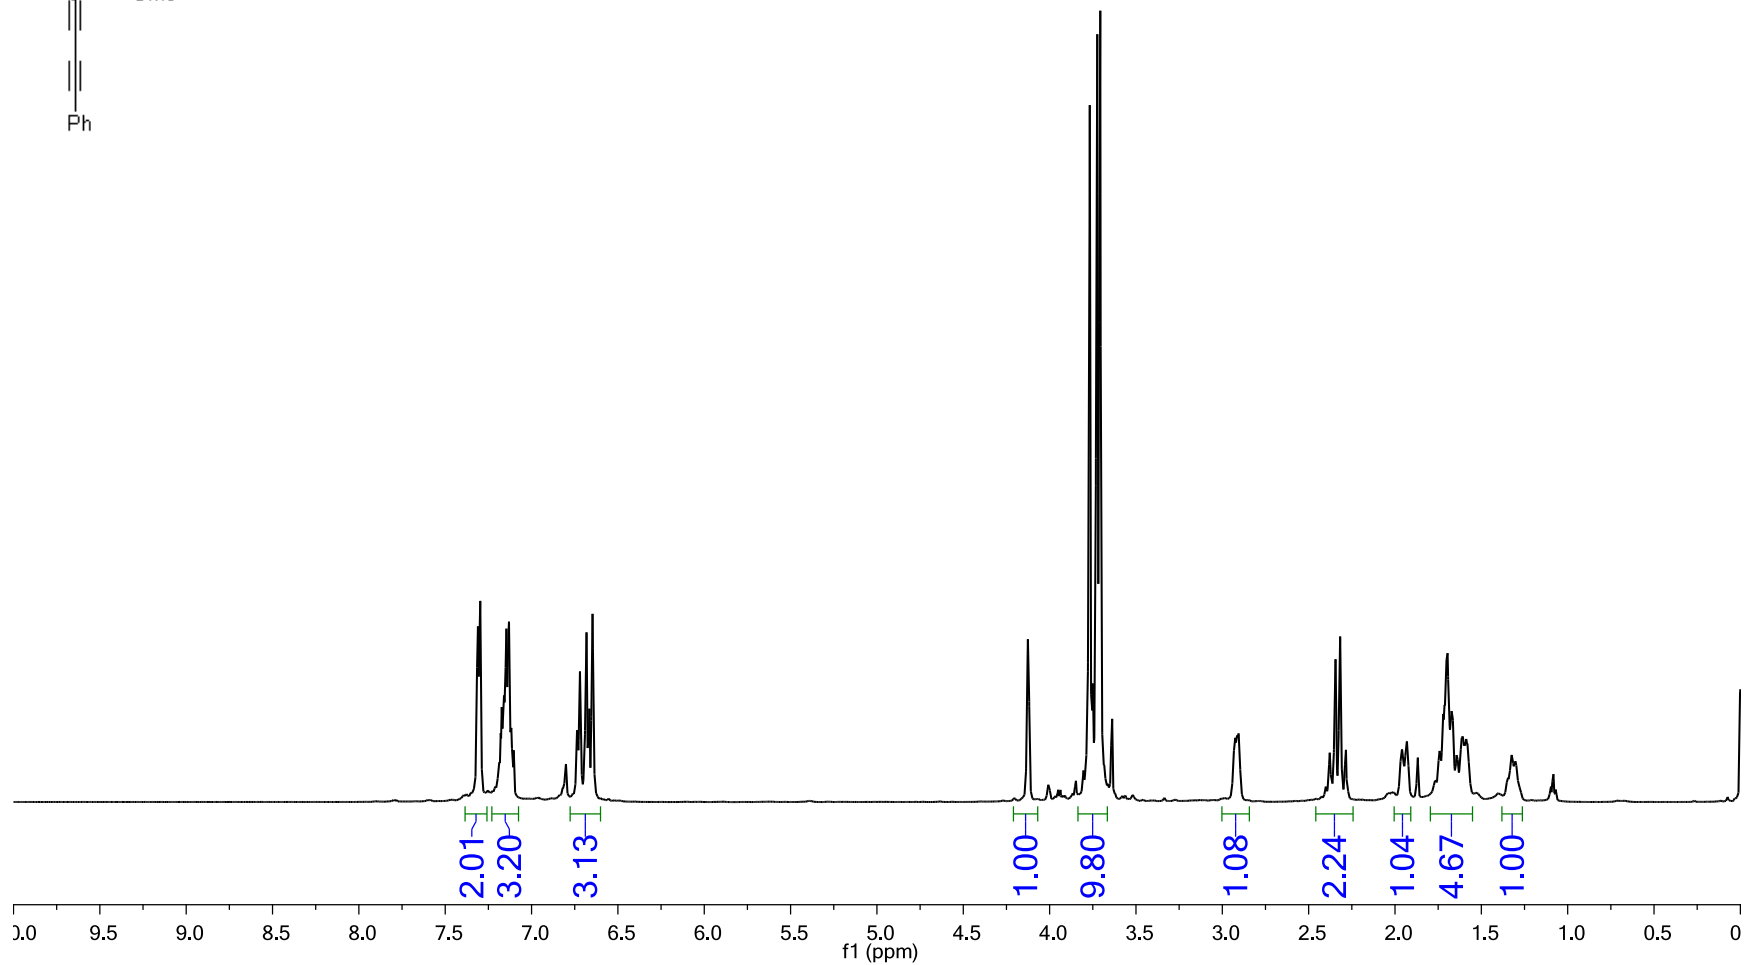

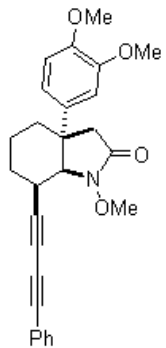

— 172.29

— 149.13  
— 147.99

— 135.44  
— 132.45  
— 128.96  
— 128.28  
— 121.66  
— 118.28  
— 111.03  
— 109.62

— 83.53  
— 77.00  
— 76.74  
— 76.23  
— 73.79  
— 66.98  
— 62.82

— 56.02  
— 55.85

— 45.17  
— 40.66

— 33.41  
— 29.57  
— 26.42  
— 21.07

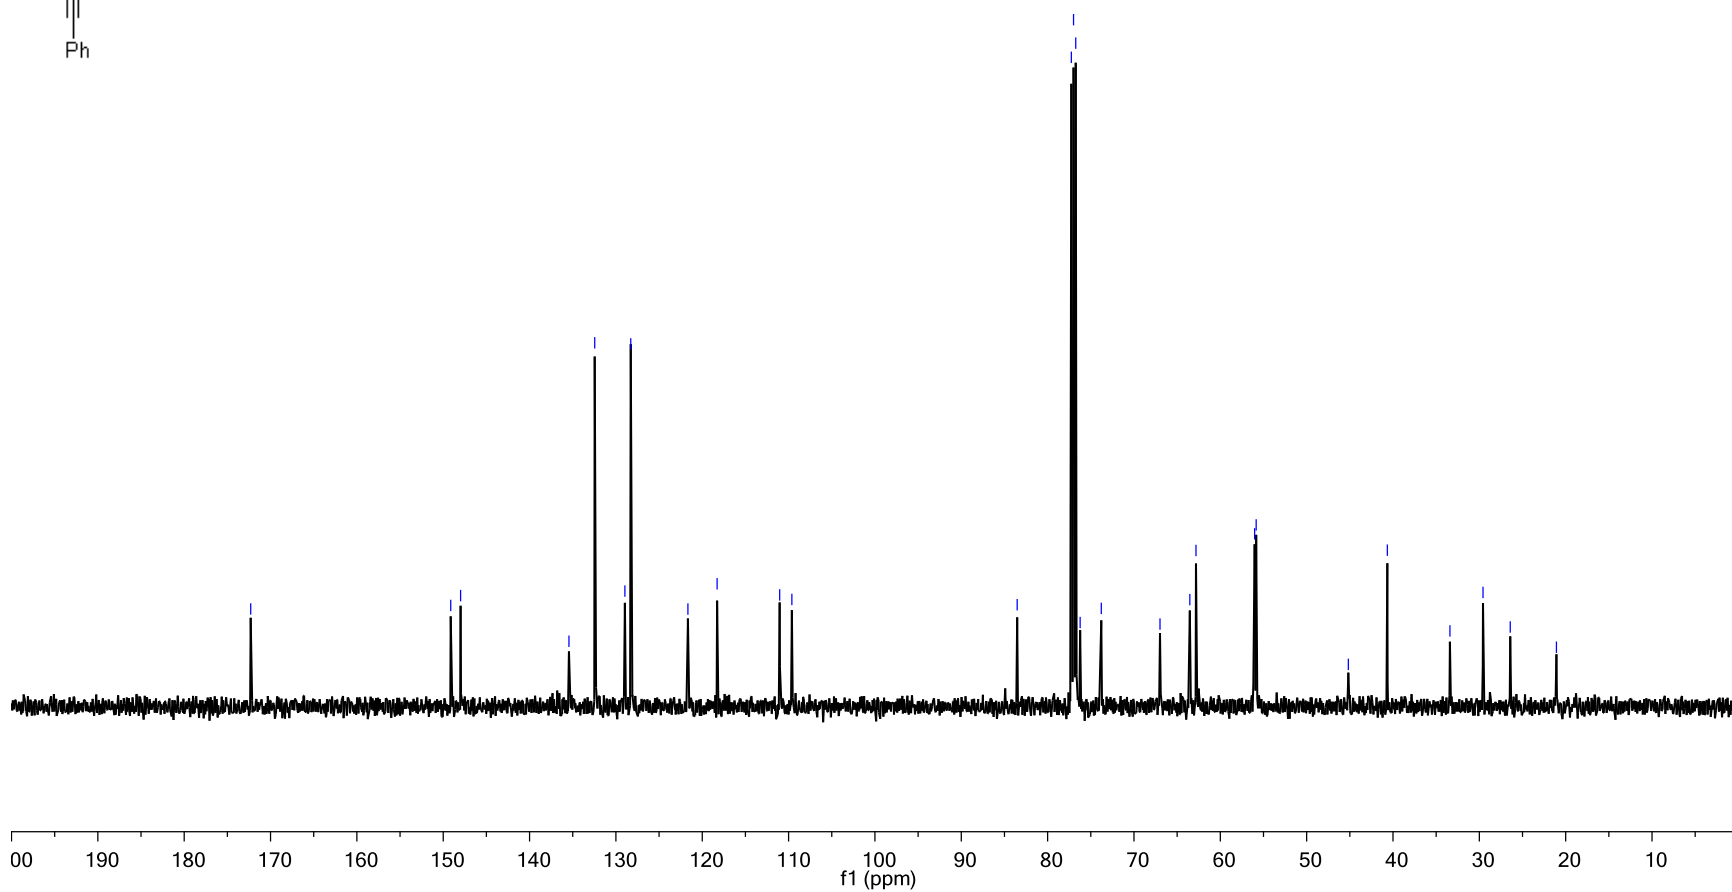

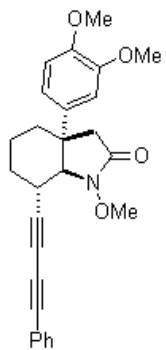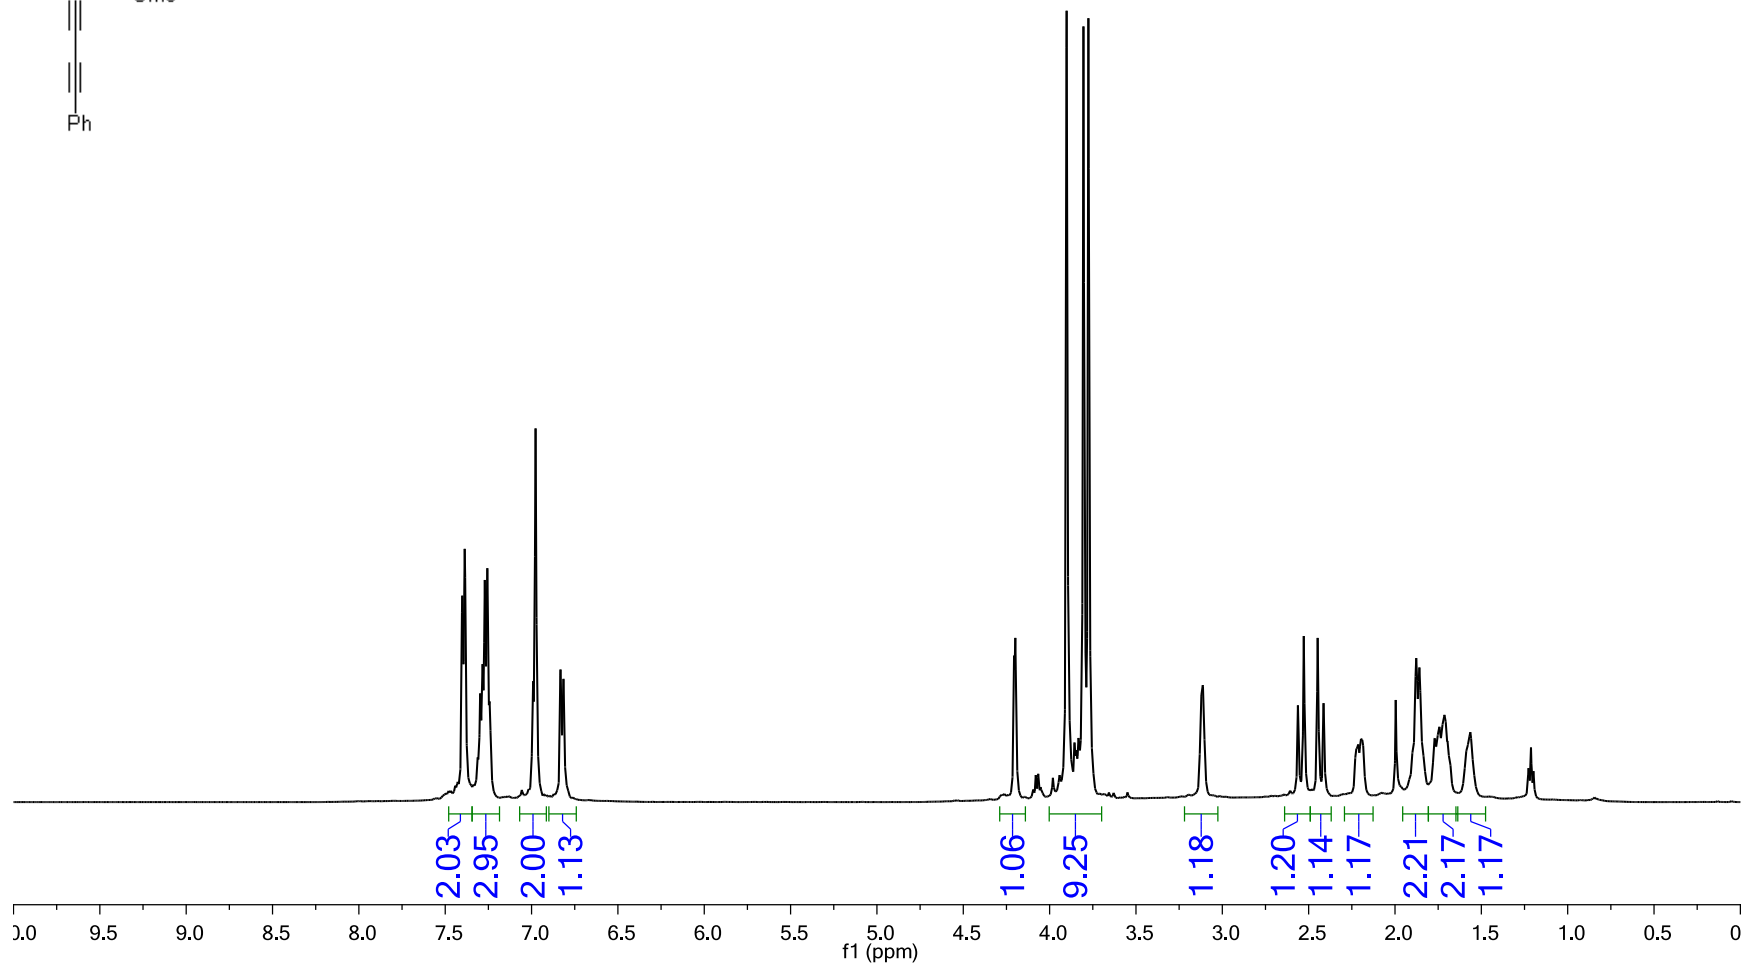



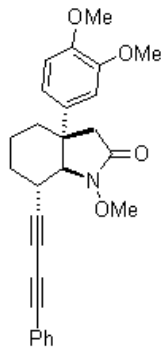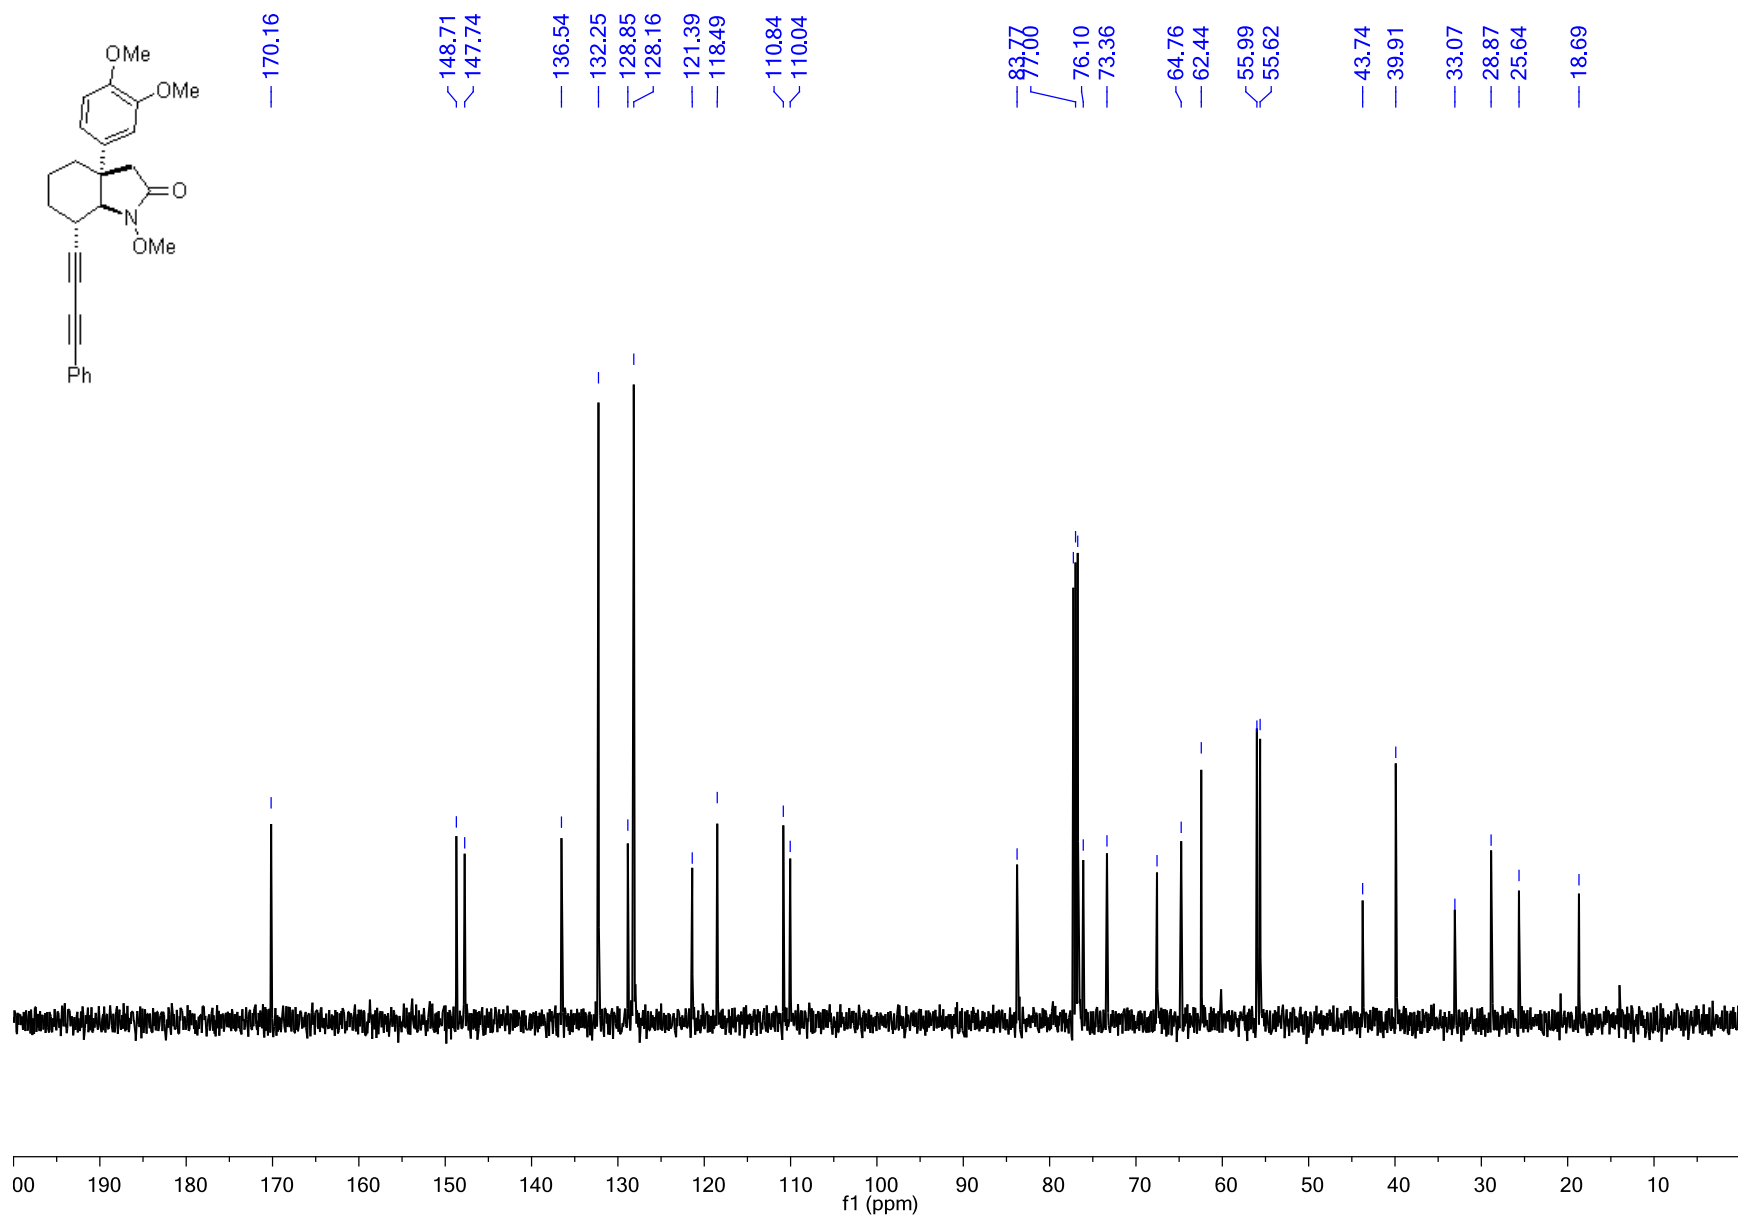

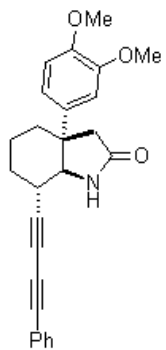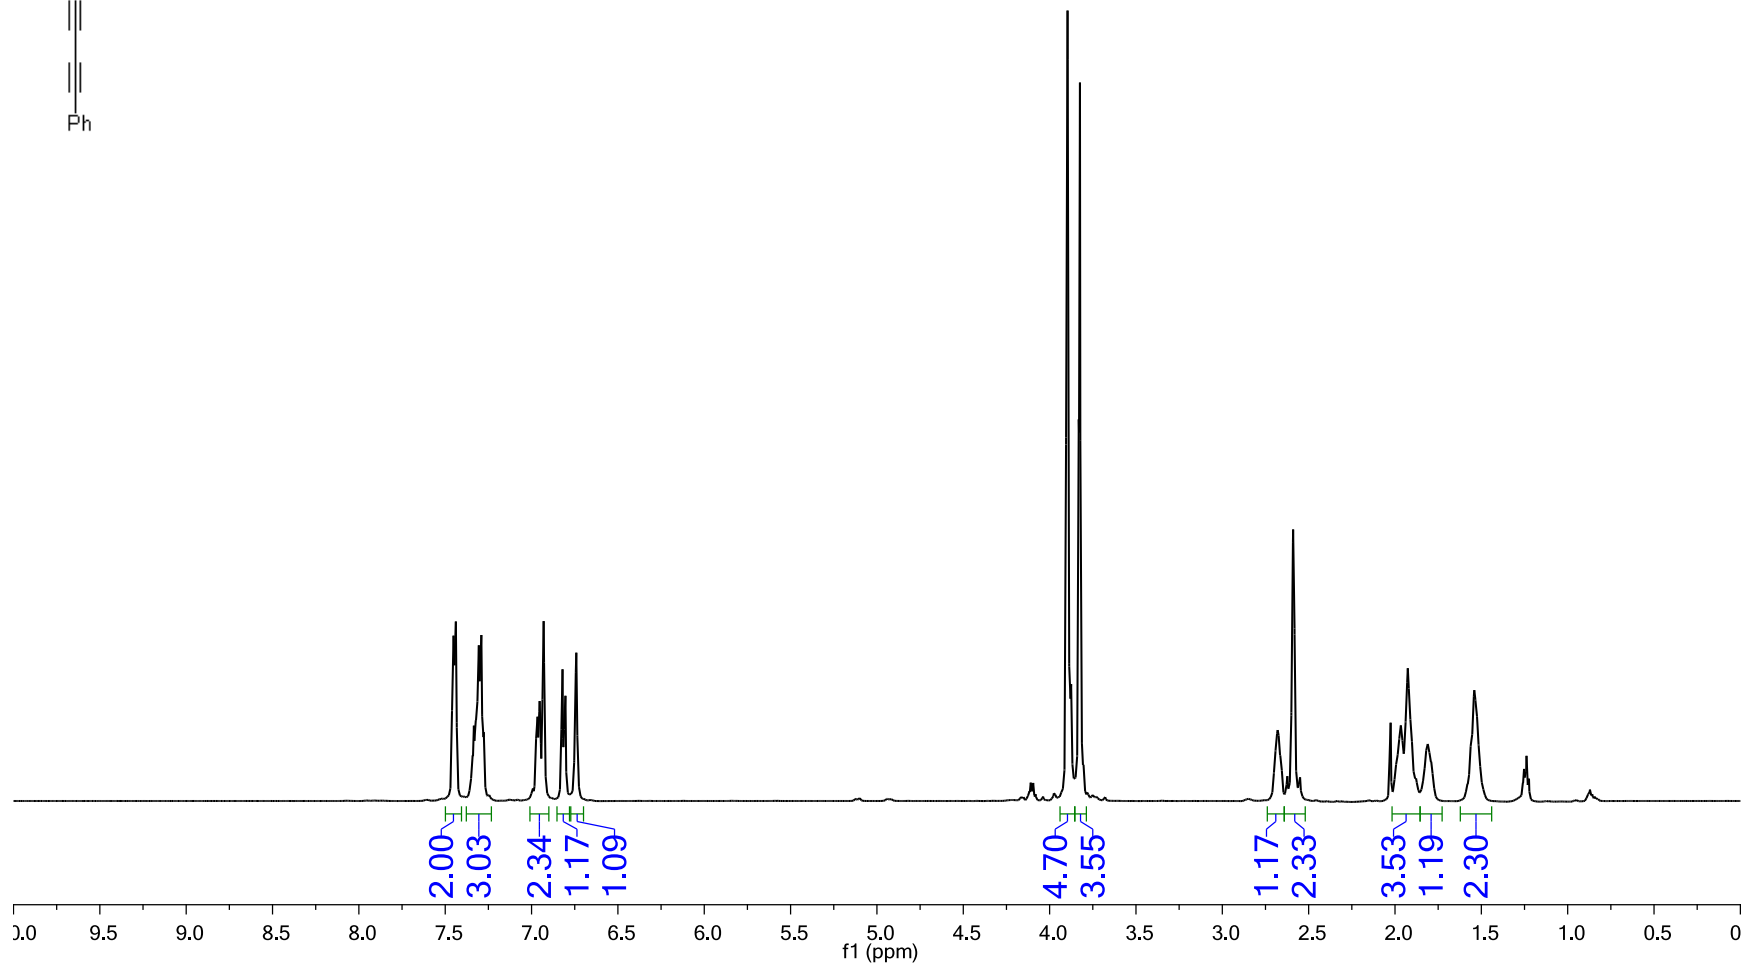

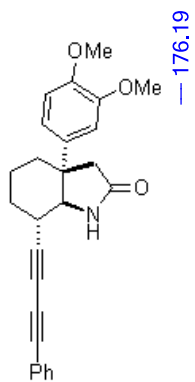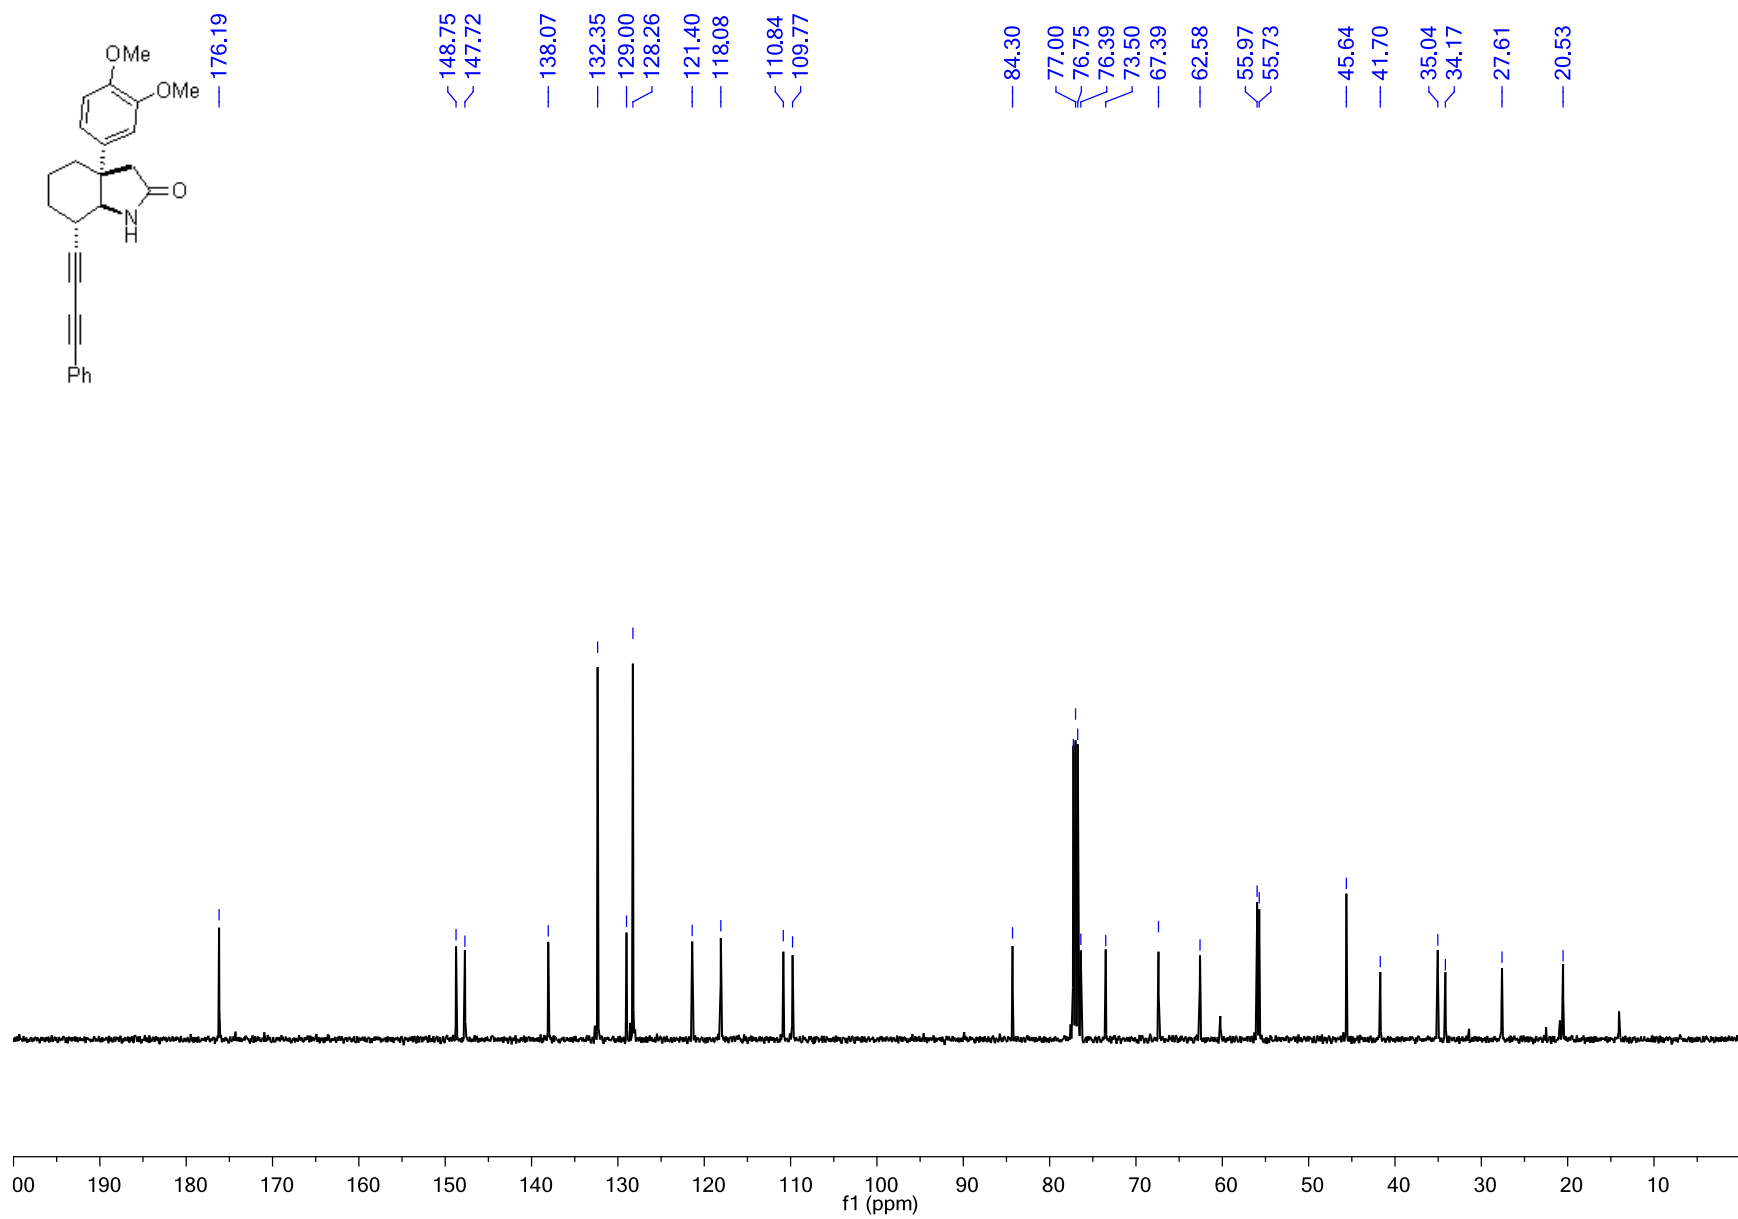

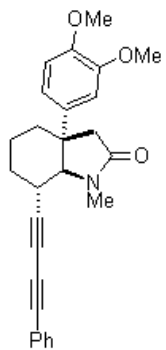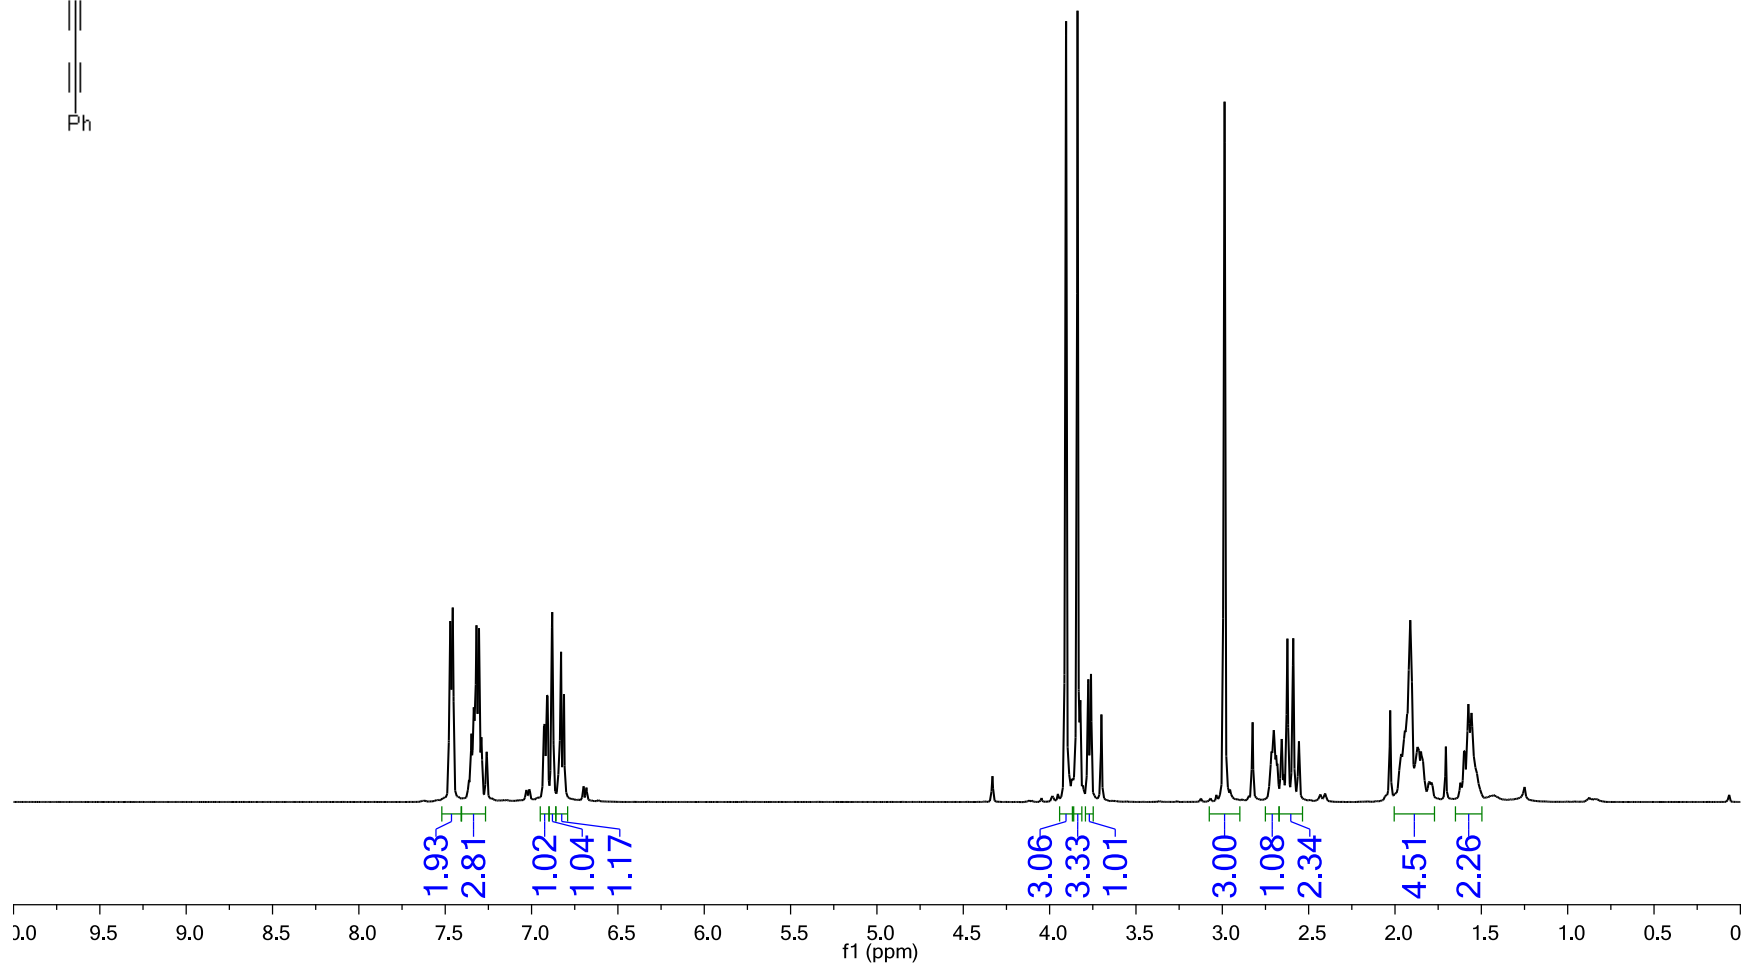

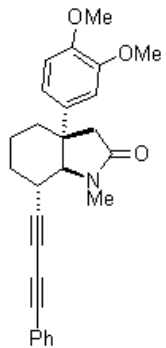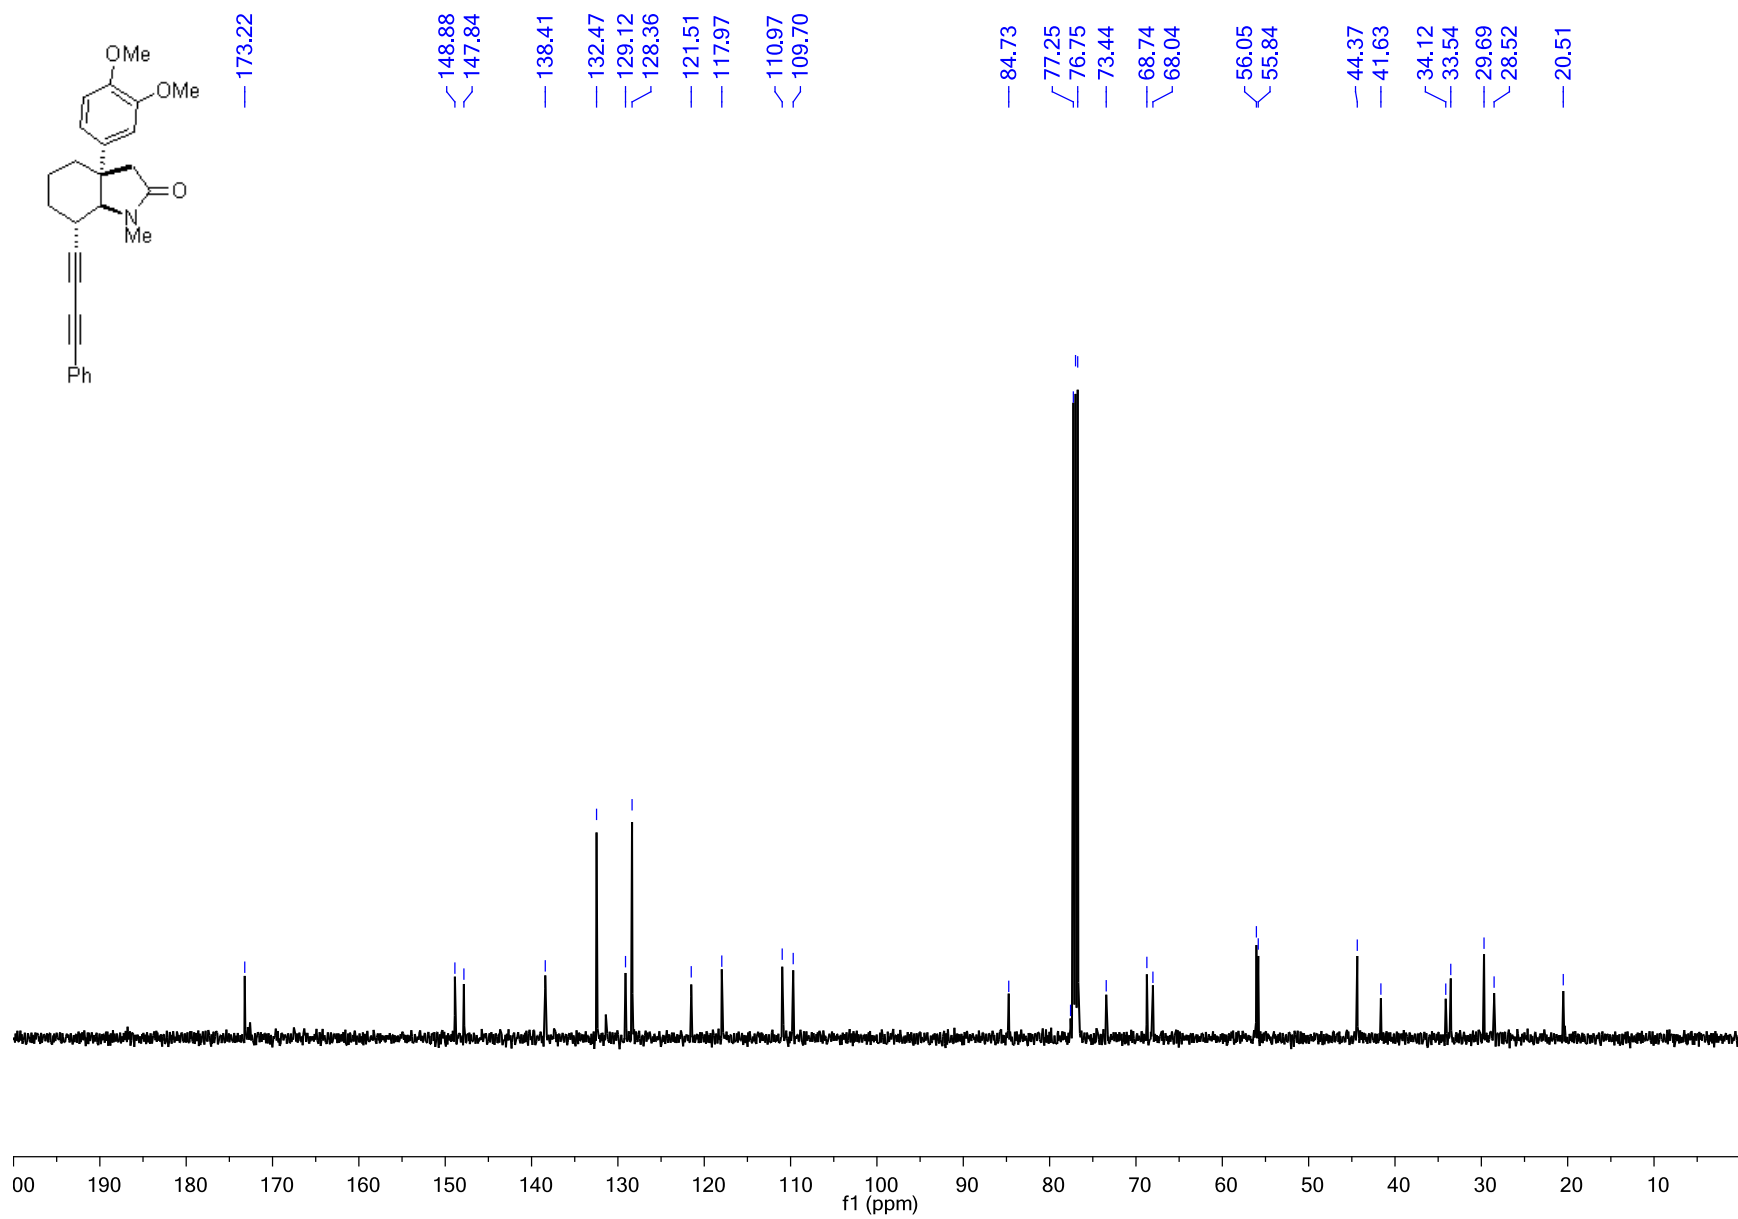

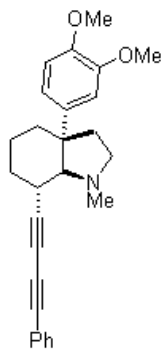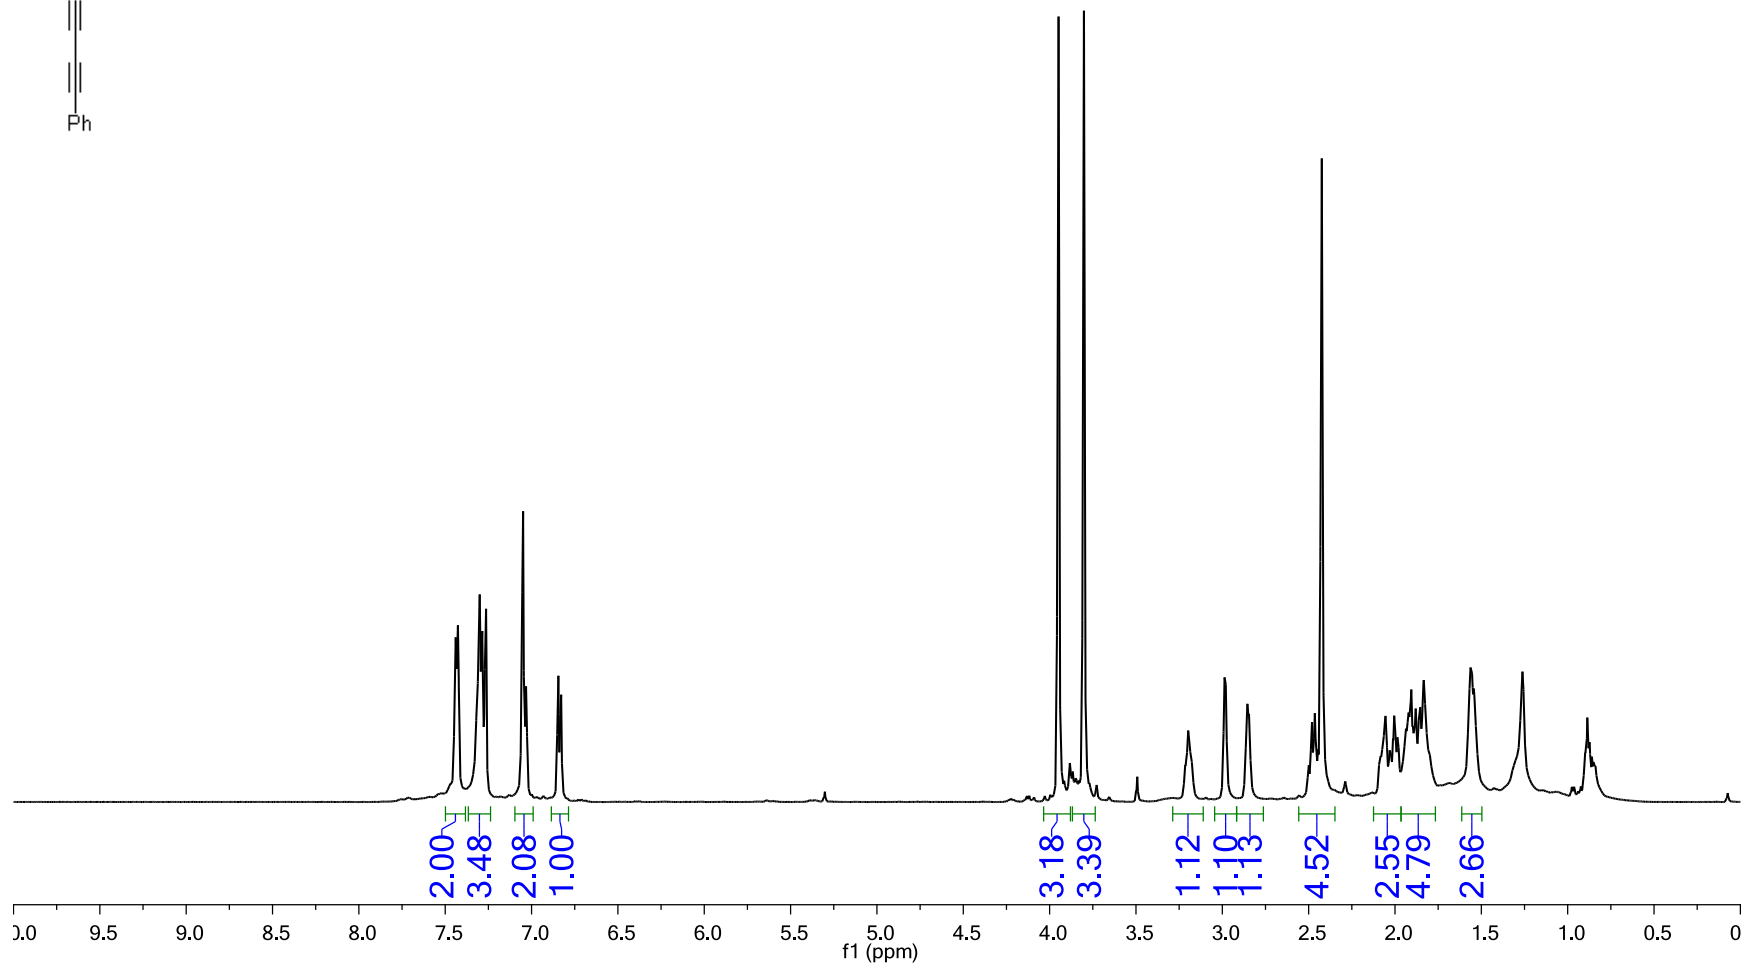

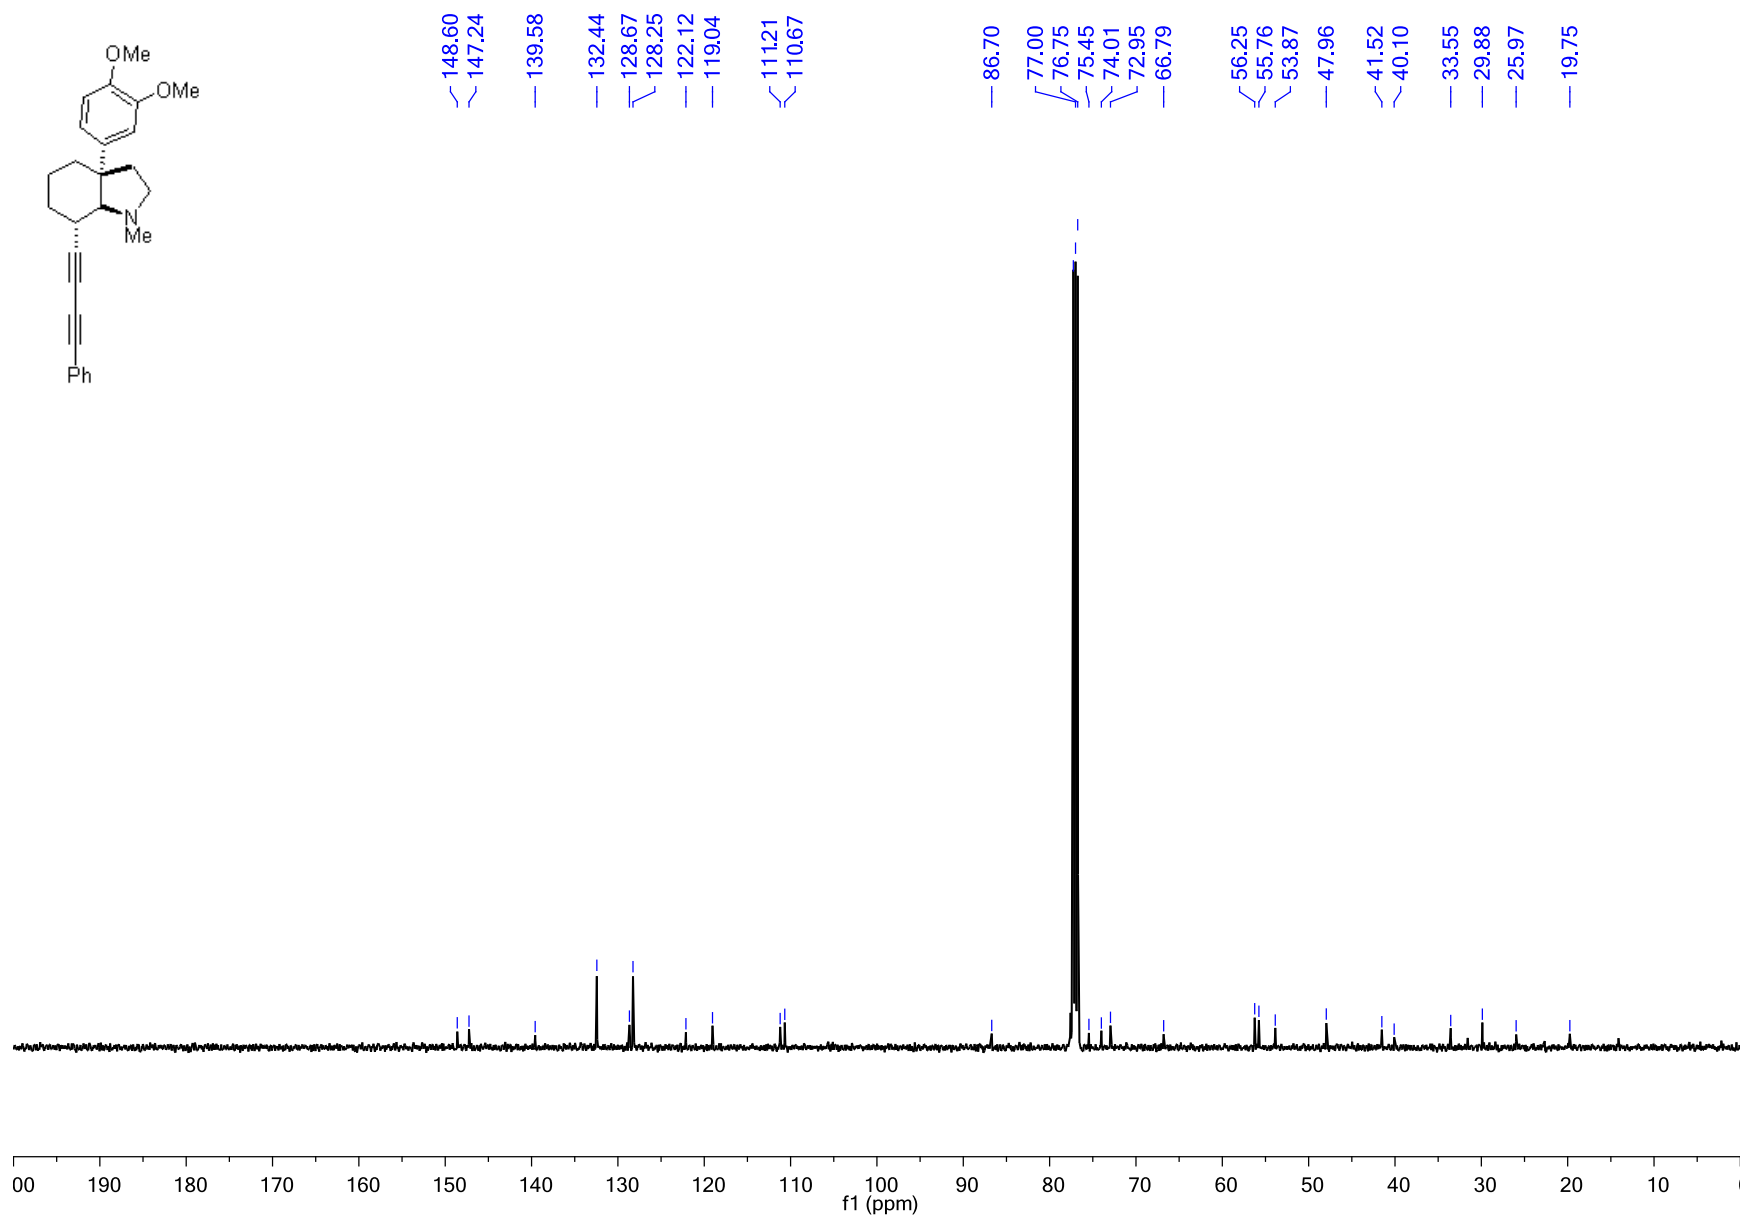

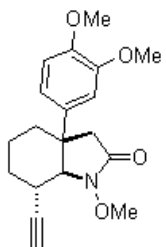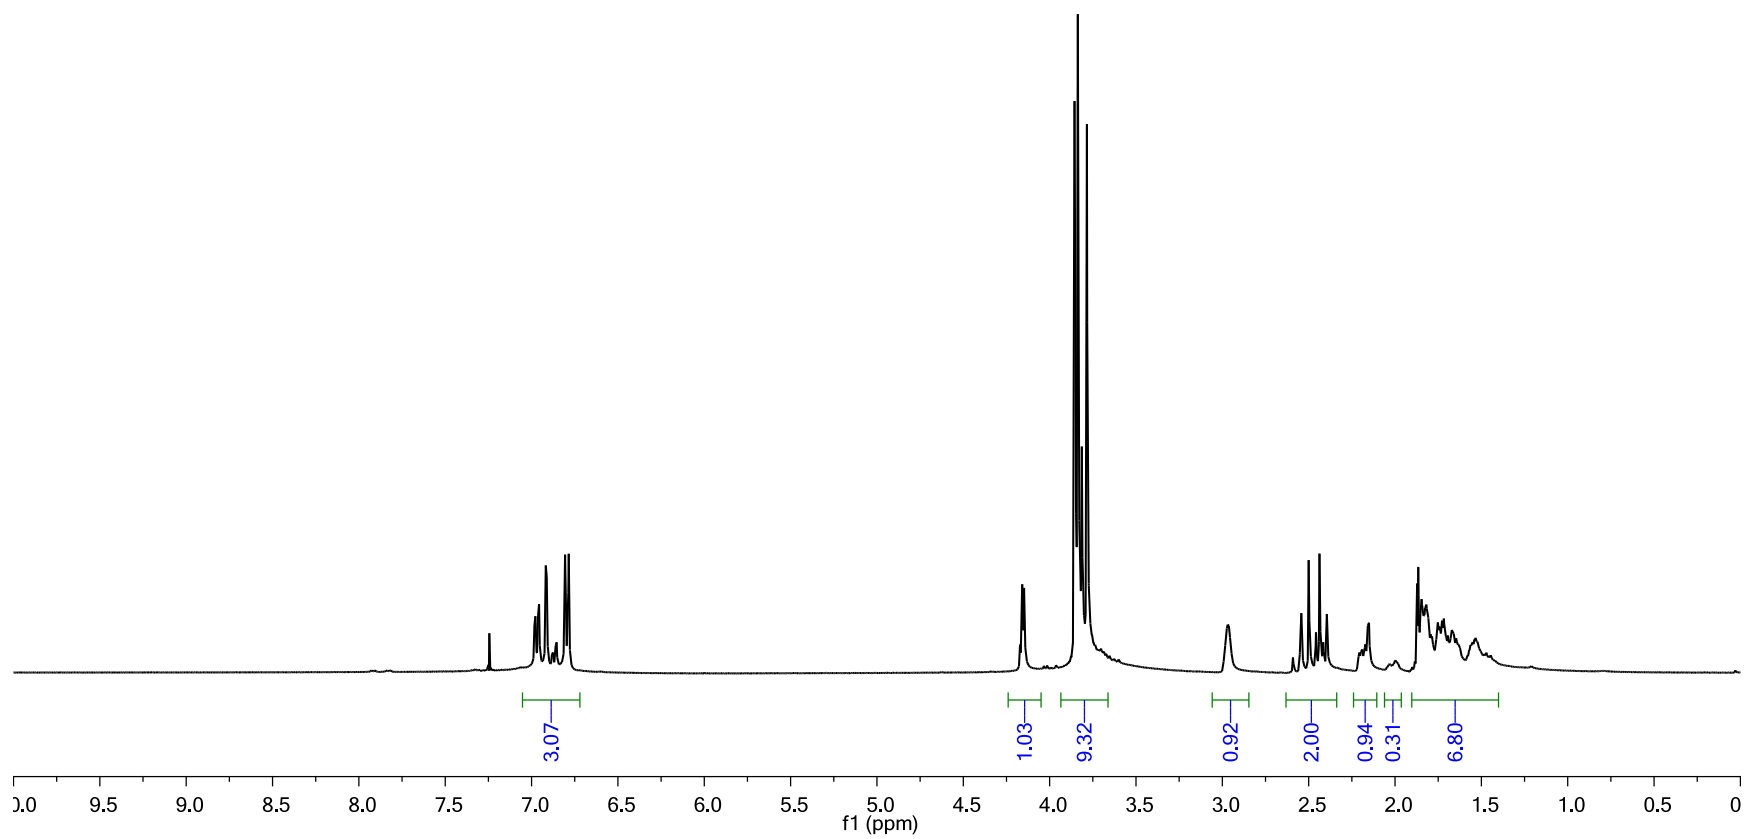



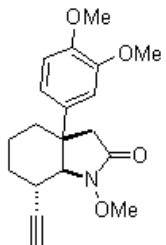

172.179  
170.098

148.925  
148.507  
147.787  
147.623

136.883  
136.247

118.483  
118.069  
110.897  
110.642  
110.007  
109.535

84.423  
83.871  
77.000  
76.746  
70.704  
68.698  
62.599  
62.421

55.923  
55.691

44.052  
43.806  
39.986  
33.743  
33.091

25.993  
20.437  
18.550

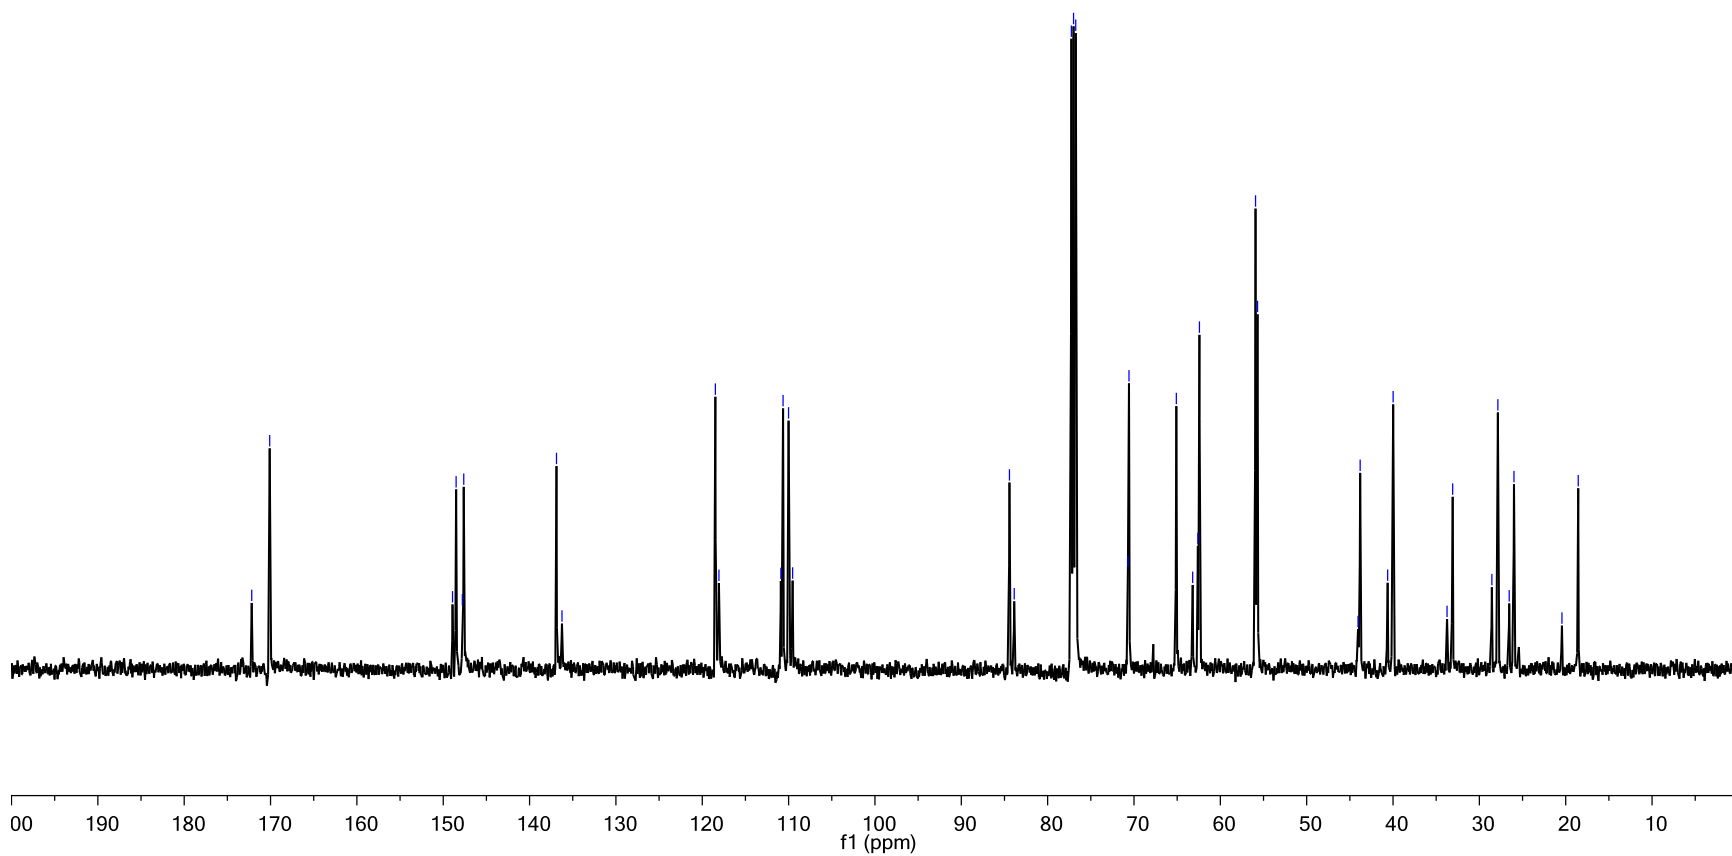

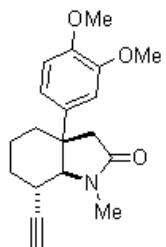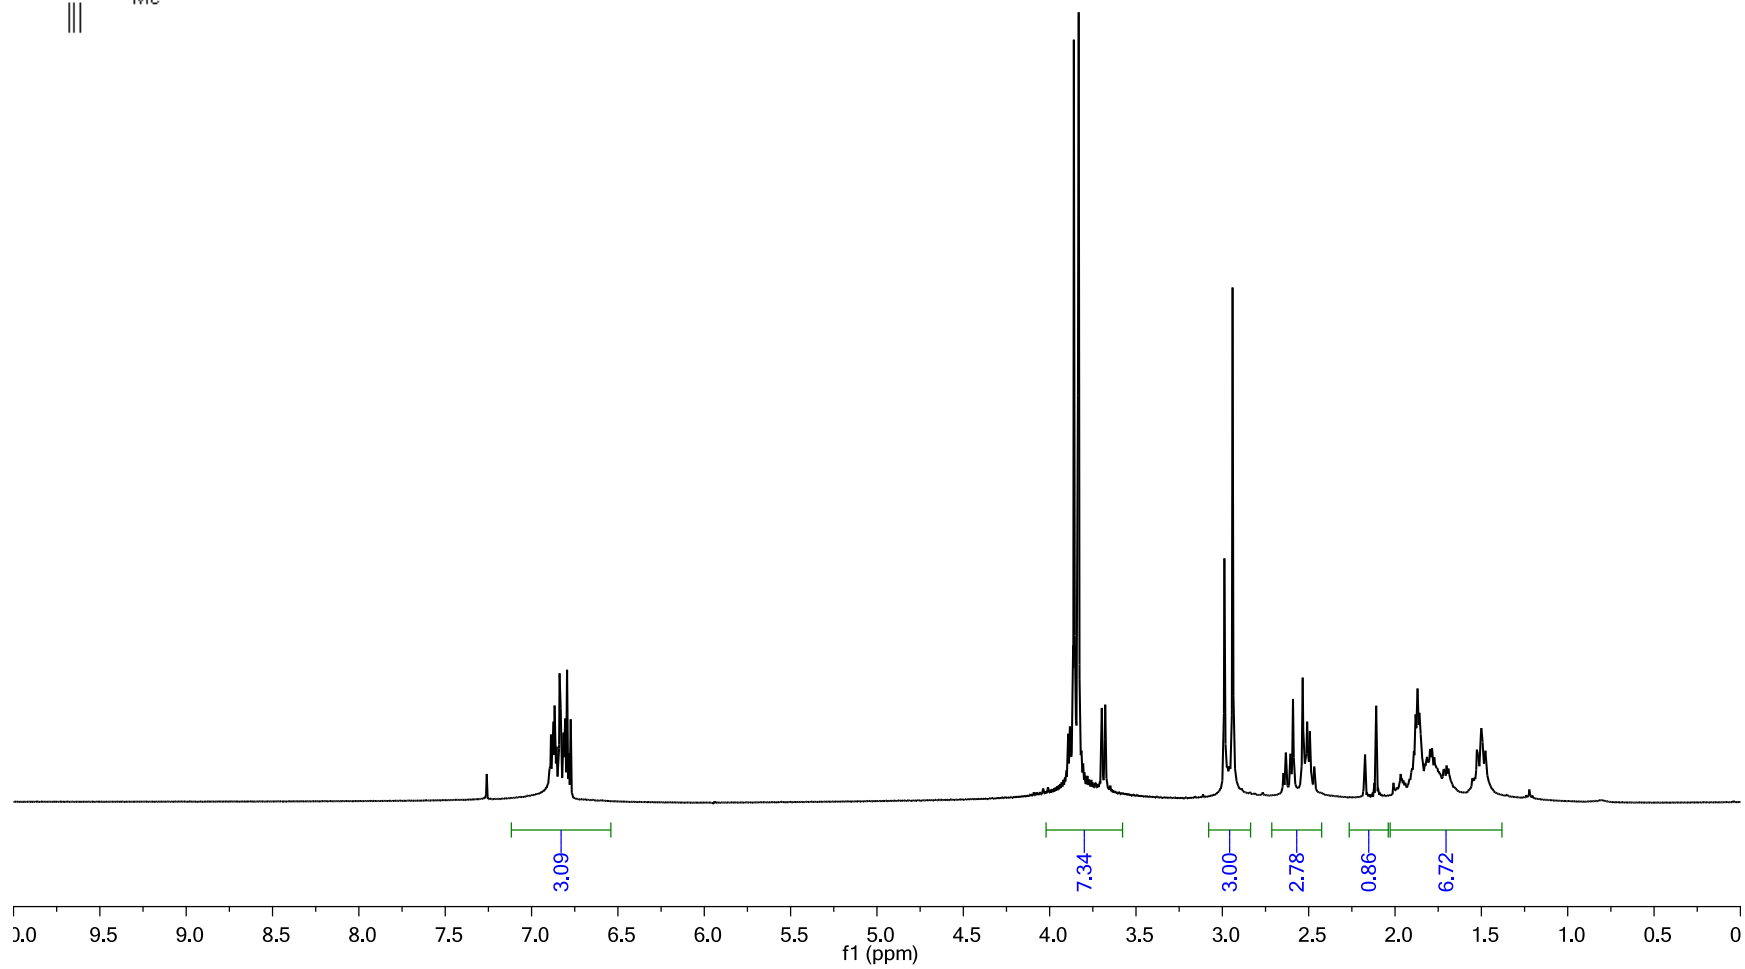

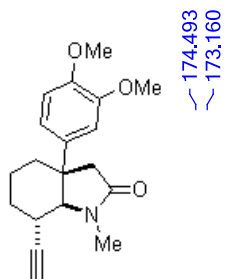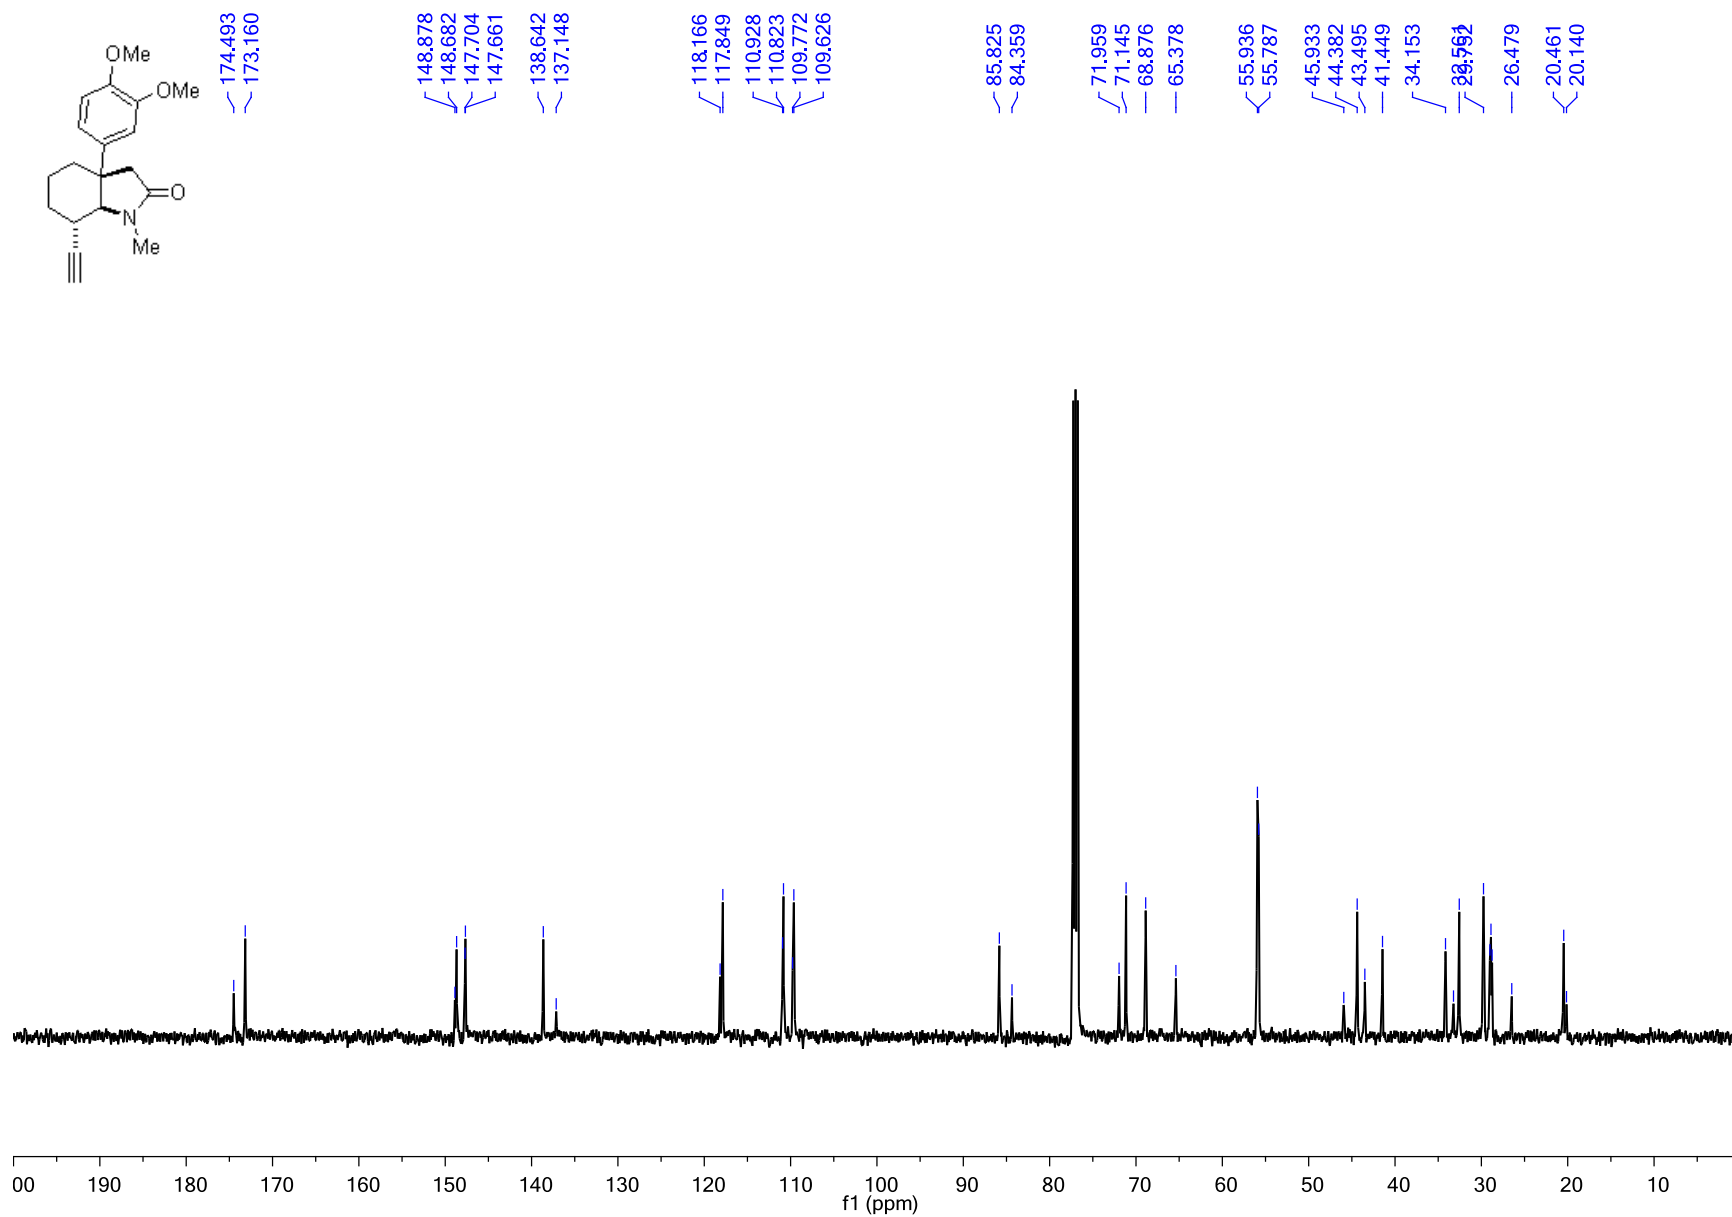

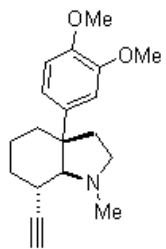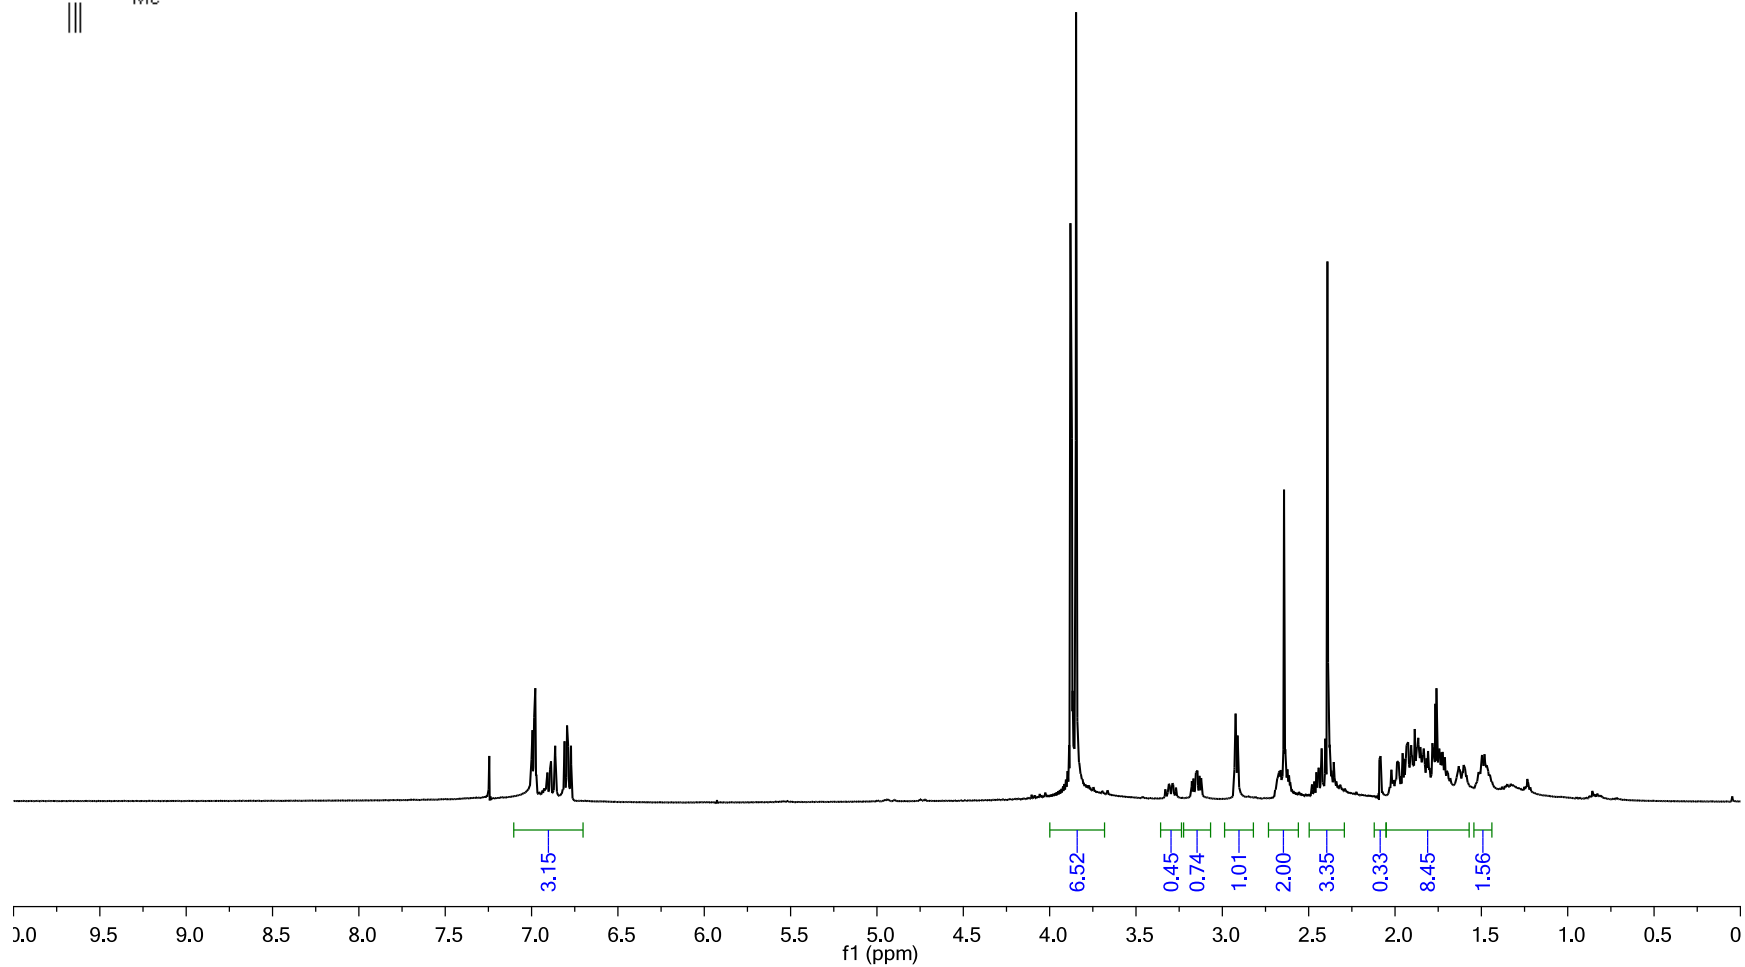

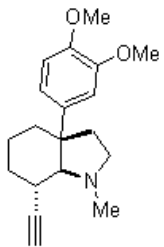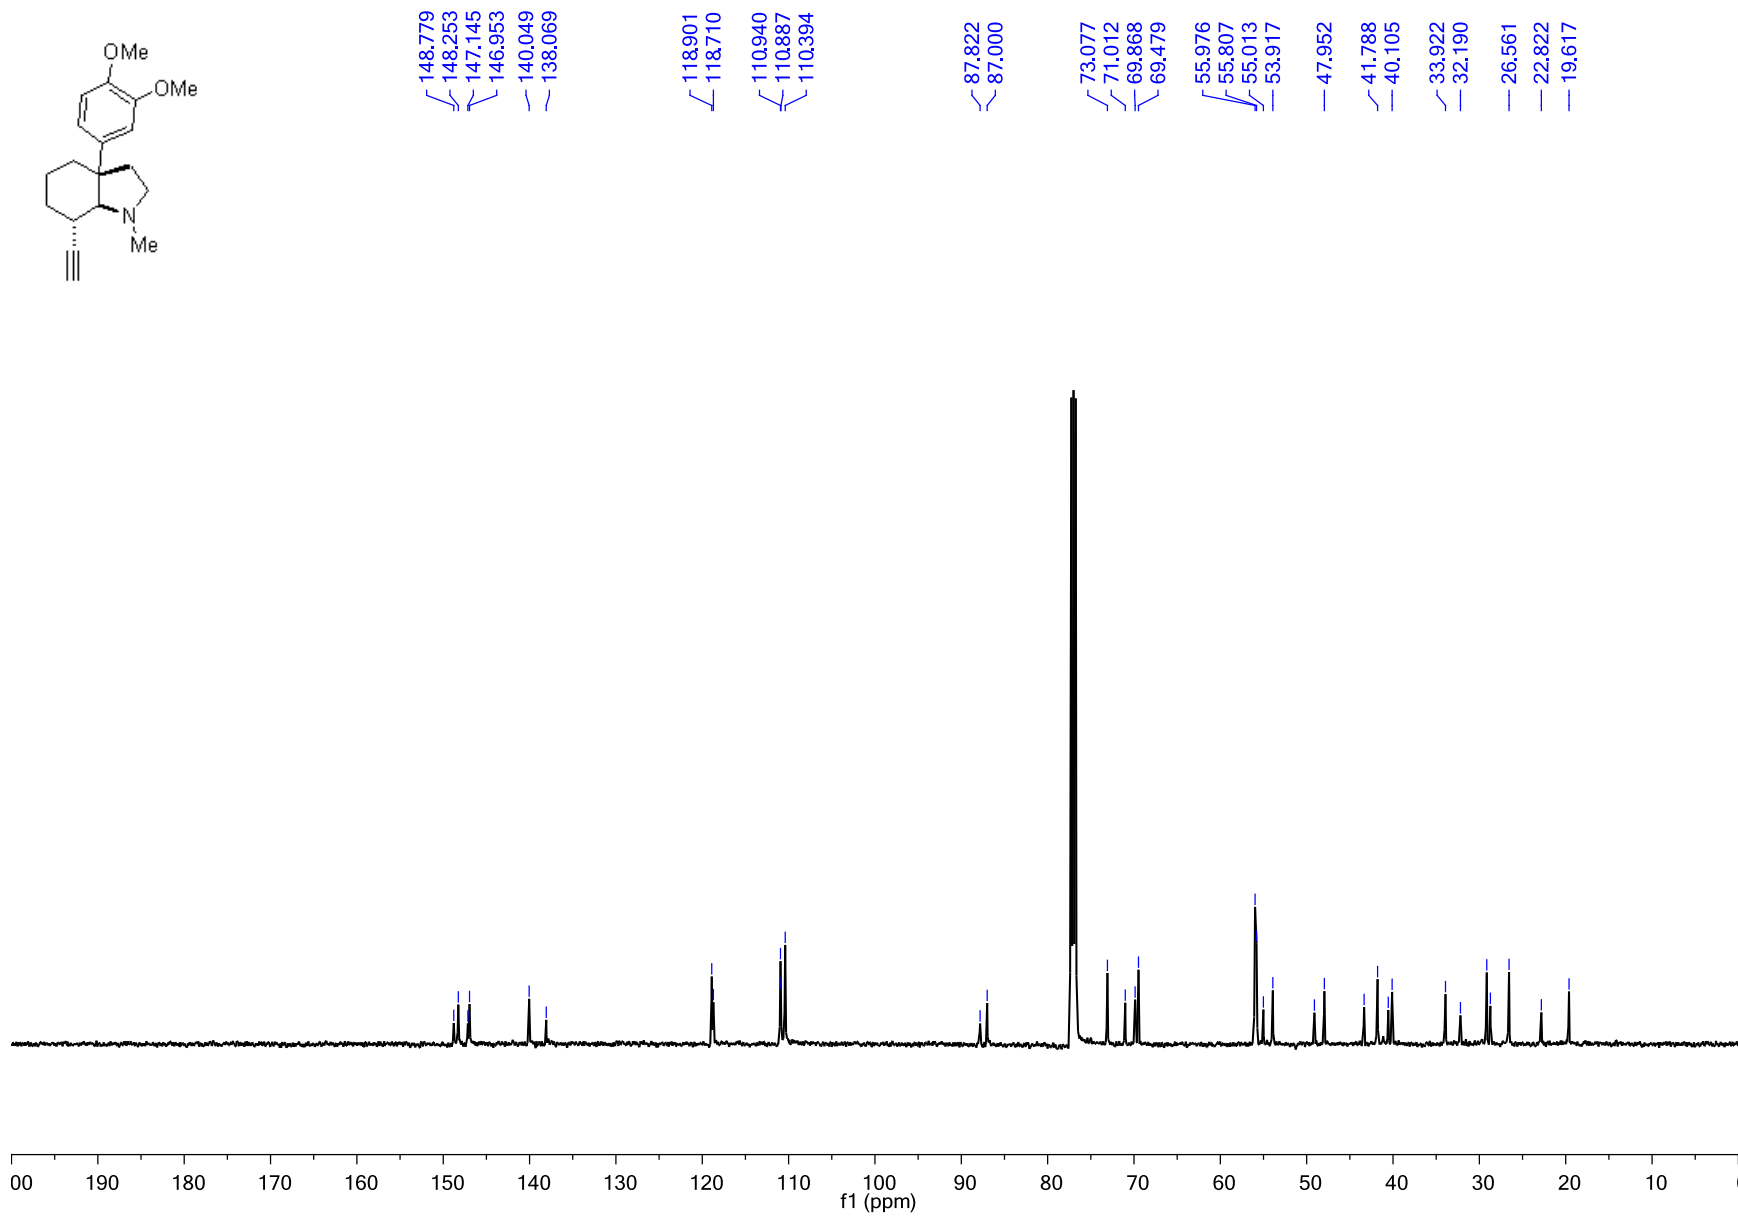

## XI. X-Ray Data

### 1. Crystal Structure Report for rds667 (3pa-major)

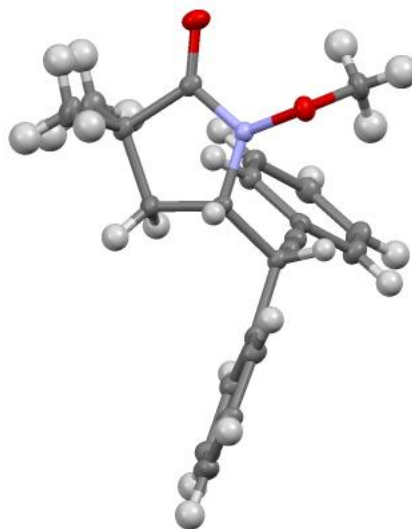

A colorless block-like specimen of  $C_{22}H_{23}NO_2$ , approximate dimensions 0.092 mm x 0.251 mm x 0.387 mm, was used for the X-ray crystallographic analysis. The X-ray intensity data were measured.

The total exposure time was 9.52 hours. The frames were integrated with the Bruker SAINT software package using a narrow-frame algorithm. The integration of the data using a triclinic unit cell yielded a total of 27055 reflections to a maximum  $\theta$  angle of  $29.75^\circ$  (0.72 Å resolution), of which 5179 were independent (average redundancy 5.224, completeness = 99.6%,  $R_{int} = 3.37\%$ ,  $R_{sig} = 3.05\%$ ) and 3980 (76.85%) were greater than  $2\sigma(F^2)$ . The final cell constants of  $a = 9.3352(7)$  Å,  $b = 10.2282(9)$  Å,  $c = 11.6109(9)$  Å,  $\alpha = 70.977(2)^\circ$ ,  $\beta = 69.277(3)^\circ$ ,  $\gamma = 63.872(2)^\circ$ , volume =  $911.65(13)$  Å<sup>3</sup>, are based upon the refinement of the XYZ-centroids of 7324 reflections above  $20\sigma(I)$  with  $4.528^\circ < 2\theta < 59.04^\circ$ . Data were corrected for absorption effects using the Multi-Scan method (SADABS). The ratio of minimum to maximum apparent transmission was 0.966. The calculated minimum and maximum transmission coefficients (based on crystal size) are 0.9710 and 0.9930. The final anisotropic full-matrix least-squares refinement on  $F^2$  with 229 variables converged at  $R1 = 4.22\%$ , for the observed data and  $wR2 = 10.38\%$  for all data. The goodness-of-fit was 1.037. The largest peak in the final difference electron density synthesis was  $0.350 e/\text{Å}^3$  and the largest hole was  $-0.205 e/\text{Å}^3$  with an RMS deviation of  $0.042 e/\text{Å}^3$ . On the basis of the final model, the calculated density was  $1.215 g/cm^3$  and  $F(000)$ , 356  $e^-$ .

#### Sample and crystal data for rds667.

|                      |                          |                            |
|----------------------|--------------------------|----------------------------|
| Identification code  | rds667                   |                            |
| Chemical formula     | $C_{22}H_{23}NO_2$       |                            |
| Formula weight       | 333.41 g/mol             |                            |
| Temperature          | 121(2) K                 |                            |
| Wavelength           | 0.71073 Å                |                            |
| Crystal size         | 0.092 x 0.251 x 0.387 mm |                            |
| Crystal habit        | colorless block          |                            |
| Crystal system       | triclinic                |                            |
| Space group          | P -1                     |                            |
| Unit cell dimensions | $a = 9.3352(7)$ Å        | $\alpha = 70.977(2)^\circ$ |
|                      | $b = 10.2282(9)$ Å       | $\beta = 69.277(3)^\circ$  |
|                      | $c = 11.6109(9)$ Å       | $\gamma = 63.872(2)^\circ$ |

|                               |                           |
|-------------------------------|---------------------------|
| <b>Volume</b>                 | 911.65(13) Å <sup>3</sup> |
| <b>Z</b>                      | 2                         |
| <b>Density (calculated)</b>   | 1.215 g/cm <sup>3</sup>   |
| <b>Absorption coefficient</b> | 0.077 mm <sup>-1</sup>    |
| <b>F(000)</b>                 | 356                       |

**Data collection and structure refinement for rds667.**

|                                            |                                                                                                                                                               |                           |
|--------------------------------------------|---------------------------------------------------------------------------------------------------------------------------------------------------------------|---------------------------|
| <b>Theta range for data collection</b>     | 1.92 to 29.75°                                                                                                                                                |                           |
| <b>Index ranges</b>                        | -13<=h<=12, -14<=k<=14, -16<=l<=16                                                                                                                            |                           |
| <b>Reflections collected</b>               | 27055                                                                                                                                                         |                           |
| <b>Independent reflections</b>             | 5179 [R(int) = 0.0337]                                                                                                                                        |                           |
| <b>Coverage of independent reflections</b> | 99.6%                                                                                                                                                         |                           |
| <b>Absorption correction</b>               | Multi-Scan                                                                                                                                                    |                           |
| <b>Max. and min. transmission</b>          | 0.9930 and 0.9710                                                                                                                                             |                           |
| <b>Refinement method</b>                   | Full-matrix least-squares on F <sup>2</sup>                                                                                                                   |                           |
| <b>Refinement program</b>                  | SHELXL-2014/7 (Sheldrick, 2014)                                                                                                                               |                           |
| <b>Function minimized</b>                  | Σ w(F <sub>o</sub> <sup>2</sup> - F <sub>c</sub> <sup>2</sup> ) <sup>2</sup>                                                                                  |                           |
| <b>Data / restraints / parameters</b>      | 5179 / 0 / 229                                                                                                                                                |                           |
| <b>Goodness-of-fit on F<sup>2</sup></b>    | 1.037                                                                                                                                                         |                           |
| <b>Final R indices</b>                     | 3980 data; I>2σ(I)                                                                                                                                            | R1 = 0.0422, wR2 = 0.0944 |
|                                            | all data                                                                                                                                                      | R1 = 0.0627, wR2 = 0.1038 |
| <b>Weighting scheme</b>                    | w=1/[σ <sup>2</sup> (F <sub>o</sub> <sup>2</sup> )+(0.0421P) <sup>2</sup> +0.2729P]<br>where P=(F <sub>o</sub> <sup>2</sup> +2F <sub>c</sub> <sup>2</sup> )/3 |                           |
| <b>Largest diff. peak and hole</b>         | 0.350 and -0.205 eÅ <sup>-3</sup>                                                                                                                             |                           |
| <b>R.M.S. deviation from mean</b>          | 0.042 eÅ <sup>-3</sup>                                                                                                                                        |                           |

**Atomic coordinates and equivalent isotropic atomic displacement parameters (Å<sup>2</sup>) for rds667.**

U(eq) is defined as one third of the trace of the orthogonalized U<sub>ij</sub> tensor.

|     | <b>x/a</b>  | <b>y/b</b>  | <b>z/c</b>  | <b>U(eq)</b> |
|-----|-------------|-------------|-------------|--------------|
| O1  | 0.98048(10) | 0.17571(9)  | 0.63364(8)  | 0.02538(19)  |
| C1  | 0.13770(13) | 0.42874(12) | 0.64168(10) | 0.0175(2)    |
| C2  | 0.05056(14) | 0.39440(14) | 0.78158(11) | 0.0237(2)    |
| O2  | 0.19244(10) | 0.31650(9)  | 0.46822(7)  | 0.02135(18)  |
| N1  | 0.13890(11) | 0.31034(10) | 0.59775(8)  | 0.01752(19)  |
| C4  | 0.01951(13) | 0.25426(12) | 0.66679(10) | 0.0178(2)    |
| C9  | 0.41649(13) | 0.28301(12) | 0.67892(11) | 0.0190(2)    |
| C5  | 0.33354(15) | 0.18515(14) | 0.44035(12) | 0.0281(3)    |
| C6  | 0.76539(14) | 0.40751(14) | 0.79407(12) | 0.0265(3)    |
| C7  | 0.95659(16) | 0.17517(14) | 0.90093(12) | 0.0281(3)    |
| C8  | 0.31343(13) | 0.42558(12) | 0.61590(10) | 0.0165(2)    |
| C22 | 0.23052(14) | 0.70194(13) | 0.58258(11) | 0.0222(2)    |
| C10 | 0.49116(14) | 0.16386(12) | 0.73328(11) | 0.0197(2)    |

|     | x/a         | y/b         | z/c         | U(eq)     |
|-----|-------------|-------------|-------------|-----------|
| C11 | 0.57484(13) | 0.01920(12) | 0.80062(10) | 0.0176(2) |
| C13 | 0.56142(14) | 0.79443(13) | 0.95075(11) | 0.0226(2) |
| C12 | 0.48371(14) | 0.93378(13) | 0.88518(11) | 0.0206(2) |
| C3  | 0.94621(13) | 0.30762(12) | 0.79041(10) | 0.0188(2) |
| C21 | 0.20885(15) | 0.82850(13) | 0.61664(12) | 0.0263(3) |
| C17 | 0.30087(13) | 0.56119(12) | 0.65251(10) | 0.0172(2) |
| C16 | 0.74557(14) | 0.96193(13) | 0.78326(11) | 0.0224(2) |
| C20 | 0.26002(15) | 0.81632(14) | 0.71915(13) | 0.0278(3) |
| C18 | 0.35146(14) | 0.54995(13) | 0.75562(11) | 0.0211(2) |
| C14 | 0.73095(15) | 0.73813(13) | 0.93319(11) | 0.0234(2) |
| C15 | 0.82237(14) | 0.82186(14) | 0.84946(12) | 0.0257(3) |
| C19 | 0.33205(15) | 0.67735(15) | 0.78803(12) | 0.0269(3) |

**Bond lengths (Å) for rds667.**

|         |            |         |            |
|---------|------------|---------|------------|
| O1-C4   | 1.2186(14) | C1-N1   | 1.4539(14) |
| C1-C2   | 1.5389(16) | C1-C8   | 1.5472(14) |
| C1-H1   | 1.0        | C2-C3   | 1.5424(16) |
| C2-H2A  | 0.99       | C2-H2B  | 0.99       |
| O2-N1   | 1.3963(12) | O2-C5   | 1.4380(14) |
| N1-C4   | 1.3582(14) | C4-C3   | 1.5208(16) |
| C9-C10  | 1.1963(16) | C9-C8   | 1.4678(15) |
| C5-H5A  | 0.98       | C5-H5B  | 0.98       |
| C5-H5C  | 0.98       | C6-C3   | 1.5341(15) |
| C6-H6A  | 0.98       | C6-H6B  | 0.98       |
| C6-H6C  | 0.98       | C7-C3   | 1.5266(16) |
| C7-H7A  | 0.98       | C7-H7B  | 0.98       |
| C7-H7C  | 0.98       | C8-C17  | 1.5245(15) |
| C8-H8   | 1.0        | C22-C21 | 1.3854(17) |
| C22-C17 | 1.3949(16) | C22-H22 | 0.95       |
| C10-C11 | 1.4391(15) | C11-C16 | 1.3969(15) |
| C11-C12 | 1.3983(16) | C13-C12 | 1.3821(16) |
| C13-C14 | 1.3868(17) | C13-H13 | 0.95       |
| C12-H12 | 0.95       | C21-C20 | 1.3834(18) |
| C21-H21 | 0.95       | C17-C18 | 1.3900(16) |
| C16-C15 | 1.3874(17) | C16-H16 | 0.95       |
| C20-C19 | 1.3820(18) | C20-H20 | 0.95       |
| C18-C19 | 1.3913(17) | C18-H18 | 0.95       |
| C14-C15 | 1.3859(17) | C14-H14 | 0.95       |
| C15-H15 | 0.95       | C19-H19 | 0.95       |

**Bond angles (°) for rds667.**

|          |           |          |           |
|----------|-----------|----------|-----------|
| N1-C1-C2 | 100.55(8) | N1-C1-C8 | 111.89(9) |
|----------|-----------|----------|-----------|



|             |            |             |            |
|-------------|------------|-------------|------------|
| C2-C1-C8    | 114.98(9)  | N1-C1-H1    | 109.7      |
| C2-C1-H1    | 109.7      | C8-C1-H1    | 109.7      |
| C1-C2-C3    | 106.35(9)  | C1-C2-H2A   | 110.5      |
| C3-C2-H2A   | 110.5      | C1-C2-H2B   | 110.5      |
| C3-C2-H2B   | 110.5      | H2A-C2-H2B  | 108.6      |
| N1-O2-C5    | 110.25(8)  | C4-N1-O2    | 119.13(9)  |
| C4-N1-C1    | 115.44(9)  | O2-N1-C1    | 116.86(8)  |
| O1-C4-N1    | 125.25(10) | O1-C4-C3    | 127.31(10) |
| N1-C4-C3    | 107.44(9)  | C10-C9-C8   | 175.41(11) |
| O2-C5-H5A   | 109.5      | O2-C5-H5B   | 109.5      |
| H5A-C5-H5B  | 109.5      | O2-C5-H5C   | 109.5      |
| H5A-C5-H5C  | 109.5      | H5B-C5-H5C  | 109.5      |
| C3-C6-H6A   | 109.5      | C3-C6-H6B   | 109.5      |
| H6A-C6-H6B  | 109.5      | C3-C6-H6C   | 109.5      |
| H6A-C6-H6C  | 109.5      | H6B-C6-H6C  | 109.5      |
| C3-C7-H7A   | 109.5      | C3-C7-H7B   | 109.5      |
| H7A-C7-H7B  | 109.5      | C3-C7-H7C   | 109.5      |
| H7A-C7-H7C  | 109.5      | H7B-C7-H7C  | 109.5      |
| C9-C8-C17   | 114.23(9)  | C9-C8-C1    | 110.53(9)  |
| C17-C8-C1   | 108.76(8)  | C9-C8-H8    | 107.7      |
| C17-C8-H8   | 107.7      | C1-C8-H8    | 107.7      |
| C21-C22-C17 | 120.53(11) | C21-C22-H22 | 119.7      |
| C17-C22-H22 | 119.7      | C9-C10-C11  | 177.62(12) |
| C16-C11-C12 | 119.15(10) | C16-C11-C10 | 121.39(10) |
| C12-C11-C10 | 119.46(10) | C12-C13-C14 | 120.13(11) |
| C12-C13-H13 | 119.9      | C14-C13-H13 | 119.9      |
| C13-C12-C11 | 120.48(10) | C13-C12-H12 | 119.8      |
| C11-C12-H12 | 119.8      | C4-C3-C7    | 110.18(9)  |
| C4-C3-C6    | 106.90(9)  | C7-C3-C6    | 109.95(10) |
| C4-C3-C2    | 103.66(9)  | C7-C3-C2    | 113.20(10) |
| C6-C3-C2    | 112.60(10) | C20-C21-C22 | 120.20(11) |
| C20-C21-H21 | 119.9      | C22-C21-H21 | 119.9      |
| C18-C17-C22 | 118.89(10) | C18-C17-C8  | 122.39(10) |
| C22-C17-C8  | 118.68(10) | C15-C16-C11 | 119.90(11) |
| C15-C16-H16 | 120.0      | C11-C16-H16 | 120.0      |
| C19-C20-C21 | 119.75(11) | C19-C20-H20 | 120.1      |
| C21-C20-H20 | 120.1      | C17-C18-C19 | 120.30(11) |
| C17-C18-H18 | 119.8      | C19-C18-H18 | 119.8      |
| C15-C14-C13 | 119.82(11) | C15-C14-H14 | 120.1      |
| C13-C14-H14 | 120.1      | C14-C15-C16 | 120.51(11) |
| C14-C15-H15 | 119.7      | C16-C15-H15 | 119.7      |
| C20-C19-C18 | 120.31(11) | C20-C19-H19 | 119.8      |
| C18-C19-H19 | 119.8      |             |            |

**Torsion angles (°) for rds667.**

|                 |             |                 |             |
|-----------------|-------------|-----------------|-------------|
| N1-C1-C2-C3     | -24.43(11)  | C8-C1-C2-C3     | -144.77(9)  |
| C5-O2-N1-C4     | -93.24(11)  | C5-O2-N1-C1     | 120.30(10)  |
| C2-C1-N1-C4     | 24.72(12)   | C8-C1-N1-C4     | 147.24(9)   |
| C2-C1-N1-O2     | 172.42(9)   | C8-C1-N1-O2     | -65.06(12)  |
| O2-N1-C4-O1     | 18.78(16)   | C1-N1-C4-O1     | 165.70(10)  |
| O2-N1-C4-C3     | -161.21(8)  | C1-N1-C4-C3     | -14.29(12)  |
| N1-C1-C8-C9     | -59.35(12)  | C2-C1-C8-C9     | 54.52(12)   |
| N1-C1-C8-C17    | 174.49(9)   | C2-C1-C8-C17    | -71.64(11)  |
| C14-C13-C12-C11 | 0.05(17)    | C16-C11-C12-C13 | -0.03(16)   |
| C10-C11-C12-C13 | 179.89(10)  | O1-C4-C3-C7     | 55.52(15)   |
| N1-C4-C3-C7     | -124.49(10) | O1-C4-C3-C6     | -63.92(14)  |
| N1-C4-C3-C6     | 116.08(10)  | O1-C4-C3-C2     | 176.93(11)  |
| N1-C4-C3-C2     | -3.07(11)   | C1-C2-C3-C4     | 17.56(11)   |
| C1-C2-C3-C7     | 136.92(10)  | C1-C2-C3-C6     | -97.60(11)  |
| C17-C22-C21-C20 | 1.33(18)    | C21-C22-C17-C18 | -1.10(17)   |
| C21-C22-C17-C8  | 176.60(10)  | C9-C8-C17-C18   | -13.45(14)  |
| C1-C8-C17-C18   | 110.54(11)  | C9-C8-C17-C22   | 168.93(10)  |
| C1-C8-C17-C22   | -67.08(12)  | C12-C11-C16-C15 | 0.09(17)    |
| C10-C11-C16-C15 | -179.83(11) | C22-C21-C20-C19 | -0.38(18)   |
| C22-C17-C18-C19 | -0.05(16)   | C8-C17-C18-C19  | -177.66(10) |
| C12-C13-C14-C15 | -0.14(18)   | C13-C14-C15-C16 | 0.20(18)    |
| C11-C16-C15-C14 | -0.18(18)   | C21-C20-C19-C18 | -0.78(18)   |
| C17-C18-C19-C20 | 0.99(18)    |                 |             |

**Anisotropic atomic displacement parameters (Å<sup>2</sup>) for rds667.**

The anisotropic atomic displacement factor exponent takes the form:  $-2\pi^2 [ h^2 a^{*2} U_{11} + \dots + 2 h k a^* b^* U_{12} ]$

|     | U <sub>11</sub> | U <sub>22</sub> | U <sub>33</sub> | U <sub>23</sub> | U <sub>13</sub> | U <sub>12</sub> |
|-----|-----------------|-----------------|-----------------|-----------------|-----------------|-----------------|
| O1  | 0.0285(4)       | 0.0251(4)       | 0.0292(5)       | -0.0035(3)      | -0.0080(4)      | -0.0163(4)      |
| C1  | 0.0147(5)       | 0.0162(5)       | 0.0223(5)       | -0.0045(4)      | -0.0042(4)      | -0.0062(4)      |
| C2  | 0.0197(5)       | 0.0310(6)       | 0.0234(6)       | -0.0122(5)      | 0.0027(4)       | -0.0134(5)      |
| O2  | 0.0238(4)       | 0.0242(4)       | 0.0143(4)       | -0.0032(3)      | -0.0028(3)      | -0.0094(3)      |
| N1  | 0.0180(4)       | 0.0203(5)       | 0.0153(4)       | -0.0042(3)      | -0.0015(3)      | -0.0095(4)      |
| C4  | 0.0153(5)       | 0.0152(5)       | 0.0210(5)       | 0.0002(4)       | -0.0068(4)      | -0.0050(4)      |
| C9  | 0.0162(5)       | 0.0204(5)       | 0.0207(5)       | -0.0050(4)      | -0.0026(4)      | -0.0079(4)      |
| C5  | 0.0266(6)       | 0.0280(6)       | 0.0264(6)       | -0.0118(5)      | 0.0029(5)       | -0.0099(5)      |
| C6  | 0.0160(5)       | 0.0242(6)       | 0.0298(6)       | -0.0006(5)      | -0.0020(5)      | -0.0055(5)      |
| C7  | 0.0287(6)       | 0.0262(6)       | 0.0215(6)       | 0.0019(5)       | -0.0063(5)      | -0.0079(5)      |
| C8  | 0.0152(5)       | 0.0168(5)       | 0.0175(5)       | -0.0016(4)      | -0.0033(4)      | -0.0076(4)      |
| C22 | 0.0236(5)       | 0.0212(6)       | 0.0234(6)       | 0.0002(4)       | -0.0070(4)      | -0.0121(5)      |
| C10 | 0.0190(5)       | 0.0198(5)       | 0.0213(5)       | -0.0059(4)      | -0.0040(4)      | -0.0075(4)      |
| C11 | 0.0197(5)       | 0.0164(5)       | 0.0176(5)       | -0.0057(4)      | -0.0054(4)      | -0.0053(4)      |

|     | $U_{11}$  | $U_{22}$  | $U_{33}$  | $U_{23}$   | $U_{13}$   | $U_{12}$   |
|-----|-----------|-----------|-----------|------------|------------|------------|
| C13 | 0.0254(6) | 0.0218(6) | 0.0207(6) | -0.0027(4) | -0.0036(4) | -0.0117(5) |
| C12 | 0.0173(5) | 0.0226(6) | 0.0221(5) | -0.0061(4) | -0.0042(4) | -0.0070(4) |
| C3  | 0.0156(5) | 0.0186(5) | 0.0198(5) | -0.0018(4) | -0.0028(4) | -0.0069(4) |
| C21 | 0.0251(6) | 0.0189(6) | 0.0341(7) | -0.0015(5) | -0.0058(5) | -0.0113(5) |
| C17 | 0.0136(5) | 0.0185(5) | 0.0200(5) | -0.0032(4) | -0.0017(4) | -0.0087(4) |
| C16 | 0.0194(5) | 0.0216(6) | 0.0257(6) | -0.0021(4) | -0.0043(4) | -0.0099(4) |
| C20 | 0.0250(6) | 0.0249(6) | 0.0379(7) | -0.0129(5) | -0.0013(5) | -0.0133(5) |
| C18 | 0.0182(5) | 0.0232(6) | 0.0221(6) | -0.0026(4) | -0.0049(4) | -0.0093(4) |
| C14 | 0.0258(6) | 0.0183(5) | 0.0231(6) | -0.0031(4) | -0.0081(5) | -0.0046(5) |
| C15 | 0.0172(5) | 0.0245(6) | 0.0314(6) | -0.0036(5) | -0.0070(5) | -0.0049(5) |
| C19 | 0.0248(6) | 0.0345(7) | 0.0280(6) | -0.0114(5) | -0.0051(5) | -0.0142(5) |

**Hydrogen atomic coordinates and isotropic atomic displacement parameters ( $\text{\AA}^2$ ) for rds667.**

|     | $x/a$   | $y/b$   | $z/c$  | $U(\text{eq})$ |
|-----|---------|---------|--------|----------------|
| H1  | 0.0681  | 0.5273  | 0.5999 | 0.021          |
| H2A | -0.0207 | 0.4877  | 0.8128 | 0.028          |
| H2B | 0.1324  | 0.3338  | 0.8324 | 0.028          |
| H5A | 0.3725  | 0.1925  | 0.3491 | 0.042          |
| H5B | 0.3029  | 0.0975  | 0.4795 | 0.042          |
| H5C | 0.4214  | 0.1759  | 0.4734 | 0.042          |
| H6A | -0.2921 | 0.3505  | 0.7881 | 0.04           |
| H6B | -0.2403 | 0.4926  | 0.7232 | 0.04           |
| H6C | -0.2870 | 0.4432  | 0.8732 | 0.04           |
| H7A | -0.1041 | 0.1196  | 0.8975 | 0.042          |
| H7B | -0.0917 | 0.2109  | 0.9800 | 0.042          |
| H7C | 0.0722  | 0.1100  | 0.8963 | 0.042          |
| H8  | 0.3632  | 0.4346  | 0.5233 | 0.02           |
| H22 | 0.1972  | 0.7111  | 0.5110 | 0.027          |
| H13 | 0.4986  | -0.2629 | 1.0080 | 0.027          |
| H12 | 0.3675  | -0.0282 | 0.8976 | 0.025          |
| H21 | 0.1587  | 0.9239  | 0.5695 | 0.032          |
| H16 | 0.8090  | 0.0188  | 0.7262 | 0.027          |
| H20 | 0.2457  | 0.9032  | 0.7421 | 0.033          |
| H18 | 0.3995  | 0.4548  | 0.8042 | 0.025          |
| H14 | 0.7843  | -0.3576 | 0.9784 | 0.028          |
| H15 | 0.9385  | -0.2170 | 0.8373 | 0.031          |
| H19 | 0.3685  | 0.6688  | 0.8578 | 0.032          |

## 2. Crystal Structure Report for rds624 (17a-major)

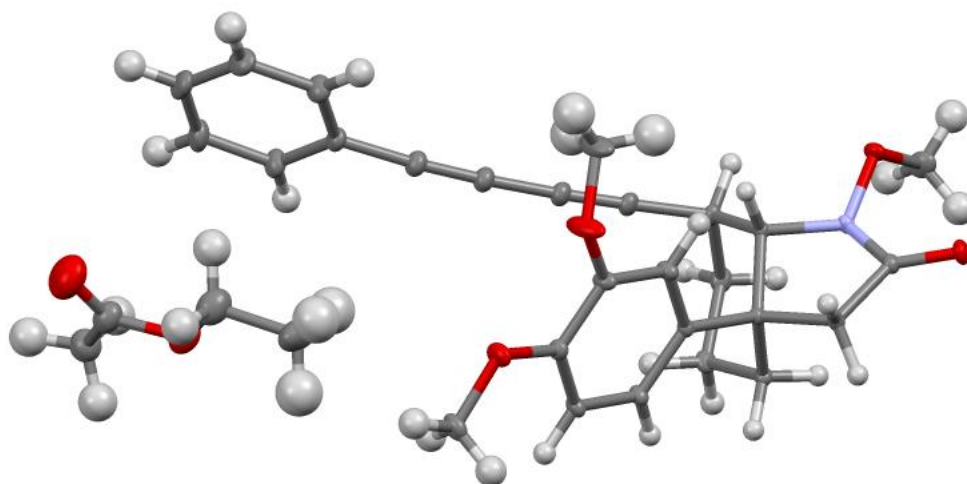

A colorless block-like specimen of  $C_{31}H_{35}NO_6$ , approximate dimensions 0.220 mm x 0.392 mm x 0.538 mm, was used for the X-ray crystallographic analysis. The X-ray intensity data were measured.

The total exposure time was 6.26 hours. The frames were integrated with the Bruker SAINT software package using a narrow-frame algorithm. The integration of the data using a monoclinic unit cell yielded a total of 94581 reflections to a maximum  $\theta$  angle of  $35.12^\circ$  ( $0.62 \text{ \AA}$  resolution), of which 12175 were independent (average redundancy 7.768, completeness = 99.7%,  $R_{\text{int}} = 3.57\%$ ,  $R_{\text{sig}} = 2.44\%$ ) and 9610 (78.93%) were greater than  $2\sigma(F^2)$ . The final cell constants of  $a = 14.8729(4) \text{ \AA}$ ,  $b = 11.2262(3) \text{ \AA}$ ,  $c = 16.4910(5) \text{ \AA}$ ,  $\beta = 92.9640(13)^\circ$ , volume =  $2749.76(13) \text{ \AA}^3$ , are based upon the refinement of the XYZ-centroids of 275 reflections above  $20 \sigma(I)$  with  $5.230^\circ < 2\theta < 60.61^\circ$ . Data were corrected for absorption effects using the Multi-Scan method (SADABS). The ratio of minimum to maximum apparent transmission was 0.930. The calculated minimum and maximum transmission coefficients (based on crystal size) are 0.9550 and 0.9810.

The final anisotropic full-matrix least-squares refinement on  $F^2$  with 348 variables converged at  $R1 = 5.19\%$ , for the observed data and  $wR2 = 15.81\%$  for all data. The goodness-of-fit was 1.042. The largest peak in the final difference electron density synthesis was  $0.868 \text{ e}^-/\text{\AA}^3$  and the largest hole was  $-0.891 \text{ e}^-/\text{\AA}^3$  with an RMS deviation of  $0.073 \text{ e}^-/\text{\AA}^3$ . On the basis of the final model, the calculated density was  $1.250 \text{ g/cm}^3$  and  $F(000)$ , 1104  $e^-$ .

### Sample and crystal data for rds624.

|                      |                                                                                              |                                                                           |
|----------------------|----------------------------------------------------------------------------------------------|---------------------------------------------------------------------------|
| Identification code  | rds624                                                                                       |                                                                           |
| Chemical formula     | $C_{31}H_{35}NO_6$                                                                           |                                                                           |
| Formula weight       | 517.60 g/mol                                                                                 |                                                                           |
| Temperature          | 100(2) K                                                                                     |                                                                           |
| Wavelength           | 0.71073 $\text{\AA}$                                                                         |                                                                           |
| Crystal size         | 0.220 x 0.392 x 0.538 mm                                                                     |                                                                           |
| Crystal habit        | colorless block                                                                              |                                                                           |
| Crystal system       | monoclinic                                                                                   |                                                                           |
| Space group          | $P 1 21/c 1$                                                                                 |                                                                           |
| Unit cell dimensions | $a = 14.8729(4) \text{ \AA}$<br>$b = 11.2262(3) \text{ \AA}$<br>$c = 16.4910(5) \text{ \AA}$ | $\alpha = 90^\circ$<br>$\beta = 92.9640(13)^\circ$<br>$\gamma = 90^\circ$ |
| Volume               | $2749.76(13) \text{ \AA}^3$                                                                  |                                                                           |
| Z                    | 4                                                                                            |                                                                           |

|                        |                         |
|------------------------|-------------------------|
| Density (calculated)   | 1.250 g/cm <sup>3</sup> |
| Absorption coefficient | 0.086 mm <sup>-1</sup>  |
| F(000)                 | 1104                    |

**Data collection and structure refinement for rds624.**

|                                     |                                                                                                                                                               |                           |
|-------------------------------------|---------------------------------------------------------------------------------------------------------------------------------------------------------------|---------------------------|
| Theta range for data collection     | 2.20 to 35.12°                                                                                                                                                |                           |
| Index ranges                        | -23<=h<=24, -18<=k<=18, -26<=l<=18                                                                                                                            |                           |
| Reflections collected               | 94581                                                                                                                                                         |                           |
| Independent reflections             | 12175 [R(int) = 0.0357]                                                                                                                                       |                           |
| Coverage of independent reflections | 99.7%                                                                                                                                                         |                           |
| Absorption correction               | Multi-Scan                                                                                                                                                    |                           |
| Max. and min. transmission          | 0.9810 and 0.9550                                                                                                                                             |                           |
| Refinement method                   | Full-matrix least-squares on F <sup>2</sup>                                                                                                                   |                           |
| Refinement program                  | SHELXL-2014/7 (Sheldrick, 2014)                                                                                                                               |                           |
| Function minimized                  | Σ w(F <sub>o</sub> <sup>2</sup> - F <sub>c</sub> <sup>2</sup> ) <sup>2</sup>                                                                                  |                           |
| Data / restraints / parameters      | 12175 / 0 / 348                                                                                                                                               |                           |
| Goodness-of-fit on F <sup>2</sup>   | 1.042                                                                                                                                                         |                           |
| Δ/σ <sub>max</sub>                  | 0.001                                                                                                                                                         |                           |
| Final R indices                     | 9610 data; I>2σ(I)                                                                                                                                            | R1 = 0.0519, wR2 = 0.1448 |
|                                     | all data                                                                                                                                                      | R1 = 0.0688, wR2 = 0.1581 |
| Weighting scheme                    | w=1/[σ <sup>2</sup> (F <sub>o</sub> <sup>2</sup> )+(0.0820P) <sup>2</sup> +1.2208P]<br>where P=(F <sub>o</sub> <sup>2</sup> +2F <sub>c</sub> <sup>2</sup> )/3 |                           |
| Largest diff. peak and hole         | 0.868 and -0.891 eÅ <sup>-3</sup>                                                                                                                             |                           |
| R.M.S. deviation from mean          | 0.073 eÅ <sup>-3</sup>                                                                                                                                        |                           |

**Atomic coordinates and equivalent isotropic atomic displacement parameters (Å<sup>2</sup>) for rds624.**

U(eq) is defined as one third of the trace of the orthogonalized U<sub>ij</sub> tensor.

|    | x/a        | y/b         | z/c        | U(eq)       |
|----|------------|-------------|------------|-------------|
| O1 | 0.63629(5) | 0.94950(6)  | 0.48374(4) | 0.01555(13) |
| O2 | 0.58490(5) | 0.15223(7)  | 0.56066(4) | 0.01534(13) |
| O3 | 0.22184(5) | 0.17390(8)  | 0.12783(5) | 0.01821(14) |
| O4 | 0.21076(5) | 0.09559(11) | 0.27560(5) | 0.0308(2)   |
| N1 | 0.58442(5) | 0.14179(7)  | 0.47633(5) | 0.01112(13) |
| C1 | 0.51613(6) | 0.20878(7)  | 0.42852(5) | 0.00997(14) |
| C2 | 0.53566(6) | 0.16348(7)  | 0.34179(5) | 0.00934(13) |
| C3 | 0.61989(6) | 0.22692(8)  | 0.31234(6) | 0.01155(14) |
| C4 | 0.61751(6) | 0.36227(8)  | 0.32004(6) | 0.01466(16) |
| C5 | 0.60958(6) | 0.39706(8)  | 0.40878(6) | 0.01515(16) |
| C6 | 0.52405(6) | 0.34367(8)  | 0.44254(6) | 0.01246(15) |
| C7 | 0.56191(6) | 0.03179(8)  | 0.35888(5) | 0.01206(14) |
| C8 | 0.59976(6) | 0.03088(8)  | 0.44547(5) | 0.01132(14) |
| C9 | 0.67374(7) | 0.18205(12) | 0.59154(7) | 0.0227(2)   |

|     | <b>x/a</b>  | <b>y/b</b>  | <b>z/c</b>  | <b>U(eq)</b> |
|-----|-------------|-------------|-------------|--------------|
| C10 | 0.44249(6)  | 0.40179(8)  | 0.40771(6)  | 0.01489(16)  |
| C11 | 0.37432(7)  | 0.44776(9)  | 0.38016(6)  | 0.01629(17)  |
| C12 | 0.29596(7)  | 0.50131(9)  | 0.35179(7)  | 0.01743(17)  |
| C13 | 0.22705(7)  | 0.55240(10) | 0.33031(7)  | 0.01823(18)  |
| C14 | 0.14626(6)  | 0.61805(9)  | 0.31118(6)  | 0.01617(17)  |
| C15 | 0.06250(7)  | 0.56997(11) | 0.32845(7)  | 0.02137(19)  |
| C16 | 0.98466(7)  | 0.63644(12) | 0.31396(8)  | 0.0256(2)    |
| C17 | 0.98943(8)  | 0.75073(12) | 0.28272(8)  | 0.0257(2)    |
| C18 | 0.07231(8)  | 0.79901(11) | 0.26486(8)  | 0.0248(2)    |
| C19 | 0.15046(7)  | 0.73272(10) | 0.27836(7)  | 0.02070(19)  |
| C20 | 0.45325(6)  | 0.17291(7)  | 0.28312(5)  | 0.00970(13)  |
| C21 | 0.45791(6)  | 0.21430(8)  | 0.20430(5)  | 0.01223(15)  |
| C22 | 0.38205(6)  | 0.21668(8)  | 0.15047(6)  | 0.01307(15)  |
| C23 | 0.29964(6)  | 0.17708(8)  | 0.17523(6)  | 0.01252(15)  |
| C24 | 0.29367(6)  | 0.13581(9)  | 0.25521(6)  | 0.01478(16)  |
| C25 | 0.36936(6)  | 0.13325(9)  | 0.30770(5)  | 0.01337(15)  |
| C26 | 0.22784(7)  | 0.20642(10) | 0.04456(6)  | 0.01979(19)  |
| C27 | 0.18786(8)  | 0.11500(17) | 0.35675(8)  | 0.0359(3)    |
| O1S | 0.99208(8)  | 0.81083(13) | 0.05570(9)  | 0.0501(3)    |
| O2S | 0.12522(6)  | 0.71439(9)  | 0.06310(7)  | 0.0313(2)    |
| C1S | 0.07167(9)  | 0.81341(12) | 0.05117(9)  | 0.0280(2)    |
| C2S | 0.12678(9)  | 0.92287(13) | 0.04103(9)  | 0.0311(3)    |
| C3S | 0.07744(10) | 0.60424(13) | 0.07964(11) | 0.0368(3)    |
| C4S | 0.14528(13) | 0.50579(16) | 0.08933(12) | 0.0462(4)    |

**Bond lengths (Å) for rds624.**

|        |            |        |            |
|--------|------------|--------|------------|
| O1-C8  | 1.2217(11) | O2-N1  | 1.3952(10) |
| O2-C9  | 1.4309(13) | O3-C23 | 1.3631(11) |
| O3-C26 | 1.4281(13) | O4-C24 | 1.3713(12) |
| O4-C27 | 1.4147(15) | N1-C8  | 1.3686(12) |
| N1-C1  | 1.4615(11) | C1-C6  | 1.5354(12) |
| C1-C2  | 1.5594(12) | C1-H1  | 1.0        |
| C2-C20 | 1.5254(12) | C2-C3  | 1.5411(12) |
| C2-C7  | 1.5511(12) | C3-C4  | 1.5254(13) |
| C3-H3A | 0.99       | C3-H3B | 0.99       |
| C4-C5  | 1.5250(14) | C4-H4A | 0.99       |
| C4-H4B | 0.99       | C5-C6  | 1.5365(13) |
| C5-H5A | 0.99       | C5-H5B | 0.99       |
| C6-C10 | 1.4679(13) | C6-H6  | 1.0        |
| C7-C8  | 1.5077(12) | C7-H7A | 0.99       |
| C7-H7B | 0.99       | C9-H9A | 0.98       |
| C9-H9B | 0.98       | C9-H9C | 0.98       |

|          |            |          |            |
|----------|------------|----------|------------|
| C10-C11  | 1.2054(13) | C11-C12  | 1.3719(14) |
| C12-C13  | 1.2113(14) | C13-C14  | 1.4309(14) |
| C14-C19  | 1.3990(15) | C14-C15  | 1.4004(14) |
| C15-C16  | 1.3878(16) | C15-H15  | 0.95       |
| C16-C17  | 1.3857(19) | C16-H16  | 0.95       |
| C17-C18  | 1.3920(18) | C17-H17  | 0.95       |
| C18-C19  | 1.3884(15) | C18-H18  | 0.95       |
| C19-H19  | 0.95       | C20-C21  | 1.3856(12) |
| C20-C25  | 1.4041(12) | C21-C22  | 1.3993(12) |
| C21-H21  | 0.95       | C22-C23  | 1.3850(13) |
| C22-H22  | 0.95       | C23-C24  | 1.4051(13) |
| C24-C25  | 1.3844(13) | C25-H25  | 0.95       |
| C26-H26A | 0.98       | C26-H26B | 0.98       |
| C26-H26C | 0.98       | C27-H27A | 0.98       |
| C27-H27B | 0.98       | C27-H27C | 0.98       |
| O1S-C1S  | 1.1904(18) | O2S-C1S  | 1.3756(16) |
| O2S-C3S  | 1.4590(18) | C1S-C2S  | 1.4913(19) |
| C2S-H2SA | 0.98       | C2S-H2SB | 0.98       |
| C2S-H2SC | 0.98       | C3S-C4S  | 1.500(2)   |
| C3S-H3SA | 0.99       | C3S-H3SB | 0.99       |
| C4S-H4SA | 0.98       | C4S-H4SB | 0.98       |
| C4S-H4SC | 0.98       |          |            |

**Bond angles (°) for rds624.**

|            |           |            |           |
|------------|-----------|------------|-----------|
| N1-O2-C9   | 109.36(7) | C23-O3-C26 | 116.83(8) |
| C24-O4-C27 | 116.41(9) | C8-N1-O2   | 117.05(7) |
| C8-N1-C1   | 113.08(7) | O2-N1-C1   | 117.51(7) |
| N1-C1-C6   | 112.37(7) | N1-C1-C2   | 99.77(6)  |
| C6-C1-C2   | 116.31(7) | N1-C1-H1   | 109.3     |
| C6-C1-H1   | 109.3     | C2-C1-H1   | 109.3     |
| C20-C2-C3  | 114.05(7) | C20-C2-C7  | 111.58(7) |
| C3-C2-C7   | 107.26(7) | C20-C2-C1  | 112.17(7) |
| C3-C2-C1   | 109.35(7) | C7-C2-C1   | 101.61(7) |
| C4-C3-C2   | 114.29(7) | C4-C3-H3A  | 108.7     |
| C2-C3-H3A  | 108.7     | C4-C3-H3B  | 108.7     |
| C2-C3-H3B  | 108.7     | H3A-C3-H3B | 107.6     |
| C5-C4-C3   | 109.77(8) | C5-C4-H4A  | 109.7     |
| C3-C4-H4A  | 109.7     | C5-C4-H4B  | 109.7     |
| C3-C4-H4B  | 109.7     | H4A-C4-H4B | 108.2     |
| C4-C5-C6   | 110.76(7) | C4-C5-H5A  | 109.5     |
| C6-C5-H5A  | 109.5     | C4-C5-H5B  | 109.5     |
| C6-C5-H5B  | 109.5     | H5A-C5-H5B | 108.1     |
| C10-C6-C1  | 108.91(7) | C10-C6-C5  | 111.57(8) |

|               |            |               |            |
|---------------|------------|---------------|------------|
| C1-C6-C5      | 112.87(7)  | C10-C6-H6     | 107.8      |
| C1-C6-H6      | 107.8      | C5-C6-H6      | 107.8      |
| C8-C7-C2      | 104.87(7)  | C8-C7-H7A     | 110.8      |
| C2-C7-H7A     | 110.8      | C8-C7-H7B     | 110.8      |
| C2-C7-H7B     | 110.8      | H7A-C7-H7B    | 108.8      |
| O1-C8-N1      | 124.50(8)  | O1-C8-C7      | 128.95(8)  |
| N1-C8-C7      | 106.55(7)  | O2-C9-H9A     | 109.5      |
| O2-C9-H9B     | 109.5      | H9A-C9-H9B    | 109.5      |
| O2-C9-H9C     | 109.5      | H9A-C9-H9C    | 109.5      |
| H9B-C9-H9C    | 109.5      | C11-C10-C6    | 178.46(11) |
| C10-C11-C12   | 177.79(11) | C13-C12-C11   | 176.56(12) |
| C12-C13-C14   | 175.24(12) | C19-C14-C15   | 119.43(9)  |
| C19-C14-C13   | 120.36(9)  | C15-C14-C13   | 120.15(10) |
| C16-C15-C14   | 120.04(11) | C16-C15-H15   | 120.0      |
| C14-C15-H15   | 120.0      | C17-C16-C15   | 120.24(10) |
| C17-C16-H16   | 119.9      | C15-C16-H16   | 119.9      |
| C16-C17-C18   | 120.14(10) | C16-C17-H17   | 119.9      |
| C18-C17-H17   | 119.9      | C19-C18-C17   | 120.03(11) |
| C19-C18-H18   | 120.0      | C17-C18-H18   | 120.0      |
| C18-C19-C14   | 120.10(10) | C18-C19-H19   | 120.0      |
| C14-C19-H19   | 120.0      | C21-C20-C25   | 117.74(8)  |
| C21-C20-C2    | 122.73(7)  | C25-C20-C2    | 119.46(8)  |
| C20-C21-C22   | 121.58(8)  | C20-C21-H21   | 119.2      |
| C22-C21-H21   | 119.2      | C23-C22-C21   | 120.25(8)  |
| C23-C22-H22   | 119.9      | C21-C22-H22   | 119.9      |
| O3-C23-C22    | 125.26(8)  | O3-C23-C24    | 115.90(8)  |
| C22-C23-C24   | 118.84(8)  | O4-C24-C25    | 123.53(9)  |
| O4-C24-C23    | 116.11(8)  | C25-C24-C23   | 120.32(8)  |
| C24-C25-C20   | 121.26(8)  | C24-C25-H25   | 119.4      |
| C20-C25-H25   | 119.4      | O3-C26-H26A   | 109.5      |
| O3-C26-H26B   | 109.5      | H26A-C26-H26B | 109.5      |
| O3-C26-H26C   | 109.5      | H26A-C26-H26C | 109.5      |
| H26B-C26-H26C | 109.5      | O4-C27-H27A   | 109.5      |
| O4-C27-H27B   | 109.5      | H27A-C27-H27B | 109.5      |
| O4-C27-H27C   | 109.5      | H27A-C27-H27C | 109.5      |
| H27B-C27-H27C | 109.5      | C1S-O2S-C3S   | 115.32(11) |
| O1S-C1S-O2S   | 122.80(14) | O1S-C1S-C2S   | 125.54(14) |
| O2S-C1S-C2S   | 111.37(11) | C1S-C2S-H2SA  | 109.5      |
| C1S-C2S-H2SB  | 109.5      | H2SA-C2S-H2SB | 109.5      |
| C1S-C2S-H2SC  | 109.5      | H2SA-C2S-H2SC | 109.5      |
| H2SB-C2S-H2SC | 109.5      | O2S-C3S-C4S   | 108.25(13) |
| O2S-C3S-H3SA  | 110.0      | C4S-C3S-H3SA  | 110.0      |
| O2S-C3S-H3SB  | 110.0      | C4S-C3S-H3SB  | 110.0      |



|               |       |               |       |
|---------------|-------|---------------|-------|
| H3SA-C3S-H3SB | 108.4 | C3S-C4S-H4SA  | 109.5 |
| C3S-C4S-H4SB  | 109.5 | H4SA-C4S-H4SB | 109.5 |
| C3S-C4S-H4SC  | 109.5 | H4SA-C4S-H4SC | 109.5 |
| H4SB-C4S-H4SC | 109.5 |               |       |

**Torsion angles (°) for rds624.**

|                 |             |                 |             |
|-----------------|-------------|-----------------|-------------|
| C9-O2-N1-C8     | 91.77(10)   | C9-O2-N1-C1     | -128.56(9)  |
| C8-N1-C1-C6     | -158.40(8)  | O2-N1-C1-C6     | 60.40(10)   |
| C8-N1-C1-C2     | -34.54(9)   | O2-N1-C1-C2     | -175.74(7)  |
| N1-C1-C2-C20    | 154.98(7)   | C6-C1-C2-C20    | -83.96(9)   |
| N1-C1-C2-C3     | -77.46(8)   | C6-C1-C2-C3     | 43.61(9)    |
| N1-C1-C2-C7     | 35.70(8)    | C6-C1-C2-C7     | 156.76(7)   |
| C20-C2-C3-C4    | 75.72(10)   | C7-C2-C3-C4     | -160.19(7)  |
| C1-C2-C3-C4     | -50.78(10)  | C2-C3-C4-C5     | 60.09(10)   |
| C3-C4-C5-C6     | -58.85(10)  | N1-C1-C6-C10    | -167.35(8)  |
| C2-C1-C6-C10    | 78.56(9)    | N1-C1-C6-C5     | 68.16(10)   |
| C2-C1-C6-C5     | -45.94(10)  | C4-C5-C6-C10    | -70.62(10)  |
| C4-C5-C6-C1     | 52.41(10)   | C20-C2-C7-C8    | -147.17(7)  |
| C3-C2-C7-C8     | 87.25(8)    | C1-C2-C7-C8     | -27.46(8)   |
| O2-N1-C8-O1     | -20.22(13)  | C1-N1-C8-O1     | -161.61(9)  |
| O2-N1-C8-C7     | 158.88(7)   | C1-N1-C8-C7     | 17.48(10)   |
| C2-C7-C8-O1     | -173.10(9)  | C2-C7-C8-N1     | 7.86(9)     |
| C19-C14-C15-C16 | -0.79(17)   | C13-C14-C15-C16 | 176.47(11)  |
| C14-C15-C16-C17 | -0.29(19)   | C15-C16-C17-C18 | 0.72(19)    |
| C16-C17-C18-C19 | -0.05(19)   | C17-C18-C19-C14 | -1.04(19)   |
| C15-C14-C19-C18 | 1.46(17)    | C13-C14-C19-C18 | -175.80(11) |
| C3-C2-C20-C21   | 11.78(12)   | C7-C2-C20-C21   | -109.95(9)  |
| C1-C2-C20-C21   | 136.80(8)   | C3-C2-C20-C25   | -171.28(8)  |
| C7-C2-C20-C25   | 66.99(10)   | C1-C2-C20-C25   | -46.27(10)  |
| C25-C20-C21-C22 | -0.12(13)   | C2-C20-C21-C22  | 176.87(8)   |
| C20-C21-C22-C23 | -0.05(14)   | C26-O3-C23-C22  | 4.57(14)    |
| C26-O3-C23-C24  | -175.15(9)  | C21-C22-C23-O3  | -179.11(9)  |
| C21-C22-C23-C24 | 0.60(14)    | C27-O4-C24-C25  | 35.73(18)   |
| C27-O4-C24-C23  | -146.60(12) | O3-C23-C24-O4   | 1.00(14)    |
| C22-C23-C24-O4  | -178.74(10) | O3-C23-C24-C25  | 178.74(9)   |
| C22-C23-C24-C25 | -0.99(15)   | O4-C24-C25-C20  | 178.42(10)  |
| C23-C24-C25-C20 | 0.85(15)    | C21-C20-C25-C24 | -0.29(14)   |
| C2-C20-C25-C24  | -177.38(9)  | C3S-O2S-C1S-O1S | 1.6(2)      |
| C3S-O2S-C1S-C2S | 175.66(12)  | C1S-O2S-C3S-C4S | 178.88(13)  |

**Anisotropic atomic displacement parameters (Å<sup>2</sup>) for rds624.**

The anisotropic atomic displacement factor exponent takes the form:  $-2\pi^2 [ h^2 a^{*2} U_{11} + \dots + 2 h k a^* b^* U_{12} ]$

$U_{11}$

$U_{22}$

$U_{33}$

$U_{23}$

$U_{13}$

$U_{12}$

|     | U <sub>11</sub> | U <sub>22</sub> | U <sub>33</sub> | U <sub>23</sub> | U <sub>13</sub> | U <sub>12</sub> |
|-----|-----------------|-----------------|-----------------|-----------------|-----------------|-----------------|
| O1  | 0.0182(3)       | 0.0123(3)       | 0.0158(3)       | 0.0042(2)       | -0.0022(2)      | 0.0022(2)       |
| O2  | 0.0146(3)       | 0.0230(3)       | 0.0083(3)       | -0.0004(2)      | -0.0003(2)      | 0.0009(2)       |
| O3  | 0.0122(3)       | 0.0280(4)       | 0.0139(3)       | 0.0018(3)       | -0.0042(2)      | -0.0032(3)      |
| O4  | 0.0133(3)       | 0.0638(7)       | 0.0155(3)       | 0.0010(4)       | 0.0015(3)       | -0.0152(4)      |
| N1  | 0.0137(3)       | 0.0114(3)       | 0.0081(3)       | 0.0002(2)       | -0.0012(2)      | 0.0013(2)       |
| C1  | 0.0096(3)       | 0.0096(3)       | 0.0106(3)       | 0.0003(3)       | -0.0004(2)      | 0.0002(2)       |
| C2  | 0.0096(3)       | 0.0087(3)       | 0.0097(3)       | 0.0009(2)       | 0.0002(2)       | -0.0002(2)      |
| C3  | 0.0095(3)       | 0.0123(3)       | 0.0129(3)       | 0.0020(3)       | 0.0009(3)       | -0.0002(3)      |
| C4  | 0.0135(4)       | 0.0122(3)       | 0.0183(4)       | 0.0038(3)       | 0.0010(3)       | -0.0025(3)      |
| C5  | 0.0138(4)       | 0.0106(3)       | 0.0209(4)       | -0.0008(3)      | -0.0010(3)      | -0.0025(3)      |
| C6  | 0.0119(3)       | 0.0103(3)       | 0.0151(4)       | -0.0013(3)      | -0.0011(3)      | 0.0018(3)       |
| C7  | 0.0159(4)       | 0.0087(3)       | 0.0113(3)       | 0.0003(3)       | -0.0016(3)      | 0.0006(3)       |
| C8  | 0.0117(3)       | 0.0104(3)       | 0.0119(3)       | 0.0018(3)       | 0.0002(3)       | -0.0004(3)      |
| C9  | 0.0183(4)       | 0.0321(5)       | 0.0171(4)       | -0.0070(4)      | -0.0056(3)      | -0.0002(4)      |
| C10 | 0.0147(4)       | 0.0117(3)       | 0.0182(4)       | -0.0014(3)      | 0.0005(3)       | 0.0020(3)       |
| C11 | 0.0150(4)       | 0.0141(4)       | 0.0198(4)       | -0.0002(3)      | 0.0008(3)       | 0.0023(3)       |
| C12 | 0.0144(4)       | 0.0168(4)       | 0.0211(4)       | 0.0010(3)       | 0.0006(3)       | 0.0021(3)       |
| C13 | 0.0136(4)       | 0.0187(4)       | 0.0222(4)       | 0.0001(3)       | -0.0002(3)      | 0.0016(3)       |
| C14 | 0.0111(3)       | 0.0188(4)       | 0.0183(4)       | -0.0001(3)      | -0.0015(3)      | 0.0019(3)       |
| C15 | 0.0129(4)       | 0.0252(5)       | 0.0257(5)       | 0.0024(4)       | -0.0012(3)      | -0.0014(3)      |
| C16 | 0.0110(4)       | 0.0388(6)       | 0.0269(5)       | 0.0012(5)       | -0.0005(4)      | 0.0007(4)       |
| C17 | 0.0160(4)       | 0.0344(6)       | 0.0264(5)       | -0.0025(4)      | -0.0035(4)      | 0.0101(4)       |
| C18 | 0.0207(5)       | 0.0227(5)       | 0.0301(6)       | 0.0022(4)       | -0.0056(4)      | 0.0061(4)       |
| C19 | 0.0136(4)       | 0.0216(4)       | 0.0265(5)       | 0.0032(4)       | -0.0027(3)      | 0.0013(3)       |
| C20 | 0.0094(3)       | 0.0091(3)       | 0.0105(3)       | 0.0005(3)       | -0.0002(2)      | -0.0008(2)      |
| C21 | 0.0113(3)       | 0.0133(3)       | 0.0119(3)       | 0.0030(3)       | -0.0005(3)      | -0.0022(3)      |
| C22 | 0.0126(3)       | 0.0146(4)       | 0.0118(3)       | 0.0027(3)       | -0.0018(3)      | -0.0020(3)      |
| C23 | 0.0109(3)       | 0.0142(4)       | 0.0122(3)       | -0.0009(3)      | -0.0019(3)      | -0.0007(3)      |
| C24 | 0.0101(3)       | 0.0218(4)       | 0.0124(4)       | -0.0003(3)      | 0.0006(3)       | -0.0036(3)      |
| C25 | 0.0115(3)       | 0.0178(4)       | 0.0108(3)       | 0.0013(3)       | 0.0002(3)       | -0.0035(3)      |
| C26 | 0.0194(4)       | 0.0240(5)       | 0.0153(4)       | 0.0037(3)       | -0.0061(3)      | -0.0033(4)      |
| C27 | 0.0145(4)       | 0.0742(11)      | 0.0196(5)       | 0.0081(6)       | 0.0054(4)       | -0.0002(5)      |
| O1S | 0.0310(6)       | 0.0538(8)       | 0.0648(9)       | -0.0054(7)      | -0.0041(5)      | 0.0022(5)       |
| O2S | 0.0234(4)       | 0.0292(5)       | 0.0416(6)       | -0.0029(4)      | 0.0031(4)       | 0.0001(3)       |
| C1S | 0.0229(5)       | 0.0282(6)       | 0.0326(6)       | -0.0050(5)      | -0.0014(4)      | 0.0005(4)       |
| C2S | 0.0294(6)       | 0.0305(6)       | 0.0329(6)       | -0.0003(5)      | -0.0015(5)      | -0.0034(5)      |
| C3S | 0.0328(7)       | 0.0292(6)       | 0.0485(9)       | -0.0061(6)      | 0.0041(6)       | -0.0022(5)      |
| C4S | 0.0521(10)      | 0.0357(8)       | 0.0527(10)      | 0.0003(7)       | 0.0209(8)       | 0.0111(7)       |

**Hydrogen atomic coordinates and isotropic atomic displacement parameters ( $\text{\AA}^2$ ) for rds624.**

|    | x/a    | y/b    | z/c    | U(eq) |
|----|--------|--------|--------|-------|
| H1 | 0.4549 | 0.1815 | 0.4428 | 0.012 |

|      | <b>x/a</b> | <b>y/b</b> | <b>z/c</b> | <b>U(eq)</b> |
|------|------------|------------|------------|--------------|
| H3A  | 0.6735     | 0.1966     | 0.3439     | 0.014        |
| H3B  | 0.6269     | 0.2060     | 0.2547     | 0.014        |
| H4A  | 0.6732     | 0.3967     | 0.2994     | 0.018        |
| H4B  | 0.5655     | 0.3943     | 0.2870     | 0.018        |
| H5A  | 0.6077     | 0.4849     | 0.4135     | 0.018        |
| H5B  | 0.6631     | 0.3681     | 0.4412     | 0.018        |
| H6   | 0.5267     | 0.3579     | 0.5025     | 0.015        |
| H7A  | 0.5085     | -0.0207    | 0.3525     | 0.014        |
| H7B  | 0.6076     | 0.0046     | 0.3214     | 0.014        |
| H9A  | 0.6776     | 0.1720     | 0.6507     | 0.034        |
| H9B  | 0.6869     | 0.2650     | 0.5780     | 0.034        |
| H9C  | 0.7175     | 0.1295     | 0.5671     | 0.034        |
| H15  | 0.0590     | 0.4918     | 0.3501     | 0.026        |
| H16  | -0.0721    | 0.6035     | 0.3255     | 0.031        |
| H17  | -0.0640    | 0.7962     | 0.2735     | 0.031        |
| H18  | 0.0754     | 0.8774     | 0.2434     | 0.03         |
| H19  | 0.2069     | 0.7653     | 0.2653     | 0.025        |
| H21  | 0.5140     | 0.2417     | 0.1864     | 0.015        |
| H22  | 0.3871     | 0.2456     | 0.0968     | 0.016        |
| H25  | 0.3644     | 0.1041     | 0.3614     | 0.016        |
| H26A | 0.2509     | 0.2880     | 0.0412     | 0.03         |
| H26B | 0.1680     | 0.2019     | 0.0169     | 0.03         |
| H26C | 0.2688     | 0.1517     | 0.0185     | 0.03         |
| H27A | 0.2256     | 0.0647     | 0.3932     | 0.054        |
| H27B | 0.1244     | 0.0949     | 0.3623     | 0.054        |
| H27C | 0.1978     | 0.1989     | 0.3709     | 0.054        |
| H2SA | 0.1695     | 0.9094     | -0.0013    | 0.047        |
| H2SB | 0.1599     | 0.9415     | 0.0924     | 0.047        |
| H2SC | 0.0871     | 0.9897     | 0.0254     | 0.047        |
| H3SA | 0.0335     | 0.5860     | 0.0342     | 0.044        |
| H3SB | 0.0443     | 0.6127     | 0.1299     | 0.044        |
| H4SA | 0.1814     | 0.5028     | 0.0414     | 0.069        |
| H4SB | 0.1140     | 0.4297     | 0.0952     | 0.069        |
| H4SC | 0.1847     | 0.5205     | 0.1378     | 0.069        |

### 3. Crystal Structure Report for rds625 (17a-minor)

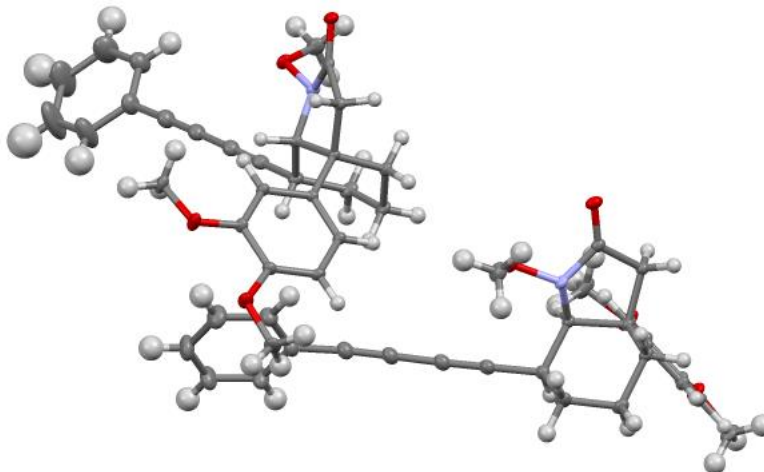

A colorless plate-like specimen of  $C_{58}H_{62}N_2O_{10}$ , approximate dimensions 0.098 mm x 0.225 mm x 0.352 mm, was used for the X-ray crystallographic analysis. The X-ray intensity data were measured.

The total exposure time was 28.09 hours. The frames were integrated with the Bruker SAINT software package using a narrow-frame algorithm. The integration of the data using a triclinic unit cell yielded a total of 98492 reflections to a maximum  $\theta$  angle of  $30.59^\circ$  (0.70 Å resolution), of which 15311 were independent (average redundancy 6.433, completeness = 99.6%,  $R_{int} = 4.16\%$ ,  $R_{sig} = 3.23\%$ ) and 11862 (77.47%) were greater than  $2\sigma(F^2)$ . The final cell constants of  $a = 10.3428(7)$  Å,  $b = 16.0861(11)$  Å,  $c = 17.3663(12)$  Å,  $\alpha = 65.705(3)^\circ$ ,  $\beta = 73.172(4)^\circ$ ,  $\gamma = 89.520(4)^\circ$ , volume =  $2500.3(3)$  Å<sup>3</sup>, are based upon the refinement of the XYZ-centroids of 9798 reflections above  $20\sigma(I)$  with  $4.656^\circ < 2\theta < 60.92^\circ$ . Data were corrected for absorption effects using the Multi-Scan method (SADABS). The ratio of minimum to maximum apparent transmission was 0.925. The calculated minimum and maximum transmission coefficients (based on crystal size) are 0.9700 and 0.9920.

The final anisotropic full-matrix least-squares refinement on  $F^2$  with 696 variables converged at  $R1 = 6.16\%$ , for the observed data and  $wR2 = 17.71\%$  for all data. The goodness-of-fit was 1.098. The largest peak in the final difference electron density synthesis was  $0.664 e^-/\text{Å}^3$  and the largest hole was  $-0.485 e^-/\text{Å}^3$  with an RMS deviation of  $0.068 e^-/\text{Å}^3$ . On the basis of the final model, the calculated density was  $1.258 \text{ g/cm}^3$  and  $F(000)$ ,  $1008 e^-$ .

#### Sample and crystal data for rds625.

|                      |                            |                            |
|----------------------|----------------------------|----------------------------|
| Identification code  | rds625                     |                            |
| Chemical formula     | $C_{58}H_{62}N_2O_{10}$    |                            |
| Formula weight       | 947.09 g/mol               |                            |
| Temperature          | 100(2) K                   |                            |
| Wavelength           | 0.71073 Å                  |                            |
| Crystal size         | 0.098 x 0.225 x 0.352 mm   |                            |
| Crystal habit        | colorless plate            |                            |
| Crystal system       | triclinic                  |                            |
| Space group          | P -1                       |                            |
| Unit cell dimensions | $a = 10.3428(7)$ Å         | $\alpha = 65.705(3)^\circ$ |
|                      | $b = 16.0861(11)$ Å        | $\beta = 73.172(4)^\circ$  |
|                      | $c = 17.3663(12)$ Å        | $\gamma = 89.520(4)^\circ$ |
| Volume               | $2500.3(3)$ Å <sup>3</sup> |                            |
| Z                    | 2                          |                            |
| Density (calculated) | $1.258 \text{ g/cm}^3$     |                            |

**Absorption coefficient** 0.086 mm<sup>-1</sup>  
**F(000)** 1008

**Data collection and structure refinement for rds625.**

**Theta range for data collection** 1.48 to 30.59°  
**Index ranges** -14<=h<=14, -22<=k<=22, -24<=l<=24  
**Reflections collected** 98492  
**Independent reflections** 15311 [R(int) = 0.0416]  
**Coverage of independent reflections** 99.6%  
**Absorption correction** Multi-Scan  
**Max. and min. transmission** 0.9920 and 0.9700  
**Refinement method** Full-matrix least-squares on F<sup>2</sup>  
**Refinement program** SHELXL-2014/7 (Sheldrick, 2014)  
**Function minimized**  $\Sigma w(F_o^2 - F_c^2)^2$   
**Data / restraints / parameters** 15311 / 70 / 696  
**Goodness-of-fit on F<sup>2</sup>** 1.098  
**Final R indices** 11862 data; I>2 $\sigma$ (I) R1 = 0.0616, wR2 = 0.1663  
all data R1 = 0.0813, wR2 = 0.1771  
**Weighting scheme**  $w=1/[\sigma^2(F_o^2)+(0.0750P)^2+2.1946P]$   
where  $P=(F_o^2+2F_c^2)/3$   
**Largest diff. peak and hole** 0.664 and -0.485 eÅ<sup>-3</sup>  
**R.M.S. deviation from mean** 0.068 eÅ<sup>-3</sup>

**Atomic coordinates and equivalent isotropic atomic displacement parameters (Å<sup>2</sup>) for rds625.**

U(eq) is defined as one third of the trace of the orthogonalized U<sub>ij</sub> tensor.

|     | <b>x/a</b>  | <b>y/b</b>  | <b>z/c</b>  | <b>U(eq)</b> |
|-----|-------------|-------------|-------------|--------------|
| O1  | 0.14864(12) | 0.06430(8)  | 0.42312(8)  | 0.0166(2)    |
| O2  | 0.18174(12) | 0.96240(8)  | 0.58399(8)  | 0.0163(2)    |
| O3  | 0.42852(12) | 0.17598(8)  | 0.75151(9)  | 0.0209(3)    |
| O4  | 0.49008(12) | 0.03146(8)  | 0.72538(9)  | 0.0222(3)    |
| N1  | 0.12870(13) | 0.04657(9)  | 0.56441(9)  | 0.0133(2)    |
| C1  | 0.02133(15) | 0.05484(10) | 0.63677(10) | 0.0122(3)    |
| C2  | 0.98180(15) | 0.15110(10) | 0.58432(10) | 0.0116(3)    |
| C3  | 0.09017(16) | 0.22744(11) | 0.56759(11) | 0.0146(3)    |
| C4  | 0.12166(17) | 0.21867(11) | 0.65108(12) | 0.0177(3)    |
| C5  | 0.17219(18) | 0.12635(12) | 0.69346(12) | 0.0200(3)    |
| C6  | 0.06491(17) | 0.04753(11) | 0.71651(11) | 0.0160(3)    |
| C7  | 0.99631(16) | 0.14902(11) | 0.49363(10) | 0.0137(3)    |
| C8  | 0.09958(15) | 0.08374(10) | 0.48562(10) | 0.0133(3)    |
| C9  | 0.32547(17) | 0.97835(13) | 0.56474(13) | 0.0222(3)    |
| C10 | 0.10492(18) | 0.95641(12) | 0.76063(11) | 0.0187(3)    |
| C11 | 0.13623(19) | 0.88119(13) | 0.79622(12) | 0.0210(3)    |
| C12 | 0.17008(19) | 0.79456(13) | 0.83722(12) | 0.0225(3)    |

|     | <b>x/a</b>  | <b>y/b</b>  | <b>z/c</b>  | <b>U(eq)</b> |
|-----|-------------|-------------|-------------|--------------|
| C13 | 0.1981(2)   | 0.71842(13) | 0.87401(12) | 0.0252(4)    |
| C14 | 0.2327(2)   | 0.62871(14) | 0.91930(14) | 0.0296(4)    |
| C15 | 0.3534(2)   | 0.60117(15) | 0.88168(15) | 0.0332(5)    |
| C16 | 0.3878(3)   | 0.51524(18) | 0.9273(2)   | 0.0506(7)    |
| C17 | 0.3050(4)   | 0.4582(2)   | 0.0119(2)   | 0.0712(11)   |
| C18 | 0.1865(4)   | 0.4852(2)   | 0.0506(2)   | 0.0784(13)   |
| C19 | 0.1479(3)   | 0.56981(19) | 0.00403(19) | 0.0547(8)    |
| C20 | 0.83673(15) | 0.16131(10) | 0.63015(10) | 0.0117(3)    |
| C21 | 0.80139(16) | 0.23843(10) | 0.64463(10) | 0.0136(3)    |
| C22 | 0.66569(16) | 0.24558(11) | 0.68547(11) | 0.0147(3)    |
| C23 | 0.56334(16) | 0.17574(11) | 0.71218(11) | 0.0147(3)    |
| C24 | 0.59711(16) | 0.09691(11) | 0.69786(11) | 0.0152(3)    |
| C25 | 0.73097(16) | 0.09077(10) | 0.65703(11) | 0.0140(3)    |
| C26 | 0.39058(19) | 0.25366(13) | 0.76911(13) | 0.0247(4)    |
| C27 | 0.52330(18) | 0.94497(12) | 0.72624(14) | 0.0227(4)    |
| O5  | 0.42083(13) | 0.56417(8)  | 0.42335(8)  | 0.0178(2)    |
| O6  | 0.23903(12) | 0.46253(8)  | 0.58630(8)  | 0.0171(2)    |
| O7  | 0.83718(13) | 0.67723(8)  | 0.74236(9)  | 0.0205(3)    |
| O8  | 0.80234(14) | 0.53297(9)  | 0.71591(10) | 0.0238(3)    |
| N2  | 0.30920(14) | 0.54707(9)  | 0.56511(9)  | 0.0142(3)    |
| C28 | 0.35035(16) | 0.55643(10) | 0.63579(10) | 0.0130(3)    |
| C29 | 0.43821(15) | 0.65262(10) | 0.58146(10) | 0.0120(3)    |
| C30 | 0.34395(16) | 0.72896(11) | 0.56610(11) | 0.0149(3)    |
| C31 | 0.23435(17) | 0.72050(11) | 0.65068(12) | 0.0180(3)    |
| C32 | 0.14474(17) | 0.62788(12) | 0.69534(13) | 0.0208(3)    |
| C33 | 0.23346(17) | 0.54970(11) | 0.71681(11) | 0.0168(3)    |
| C34 | 0.50756(16) | 0.64992(11) | 0.49077(10) | 0.0141(3)    |
| C35 | 0.41180(16) | 0.58408(11) | 0.48509(11) | 0.0140(3)    |
| C36 | 0.11107(18) | 0.47772(13) | 0.57021(14) | 0.0249(4)    |
| C37 | 0.15291(18) | 0.45850(12) | 0.76421(12) | 0.0194(3)    |
| C38 | 0.08650(18) | 0.38422(13) | 0.80206(12) | 0.0213(3)    |
| C39 | 0.00992(19) | 0.29901(13) | 0.84309(12) | 0.0221(3)    |
| C40 | 0.94234(19) | 0.22529(13) | 0.87917(12) | 0.0233(4)    |
| C41 | 0.85467(19) | 0.13969(12) | 0.92560(12) | 0.0229(3)    |
| C42 | 0.7840(2)   | 0.10997(14) | 0.88204(13) | 0.0270(4)    |
| C43 | 0.6934(3)   | 0.03020(16) | 0.92894(16) | 0.0369(5)    |
| C44 | 0.6712(3)   | 0.98003(16) | 0.01993(16) | 0.0388(5)    |
| C45 | 0.7403(3)   | 0.00882(15) | 0.06357(14) | 0.0358(5)    |
| C46 | 0.8322(2)   | 0.08807(15) | 0.01703(13) | 0.0323(5)    |
| C47 | 0.54145(15) | 0.66300(10) | 0.62544(10) | 0.0123(3)    |
| C48 | 0.56089(16) | 0.73937(11) | 0.64099(11) | 0.0145(3)    |
| C49 | 0.65848(16) | 0.74647(11) | 0.68026(11) | 0.0152(3)    |

|     | <b>x/a</b>  | <b>y/b</b>  | <b>z/c</b>  | <b>U(eq)</b> |
|-----|-------------|-------------|-------------|--------------|
| C50 | 0.73832(16) | 0.67698(11) | 0.70478(11) | 0.0150(3)    |
| C51 | 0.72032(17) | 0.59893(11) | 0.68948(11) | 0.0159(3)    |
| C52 | 0.62380(16) | 0.59300(11) | 0.65022(11) | 0.0148(3)    |
| C53 | 0.8518(2)   | 0.75214(13) | 0.76472(13) | 0.0241(4)    |
| C54 | 0.7683(2)   | 0.44653(12) | 0.71754(15) | 0.0259(4)    |
| O1S | 0.2715(4)   | 0.1303(3)   | 0.1306(3)   | 0.0438(9)    |
| O2S | 0.3973(3)   | 0.2364(3)   | 0.9972(3)   | 0.0476(9)    |
| C1S | 0.2821(5)   | 0.1859(4)   | 0.0539(4)   | 0.0410(11)   |
| C2S | 0.1676(5)   | 0.2103(9)   | 0.0161(4)   | 0.071(2)     |
| C3S | 0.5165(4)   | 0.2230(3)   | 0.0259(3)   | 0.0388(10)   |
| C4S | 0.6279(5)   | 0.2914(3)   | 0.9531(3)   | 0.0479(12)   |
| O1T | 0.3320(12)  | 0.1724(9)   | 0.0932(7)   | 0.079(3)     |
| O2T | 0.4189(7)   | 0.2598(7)   | 0.9491(7)   | 0.062(2)     |
| C1T | 0.3194(15)  | 0.2242(12)  | 0.0203(9)   | 0.070(4)     |
| C2T | 0.1817(19)  | 0.237(3)    | 0.0064(18)  | 0.168(16)    |
| C3T | 0.5526(8)   | 0.2354(7)   | 0.9574(6)   | 0.052(2)     |
| C4T | 0.6016(18)  | 0.2886(14)  | 0.9986(16)  | 0.120(8)     |

**Bond lengths (Å) for rds625.**

|         |            |         |            |
|---------|------------|---------|------------|
| O1-C8   | 1.2211(19) | O2-N1   | 1.4023(16) |
| O2-C9   | 1.427(2)   | O3-C23  | 1.3644(19) |
| O3-C26  | 1.430(2)   | O4-C24  | 1.3644(19) |
| O4-C27  | 1.425(2)   | N1-C8   | 1.372(2)   |
| N1-C1   | 1.469(2)   | C1-C6   | 1.537(2)   |
| C1-C2   | 1.562(2)   | C1-H1   | 1.0        |
| C2-C20  | 1.524(2)   | C2-C3   | 1.546(2)   |
| C2-C7   | 1.552(2)   | C3-C4   | 1.527(2)   |
| C3-H3A  | 0.99       | C3-H3B  | 0.99       |
| C4-C5   | 1.526(2)   | C4-H4A  | 0.99       |
| C4-H4B  | 0.99       | C5-C6   | 1.532(2)   |
| C5-H5A  | 0.99       | C5-H5B  | 0.99       |
| C6-C10  | 1.468(2)   | C6-H6   | 1.0        |
| C7-C8   | 1.509(2)   | C7-H7A  | 0.99       |
| C7-H7B  | 0.99       | C9-H9A  | 0.98       |
| C9-H9B  | 0.98       | C9-H9C  | 0.98       |
| C10-C11 | 1.202(3)   | C11-C12 | 1.375(3)   |
| C12-C13 | 1.204(3)   | C13-C14 | 1.431(3)   |
| C14-C15 | 1.393(3)   | C14-C19 | 1.397(3)   |
| C15-C16 | 1.385(3)   | C15-H15 | 0.95       |
| C16-C17 | 1.382(4)   | C16-H16 | 0.95       |
| C17-C18 | 1.378(5)   | C17-H17 | 0.95       |
| C18-C19 | 1.392(4)   | C18-H18 | 0.95       |

|          |            |          |            |
|----------|------------|----------|------------|
| C19-H19  | 0.95       | C20-C21  | 1.390(2)   |
| C20-C25  | 1.411(2)   | C21-C22  | 1.405(2)   |
| C21-H21  | 0.95       | C22-C23  | 1.380(2)   |
| C22-H22  | 0.95       | C23-C24  | 1.412(2)   |
| C24-C25  | 1.384(2)   | C25-H25  | 0.95       |
| C26-H26A | 0.98       | C26-H26B | 0.98       |
| C26-H26C | 0.98       | C27-H27A | 0.98       |
| C27-H27B | 0.98       | C27-H27C | 0.98       |
| O5-C35   | 1.2186(19) | O6-N2    | 1.4005(17) |
| O6-C36   | 1.429(2)   | O7-C50   | 1.3637(19) |
| O7-C53   | 1.431(2)   | O8-C51   | 1.3659(19) |
| O8-C54   | 1.424(2)   | N2-C35   | 1.374(2)   |
| N2-C28   | 1.472(2)   | C28-C33  | 1.531(2)   |
| C28-C29  | 1.561(2)   | C28-H28  | 1.0        |
| C29-C47  | 1.527(2)   | C29-C30  | 1.546(2)   |
| C29-C34  | 1.549(2)   | C30-C31  | 1.528(2)   |
| C30-H30A | 0.99       | C30-H30B | 0.99       |
| C31-C32  | 1.528(2)   | C31-H31A | 0.99       |
| C31-H31B | 0.99       | C32-C33  | 1.535(2)   |
| C32-H32A | 0.99       | C32-H32B | 0.99       |
| C33-C37  | 1.468(2)   | C33-H33  | 1.0        |
| C34-C35  | 1.508(2)   | C34-H34A | 0.99       |
| C34-H34B | 0.99       | C36-H36A | 0.98       |
| C36-H36B | 0.98       | C36-H36C | 0.98       |
| C37-C38  | 1.199(3)   | C38-C39  | 1.379(3)   |
| C39-C40  | 1.199(3)   | C40-C41  | 1.432(3)   |
| C41-C42  | 1.399(3)   | C41-C46  | 1.403(3)   |
| C42-C43  | 1.381(3)   | C42-H42  | 0.95       |
| C43-C44  | 1.394(3)   | C43-H43  | 0.95       |
| C44-C45  | 1.381(3)   | C44-H44  | 0.95       |
| C45-C46  | 1.382(3)   | C45-H45  | 0.95       |
| C46-H46  | 0.95       | C47-C48  | 1.390(2)   |
| C47-C52  | 1.406(2)   | C48-C49  | 1.401(2)   |
| C48-H48  | 0.95       | C49-C50  | 1.382(2)   |
| C49-H49  | 0.95       | C50-C51  | 1.410(2)   |
| C51-C52  | 1.385(2)   | C52-H52  | 0.95       |
| C53-H53A | 0.98       | C53-H53B | 0.98       |
| C53-H53C | 0.98       | C54-H54A | 0.98       |
| C54-H54B | 0.98       | C54-H54C | 0.98       |
| O1S-C1S  | 1.234(6)   | O2S-C1S  | 1.314(6)   |
| O2S-C3S  | 1.442(5)   | C1S-C2S  | 1.490(5)   |
| C2S-H2SA | 0.98       | C2S-H2SB | 0.98       |
| C2S-H2SC | 0.98       | C3S-C4S  | 1.473(6)   |



|          |           |          |           |
|----------|-----------|----------|-----------|
| C3S-H3SA | 0.99      | C3S-H3SB | 0.99      |
| C4S-H4SA | 0.98      | C4S-H4SB | 0.98      |
| C4S-H4SC | 0.98      | O1T-C1T  | 1.240(13) |
| O2T-C1T  | 1.267(13) | O2T-C3T  | 1.466(10) |
| C1T-C2T  | 1.511(15) | C2T-H2TA | 0.98      |
| C2T-H2TB | 0.98      | C2T-H2TC | 0.98      |
| C3T-C4T  | 1.492(12) | C3T-H3TA | 0.99      |
| C3T-H3TB | 0.99      | C4T-H4TA | 0.98      |
| C4T-H4TB | 0.98      | C4T-H4TC | 0.98      |

**Bond angles (°) for rds625.**

|             |            |             |            |
|-------------|------------|-------------|------------|
| N1-O2-C9    | 109.08(12) | C23-O3-C26  | 117.36(13) |
| C24-O4-C27  | 116.38(13) | C8-N1-O2    | 115.72(12) |
| C8-N1-C1    | 111.75(12) | O2-N1-C1    | 117.15(12) |
| N1-C1-C6    | 115.16(13) | N1-C1-C2    | 99.93(12)  |
| C6-C1-C2    | 114.05(12) | N1-C1-H1    | 109.1      |
| C6-C1-H1    | 109.1      | C2-C1-H1    | 109.1      |
| C20-C2-C3   | 113.99(12) | C20-C2-C7   | 111.89(12) |
| C3-C2-C7    | 107.70(12) | C20-C2-C1   | 111.43(12) |
| C3-C2-C1    | 109.65(12) | C7-C2-C1    | 101.41(11) |
| C4-C3-C2    | 114.13(13) | C4-C3-H3A   | 108.7      |
| C2-C3-H3A   | 108.7      | C4-C3-H3B   | 108.7      |
| C2-C3-H3B   | 108.7      | H3A-C3-H3B  | 107.6      |
| C5-C4-C3    | 110.13(13) | C5-C4-H4A   | 109.6      |
| C3-C4-H4A   | 109.6      | C5-C4-H4B   | 109.6      |
| C3-C4-H4B   | 109.6      | H4A-C4-H4B  | 108.1      |
| C4-C5-C6    | 110.04(13) | C4-C5-H5A   | 109.7      |
| C6-C5-H5A   | 109.7      | C4-C5-H5B   | 109.7      |
| C6-C5-H5B   | 109.7      | H5A-C5-H5B  | 108.2      |
| C10-C6-C5   | 112.91(14) | C10-C6-C1   | 110.97(13) |
| C5-C6-C1    | 113.39(14) | C10-C6-H6   | 106.3      |
| C5-C6-H6    | 106.3      | C1-C6-H6    | 106.3      |
| C8-C7-C2    | 104.89(12) | C8-C7-H7A   | 110.8      |
| C2-C7-H7A   | 110.8      | C8-C7-H7B   | 110.8      |
| C2-C7-H7B   | 110.8      | H7A-C7-H7B  | 108.8      |
| O1-C8-N1    | 124.59(15) | O1-C8-C7    | 128.40(15) |
| N1-C8-C7    | 107.00(13) | O2-C9-H9A   | 109.5      |
| O2-C9-H9B   | 109.5      | H9A-C9-H9B  | 109.5      |
| O2-C9-H9C   | 109.5      | H9A-C9-H9C  | 109.5      |
| H9B-C9-H9C  | 109.5      | C11-C10-C6  | 178.87(18) |
| C10-C11-C12 | 179.1(2)   | C13-C12-C11 | 179.1(2)   |
| C12-C13-C14 | 178.4(2)   | C15-C14-C19 | 119.5(2)   |
| C15-C14-C13 | 120.67(19) | C19-C14-C13 | 119.7(2)   |

|               |            |               |            |
|---------------|------------|---------------|------------|
| C16-C15-C14   | 120.2(2)   | C16-C15-H15   | 119.9      |
| C14-C15-H15   | 119.9      | C17-C16-C15   | 119.9(2)   |
| C17-C16-H16   | 120.0      | C15-C16-H16   | 120.0      |
| C18-C17-C16   | 120.5(2)   | C18-C17-H17   | 119.7      |
| C16-C17-H17   | 119.7      | C17-C18-C19   | 120.1(3)   |
| C17-C18-H18   | 119.9      | C19-C18-H18   | 119.9      |
| C18-C19-C14   | 119.7(2)   | C18-C19-H19   | 120.2      |
| C14-C19-H19   | 120.2      | C21-C20-C25   | 117.53(14) |
| C21-C20-C2    | 123.40(13) | C25-C20-C2    | 119.04(13) |
| C20-C21-C22   | 121.34(14) | C20-C21-H21   | 119.3      |
| C22-C21-H21   | 119.3      | C23-C22-C21   | 120.56(14) |
| C23-C22-H22   | 119.7      | C21-C22-H22   | 119.7      |
| O3-C23-C22    | 125.37(14) | O3-C23-C24    | 115.66(14) |
| C22-C23-C24   | 118.96(14) | O4-C24-C25    | 124.59(14) |
| O4-C24-C23    | 115.35(14) | C25-C24-C23   | 120.05(14) |
| C24-C25-C20   | 121.54(14) | C24-C25-H25   | 119.2      |
| C20-C25-H25   | 119.2      | O3-C26-H26A   | 109.5      |
| O3-C26-H26B   | 109.5      | H26A-C26-H26B | 109.5      |
| O3-C26-H26C   | 109.5      | H26A-C26-H26C | 109.5      |
| H26B-C26-H26C | 109.5      | O4-C27-H27A   | 109.5      |
| O4-C27-H27B   | 109.5      | H27A-C27-H27B | 109.5      |
| O4-C27-H27C   | 109.5      | H27A-C27-H27C | 109.5      |
| H27B-C27-H27C | 109.5      | N2-O6-C36     | 108.95(12) |
| C50-O7-C53    | 117.14(13) | C51-O8-C54    | 116.50(13) |
| C35-N2-O6     | 115.70(12) | C35-N2-C28    | 111.48(12) |
| O6-N2-C28     | 117.26(12) | N2-C28-C33    | 115.51(13) |
| N2-C28-C29    | 99.98(12)  | C33-C28-C29   | 114.00(12) |
| N2-C28-H28    | 109.0      | C33-C28-H28   | 109.0      |
| C29-C28-H28   | 109.0      | C47-C29-C30   | 114.01(12) |
| C47-C29-C34   | 112.21(12) | C30-C29-C34   | 107.67(12) |
| C47-C29-C28   | 110.99(12) | C30-C29-C28   | 109.66(12) |
| C34-C29-C28   | 101.54(12) | C31-C30-C29   | 114.13(13) |
| C31-C30-H30A  | 108.7      | C29-C30-H30A  | 108.7      |
| C31-C30-H30B  | 108.7      | C29-C30-H30B  | 108.7      |
| H30A-C30-H30B | 107.6      | C30-C31-C32   | 110.42(13) |
| C30-C31-H31A  | 109.6      | C32-C31-H31A  | 109.6      |
| C30-C31-H31B  | 109.6      | C32-C31-H31B  | 109.6      |
| H31A-C31-H31B | 108.1      | C31-C32-C33   | 109.60(14) |
| C31-C32-H32A  | 109.8      | C33-C32-H32A  | 109.8      |
| C31-C32-H32B  | 109.8      | C33-C32-H32B  | 109.8      |
| H32A-C32-H32B | 108.2      | C37-C33-C28   | 111.58(14) |
| C37-C33-C32   | 112.52(14) | C28-C33-C32   | 113.52(14) |
| C37-C33-H33   | 106.2      | C28-C33-H33   | 106.2      |

|               |            |               |            |
|---------------|------------|---------------|------------|
| C32-C33-H33   | 106.2      | C35-C34-C29   | 105.00(12) |
| C35-C34-H34A  | 110.7      | C29-C34-H34A  | 110.7      |
| C35-C34-H34B  | 110.7      | C29-C34-H34B  | 110.7      |
| H34A-C34-H34B | 108.8      | O5-C35-N2     | 124.55(15) |
| O5-C35-C34    | 128.33(15) | N2-C35-C34    | 107.11(13) |
| O6-C36-H36A   | 109.5      | O6-C36-H36B   | 109.5      |
| H36A-C36-H36B | 109.5      | O6-C36-H36C   | 109.5      |
| H36A-C36-H36C | 109.5      | H36B-C36-H36C | 109.5      |
| C38-C37-C33   | 179.19(19) | C37-C38-C39   | 178.2(2)   |
| C40-C39-C38   | 179.4(2)   | C39-C40-C41   | 176.1(2)   |
| C42-C41-C46   | 119.51(17) | C42-C41-C40   | 120.61(17) |
| C46-C41-C40   | 119.75(18) | C43-C42-C41   | 119.99(18) |
| C43-C42-H42   | 120.0      | C41-C42-H42   | 120.0      |
| C42-C43-C44   | 119.9(2)   | C42-C43-H43   | 120.1      |
| C44-C43-H43   | 120.1      | C45-C44-C43   | 120.6(2)   |
| C45-C44-H44   | 119.7      | C43-C44-H44   | 119.7      |
| C44-C45-C46   | 120.0(2)   | C44-C45-H45   | 120.0      |
| C46-C45-H45   | 120.0      | C45-C46-C41   | 120.07(19) |
| C45-C46-H46   | 120.0      | C41-C46-H46   | 120.0      |
| C48-C47-C52   | 117.60(14) | C48-C47-C29   | 123.45(13) |
| C52-C47-C29   | 118.93(13) | C47-C48-C49   | 121.40(14) |
| C47-C48-H48   | 119.3      | C49-C48-H48   | 119.3      |
| C50-C49-C48   | 120.47(14) | C50-C49-H49   | 119.8      |
| C48-C49-H49   | 119.8      | O7-C50-C49    | 125.37(14) |
| O7-C50-C51    | 115.60(14) | C49-C50-C51   | 119.03(14) |
| O8-C51-C52    | 124.46(14) | O8-C51-C50    | 115.65(14) |
| C52-C51-C50   | 119.89(14) | C51-C52-C47   | 121.61(14) |
| C51-C52-H52   | 119.2      | C47-C52-H52   | 119.2      |
| O7-C53-H53A   | 109.5      | O7-C53-H53B   | 109.5      |
| H53A-C53-H53B | 109.5      | O7-C53-H53C   | 109.5      |
| H53A-C53-H53C | 109.5      | H53B-C53-H53C | 109.5      |
| O8-C54-H54A   | 109.5      | O8-C54-H54B   | 109.5      |
| H54A-C54-H54B | 109.5      | O8-C54-H54C   | 109.5      |
| H54A-C54-H54C | 109.5      | H54B-C54-H54C | 109.5      |
| C1S-O2S-C3S   | 117.8(4)   | O1S-C1S-O2S   | 122.9(4)   |
| O1S-C1S-C2S   | 125.5(5)   | O2S-C1S-C2S   | 111.5(5)   |
| C1S-C2S-H2SA  | 109.5      | C1S-C2S-H2SB  | 109.5      |
| H2SA-C2S-H2SB | 109.5      | C1S-C2S-H2SC  | 109.5      |
| H2SA-C2S-H2SC | 109.5      | H2SB-C2S-H2SC | 109.5      |
| O2S-C3S-C4S   | 106.8(4)   | O2S-C3S-H3SA  | 110.4      |
| C4S-C3S-H3SA  | 110.4      | O2S-C3S-H3SB  | 110.4      |
| C4S-C3S-H3SB  | 110.4      | H3SA-C3S-H3SB | 108.6      |
| C3S-C4S-H4SA  | 109.5      | C3S-C4S-H4SB  | 109.5      |

|               |           |               |           |
|---------------|-----------|---------------|-----------|
| H4SA-C4S-H4SB | 109.5     | C3S-C4S-H4SC  | 109.5     |
| H4SA-C4S-H4SC | 109.5     | H4SB-C4S-H4SC | 109.5     |
| C1T-O2T-C3T   | 115.7(10) | O1T-C1T-O2T   | 123.2(12) |
| O1T-C1T-C2T   | 122.0(16) | O2T-C1T-C2T   | 114.0(14) |
| C1T-C2T-H2TA  | 109.5     | C1T-C2T-H2TB  | 109.5     |
| H2TA-C2T-H2TB | 109.5     | C1T-C2T-H2TC  | 109.5     |
| H2TA-C2T-H2TC | 109.5     | H2TB-C2T-H2TC | 109.5     |
| O2T-C3T-C4T   | 109.2(9)  | O2T-C3T-H3TA  | 109.8     |
| C4T-C3T-H3TA  | 109.8     | O2T-C3T-H3TB  | 109.8     |
| C4T-C3T-H3TB  | 109.8     | H3TA-C3T-H3TB | 108.3     |
| C3T-C4T-H4TA  | 109.5     | C3T-C4T-H4TB  | 109.5     |
| H4TA-C4T-H4TB | 109.5     | C3T-C4T-H4TC  | 109.5     |
| H4TA-C4T-H4TC | 109.5     | H4TB-C4T-H4TC | 109.5     |

**Torsion angles (°) for rds625.**

|                 |             |                 |             |
|-----------------|-------------|-----------------|-------------|
| C9-O2-N1-C8     | 101.72(16)  | C9-O2-N1-C1     | -123.10(15) |
| C8-N1-C1-C6     | -159.34(13) | O2-N1-C1-C6     | 63.80(17)   |
| C8-N1-C1-C2     | -36.70(15)  | O2-N1-C1-C2     | -173.57(11) |
| N1-C1-C2-C20    | 155.69(12)  | C6-C1-C2-C20    | -80.90(16)  |
| N1-C1-C2-C3     | -77.17(14)  | C6-C1-C2-C3     | 46.25(17)   |
| N1-C1-C2-C7     | 36.50(13)   | C6-C1-C2-C7     | 159.91(13)  |
| C20-C2-C3-C4    | 74.21(17)   | C7-C2-C3-C4     | -161.02(13) |
| C1-C2-C3-C4     | -51.49(17)  | C2-C3-C4-C5     | 58.78(18)   |
| C3-C4-C5-C6     | -58.20(18)  | C4-C5-C6-C10    | -177.89(14) |
| C4-C5-C6-C1     | 54.79(19)   | N1-C1-C6-C10    | -63.35(18)  |
| C2-C1-C6-C10    | -178.06(13) | N1-C1-C6-C5     | 64.97(17)   |
| C2-C1-C6-C5     | -49.74(18)  | C20-C2-C7-C8    | -145.36(12) |
| C3-C2-C7-C8     | 88.62(14)   | C1-C2-C7-C8     | -26.49(14)  |
| O2-N1-C8-O1     | -21.0(2)    | C1-N1-C8-O1     | -158.49(14) |
| O2-N1-C8-C7     | 157.81(12)  | C1-N1-C8-C7     | 20.29(16)   |
| C2-C7-C8-O1     | -175.77(15) | C2-C7-C8-N1     | 5.52(16)    |
| C19-C14-C15-C16 | 1.3(4)      | C13-C14-C15-C16 | 178.1(2)    |
| C14-C15-C16-C17 | -2.8(5)     | C15-C16-C17-C18 | 1.6(6)      |
| C16-C17-C18-C19 | 1.1(7)      | C17-C18-C19-C14 | -2.5(6)     |
| C15-C14-C19-C18 | 1.4(5)      | C13-C14-C19-C18 | -175.4(3)   |
| C3-C2-C20-C21   | 8.6(2)      | C7-C2-C20-C21   | -113.91(16) |
| C1-C2-C20-C21   | 133.34(15)  | C3-C2-C20-C25   | -173.60(14) |
| C7-C2-C20-C25   | 63.90(18)   | C1-C2-C20-C25   | -48.84(18)  |
| C25-C20-C21-C22 | 0.7(2)      | C2-C20-C21-C22  | 178.59(14)  |
| C20-C21-C22-C23 | -0.2(2)     | C26-O3-C23-C22  | -2.1(2)     |
| C26-O3-C23-C24  | 178.53(15)  | C21-C22-C23-O3  | -179.32(15) |
| C21-C22-C23-C24 | 0.0(2)      | C27-O4-C24-C25  | 11.8(2)     |
| C27-O4-C24-C23  | -169.34(16) | O3-C23-C24-O4   | 0.0(2)      |

|                 |             |                 |             |
|-----------------|-------------|-----------------|-------------|
| C22-C23-C24-O4  | -179.42(15) | O3-C23-C24-C25  | 178.94(15)  |
| C22-C23-C24-C25 | -0.5(2)     | O4-C24-C25-C20  | 179.92(15)  |
| C23-C24-C25-C20 | 1.1(2)      | C21-C20-C25-C24 | -1.2(2)     |
| C2-C20-C25-C24  | -179.13(15) | C36-O6-N2-C35   | -102.43(16) |
| C36-O6-N2-C28   | 122.73(15)  | C35-N2-C28-C33  | 159.28(13)  |
| O6-N2-C28-C33   | -64.08(17)  | C35-N2-C28-C29  | 36.50(15)   |
| O6-N2-C28-C29   | 173.13(12)  | N2-C28-C29-C47  | -155.79(12) |
| C33-C28-C29-C47 | 80.36(16)   | N2-C28-C29-C30  | 77.34(14)   |
| C33-C28-C29-C30 | -46.51(17)  | N2-C28-C29-C34  | -36.35(14)  |
| C33-C28-C29-C34 | -160.20(13) | C47-C29-C30-C31 | -74.01(17)  |
| C34-C29-C30-C31 | 160.81(13)  | C28-C29-C30-C31 | 51.13(17)   |
| C29-C30-C31-C32 | -58.39(18)  | C30-C31-C32-C33 | 57.97(18)   |
| N2-C28-C33-C37  | 63.88(18)   | C29-C28-C33-C37 | 178.88(13)  |
| N2-C28-C33-C32  | -64.54(18)  | C29-C28-C33-C32 | 50.46(18)   |
| C31-C32-C33-C37 | 176.95(15)  | C31-C32-C33-C28 | -55.12(19)  |
| C47-C29-C34-C35 | 144.92(13)  | C30-C29-C34-C35 | -88.83(14)  |
| C28-C29-C34-C35 | 26.35(15)   | O6-N2-C35-O5    | 21.3(2)     |
| C28-N2-C35-O5   | 158.65(15)  | O6-N2-C35-C34   | -157.60(12) |
| C28-N2-C35-C34  | -20.24(17)  | C29-C34-C35-O5  | 175.78(15)  |
| C29-C34-C35-N2  | -5.38(16)   | C46-C41-C42-C43 | -0.3(3)     |
| C40-C41-C42-C43 | -176.0(2)   | C41-C42-C43-C44 | 0.8(4)      |
| C42-C43-C44-C45 | -0.8(4)     | C43-C44-C45-C46 | 0.1(4)      |
| C44-C45-C46-C41 | 0.5(4)      | C42-C41-C46-C45 | -0.4(3)     |
| C40-C41-C46-C45 | 175.4(2)    | C30-C29-C47-C48 | -7.3(2)     |
| C34-C29-C47-C48 | 115.48(16)  | C28-C29-C47-C48 | -131.69(15) |
| C30-C29-C47-C52 | 174.10(14)  | C34-C29-C47-C52 | -63.17(18)  |
| C28-C29-C47-C52 | 49.66(18)   | C52-C47-C48-C49 | -0.3(2)     |
| C29-C47-C48-C49 | -178.94(15) | C47-C48-C49-C50 | -0.1(2)     |
| C53-O7-C50-C49  | 5.3(2)      | C53-O7-C50-C51  | -175.64(15) |
| C48-C49-C50-O7  | 179.14(16)  | C48-C49-C50-C51 | 0.2(2)      |
| C54-O8-C51-C52  | -11.8(3)    | C54-O8-C51-C50  | 167.97(16)  |
| O7-C50-C51-O8   | 1.3(2)      | C49-C50-C51-O8  | -179.66(15) |
| O7-C50-C51-C52  | -178.96(15) | C49-C50-C51-C52 | 0.1(2)      |
| O8-C51-C52-C47  | 179.27(16)  | C50-C51-C52-C47 | -0.5(3)     |
| C48-C47-C52-C51 | 0.6(2)      | C29-C47-C52-C51 | 179.29(15)  |
| C3S-O2S-C1S-O1S | 2.3(7)      | C3S-O2S-C1S-C2S | 177.6(5)    |
| C1S-O2S-C3S-C4S | -176.3(4)   | C3T-O2T-C1T-O1T | 1.(2)       |
| C3T-O2T-C1T-C2T | -170.(2)    | C1T-O2T-C3T-C4T | -76.8(16)   |

**Anisotropic atomic displacement parameters ( $\text{\AA}^2$ ) for rds625.**

The anisotropic atomic displacement factor exponent takes the form:  $-2\pi^2 [ h^2 a^{*2} U_{11} + \dots + 2 h k a^* b^* U_{12} ]$

|    | $U_{11}$  | $U_{22}$  | $U_{33}$  | $U_{23}$   | $U_{13}$   | $U_{12}$  |
|----|-----------|-----------|-----------|------------|------------|-----------|
| O1 | 0.0180(5) | 0.0170(5) | 0.0174(5) | -0.0113(5) | -0.0034(4) | 0.0013(4) |

|     | $U_{11}$   | $U_{22}$   | $U_{33}$   | $U_{23}$    | $U_{13}$    | $U_{12}$   |
|-----|------------|------------|------------|-------------|-------------|------------|
| O2  | 0.0145(5)  | 0.0139(5)  | 0.0240(6)  | -0.0103(5)  | -0.0077(5)  | 0.0061(4)  |
| O3  | 0.0137(5)  | 0.0178(6)  | 0.0291(7)  | -0.0120(5)  | -0.0008(5)  | 0.0039(4)  |
| O4  | 0.0128(5)  | 0.0155(5)  | 0.0374(7)  | -0.0140(5)  | -0.0025(5)  | 0.0004(4)  |
| N1  | 0.0130(6)  | 0.0133(6)  | 0.0163(6)  | -0.0086(5)  | -0.0052(5)  | 0.0049(5)  |
| C1  | 0.0112(6)  | 0.0134(6)  | 0.0145(7)  | -0.0080(5)  | -0.0046(5)  | 0.0029(5)  |
| C2  | 0.0109(6)  | 0.0120(6)  | 0.0140(7)  | -0.0073(5)  | -0.0040(5)  | 0.0026(5)  |
| C3  | 0.0119(6)  | 0.0141(7)  | 0.0192(7)  | -0.0091(6)  | -0.0038(6)  | 0.0002(5)  |
| C4  | 0.0172(7)  | 0.0175(7)  | 0.0248(8)  | -0.0129(6)  | -0.0099(6)  | 0.0018(6)  |
| C5  | 0.0203(8)  | 0.0221(8)  | 0.0273(9)  | -0.0154(7)  | -0.0141(7)  | 0.0053(6)  |
| C6  | 0.0180(7)  | 0.0174(7)  | 0.0161(7)  | -0.0092(6)  | -0.0075(6)  | 0.0040(6)  |
| C7  | 0.0147(7)  | 0.0141(7)  | 0.0136(7)  | -0.0069(6)  | -0.0051(5)  | 0.0030(5)  |
| C8  | 0.0120(6)  | 0.0129(6)  | 0.0160(7)  | -0.0074(6)  | -0.0039(5)  | -0.0009(5) |
| C9  | 0.0134(7)  | 0.0249(8)  | 0.0332(10) | -0.0159(8)  | -0.0090(7)  | 0.0077(6)  |
| C10 | 0.0203(8)  | 0.0230(8)  | 0.0159(7)  | -0.0096(6)  | -0.0083(6)  | 0.0045(6)  |
| C11 | 0.0231(8)  | 0.0236(8)  | 0.0173(8)  | -0.0086(7)  | -0.0082(6)  | 0.0026(7)  |
| C12 | 0.0254(9)  | 0.0241(8)  | 0.0180(8)  | -0.0083(7)  | -0.0078(7)  | 0.0029(7)  |
| C13 | 0.0285(9)  | 0.0241(9)  | 0.0201(8)  | -0.0064(7)  | -0.0081(7)  | 0.0046(7)  |
| C14 | 0.0324(10) | 0.0220(9)  | 0.0259(9)  | -0.0025(7)  | -0.0085(8)  | 0.0064(7)  |
| C15 | 0.0351(11) | 0.0306(10) | 0.0263(10) | -0.0064(8)  | -0.0074(8)  | 0.0092(8)  |
| C16 | 0.0468(15) | 0.0380(13) | 0.0524(16) | -0.0091(12) | -0.0106(12) | 0.0227(11) |
| C17 | 0.063(2)   | 0.0363(14) | 0.070(2)   | 0.0104(14)  | -0.0085(17) | 0.0222(14) |
| C18 | 0.0591(19) | 0.0468(17) | 0.0598(19) | 0.0241(15)  | 0.0096(16)  | 0.0149(14) |
| C19 | 0.0394(13) | 0.0399(13) | 0.0451(15) | 0.0067(11)  | 0.0055(11)  | 0.0145(11) |
| C20 | 0.0111(6)  | 0.0123(6)  | 0.0126(6)  | -0.0058(5)  | -0.0041(5)  | 0.0022(5)  |
| C21 | 0.0138(7)  | 0.0125(6)  | 0.0162(7)  | -0.0074(6)  | -0.0053(6)  | 0.0031(5)  |
| C22 | 0.0159(7)  | 0.0136(7)  | 0.0171(7)  | -0.0089(6)  | -0.0055(6)  | 0.0046(5)  |
| C23 | 0.0126(7)  | 0.0157(7)  | 0.0151(7)  | -0.0069(6)  | -0.0028(6)  | 0.0043(5)  |
| C24 | 0.0124(7)  | 0.0138(7)  | 0.0190(7)  | -0.0070(6)  | -0.0042(6)  | 0.0014(5)  |
| C25 | 0.0129(7)  | 0.0129(7)  | 0.0181(7)  | -0.0086(6)  | -0.0043(6)  | 0.0022(5)  |
| C26 | 0.0197(8)  | 0.0218(8)  | 0.0288(9)  | -0.0135(7)  | 0.0018(7)   | 0.0056(6)  |
| C27 | 0.0192(8)  | 0.0148(7)  | 0.0346(10) | -0.0123(7)  | -0.0065(7)  | 0.0005(6)  |
| O5  | 0.0228(6)  | 0.0174(5)  | 0.0193(6)  | -0.0119(5)  | -0.0095(5)  | 0.0071(4)  |
| O6  | 0.0153(5)  | 0.0134(5)  | 0.0262(6)  | -0.0109(5)  | -0.0080(5)  | 0.0000(4)  |
| O7  | 0.0234(6)  | 0.0186(6)  | 0.0299(7)  | -0.0145(5)  | -0.0171(5)  | 0.0048(5)  |
| O8  | 0.0262(6)  | 0.0174(6)  | 0.0427(8)  | -0.0179(6)  | -0.0245(6)  | 0.0112(5)  |
| N2  | 0.0148(6)  | 0.0135(6)  | 0.0178(6)  | -0.0089(5)  | -0.0069(5)  | 0.0003(5)  |
| C28 | 0.0132(6)  | 0.0130(6)  | 0.0152(7)  | -0.0076(6)  | -0.0056(5)  | 0.0020(5)  |
| C29 | 0.0125(6)  | 0.0110(6)  | 0.0145(7)  | -0.0068(5)  | -0.0053(5)  | 0.0030(5)  |
| C30 | 0.0167(7)  | 0.0132(7)  | 0.0192(7)  | -0.0088(6)  | -0.0092(6)  | 0.0054(5)  |
| C31 | 0.0155(7)  | 0.0180(7)  | 0.0257(8)  | -0.0136(7)  | -0.0077(6)  | 0.0067(6)  |
| C32 | 0.0144(7)  | 0.0217(8)  | 0.0271(9)  | -0.0134(7)  | -0.0032(6)  | 0.0048(6)  |
| C33 | 0.0152(7)  | 0.0175(7)  | 0.0176(7)  | -0.0085(6)  | -0.0035(6)  | 0.0017(6)  |

|     | $U_{11}$   | $U_{22}$   | $U_{33}$   | $U_{23}$    | $U_{13}$    | $U_{12}$   |
|-----|------------|------------|------------|-------------|-------------|------------|
| C34 | 0.0149(7)  | 0.0142(7)  | 0.0144(7)  | -0.0070(6)  | -0.0048(6)  | 0.0017(5)  |
| C35 | 0.0155(7)  | 0.0128(6)  | 0.0168(7)  | -0.0076(6)  | -0.0076(6)  | 0.0049(5)  |
| C36 | 0.0168(8)  | 0.0271(9)  | 0.0378(10) | -0.0174(8)  | -0.0132(7)  | 0.0020(7)  |
| C37 | 0.0180(7)  | 0.0211(8)  | 0.0183(8)  | -0.0092(6)  | -0.0031(6)  | 0.0021(6)  |
| C38 | 0.0193(8)  | 0.0236(8)  | 0.0188(8)  | -0.0081(7)  | -0.0040(6)  | 0.0029(6)  |
| C39 | 0.0210(8)  | 0.0229(8)  | 0.0183(8)  | -0.0062(7)  | -0.0041(7)  | 0.0030(6)  |
| C40 | 0.0231(8)  | 0.0242(8)  | 0.0192(8)  | -0.0070(7)  | -0.0051(7)  | 0.0018(7)  |
| C41 | 0.0239(8)  | 0.0205(8)  | 0.0193(8)  | -0.0050(7)  | -0.0050(7)  | -0.0004(7) |
| C42 | 0.0315(10) | 0.0276(9)  | 0.0193(8)  | -0.0071(7)  | -0.0084(7)  | 0.0005(8)  |
| C43 | 0.0413(12) | 0.0357(11) | 0.0358(11) | -0.0137(9)  | -0.0173(10) | -0.0058(9) |
| C44 | 0.0426(13) | 0.0273(10) | 0.0342(11) | -0.0030(9)  | -0.0092(10) | -0.0134(9) |
| C45 | 0.0456(13) | 0.0292(10) | 0.0212(9)  | -0.0004(8)  | -0.0095(9)  | -0.0087(9) |
| C46 | 0.0426(12) | 0.0288(10) | 0.0206(9)  | -0.0040(8)  | -0.0123(8)  | -0.0077(9) |
| C47 | 0.0114(6)  | 0.0123(6)  | 0.0139(7)  | -0.0065(5)  | -0.0036(5)  | 0.0012(5)  |
| C48 | 0.0141(7)  | 0.0123(6)  | 0.0185(7)  | -0.0077(6)  | -0.0056(6)  | 0.0029(5)  |
| C49 | 0.0169(7)  | 0.0131(7)  | 0.0181(7)  | -0.0090(6)  | -0.0055(6)  | 0.0015(5)  |
| C50 | 0.0143(7)  | 0.0158(7)  | 0.0174(7)  | -0.0083(6)  | -0.0068(6)  | 0.0005(5)  |
| C51 | 0.0162(7)  | 0.0144(7)  | 0.0214(8)  | -0.0092(6)  | -0.0097(6)  | 0.0041(5)  |
| C52 | 0.0151(7)  | 0.0137(7)  | 0.0206(7)  | -0.0106(6)  | -0.0079(6)  | 0.0039(5)  |
| C53 | 0.0344(10) | 0.0209(8)  | 0.0283(9)  | -0.0152(7)  | -0.0192(8)  | 0.0044(7)  |
| C54 | 0.0287(9)  | 0.0165(8)  | 0.0433(11) | -0.0161(8)  | -0.0219(9)  | 0.0097(7)  |
| O1S | 0.0486(19) | 0.060(2)   | 0.0409(18) | -0.0353(16) | -0.0199(15) | 0.0186(15) |
| O2S | 0.0277(15) | 0.077(2)   | 0.0345(18) | -0.0199(17) | -0.0117(14) | 0.0167(15) |
| C1S | 0.035(2)   | 0.074(3)   | 0.040(2)   | -0.043(2)   | -0.0215(18) | 0.029(2)   |
| C2S | 0.027(2)   | 0.162(7)   | 0.036(2)   | -0.051(3)   | -0.0165(18) | 0.037(3)   |
| C3S | 0.0371(18) | 0.050(2)   | 0.040(2)   | -0.0252(17) | -0.0199(15) | 0.0162(16) |
| C4S | 0.040(2)   | 0.047(2)   | 0.055(3)   | -0.020(2)   | -0.015(2)   | 0.0140(18) |
| O1T | 0.085(7)   | 0.104(7)   | 0.057(5)   | -0.045(5)   | -0.019(5)   | 0.041(6)   |
| O2T | 0.049(4)   | 0.092(6)   | 0.056(5)   | -0.041(4)   | -0.020(3)   | 0.015(3)   |
| C1T | 0.066(6)   | 0.093(9)   | 0.056(5)   | -0.040(5)   | -0.012(5)   | 0.020(6)   |
| C2T | 0.072(9)   | 0.28(4)    | 0.122(16)  | -0.056(17)  | -0.036(9)   | 0.035(11)  |
| C3T | 0.043(4)   | 0.066(5)   | 0.057(6)   | -0.033(4)   | -0.019(4)   | 0.009(4)   |
| C4T | 0.099(11)  | 0.166(16)  | 0.22(2)    | -0.159(18)  | -0.111(14)  | 0.075(11)  |

**Hydrogen atomic coordinates and isotropic atomic displacement parameters ( $\text{\AA}^2$ ) for rds625.**

|     | $x/a$   | $y/b$  | $z/c$  | $U(\text{eq})$ |
|-----|---------|--------|--------|----------------|
| H1  | -0.0576 | 0.0068 | 0.6581 | 0.015          |
| H3A | 0.1754  | 0.2263 | 0.5237 | 0.018          |
| H3B | 0.0582  | 0.2878 | 0.5411 | 0.018          |
| H4A | 0.1921  | 0.2693 | 0.6353 | 0.021          |
| H4B | 0.0385  | 0.2236 | 0.6942 | 0.021          |
| H5A | 0.1906  | 0.1207 | 0.7481 | 0.024          |

|      | <b>x/a</b> | <b>y/b</b> | <b>z/c</b> | <b>U(eq)</b> |
|------|------------|------------|------------|--------------|
| H5B  | 0.2582     | 0.1229     | 0.6516     | 0.024        |
| H6   | -0.0180    | 0.0527     | 0.7606     | 0.019        |
| H7A  | -0.0920    | 0.1266     | 0.4929     | 0.016        |
| H7B  | 0.0287     | 0.2111     | 0.4442     | 0.016        |
| H9A  | 0.3671     | 0.0196     | 0.5016     | 0.033        |
| H9B  | 0.3632     | -0.0802    | 0.5782     | 0.033        |
| H9C  | 0.3448     | 0.0067     | 0.6012     | 0.033        |
| H15  | 0.4124     | -0.3586    | 0.8246     | 0.04         |
| H16  | 0.4682     | -0.5045    | 0.9004     | 0.061        |
| H17  | 0.3301     | -0.6001    | 1.0436     | 0.085        |
| H18  | 0.1310     | -0.5540    | 1.1092     | 0.094        |
| H19  | 0.0644     | -0.4126    | 1.0297     | 0.066        |
| H21  | -0.1296    | 0.2873     | 0.6265     | 0.016        |
| H22  | -0.3558    | 0.2989     | 0.6948     | 0.018        |
| H25  | -0.2479    | 0.0378     | 0.6469     | 0.017        |
| H26A | -0.5827    | 0.3096     | 0.7131     | 0.037        |
| H26B | -0.5633    | 0.2589     | 0.8092     | 0.037        |
| H26C | -0.7082    | 0.2457     | 0.7971     | 0.037        |
| H27A | -0.4332    | -0.0473    | 0.6651     | 0.034        |
| H27B | -0.5600    | -0.0987    | 0.7533     | 0.034        |
| H27C | -0.4141    | -0.0786    | 0.7609     | 0.034        |
| H28  | 0.4106     | 0.5087     | 0.6561     | 0.016        |
| H30A | 0.4004     | 0.7894     | 0.5386     | 0.018        |
| H30B | 0.2990     | 0.7276     | 0.5234     | 0.018        |
| H31A | 0.1774     | 0.7709     | 0.6356     | 0.022        |
| H31B | 0.2780     | 0.7262     | 0.6924     | 0.022        |
| H32A | 0.0966     | 0.6236     | 0.6552     | 0.025        |
| H32B | 0.0756     | 0.6225     | 0.7508     | 0.025        |
| H33  | 0.2769     | 0.5563     | 0.7588     | 0.02         |
| H34A | 0.5200     | 0.7118     | 0.4412     | 0.017        |
| H34B | 0.5976     | 0.6277     | 0.4885     | 0.017        |
| H36A | 0.1266     | 0.5176     | 0.5071     | 0.037        |
| H36B | 0.0584     | 0.5072     | 0.6064     | 0.037        |
| H36C | 0.0605     | 0.4187     | 0.5861     | 0.037        |
| H42  | -0.2016    | 0.1447     | 0.8202     | 0.032        |
| H43  | -0.3537    | 0.0095     | 0.8993     | 0.044        |
| H44  | -0.3920    | -0.0744    | 1.0522     | 0.047        |
| H45  | -0.2754    | -0.0258    | 1.1256     | 0.043        |
| H46  | -0.1197    | 0.1076     | 1.0470     | 0.039        |
| H48  | 0.5068     | 0.7878     | 0.6246     | 0.017        |
| H49  | 0.6699     | 0.7994     | 0.6901     | 0.018        |
| H52  | 0.6130     | 0.5403     | 0.6398     | 0.018        |



|      | <b>x/a</b> | <b>y/b</b> | <b>z/c</b> | <b>U(eq)</b> |
|------|------------|------------|------------|--------------|
| H53A | 0.8780     | 0.8099     | 0.7104     | 0.036        |
| H53B | 0.9222     | 0.7429     | 0.7939     | 0.036        |
| H53C | 0.7650     | 0.7549     | 0.8052     | 0.036        |
| H54A | 0.7820     | 0.4540     | 0.6567     | 0.039        |
| H54B | 0.6727     | 0.4235     | 0.7532     | 0.039        |
| H54C | 0.8267     | 0.4026     | 0.7439     | 0.039        |
| H2SA | 0.1662     | 0.1772     | -0.0202    | 0.106        |
| H2SB | 0.1799     | 0.2767     | -0.0211    | 0.106        |
| H2SC | 0.0812     | 0.1931     | 0.0646     | 0.106        |
| H3SA | 0.5399     | 0.1599     | 0.0382     | 0.047        |
| H3SB | 0.4999     | 0.2320     | 0.0809     | 0.047        |
| H4SA | 0.6417     | 0.2826     | -0.1012    | 0.072        |
| H4SB | 0.7118     | 0.2836     | -0.0306    | 0.072        |
| H4SC | 0.6043     | 0.3534     | -0.0574    | 0.072        |
| H2TA | 0.1206     | 0.1790     | 0.0431     | 0.252        |
| H2TB | 0.1917     | 0.2549     | -0.0564    | 0.252        |
| H2TC | 0.1434     | 0.2850     | 0.0235     | 0.252        |
| H3TA | 0.6181     | 0.2497     | -0.1021    | 0.063        |
| H3TB | 0.5456     | 0.1686     | -0.0051    | 0.063        |
| H4TA | 0.6004     | 0.3544     | -0.0358    | 0.18         |
| H4TB | 0.6948     | 0.2772     | -0.0011    | 0.18         |
| H4TC | 0.5419     | 0.2693     | 0.0599     | 0.18         |
